# Supplementary material for: Paleotsunami deposits along the coast of Egypt correlate with historical earthquake records of eastern Mediterranean
Source: Copernicus journal article supplement (doi:10.5194/nhess-2018-62), 2018-03-12
Supplement: Supplementary file [file nhess-2018-62-AC2-supplement.pdf]

Reply to **RC2** Review of Pedro Costa

**Section 1: General comments:**

**Comment #1:**

*Restructure the manuscript. As it is results, discussion and conclusions are confusing. There are several paragraphs of results that need to be moved to discussion.*

**Reply**

The authors agree with the reviewer suggestion of moving some paragraphs of results to discussion. Indeed, some sections of text needed to be transferred and the current structure of manuscript is now more consistent with the aim of the paper.

**Comment #2:**

*The authors try to guide the reader. That is wrong. From an early part they assume the "event layers" are tsunami deposits. They should let the reader get to that conclusion and I think it is wrong to state the layers are associated with a tsunami event in the results. You should only do that in the Discussion.*

**Reply**

The reviewer made a point here and we have removed the mention on the tsunami deposits and replaced it with high energy sedimentary layers all manuscript except in the discussion section (see all changes as in following table):

| <b>Previous line</b> | <b>Previous mention</b> | <b>New mention</b>      | <b>New line</b> |
|----------------------|-------------------------|-------------------------|-----------------|
| 97                   | Paleotsuanmi            | high energy sedimentary | 109             |
| 235                  | tsunami                 | high energy sedimentary | 255             |
| 261                  | tsunami                 | high energy sedimentary | 278             |
| 298                  | tsunami                 | high energy sedimentary | 306             |
| 307                  | tsunami                 | high energy sedimentary | 316             |
| 320                  | tsunami                 | high energy sedimentary | 324             |
| 320                  | tsunami                 | omit                    | 325             |
| 327                  | tsunami                 | high energy sedimentary | 332             |
| 329                  | tsunami                 | high energy sedimentary | 334             |
| 333                  | tsunami                 | high energy sedimentary | 338             |
| 333, 337             | tsunami                 | omit                    | 340,344         |
| 341                  | tsunami                 | high energy sedimentary | 348             |

|               |                       |                         |              |
|---------------|-----------------------|-------------------------|--------------|
| 344           | tsunami               | high energy sedimentary | 352          |
| 345           | tsunami               | omit                    | 353          |
| 346           | tsunami               | omit                    | 355          |
| 350           | tsunami               | high energy sedimentary | 358          |
| 355           | tsunami               | high energy sedimentary | 363          |
| 357           | tsunami               | high energy sedimentary | 365          |
| 359           | tsunami               | high energy sedimentary | 367          |
| 359           | tsunami               | omit                    | 367          |
| 361           | tsunami               | omit                    | 369          |
| 363           | tsunami               | omit                    | 371          |
| 369           | tsunami               | high energy sedimentary | 377          |
| 370           | tsunami               | high energy sedimentary | 378          |
| 372           | transport of tsunamis | omit                    | 380          |
| 374           | tsunami               | high energy sedimentary | 382          |
| 375, 378, 379 | tsunami               | omit                    | 382, 386,387 |
| 383           | tsunami               | high energy sedimentary | 391          |
| 384           | tsunami               | high energy sedimentary | 392          |
| 385           | tsunami               | omit                    | 393          |
| 389           | tsunami               | omit                    | 397          |
| 392           | tsunami               | high energy sedimentary | 400          |
| 393           | tsunami               | omit                    | 401          |
| 397           | tsunami               | omit                    | 405          |
| 401           | tsunami               | high energy sedimentary | 409          |
| 402           | tsunami               | high energy sedimentary | 411          |
| 405           | tsunami               | high energy sedimentary | 412          |
| 406           | tsunami               | omit                    | 413          |

|     |         |                         |     |
|-----|---------|-------------------------|-----|
| 410 | tsunami | omit                    | 417 |
| 414 | tsunami | high energy sedimentary | 420 |
| 415 | tsunami | high energy sedimentary | 422 |
| 418 | tsunami | high energy sedimentary | 425 |
| 419 | tsunami | omit                    | 426 |
| 423 | tsunami | omit                    | 430 |
| 429 | tsunami | high energy sedimentary | 436 |
| 434 | tsunami | high energy sedimentary | 440 |
| 435 | tsunami | high energy sedimentary | 441 |
| 443 | tsunami | high energy sedimentary | 450 |
| 454 | tsunami | omit                    | 461 |
| 460 | tsunami | high energy sedimentary | 467 |

**Comment #3:**

*The authors are not convincing explaining the poor dating chronology established. I accept you could have dates in reverse order in the deposits (incorporation of older material). However, that should not happen in the immediately overlying and underlying layers. These should be in chronological order...and they are not.*

**Reply**

The reviewer discusses the reworked sedimentation and reverse order of dating. However, one has to pay attention from the field work in trenches and cores that samples are not easy to find and to collect, especially before and after the presumable tsunami layer.

The constraint of past tsunami chronology is based on 5 samples in 1 meter stratigraphic section at Kefr Saber, and 8 samples in 2 meters of sediments at El Alamein site. Taking into account the difficulty and effort made in collecting valuable samples for dating, we disagree with the reviewer that our results is based on “*poor dating chronology*”.

In presenting the 46 samples including reverse dating order, our work shows the difficulty of sampling and dating in such environment (with sometimes recrystallization and/or remineralization, contamination). Clearly, we are not in the ideal case-study of collected samples showing a straightforward chronological and stratigraphic order in such coastal environment.

In our case, we found it interesting that all obtained dating are presented together with the reworking difficulty that is openly discussed in lines 578-588. We also show how to separate the dated materials in groups and how with our processed data the dating analysis becomes consistent with the historical earthquake tsunami catalogue.

**Comment #4:**

*A - There is poor quantification of data in this manuscript*

**Reply**

In our manuscript we have analyzed 120 samples as following:

- 1- Grain size analysis (mean grain size and sorting)
- 2- Bulk mineralogy (XRD diffractions)
- 3- Total organic and inorganic matter, in addition of
  - a- Detail descriptions (color , microfossil content)
  - b- High-resolution of photograph of sedimentary sections
  - c- X-ray scanning of cores
  - d- Microfossils identification
- 4- Radiocarbon dating of 46 samples at two sites, and
- 5- Geochemical analysis in the Suppl. Material (Table S1 to S12 and Figs. S4-S15).

We do not think that this can be called “*poor quantification of data*”.

*B - Figure 5, one cannot understand what was the resolution used. How many samples have you analyzed? On another topic you mention Pyrite on the Discussion has being widespread in the deposit when in fact it only appears in Core 7.*

**Reply**

We have added details in lines 113-116 to explain that our sampling rate was 15 cm in each core for geochemical analysis, and every 3 cm for the magnetic susceptibility. As for the Pyrite and/or goethite, they are found with minor percent (less than in most of cores with relative high value at the base of event layer (557-563)).

**Comment #5:**

*The literature review is extremely poor and outdated. Introduction needs to be totally rewritten. There is a insignificant number of papers published after 2010. In particular, after the Tohoku-oki tsunami in 2011, a relevant number of papers were published moving forward this field of science. They should have been referred to.*

**Reply**

Perhaps the reviewer did not find enough references of paleotsunami studies in the East Mediterranean, this is unfortunate but it is the reality. Although we disagree with the qualification of “*outdated literature*” (much of our references concern reports on past earthquakes and tsunamis in historical documents), and the aim of our manuscript is not meant to do a review on the 2004 Sumatra and 2011 Tohoku earthquake tsunamis. Nevertheless, we have added 16 new references (see underlined) and among them 8 are post-2010.

Although we find the request of a total rewrite of the introduction somehow excessive, we have included some changes. We have been submitting papers for publication in the past 30 years or so, and our introductions were generally considered as well written.



**Comment #6:**

*The authors identify "event layers" based in a very limited number of lithostratigraphic evidences and none (or even all together) are sufficient to ascribe a layer as a tsunami deposit. They need to address this!*

**Reply**

Our criteria to recognize signatures of tsunami event layers (see also section 4) are also those reported in Donato et al. (2008), Font et al. (2010), Chagué-Goff, et al. (2011), De Martini et al. (2012; with our direct observations of tsunami layers during field investigations of our colleagues in Sicily), Malik et al. (2015), Matsumoto et al. (2016) along with our post-earthquake tsunami deposit observations (mainly in coastal Honshu following the 2011 earthquake).

Beside the trenching and coring analysis of section 5, we summarize in section 6 (lines 478 to 521) our results based on detailed description of sedimentary successions that include units rich in organic matter with bioclasts, laminations, where X-rays, magnetic susceptibility, and determination of heavy minerals with radiocarbon dating of 46 samples are applied.

The identification of four high energy sedimentary layer with the discovery of the similar mixed white sand sheet layers with broken shells at two sites (Kefer Saber and El Alamein), located ~200 km apart, and their dating with correlation of three of them with past tsunamigenic earthquakes is a striking evidence of tsunami deposits.

This is extensively addressed in sections 4, 5 and 6 of our manuscript and cannot be considered as limited evidences.

**Comment #7**

*Furthermore, there are several paradoxes like relying on (volume) magnetic susceptibility to identify the layers as tsunami-related. For example, if you have coarser material it is likely you could have more lithic material and more magnetic minerals. However, you mention on lines 566 and 567 that your magnetic susceptibility peaks correspond with the higher values of organic matter and carbonates. This is something difficult to explain because organic matter and carbonates have very low magnetic susceptibility values.*

**Reply**

We clarify this relevant issue in text-lines 557-563. The low magnetic susceptibility peaks reflect high content of organic matter and carbonates and these analytic results characterize the tsunami related deposits. However, in some cases minerals like pyrite or Fe oxides (goethite) in sediments are found in the bottom of tsunami layers (or intercalated) and they correspond to relatively higher peak of magnetic susceptibility (20-100  $10^{-6}$ ).

**Comment #8**

*The manuscript needs proofreading. There are several mistakes and misspellings and the work will benefit from the input of a English native speaker. There are parts that are just too wordy and redundant.*

**Reply**

The new version of manuscript is revised for the English syntax and grammar.

**Comment #9**

*In the figures, and also elsewhere, you need to level the coring to m above mean sea level. You make correlations on Figure 7 assuming the samples are all at the same height above msl. That is wrong.*

**Reply**

This is corrected and updated (see lines 982-983).

**Comment #10**

*You need to provide the regional wave regime. How frequent are storms? Can they over-top the 2m high coastal dunes?*

**Reply**

In the Mediterranean, the tropical to subtropical cyclones storms are frequent seasonal events, with ~100 recorded tropical like storms between 1947 and 2011. From tide stations recorded in front of Alexandria, the maximum wave height surge is 43 cm between 1971-2004 (Hamed et al., 1988), the maximum wave height surge is 76.9 cm between 1996-2000 (Hussein et al., 2010). See also supplementary material.

The comparison between storm and tsunami depends on the strong waves and their content of reworked deposits, fossils or organic matter and the sorting of grain size. Tsunami deposits tend to show much sorting and contain much bioclasts due to its powerful waves.

**Section 2: Comments in the text with requested changes in manuscript and authors changes in text:**

**C1: Line 82-84 - How about Storegga? Landslides tsunamis can cause widespread effects.**

R1: We have added explanations in lines 82-84

**C2: Line 83 - "recent example" Tinti et al. (2005) has 13 years.**

R2: Corrected

**C3: Line 85-96 - extremely poor literature review. Why do you cite two papers from the Indian Ocean and the Pacific and only one from the Mediterranean?**

R3: We add Tyuleneva et al., 2017 as a second example in the Mediterranean (lines 106-108).

**C4: Line 97 and Line 105 - repetition of idea in the same paragraph**

R4: We removed lines 118-119.

**C5: Line 108-Tsunami catalogue of Egypt - is there a specific reference? where can we access it?**

R5: Ambraseys et al. (2005) is the specific reference for Egypt (added in line 121)

**C6: Line 115-119- Please rewrite.**

R6: We have rewritten in lines 128 to 133.

**C7:Line 124 - Please remove "in".**

R7: Removed

**C8: Line 125 - Please write "Rhodes"**

R8: Rhodes is rewritten (line 138).

**C9:Line 126-128 - Please rewrite**

R9: The sentence is rewritten in lines 147-150.

**C10:Line 130-132 - Repetition of 1st sentence of the paragraph**

R10: The repeated sentence is removed

**C11:Line 136-150 - Please rewrite, simplifying the text.**

R11:151 to 160 updated with simplified text

**C12: Line 169 Please replace "designated" by "likely sites to preserve past tsunami deposits".**

R12: Done in line 179

**C13:Line 178-179 - is a challenge everywhere.**

R13: Yes sure, but here the problem is in the Eastern Mediterranean region

**C14:Line 180 - Please add a more recent reference**

R14: We add Morton et al., 2007 (updated lines 191)

**C15:Line 185 - Please correct reference.**

R15: Corrected at line 196

**C16: Line 185-200 - needs to be rewritten and to be reorganized to clearly state which are the common tsunami deposit features. There are many missing. Please check papers by Chagué et al. (2011; 2012), etc.**

R16: The paragraph is rewritten to point out common features of tsunami deposits. We also add Chagué et al. (2011) in line 208.

**C17: Line 212 - Please change here and elsewhere in the results chapter reference to "tsunami deposits". Change it to "event layer".**

R17: Except in discussion and conclusions, the “tsunami” term is changed in “high energy sedimentary layer” (see also table in above reply to comment #2).

**C18: Line 225 - You should cite Folk and Ward (1957) for grain-size distributions (line 225).**

R18 & R19: Done in updated line 238

**C20: Line 238 -Please change the name of this section to results.**

R20: In order to be more specific, we prefer the title **Description of sedimentary layers in trenches and cores with C14 dating results**, updated in lines 258.

**C21: Line 254-257 -Please pass it to the discussion.**

R21: The change is in discussion section (lines 553- 555)

**C22: Line 261 - Change it to "event layer".**

R22: We used instead high energy sedimentary layer in line 278

**C23: Line 273 – here the deposit is 30-73 cm in all trenches P1 to P4 but on line 250 is just from 30-50 cm!**

R23: This is corrected in line 290 with 25-55 cm depth

**C24:Page 11-page 19 - all this results section deserves the following comments:**

**a) In P2 you assume to have >5000 years sedimentation in 27 cm. How come the top 70cm is just app. 2000 years? What changed? How do you explain this difference? How about sea-level changes, how do they constrained sedimentation rates in these lagoons?**

We answer the question in lines 578-588. The lagoon sedimentary environment is often made of mixed and reworked marine and continental deposits. The interpretation of these deposits as a chronological order is problematic.

Sea level change is negligible in the late Holocene time [see also Fleming, K. *et al.* Refining the eustatic sea-level curve since the Last Glacial Maximum using far-and intermediate-field sites. *Earth Planet. Sci. Lett.* **163**, 327-342 (1998)].

**b) I acknowledge and appreciate that you assume the shortcoming of the dating obtained but how come not a single date in several cores are in stratigraphical order? Again, if it was just the event layers...you just get samples in the right order in the under and overlying layers. You need to offer a convincing explanation for this fact. Just saying that this was due to reworking by the "tsunami" is not enough.**

We provide explanations in lines 578 to 588 for the overlapping dates and also in our reply above for comment #3.

**c) How come (on line 275) you state "related chronology are comparable in all trenches" when you assume dates have such a wide range? You need to support this sentence with clear data correlation.**

Regardless of the reworked deposits, we consider the stratigraphic succession of neighboring trenches (P1 to P4) at Kefr Saber, and their relative sedimentary chronology of units deposited in the same lagoon as comparable. In order to overlook the old ages due to reworked deposits, we select radiocarbon dates younger than 2000 year BP and obtain a consistent chronological succession. (see changes in lines 292-294).

**d) Dendropoma shell and its dating. What species was dated. There are some Dendropoma species that live beyond 50 m below msl. If these boulders were transported inland and the shells are well-preserved they had to had been transported in suspension (if they were**

**dragged or rolled the shells would break). You state they were dragged on line 286. Can you try to explain this more consistently?**

The common species type found in boulders is *Dendropoma Petraeum* and *Vermetus Triquetrus*. The boulder surfaces are fully submerged in the sea with *Dendropoma* species and then transported by tsunami waves or storms waves. Some *Dendropoma* and *Vermetus* are stuck on the boulder and hence well preserved.

**C25: Line 269-270 should be moved to Discussion**

R25: Moved in discussion section (lines 579 to 581)

**C26: Line 281-288 should be moved to Discussion**

R26: Moved to lines 519 to 528 (section 6)

**C 27: Line 300 the layer had brown clay sediments or consisted of brown clay sediments? The poor sorting was measured how (visually or after grain-size analysis)? What were the main components of these populations (Shells, quartz and clay material)?**

R27: It consists of brown clay sediments (see line 300 – 301).

These methodological details are added in the supplementary material (methodology section).

The main values of each layer are given in the core figures according to the detailed description of layers and the bulk mineralogy (including weight percent of minerals, Tables S1 to S12 and Figs. S4 to S15 in the supplementary material).

**C28: Line 303 - please replace "extremely bad sorting" by "very poor sorting".**

R28: Done in line 311

**C29: Line 305 – please replace "bad" sorting by "poor sorting".**

R29: Done in line 313

**C30: Line 307 - "some turbiditic structures". Which ones? Be clear and specific about which sedimentary structures you are describing**

R30: We mean by turbiditic structures like rip clasts, cross bedding and laminations (line 307). X-ray scanning show vertically and horizontally oriented gastropods seen in cores before opening and cut in two longitudinal half. These structures are used to identify the tsunami deposits

The mention to the turbiditic features is added in the supplementary material (Fig S3).

**C31: Line 310-318 should moved to Discussions**

R31: We have omitted these lines because they are repeated in section 6

**C32: Line 328- articulated shell?**

R32: No, the two samples dated in core 2 are gastropods and not articulated shell.

**C33: Line 337 - "Organic matter >2" in which unit is this expressed? % of dry weight? % of total sediment fraction?**

R33: In Core 4, the white sand at ~12.5 cm depth, where the organic matter > 2 % of dry weight of total sediment fraction, at line 354.

**C34: Line 349-352 - Discussion and again repeating the same explanation**

R34: We here necessarily describe once again why we have the shell age 32887-34447 BC. We consider that our explanation on the strong wave action during catastrophic events may stay in this section.

**C35: Line 356 - well, could be the limit of tsunami coarse deposition. Not the inundation limit. Only with geochemistry you will be able to establish more accurately the likely limit of inundation.**

R35: Yes, we agree.

**C36: Line 383 - the date range obtained is almost 1000 years! You need to constrain the ages much better and more accurately.**

R36: The dated sample is made of shell, and the large age range is from the laboratory dating on which we proceed with correction of the reservoir effects (line 390-391).

**C37: Line 384-391 and elsewhere why are these layers considered to be tsunami related?**

R37: As previously explained (see table of comment #3), we have changed “tsunami deposits” by “high energy sedimentary layers” until section 6 of the manuscript.

**C38: You mention on lines 460- 462 that these "tsunami" layers have been identified based in "photography and x-rays, magnetic susceptibility, organic/mineral content and by the existence of mixed coarse and fine sand with broken marine shells". This is poor and insufficient. You need to provide more data and go through a vast list of sedimentological criteria before you rush to conclusions. See papers by Chagué et al., 2011 and 2012, Costa et al., 2012 and 2016, etc. for comparison**

R38: We do not rush to conclusions. The manuscript has long sections of layer descriptions with sample analysis, and we provide results that lead to the identification of tsunami deposits. We appreciate the suggested and helpful publications of Chagué et al. (2011) and Costa et al. (2014); (see lines 204 to 208, and lines 88 to 91).

**C39: Line 466-477 - Please move it to Discussion.**

R39: We have moved these paragraphs to Discussion section (lines 564-577).

**C40: Line 489- 490 - Another crucial topic. Why you say they are more likely to be a tsunami than a storm? Have you detected any storm layers? But you state they are more frequent and they are likely to over-top the dune field.**

R40: Please see our reply of comment #10 here above and lines 541 to 556 in discussion section.

**C41: Line 495 - You only mentioned Pyrite on core 7 and now.... Heavy minerals? Which ones? Did you counted them? Please provide quantitative data.**

R41: We add the bulk mineralogy semi quantitative data in supplementary material (Tables S1 to S12 and Figs. S4 to S15).

**C42: Line 500 - pebbles and loading structure- please clarify text.**

R42: The loading structure is a typical sedimentary marker of deposits. It also means that the heavy pebbles and coarse sediments transported by the tsunami wave in the lagoon end at the base of the sedimentary succession.

**C43: Line 506- You wrongly cite Folk (1968) and state he mention ">5" mark for organic matter in tsunami deposits!?**

R43: Yes indeed, we removed Folk 1968 (update line 496-497)

**C44: Line 508-522 - this paragraph belongs in the discussion.**

R44: This section is part of summary of results and we prefer not to move it.

**C45: Line 525-527 - Please rewrite this sentence.**

R45: Changed in 531 to 532.

**C46: Line 534-536 - sentence not supported by the data presented.**

R46: The reviewer apparently does not accept our results and interpretation.

**C47: Line 538-540 - Do storm layers exist? If no, why? If yes, please compare them with your "event layers".**

R47: The discrimination between storm and tsunami deposits is largely treated in the manuscript and in discussion (see lines 188-208, 541-556). We explain in our manuscript that frequency and signature of tsunami deposits significantly contrast from those of storm events that leave a faint sedimentary signature.

**C48: Line 545-547 - a bimodal curve only represents two likely sediment sources. Please update references and clarify idea**

R48: Bimodal means the existence of fine and coarse grain size of sediments. The bimodal sediment distribution is a common feature of tsunami deposits that also depend on the proportion of fine and coarse particles, and degree of erosion during the wave propagation. (new reference: Scheffers and Kelletat, 2003 in line 551)

**C49: Line 549 - "consistent depth". Well, below surface yes but you need to provide height above mean sea level to make this correlation credible.**

R49: Done in updated lines 982 to 983.

**C50: Line 557 - You have a lack of radiocarbon dates between the Younger Dryas and Holocene sea-level stabilization. Is there a scientific justification for this fact? Or a methodological one?**

R50: Our observation on the radiocarbon hiatus [i.e., in between 13430 year BP and 5065 year BP] may simply be due to erosion processes (taking into account the sea level and exposed continental domain during the late Pleistocene and early Holocene). However, we have no documented work with precise data on this issue.

**C51: Line 559-561 - Strongly disagree. You have not proven this point.**

R51: All evidences (proofs) are presented in the manuscript and we do not share the reviewer opinion. Our interpretation supported by the presented data and results in manuscript suggests that the three high energy sedimentary layers made of mixed white sand and coarse layers with broken fossils (also observed 200 km apart for one of them) are the trace of tsunamis events in AD 365, 1303 and 1870.

**C52: Line 565 - "chemical characteristics". You could also provide geochemical data. Which elements have you measured?**

R52: We did bulk mineralogy using XRD and identified the minerals according to the fingerprint ( $\text{\AA}$ ) of minerals with semi quantities analysis. We provide the bulk mineralogy analysis in supplementary material (Tables S1 to S12 and Figs. S4 to S15).



1  
2  
3  
4  
5  
6  
7  
8  
9  
10  
11  
12  
13  
14  
15  
16  
17  
18  
19  
20  
21  
22  
23  
24  
25  
26  
27  
28  
29  
30  
31  
32  
33  
34  
35

**Paleotsunami deposits along the coast of Egypt correlate with  
historical earthquake records of eastern Mediterranean**

A. Salama, (1, 2, \*), M. Meghraoui (1\*\*), M. El Gabry (2, \*),  
S. Maouche (3, \*), H. M. Hussein (2, \*), and I. Korrat (4)

- <sup>1</sup>.EOST-IPGS - CNRS - UMR 7516, Strasbourg, France
- <sup>2</sup>.NRIAG, 11421 Helwan, Egypt
- <sup>3</sup>.CRAAG, Bouzareah, Algeria
- <sup>4</sup>.Mansoura University, Mansoura, Egypt

\* Also at *North Africa Group for Earthquake and Tsunami Studies (NAGET), Ne t40/OEA ICTP, Italy*

\*\**Corresponding author*

Submitted to *Natural Hazards and and Earth System Sciences (NHSS)*

Revised version June 2018

36

37 **Abstract.**

38 We study the sedimentary record of past tsunamis along the coastal area west of Alexandria  
39 (NW Egypt) taking into account the occurrence of major historical earthquakes in the eastern  
40 Mediterranean. The two selected sites at Kefr Saber (~32-km west of Marsa-Matrouh city)  
41 and ~10 km northwest of El Alamein village are coastal lagoons protected by 2 to 20-m-high  
42 dunes parallel to the shoreline. Field data were collected by: 1) Coastal geomorphology along  
43 estuaries, wedge-protected and dune-protected lagoons, and 2) identification of paleotsunamis  
44 deposits and their spatial distribution using five trenches (1.5-m-depth) at Kefr Saber and  
45 twelve cores (1 to 2.5-m-depth) at El Alamein. Detailed logging of sedimentary sections were  
46 analysed using X rays, grain size and sorting, total organic and inorganic matter, bulk  
47 mineralogy, magnetic susceptibility and radiocarbon dating necessary for the identification of  
48 past tsunamis records. Generally of low energy, the stratigraphic succession made of coastal  
49 lagoon and alluvial deposits includes intercalated high-energy deposits made of mixed fine  
50 and coarse sand with broken shells, interpreted as catastrophic layers correlated with tsunami  
51 deposits. Although the radiocarbon dating of 46 samples consist in mixed old (> 13000 year  
52 BP) and young (< 5500 year BP), dated charcoal and shells in sedimentary units allow the  
53 correlation with the 24 June 1870 (Mw 7.5), 8 August 1303 (Mw ~8) and 21 July 365 (Mw 8  
54 – 8.5) large tsunamigenic earthquakes that caused inundations in Alexandria and northern  
55 Egyptian shoreline. Our results point out the size and recurrence of past tsunamis and the  
56 potential for tsunami hazard over the Egyptian coastline and the eastern Mediterranean  
57 regions.

58

59 Key words: paleotsunami, coring, trenching, coastal geomorphology, northern Egypt

60

61

62 **1. Introduction:**

63 Egypt has a well-documented historical catalogue of earthquakes and tsunamis  
64 recorded in ancient texts and manuscripts. Original documents and archives from past  
65 civilizations are considered as the principal sources of macroseismic data for major historical  
66 earthquakes and tsunamis (Poirier and Taher, 1980; Maamoun et al., 1984; Ambraseys et al.,  
67 1994, 2009; Guidoboni et al., 1994, 2005; Soloviev et al. 2000, Tinti et al., 2001). The  
68 catalogue of Ambraseys et al., 2009 reports that coastal cities of northern Egypt have  
69 experienced repeated tsunamis inundations with severe damage in the past. While historical  
70 earthquakes and tsunamis are well documented, it appears that there is a lack of holistic  
71 investigations for tsunami deposits along the Mediterranean coastlines. The geomorphology  
72 along the Mediterranean coastline of northern Egypt with low-level topography (Hassouba,  
73 1995), dunes and lagoons constitutes an ideal natural environment for the geological record of  
74 past tsunamis.

75 The Eastern Mediterranean region experienced major earthquakes (with  $M_w > 7.5$ )  
76 mainly along the Hellenic subduction zone due to the convergence between the Eurasian and  
77 African plates (Fig. 1; Ambraseys et al., 1994, Taymaz et al., 2004). Major historical tsunamis  
78 in the eastern Mediterranean region that affected northern Egypt are triggered by large  
79 earthquakes (Papadopoulos et al., 2014) but the possibility of landslide tsunami associated  
80 with local earthquakes may also exist (El-Sayed et al., 2004; Tinti et al., 2005). Yalciner et al.  
81 (2014) estimated from modelling that up to  $500 \text{ km}^3$  landslide volume, with wave height  
82 ranging from 0.4 to 4 m, may have taken place offshore the Nile Delta. Coastal landslides  
83 may generate giant tsunamis as the Storrega event that hit Norway and the North Atlantic  
84 Ocean in ~6100 BC (Bondevik et al., 2012).

85 Tsunami research of the past 20 years has led to the discovery of coastal tsunami  
86 sedimentary records dating back to thousands of years. Among the early studies, the evidence  
87 of more than 6 soil levels buried below tsunami deposits 87 in the past 7000 years were found  
88 at Puget Sound coastline of Washington state (Atwater, 1987). Costa et al., 2014, studied the  
89 sedimentological records and related microtexture and heavy mineral assemblage for three  
90 events in Portugal in AD 1755, Scotland in 8200 calendar year BP and in Indonesia associated  
91 with the 2004 Sumatra earthquake. Sawai (2001) and Nanayama et al. (2003) recognized  
92 major tsunamis due to extensive coastal inundation along the eastern coast of Hokkaido  
93 (northern Japan); the repeated sand sheet layers several kilometres inland evidenced a 500-  
94 year tsunami cycle in the period between 2000 and 7000 years BP. Following the 2004  
95 Sumatra earthquake (Mw 9.1) and beside the coral reef uplift and subsidence (Meltzner et al;  
96 2009), Malik et al. (2015) identified in trenches three historical tsunamis during the past 1000  
97 years along the coast of South Andaman Island (India). Lario et al. (2011) document five  
98 tsunami events in the Gulf of Cadiz (Spain) generated by strong earthquakes in the last 7000  
99 years, previous to 1755 AD Lisbon earthquake tsunami. In the Mediterranean, De Martini et  
100 al. (2012) identified two tsunami deposits during the first millennium BC and another one in  
101 650-770 AD and estimated 385 year average recurrence interval for strong tsunamis along the  
102 eastern coast of Sicily (Italy). Minoura et al. (2000) described tsunami deposits with volcanic  
103 ashes along the coast in Crete (Greece) that correlate with Thera (Santorini) eruption in late  
104 Minoan time (1600–1300 B.C.). Papadopoulos et al. (2012) documented three paleotsunami  
105 layers attributed to the 1303, 1481 and 1741 historically documented tsunamis in Dalaman  
106 (SW Turkey). Using tested methodology as granulometry, XRD, XRF and FT-IR, Tyuleneva  
107 et al. (2017) identified two sedimentary events offshore Casearea (Israel) that may correlate  
108 with landslide tsunamis in AD 749 and in 5.7 ka BP (Chalcolithic cultural period).

109 In this paper, we investigate the high energy sedimentay deposits in the northern coast  
110 of Egypt and their correlation with the historical tsunami catalogue of the Eastern  
111 Mediterranean. Using coastal geomorphology with trenching and coring, we examine the  
112 geological evidence of tsunami deposits using textural, geochemical analysis, magnetic  
113 susceptibility and radiocarbon dating to identify the tsunamis records. We have analysed 120  
114 samples weighted 25 grams from core tubes every 15 cm for the geochemical analysis  
115 including grain size, bulk mineralogy and totally organic and inorganic matter. The magnetic  
116 susceptibility was measured every 3 cm in cores. The Bayesian simulation (Oxcal 4.2; Bronk-  
117 Ramsey, 2009) is applied to the radiocarbon results and stratigraphic succession of coastal  
118 deposits in order to generate a precise paleochronology of tsunami events.

119

## 120 **2. Major historical tsunamis of the Mediterranean coast of Egypt**

121 The tsunami catalogue of Egypt cites the work of Ambraseys (2005) that report  
122 several large historical tsunamigenic earthquakes with severe damage in the eastern  
123 Mediterranean regions (Table 1). Among these events, the tsunamis of 21 July 365, 8 August  
124 1303 and 24 June 1870 inundated the harbour of Alexandria city as well as the Mediterranean  
125 coast of Egypt.

126 Early in the morning of 21 July 365, an earthquake with estimated magnitude ~Mw 8-  
127 8.5 located offshore West of Crete generated a major tsunami that affected the eastern  
128 Mediterranean coastal regions (Ambraseys et al., 1994). The Roman historian Ammianus  
129 Marcellinus (Guidoboni et al., 1994) reported sudden shaking with occurrence of a “gigantic”  
130 wave toward the Mediterranean coastal areas. The tsunami wave generated great damage to  
131 the Alexandria harbour and city. The ships were drowning up to house roofs due to the effect  
132 of tsunami waves. As modelled by Hamouda (2009), the estimated wave height of this  
133 tsunami was larger than 8 m in Alexandria. The seismic source of this earthquake is located in

134 western Crete, according to archeological and historical damage distribution, combined with  
135 coastal uplift measurements and modelling (Fig. 1; Guidoboni et al., 1994; Stiros, 2001; Shaw  
136 et al., 2008 and Ambraseys, 2009).

137 On 8 August 1303 a major earthquake with magnitude ~Mw 8 located between Crete  
138 and Rhodes islands (Fig.1) generated a tsunami that greatly damaged the coastal cities of the  
139 eastern Mediterranean (Ambraseys, 2009, Papadopoulos et al. 2014). Abu-El Fida (1907)  
140 reported that the Alexandria city and Nile delta were flooded in 1329 and many houses were  
141 damaged in Cairo and northern Egypt. In Alexandria, part of the city walls collapsed, the  
142 famous lighthouse was destroyed and some ships were torn apart and (or?) carried up inland  
143 due to the tsunami waves (Abu-El Fida, 1907).

144 On 24 June 1870, a large earthquake affected many places of the eastern  
145 Mediterranean region and was felt in Alexandria at around 18 h with no damage in the city  
146 but with slight damage in Cairo (Ambraseys, 2009). In Alexandria coastline and Nile Delta,  
147 the sea waves flooded the docks of ports and inland fields (Coumbary, 1870). The epicentre  
148 location of this earthquake at eastern edge of Crete is inferred from damage in Heraklion and  
149 related shaking felt around the east Mediterranean (Fig. 1; Schmidt, J.F., 1879; Jusseret and  
150 Sintubin, 2017).

151 The AD 365 and AD 1303 were classified as very large earthquakes (with  $M_w \geq 8$ ;  
152 Stiros et al., 2001; Shaw et al., 2008; Hamouda, 2006, 2009) that generated major tsunamis  
153 with basin-wide impacts, while the 1870 earthquake was of a lower magnitude ( $M_w \sim 7 - 7.5$ ;  
154 Ben Menahem et al., 1991; Soloviev, 2000). Several studies of the 21 July 365 and 8 August  
155 1303 historical earthquakes with tsunami waves report inundation in Alexandria and  
156 coastlines of northern Egypt, and therefore with the potential of tsunami records in the  
157 sedimentary deposits. There have been some debates on the 1870 event location, size and the  
158 possibility of tsunami waves, but several authors (Soloviev et al., 2000; Ben Menahem et al.,

159 1979; Salamon et al., 2007; Papadopoulos et al., 2010; and Maramai et al., 2014) support the  
160 tsunami generation by 1870 earthquake.

161

### 162 **3. Coastal geomorphology and site selection for paleotsunami records**

163 The northwest Mediterranean coast of Egypt forms the northern extremity of the  
164 Marmarica plateau which is a Miocene homoclinal limestone that extends west of Alexandria  
165 for about 500 km (Sayed, 2013), acting as a major catchment area feeding the drainage system  
166 (Fig. 1). The plateau runs from the Qattara Depression southward to the piedmont plain  
167 northward with various elevations reaching ~100 m at Marsa Matrouh escarpment. The  
168 geomorphological landform of the study area is characterized by a 60-m-high northern plateau  
169 that includes ridges, sand dunes, lagoons, and rocky plains within a 20-km-wide strip along  
170 the coastline (Fig. 1). The rocky Pleistocene limestone ridges include a veneer of carbonate  
171 sand that are mostly composed of oolitic grains (Frihy et al., 2010).

172 The beach-dune ridge is developed along the receding Quaternary shorelines and  
173 embayment of the Mediterranean Sea (Hassouba, 1995). Coastal dune-ridges protect inner  
174 lagoons from the sea and constitute outstanding landform features at several locations parallel  
175 to the shoreline (Figs 2). When the sand dunes are removed they leave rocky headland  
176 outcrops (Abbas et al., 2008). The 2 to 20-m-high coastal beach-dune ridges mainly  
177 composed of oolitic and biogenic calcareous sand separates coastal lagoons and *sabkhas* (salt  
178 lake) from the sea. The lagoons with flat depressions separated from the sea by the coastal  
179 dunes (with different heights and sometimes with seawater outlets) are likely sites for the  
180 record of past tsunami deposits.

181 The accumulation of large boulders (Shah-Hosseini et al., 2016) near the selected sites  
182 is considered as a possible witness of past tsunami events. However, the boulders along the  
183 coastlines may either results from storms (Hall et al. 2006; Spiske et al. 2008) or tsunami

184 waves (Goff et al. 2006; 2009; Morhange et al. 2006). The imbricated surface observed in the  
185 large boulders near our investigated sites directed towards south direction. These boulders  
186 appear to be displaced by strong waves from the Mediterranean, and they are very similar to  
187 the tsunami boulders studied along the Algerian coastline (Maouche et al. 2009).

188 The discrimination between storm and tsunami deposits is a challenge in the  
189 Mediterranean regions (Maouche et al., 2009; Marriner et al., 2017). However, in comparison  
190 with the high frequency of storm events and possible related deposits (Lionello et al., 2006),  
191 the tsunami stratigraphic record is less recurrent (according to Tinti et al., 2001; Morton et al.,  
192 2007) and often presents a specific sedimentary signature of mixed deposits such as : 1) The  
193 basal contact of tsunami layer is extremely sharp with loadcast sedimentary structures where  
194 layers contain organic rich mud and vegetation (Matsumoto et al., 2008; Switzer and Jones  
195 2008); 2) the presence of rip up clasts that also suggest considerable erosion of lagoon and  
196 soil deposits usually associated with tsunami deposits (Szczuciński et al 2006); 3) as shown  
197 by the effect of 2011 Tohoku-oki earthquake tsunami in Hasunuma site and by the 2004  
198 Sumatra earthquake tsunami in Thailand (Matsumoto et al., 2016), tsunami deposits show  
199 general tendency of thinning landward; 4) concentration of heavy minerals assemblages in  
200 total sediments decreases in upward in the tsunami layer (Costa et al., 2014); 5) The low peak  
201 value of magnetic susceptibility linked to the amount of sand originated from the littoral  
202 dunes and reworked mixed sediments from tsunami waves (Font et al., 2010); 6) the large  
203 number of mixed broken bivalve shells and gastropods occupy vertical and horizontal  
204 stratigraphic positions due to high wave current (Donato et al., 2008); 7) the tsunami deposits  
205 tendency of being poorly sorted, with bimodal grain particle size as compared with the storm  
206 grain size which tends to be unimodal (Paris et al., 2007); 8) the saltwater inundation during  
207 tsunami event indicated by chemical analysis and used as evidence of paleotsunami waves  
208 (Chagué et al., 2011).



209           The local geomorphological and topographic settings contribute to the site selection  
210 for paleotsunami investigations. Our site selection for trenching and coring took into account  
211 the accessibility to dry lagoons (during summer season) in areas with no urbanization or  
212 artificially reworked soil. Suitable sites for trenching and coring are located in areas protected  
213 from the sea by the rather low (~2-m-high) sand dune topography that allows tsunami waves  
214 and related material to deposit into the lagoon. Two ~200 km apart sites of seasonal dry  
215 lagoons have met the selection criteria for paleotsunami investigation (Figs. 1 and 2): 1) Kefr  
216 Saber located at ~32-km west of Marsa-Matrouh city, and 2) El Alamein site at ~10 km  
217 northwest of El Alamein city and ~150 km west of Alexandria. Five trenches were dug at  
218 Kefr Saber (Fig 2a), and 12 cores were performed at the El Alamein site (Fig 2b).

219

#### 220 **4. Methods for paleotsunami investigations**

221           The trench size is typically ~2 x 1 meter with ~1.5-m-depth depending on the water  
222 table reach; all trench walls exposed fine-grained sedimentary layers that were logged in  
223 details. The conventional cores are arranged to be distributed in the lagoon area from  
224 depression to the outlet of sea water in order to observe the thickness variations of high  
225 energy sedimentary layers. The maximum core depth reached ~2.6 m.

226           The core tubes were split in half lengthwise, photographed using both normal and  
227 ultra-violet lightning accompanied by detail description of textures and sedimentary  
228 structures. An X-ray scanning was performed immediately after core opening and all cores  
229 were sent to the laboratory of the National Institute of Geophysics and Astronomy (NRIAG,  
230 Cairo) for sampling and further analysis. The magnetic susceptibility measurements were  
231 operated along cores and samples were collected for radiocarbon dating, physical, chemical  
232 and organic matter analyses.

233           The magnetic susceptibility was measured for cores every 3 cm at the NRIAG Rock  
234 Magnetism laboratory then corrected against air by using Bartington compatible software.  
235 120 samples were collected from cores every 15 cm for geochemical analysis with weighted  
236 25 gram, and then analysed for a) grain size analysis (the procedures include separating the  
237 weighed samples through a series of sieves (or screens) from 0.75 to 1000 microns. Statistics  
238 of the grain-size distribution were calculated using Folk and Ward (1957) to obtain mean  
239 grain-size and sorting of the sediments along the cores (see supplementary material, Tables S13 –  
240 S24 and Figs.S16-S27); b) bulk minerology (X-ray diffraction using a Philips PW 1730  
241 measurement). The intensity of the most intense diffraction peak of each mineral (see  
242 supplementary material, Tables S1-12 and Figs.S4-S15) was measured and the identification of  
243 crystalline substance and crystalline phases in a specimen is achieved by comparing the  
244 specimen diffraction spectrum with spectra of known crystalline substances (according to the  
245 International Centre for Diffraction Data - ICDD); c) The total organic and inorganic  
246 measurements were carried out at the laboratory of Central Metallurgical Research &  
247 Development Institute (CMRDI at Eltebbin, Egypt).

248           Three laboratories (Poznan laboratory in Poland, CIRAM in France and Beta  
249 Analytical laboratory in USA) did the radiocarbon AMS dating of samples in order to ensure  
250 quality of results (see Tables 2 a and b). The collected samples are made of charcoal, bones,  
251 gastropods, shells and organic matter. The radiocarbon dating results of samples are  
252 subsequently corrected using a recent calibration curve (Reimer et al., 2013) and the Oxcal  
253 software (Bronk-Ramsay, 2009) for the probability density function with  $2\sigma$  uncertainty for  
254 each dated sample. In addition, from a succession of calibrated dates, a Bayesian analysis  
255 provides the simulated age in probability density function of a catastrophic event. The  
256 simulated age allows the correlation between the high energy sedimentary deposits, the  
257 related isotopic chronology and the historical tsunami events in catalogues.

258 **5. Description of sedimentary layers in trenches and cores with C14 dating results**

259 The selected sites revealed a succession of sedimentary units typical of lagoon  
260 deposits with fine strata made of a mix of fine gravel, sand, silt and clay (Salama, 2017). At  
261 both Kefr Saber and El Alamein sites, trenches and cores present comparable soft sediment  
262 content and stratigraphy. The variation of sediments content in the different cores is due to the  
263 distance from the shore and to the core location in the lagoons with regard to dunes heights. A  
264 detailed description of the trenches and cores at both Kefr Saber and El Alamein sites is  
265 presented here below:

266 **5. 1. Kefr Saber site:** Trenches P1, P2, P3 and P4 are 40 to 154 meters distance from  
267 shoreline, have quite similar sedimentary succession with fine-grained mostly alluvial  
268 deposits made of sandy-silty layers with mixed coarse and white fine sand that contains  
269 broken shells of marine origin (Fig. 3 and trench logs in supplemental material S1). A  
270 conspicuous layer of white mixed sand, gravel and broken shells with variable 2 to 15 cm  
271 thicknesses is found at 25 – 55 cm below surface in P1, P2, P3; its thickness decreases  
272 landward to 1 cm in P4 (see supplemental material S1 a, b, c, d, e). Trench P5 which is close  
273 to the dunes and shoreline shows a succession of coarse and fine sand, and 30 to 40 cm thick  
274 mixed with pebbles which, as observed in other trenches, are fining inland.

275 The mixed radiocarbon dating of samples in trenches is an issue at Kefr Saber. Two  
276 charcoal samples collected in Trench P1 at 35 cm and 53 cm depth yield modern age (younger  
277 than 1650 AD) and 39000-38250 BC, respectively. In Trench P3, two other charcoal samples  
278 collected at 73 cm and 100 cm below surface and both below the high energy sedimentary  
279 layer labelled 1 (Fig. S1-b) indicate 50 - 70 AD and 5300-5070 BC, respectively (see also  
280 Table 2a). In Trench P4, four charcoal samples collected at 15 cm, 25 cm, 40 cm and 61 cm  
281 depth reveal modern ages (younger than 1650 AD). A fifth charcoal sample recovered at 60  
282 cm below surface provides 17200- 15900 BC. In Trench P5, four charcoal samples are

283 collected with the uppermost sample located at 12 cm depth is dated at 360-50 BC, the second  
284 sample at 17 cm depth show 30- 180 AD, the third, and fourth charcoal samples found at 33  
285 cm and 37 cm depth are dated at 350 - 1050 BC and 2400-4000BC, respectively. The mixing  
286 of old (older than 7000 years BP) and relatively young ages (younger than 2000 years BP)  
287 points to reworked of former deposits and redeposit on a lagoon.

288 **Results:** Although the sedimentary deposits in trenches at Kefr Saber indicate mixed  
289 and reworked sedimentation, the well identified coarse and fine white sand layer with broken  
290 shells of marine origin located between 25 and 55 cm depth in all trenches P1 to P4 suggests  
291 a single homogeneous sedimentary unit of relatively young age deposited in the lagoon.  
292 Considering the deposits of neighboring trenches at Kefr Saber, and their relative sedimentary  
293 chronology of units deposited in the same lagoon as comparable, and taking into the possible  
294 reworked deposits that may include older ages, we selected the radiocarbon dates younger  
295 than 2000 year BP that bracket the white sandy layer unit (i.e., samples TSU P5 S4 and S5,  
296 TSU P3 S1 and S3 that predate the unit, and sample TSU P3 S2 that postdates the unit).

297 **5. 2. El Alamein site:** The 12 cores extend between 1 m and 2.6 m depth and except,  
298 for cores 1 and 9 which are shown in Figures 5 a and b, the detailed stratigraphic logs and  
299 related measurements are presented in the supplemental material S2. In a previous  
300 reconnaissance field investigation, a coarse and fine white sand layer was identified at ~ 30  
301 cm below surface in a test pit. Two charcoal samples El Al sa1 and El Al sa2 collected at 25  
302 cm and 56 cm depth give 1680-1908 AD and 1661-1931 AD ages, respectively. The  
303 description of cores is as following:

304 **Core 1:** This core is located at ~166 m from the shoreline (Fig. 2 b), east of the study area  
305 behind the sand dunes and near the outlet of the seawater. The core depth reached a depth of  
306 ~2.14 m and the stratigraphic section includes 3 high energy sedimentary layers recognized as  
307 following (Fig. 5 a section 1 and its continuation at depth in Fig. S2-1):

308 The first layer located at ~12.5 cm depth, ~34.5 thick, is made of brown clay fine grained  
309 sediments, poorly sorted, with low peak in magnetic susceptibility, rich in organic matter, and  
310 X-ray image reflects clear lamination. The second layer which is located at ~70 cm depth has  
311 ~5 cm thickness, characterized by highly broken shells fragments with the very poor sorting  
312 of sediments granulometry. The third layer at ~75 cm depth is ~22 cm thick, made of pale  
313 yellow sand with poor sorting of sediments size, and a high peak in magnetic susceptibility.  
314 The chemical analysis shows the presence of gypsum and minor goethite, and X-ray scanning  
315 shows some turbiditic current structures with rip clasts, cross bedding and laminations. A  
316 fourth high energy sedimentary layer is identified at 158 cm (see Fig. S2-1; section 2). It is  
317 characterized by pale brown silty clay, with broken shell fragments and extremely poor  
318 sorting, and with a high peak of magnetic susceptibility at the base of the layer.

319 Two samples were collected for radiocarbon dating from core 1. The first and  
320 uppermost sample is a charcoal fragment at 40 cm below surface located within a layer of  
321 catastrophic mixed sedimentary unit characterized by poor sorting, highly broken shell  
322 fragments and the low peak value of magnetic susceptibility.

323 **Core 2:** As shown in (Fig.S2-2), the core 2 is ~90 cm deep, located at ~264 m from the  
324 shoreline (Fig. 2 b). Two penetrated high energy sedimentary layers are identified. The first  
325 layer is a ~12 cm thick brown clay sediments, at ~13 cm depth, mixed with gravel and sand.  
326 The layer is rich in organic matter (> 1), with a small peak of magnetic susceptibility and  
327 where the geochemical analysis shows a minor component of goethite. The second layer at  
328 ~50 cm depth is ~15 cm thick, made of mixed yellow sand with silty-clay pockets, broken  
329 shells fragments, poor sorting and with low peak magnetic susceptibility. It is rich in organic  
330 matter comparing to the other layer, and the geochemical analysis shows minor amounts of  
331 halite.

332 Several samples were collected below and above the high energy sedimentary layers  
333 but, unfortunately, their content did not deliver enough carbon for dating. The two shells  
334 (gastropod) samples collected at 75 cm and 77 cm depth (well below the lowermost high  
335 energy sedimentary layer, Fig.S2-2) have calibrated dates 32971-34681 and 34362-36931 BC,  
336 respectively (Table 2b). These obtained ages may well be due to a mixed and/or reworked  
337 sedimentation.

338 **Core 3:** This core located at 270 m from the shoreline, has revealed three high energy  
339 sedimentary layers near the outlet (lowland between high dunes) that allow tsunami wave  
340 inundation (Fig. 2b and Fig. S2 – 3). The first layer is at ~25 cm depth and corresponds to a  
341 26 cm thick pale brown clay characterized by broken shells fragments and sediments rich in  
342 organic matter. The second layer at ~70 cm depth is 17.5 cm thick characterized by white  
343 sand laminated at the top with a low peak of magnetic susceptibility, and with high organic  
344 matter > 2 % of dry weight. The third layer at 106 cm below surface is 32 cm thick,  
345 characterized by yellow sand with minor illite and broken shells fragments.

346 Two shell samples were collected for dating at 37 cm and 45 cm depth and have  
347 calibrated dates 43618 BC and 34218-37224 BC respectively (Fig.S2-3 and Table 2b). These  
348 two samples are located within the stratigraphic high energy sedimentary layer 2 and may  
349 correspond to reworked sediments due to the high energy sedimentation during the  
350 catastrophic event.

351 **Core 4:** The core is located at 435 m from the shoreline and shows sedimentary units where  
352 we identify two high energy sedimentary layers with low magnetic susceptibility (Fig. S2 - 4).  
353 The first layer is the white sand at ~12.5 cm depth 7 cm thick with poorly sorted sediments,  
354 broken shells fragments with organic matter ≥ 2 % of dry weight of total sediment fraction.  
355 The second layer is pale yellow sand at ~102 to 130 cm depth, characterized by broken shell  
356 fragments in a yellow sand with a minor amount of illite and gypsum.

357 One shell sample collected for dating at 37 cm depth provides a calibrated date at  
358 32887-34447 BC (Table 2b). This sample located in the stratigraphic high energy sedimentary  
359 layer 1 apparently results from high energy reworked sedimentation during the catastrophic  
360 event (Fig. S2-4).

361 **Core 5:** The core is the southernmost in the El Alamein site, located at 490 m distance from  
362 the shoreline (Fig. 2 b; Fig. S2 - 5). The core reaches a depth of 73 cm and the sedimentary  
363 succession does not show any possible catastrophic sedimentary layer of high energy  
364 sedimentary origin. According to its content, core 5 may show the limit of inundation area  
365 with respect to at least the first and second high energy sedimentary layers.

366 **Core 6:** This core is located south of the sand dunes at 320 m from the shoreline (Fig. 2 b). It  
367 is characterized by three high energy sedimentary layers (Fig. S2 - 6). The first layer is a ~24  
368 cm thick pale yellow sand with broken shells fragments (between 5 and 26 cm depth) and  
369 poorly sorted sediments rich in organic matter (larger than 2.5). The second layer is ~18.5 cm  
370 thick at 50 - 75 cm depth characterized by yellow sand with mixed gastropods and bivalves,  
371 and a high value of magnetic susceptibility at the base of the layer. The third layer at 130 cm  
372 depth is ~20 cm thick, rich in organic matter, characterized by white sand mixed with gravel  
373 and pebble and bioclasts.

374 Three samples were collected for dating in core 6. The first sample is a gastropod shell  
375 at ~45 cm depth and shows 35002-37441 BC calibrated dates. The second and third samples  
376 are coral fragments at ~60 cm and ~80 cm depth that gave 42776-69225 BC and modern  
377 (younger than 1650AD) calibrated ages. The first sample is above the high energy  
378 sedimentary layer 2 while the second sample was within the stratigraphic high energy  
379 sedimentary layer 2 (Fig S2-7). These samples may result from mixed sedimentation and  
380 reworking due to high current waves.

381 **Core 7:** This core was located at 273 m from the shoreline (Fig. 2 b). It is characterized by  
382 sedimentary units that may include three high energy sedimentary layers within 120 cm core  
383 depth (Fig. S2 - 7). The first layer is a 6 cm thick brown sand with broken shell fragments at  
384 ~14 cm depth and a considerable amount of cement gypsum with a minor amount of Illite and  
385 goethite. It is rich with organic matter (> 2) of a swampy environment and the noticeable peak  
386 of magnetic susceptibility. The second layer at 50 cm depth is 20 cm thick, characterized by  
387 laminated pale brown clay mixed with gravel and pebbles at the bottom. The third layer is 15  
388 cm thick at 115 cm depth characterized by white sand, poor sorting sediments with a minor  
389 amount of pyrite.

390 A single sample of shell fragment collected at 17 cm depth for radiocarbon dating  
391 within high energy sedimentary layer 1 provides an age 293-1113 BC.

392 **Core 8:** This core is located at 214 m from the shoreline (Fig. 2 b). Three high energy  
393 sedimentary layers are recognized (Fig.S2 - 8). The first layer is a 16 cm thick pale yellow  
394 silty clay at ~14 cm depth, rich in organic matter, with minor amount of goethite and bioclasts  
395 rich. The second layer is a 22 cm thick at ~52 cm depth, of pale yellow silty-clay with broken  
396 shells, characterized by a high peak of magnetic susceptibility and rich inorganic matter  
397 (>2.5). The third layer is 9 cm thick at ~128 cm depth, characterized by pale yellow sand with  
398 broken shell fragments and poorly sorted angular gravel sized clasts. No samples were  
399 suitable for dating in this core.

400 **Core 9:** The core is located at 130 m from the shoreline. Three high energy sedimentary  
401 layers are recognized (Fig. 5 b; Fig. S2 - 9). The first layer is white sand at ~16 cm depth and  
402 13 cm thick with a high content of organic matter and rip up clasts that appear in X-ray  
403 scanning characterized by highly broken shell fragments and rich in organic matter. The  
404 second layer at 67 cm depth is 22 cm thick characterized by white sand, with a peak of  
405 magnetic susceptibility, high content of organic matter larger than 5. The third layer at 139 cm



406 depth is 14 cm thick characterized by broken shell fragments and white sand with highly  
407 angular sediments that reflect the poor granulometric sorting.

408 Two samples were collected for dating in core 9. The first sample is a gastropod shell  
409 located at 24 cm depth within the high energy sedimentary layer 1 and gives a 1052-1888 BC  
410 calibrated age. The second sample at 55 cm depth is a bivalve (lamellibranch) located above  
411 the high energy sedimentary layer 2 dated at 40521-43169 BC calibrated age.

412 **Core 10:** The core is located at 245 m from the shoreline (Fig. 2 b). Three high energy  
413 sedimentary layers are recognized (Fig. S2 - 10). The first layer is 9 cm thick brown silty clay,  
414 at ~19 cm depth with broken shells fragments, rich in organic matter (> 4) and high peak of  
415 magnetic susceptibility; rip up clasts and laminations appear in X-ray scanning. The second  
416 layer 38 cm thick brown sand at 48 cm depth with broken fragments of shells, peak of  
417 magnetic susceptibility and high organic matter (> 1.5) at the bottom of the layer. The third  
418 layer is 28 cm thick pale yellow sand at 101 cm depth. It is characterized by rich organic  
419 matter and poor sorting sediments.

420 Two samples were collected for dating in core 10. The first sample located in the high  
421 energy sedimentary layer 1 is a shell fragment at 24 cm depth that gives 2623-3521 BC  
422 calibrated age. The second sample located in the high energy sedimentary layer 2 is a rodent  
423 bone at 70 cm below surface with estimate age of 41256-46581 BC calibrated age (see also  
424 Table 2b).

425 **Core 11:** The core is located at 151 m from the shoreline (Fig. 2 b). Three high energy  
426 sedimentary layers are recognized (Fig.S2 - 11). The first layer is 10 cm thick white sand with  
427 broken shell fragments at ~19 cm depth; the layer also shows high magnetic susceptibility,  
428 rich organic matter (> 4) with a high percent of gypsum (>50%). The second layer is 9 cm  
429 thick white sand at 76 cm depth, with broken shell fragments, a high peak of magnetic  
430 susceptibility and organic matter larger than 1.5. The third layer is 21 cm thick grey silty sand,

431 with broken shell fragments at 107 cm depth; poor sorting, high organic rich matter and a  
432 minor amount of Illite and gypsum.

433 Eight samples were collected for dating in core 11. The sedimentary units at 112 - 175  
434 cm depth (core bottom) and related succession of ages between 3943 BC and 2475 BC (from  
435 shell gastropods and a charcoal fragment; see Table 2 b), may indicate a consistent dating of  
436 the high energy sedimentary layer 3. However, the first sample (gastropod shell) at ~20 cm  
437 depth that gives 3638-4328 BC, the second sample (broken shell) at 62 cm depth with an age  
438 at 17869 - 18741 BC, and the 33294 – 36120 BC and 2619 – 3386 BC out of sequence dating  
439 (Table 2 b).

440 **Core 12:** The core is located at 127 m from the shoreline (Fig 2 b). Four high energy  
441 sedimentary layers are recognized in section 1 and one high energy sedimentary layer in  
442 section 2 (Fig. S2 – 12 a, b). The first layer is ~7.5-cm-thick at ~19-cm-depth and is made of  
443 poorly sorted white sandy deposits, and highly broken gastropods and lamellibranch fossils.  
444 The layer is characterized by high value of organic matter and low peak magnetic  
445 susceptibility. The second layer is ~13-cm-thick white sandy deposits intercalated with coarse  
446 brown sand at ~32.5-cm-depth, characterized by horizontal lamination, poor sorting  
447 sediments, rich in organic matter and high peak of magnetic susceptibility. The third layer is  
448 ~25-cm-thick grey sandy clay at 89-cm-depth, with laminations at the bottom of deposits,  
449 vertically aligned gastropods, broken shells fragments, rich in total organic matter and a low  
450 peak of magnetic susceptibility. A fourth high energy sedimentary layer of medium to fine  
451 pale yellow sand, with broken shells fragments, is identified in section 2 (Fig. S2 – 12 b) at  
452 151 cm depth. It is characterized by poor sorting, low peak of magnetic susceptibility, a large  
453 amount of organic matter (> 5.5) and high amount of gypsum.

454 Five samples were collected for dating in core 12. In core section 1, the first sample is  
455 a gastropod found at 44 cm depth that gives an age of 3367-3366 BC. The second sample is a

456 shell found at 108 cm depth and shows an age of 3097-3950 BC (Table 2 b). The third sample  
457 is a gastropod found at 114 cm depth dated at 3331-4050 BC. The fourth and fifth samples in  
458 core section 2, sample are gastropod shells found at 117 cm and 135 cm depth with calibrated  
459 age 39560- 40811 BC and 3365-4071 BC, respectively (Table 2 b). The fourth sample is off  
460 sequence with respect to the other samples and may result from sediment transport and  
461 reworking due to high energy waves. The other samples are in sequence from 4071 to 2457  
462 BC age, comparable to the sedimentary succession of core 11.

463 **Results:** The sedimentary deposits in the El Alamein lagoon also result from  
464 intercalated high-energy marine deposits into low energy marine and alluvial deposits with  
465 reworked sedimentation. A first observation in almost all cores is the existence of the white  
466 sand layer with broken shells of marine origin located ~ 10 cm to 170 cm depth in El Alamein  
467 site, and the identified three to four high energy sedimentary layers.

468

## 469 **6. Summary of results from trenching and coring**

470 The cores and trenches in both Kefr Saber and El Alamein sites expose three main  
471 layers characterized by fine and coarse sand mixed with bioclasts. We assume that indicate  
472 the occurrence of high energy and catastrophic sedimentary deposits in the coastal lagoon  
473 environment (Figs. 2 a, b, and c, and Fig. 3). Although the two studied sites are ~200 km  
474 apart, a white sandy layer with broken shells is found in all trenches (see Fig. 3 and  
475 supplemental material S1 a, b, c, d, e) and cores (except for core 5, see Figs. 5 a and b, and  
476 supplemental material in Fig. S2 – 1 to 12). The recurrent white sandy deposits in trenches  
477 and cores are well visible as coarse sand units mixed with gravel and broken shells that  
478 become finer-grained and thinner landward (see trench P4, Fig. 3) or disappear when distant  
479 from the shore (core 5, Fig. S2 –5). The high energy sedimentary characteristics with four

480 layers in the ~ 2 m thick sedimentary units suggest that these layers are tsunami deposits  
481 rather than storm.

482 In most cores (Figures. 5 a and b, and supplemental material Fig. S2 – (1 - 12), the  
483 first tsunami layer is ~7.5-cm-thick at ~19 cm-depth and is made of poorly sorted white sandy  
484 deposits with broken gastropods and lamellibranch (shell) fossils. This layer is characterized  
485 by bi-modal grain size distribution with high value of organic matter and low peak of  
486 magnetic susceptibility with a rich content in carbonates and quartz. Goethite and pyrite  
487 heavy minerals were found in the cores at the base of layer 1, which also contains rip up clasts  
488 from underlying sediments. The second layer is ~13-cm-thick at ~32.5-cm-depth  
489 characterized by white sandy deposits intercalated with laminated coarse brown sand, very  
490 poor sorting of sediments, rich in organic matter and with a low peak of magnetic  
491 susceptibility. Pebbles are found at the base of this layer which reflects a loadcast sedimentary  
492 structure. A considerable amount of heavy minerals like goethite and pyrite can be found in  
493 this layer. The third layer is ~25-cm-thick at ~89-cm-depth is made of grey sandy clay, with a  
494 high peak of magnetic susceptibility, laminations at the bottom of deposits, vertically aligned  
495 gastropods, broken shell fragments, and rich in total organic matter. In all three layers, the  
496 poorly sorted sediments and organic content are greater than 5 % of dry weight in the high  
497 energy deposits and tsunami records. These characteristics at the El Alamein site lead us to  
498 interpret the three sedimentary layers as tsunami deposits. The tsunami layers and their  
499 catastrophic content are identified in photography and X-rays, magnetic susceptibility,  
500 organic/mineral content and by the existence of mixed coarse and fine sand with broken  
501 marine shells. A main difficulty, however, is the age determination of the tsunami layers due  
502 to the mixed radiocarbon dates that can be ranged in old and young ages, between 50000 year  
503 BP - 13430 year BP, and 5065 year BP - 125 year BP, respectively, in all cores .

504 In a synthesis of all dated units in trenches and cores in Figures 4 and 6, the  
505 sedimentary succession of low energy lagoon and marine and alluvial deposits intercalated  
506 with high-energy deposits provides evidence for the identification of four tsunami deposits at  
507 Kefr Saber and El Alamein sites. In the case of Kefr Saber trenches, the dating of charcoal  
508 fragments allows to bracket of a tsunami event with a simulated age between AD 137 and AD  
509 422, which includes the AD 365 western Crete earthquake (Figs. 4 and Table 2 a). The dating  
510 of sedimentary units at the El Alamein site turned out to be more complex due to highly  
511 reworked sedimentation and significant mix of old (> 13000 year BP) and young ages (< 5500  
512 year BP; Table 2 b). Using the latter ages, the radiocarbon dating (including the Oxcal  
513 Bayesian analysis) of shells, bone and charcoals fragments at El Alamein site (Fig. 6) results  
514 in a sequence of ages that allow to bracket of an event W between 1434 BC and 1126 BC, and  
515 event X between AD 48 and AD 715, and event Y between AD 1168 and AD 1689, and an  
516 event Z between AD 1805 and AD 1935 (Figure 6). The three most recent simulated dates of  
517 tsunami events X, Y and Z might correlate with the seismogenic tsunamis of AD 365, AD  
518 1303 and AD 1870 reported in catalogues (Table 1).

519 In the north of the trench sites at Kefr Saber, the dating of shells Dendropoma (worm  
520 snails) of common species Dendropoma petraeum and Vermetus triquetrus of a sample  
521 collected in a large boulder Long: 26° 55.154 and Lat.: 31° 26.385 provide a radiocarbon  
522 calibrated date of 940-1446 AD. The dating of Dendropoma collected in a boulder often  
523 marks the catastrophic coastal environmental change with displaced large boulders from an  
524 intertidal to shoreline position due to a tsunami event. The Dendropoma sample age at Kefr  
525 Saber may correlate with the 8 August 1303 earthquake and tsunami event that dragged large  
526 boulders on the shoreline in agreement with the results of Shah-Hosseini et al. (2016).  
527 However, we could not identify the 1303 event in the trenches dug in the nearby lagoon at  
528 Kefr Saber.

529

## 530 **Discussions and Conclusions**

531 The identification of high energy sedimentary layers considered as tsunami deposits  
532 within the stratigraphic layers and results of radiocarbon dating allow us to identify four  
533 tsunami events (Figs. 4 and 5). The historical seismicity catalogue of the Eastern  
534 Mediterranean reported two significant tsunamigenic seismic events of the Hellenic  
535 subduction zone that affected the Mediterranean coast of Egypt: 1) The 21 July 365  
536 earthquake (Mw 8.3 – 8.5; Stiros and Drakos, 2006; Shaw et al., 2008), 2) the 8 August 1303  
537 earthquake (Mw 7.8 – 8.0; Abu Al Fida, 1907; Ambraseys, 2009). A third tsunami event is  
538 also reported during the 24 June 1870 earthquake (Mw 7 - 7.5), but despite some debates on  
539 its occurrence, the inundation of the Alexandria harbour leaves no alternative on the tsunami  
540 waves on the Egyptian coastline (see section 2).

541 In our study, the distinction of tsunami sedimentary records from storm deposits is  
542 based on: 1) The record of the small number (3 to 4) layers while storm deposits controlled by  
543 seasonal climatic catastrophic events should have been more frequent (Lionello et al., 2006;  
544 Morton et al., 2007). 2) The existence of white sand sheet layers with broken shells at two  
545 sites (Kefer Saber and El Alamein) located ~200 km apart, bearing comparable age, structure  
546 and texture. This is a probable large tsunami. 3) The existence of organic rich clasts in sand  
547 sheets of some cores which indicates a catastrophic event with sufficient energy to break and  
548 erode the coastal barrier made of the shoreline rocky headlands, organic sediments and coastal  
549 dunes before reaching the lagoons. 4) The bimodal distribution of the grain size of sandy  
550 sedimentary units that include a large proportion of broken shell comparable to that of  
551 tsunami deposits (Scheffers and Kelletat, 2003). 5) The correlation between the simulated  
552 ages of tsunami layers from the radiocarbon dating and the large historical tsunamigenic  
553 earthquakes of the eastern Mediterranean (Figs. 4 and 6). 6) The high energy fining inland

554 sedimentary sequence observed in trenches and cores which is related to tsunami deposits  
555 rather than storm deposits. 7) The consistent depth of tsunami layers in cores of the El  
556 Alamein site (Fig. 7).

557 The magnetic susceptibility measurements along the cores are normally having low  
558 peak value (values near surrounded the zero value). It reflects a tsunami layer because it  
559 contains more carbonates and quartz than the underlying sediments. This rule are not coincide  
560 all the cores due to presence of 0.91 -14.9 % of goethite and 1.3 - 21.02 % of pyrite iron  
561 oxides minerals. The value of the peak increase slightly above the zero value and reach 20-  
562 100 X 10<sup>-6</sup> of magnetic susceptibility and this increase happen usually on the bottom of the  
563 tsunami layer.

564 As the sedimentary units in the 1 m to 2.6 m depth cores result from young deposition  
565 processes with high-energy marine units intercalated into low energy marine and alluvial  
566 deposits, we consider the radiocarbon dating older than 13430 year BP as a result of  
567 reworking of older rocks. Considering that the succession of 2.6 m uppermost deposits and  
568 related stratigraphic chronology are comparable in all cores in the El Alamein lagoon, we  
569 select the radiocarbon dates younger than 5500 year BP as representative of the recent  
570 sedimentary units that include tsunami layers. Using the radiocarbon dating of samples and  
571 related selected young ages, the sedimentary sequence of catastrophic layers and their ages  
572 obtained from the Bayesian simulation (Oxcal 4.2; Bronk-Ramsey, 2009) allow a correlation  
573 with the AD 365, AD 1303 and AD 1870 tsunamigenic earthquakes of the east Mediterranean  
574 Sea (Fig. 6). Hence, the dating of the three high energy sedimentary layers deposited along  
575 the Egyptian coastline at Kefr Saber and El Alamein sites correlate with the historically  
576 recorded seismogenic tsunamis of the Hellenic subduction zone. In addition, a fourth tsunami  
577 layer can be identified between 1126 BC and 1434 BC.

578           The lagoon sedimentary environment is a natural site of mixed and reworked marine  
579 and continental deposits, with a significant erosion during major tsunamis that may explain  
580 the mixed radiocarbon dates (Tables 2 a and b). The mixing of old (older than 7000 years BP)  
581 and relatively young ages (younger than 2000 years BP) points to reworked of former  
582 deposits and redeposit on a lagoon environment. The apparently incoherent dating may result  
583 from: 1) The different type of samples used in radiocarbon dating as charcoal, shell, bone and  
584 root (see Tables 2 a and b), and uncertainties that also result from different species of  
585 mollusks, and/or the reservoir effect; 2) the old events as a result of eroded or transported  
586 deposits of previous tsunami or storm waves, which is difficult to evaluate since we found  
587 that the stratigraphic record of these high-energy events is probably incomplete or  
588 underestimated (Tables 2 a and b where among 30 samples 12 dated samples are > 30 ka).

589           Indeed, by considering the mixed sedimentation of reworked deposits intercalated with  
590 new units, our selection of samples younger than 2000 year BP at Kefr Saber, and younger  
591 than 5500 year BP at El Alamein allowed us to distinguish between old and new isotopic  
592 dating and infer a consistent chronology of tsunami deposits. For instance at the El Alamein  
593 lagoon, the clear separation between old (50000 year BP to 13430 year BP) and young (5065  
594 year BP - 125 year BP) radiocarbon dating, with no intermediate dates of sedimentation,  
595 confirms the different origin and processes of deposition. The radiocarbon dating indicates  
596 that the white sand and coarse mixed layers represent deposits that may result from tsunami  
597 events in 365, 1303 and 1870 (see Table 1). The first two events correlate with large  
598 earthquakes with  $M_w \geq 8$  with well documented tsunami waves in the historical sources. The  
599 existence of the 365 tsunami seems to be widely recorded through widespread massive  
600 turbidities of the eastern Mediterranean region (Stanley and Bernasconi 2006; Polonia et al.,  
601 2016). The four recognized catastrophic layers in trenches and cores have physical and  
602 chemical characteristics that correlate with high energy environmental conditions of tsunami



603 deposits. The four low magnetic susceptibility peaks of the four deposits also correlate with  
604 the high content of organic carbon matter and carbonates.

605 The record of past tsunami deposits along the Egyptian Mediterranean coastline is  
606 favored by the low topography and platform geomorphology. The coastal environment with  
607 similar lagoons and dunes with large areas with relatively flat morphology allowed the  
608 deposits of catastrophic marine deposits intercalated within alluvial deposits. The lagoon  
609 shapes elongated along the shoreline at Kefr Saber and El Alamein sites explain the similarity  
610 between the sedimentary units and the tsunami deposits. The correlation between the core  
611 deposits at El Alamein and trench deposits at Kefr Saber is marked by the dating of tsunami  
612 deposits and the correspondence one of them with the AD 365 earthquake. The succession of  
613 sudden high-energy deposits with low energy and slow sedimentation may include reworked  
614 units that imply a disorder in the chronological succession. Although the results of dated  
615 shells may be suspicious (due to the unclosed mineralogical system), their reliability is tested  
616 with the comparison of nearby radiocarbon dating.

617 The size of past tsunamis can be compared with the thickness of catastrophic  
618 sedimentary units in trenches at Kefr Saber and core units of the El Alamein site. It appears  
619 that the tsunami deposits of the AD 365 tsunamigenic earthquake are thicker at Kefr Saber  
620 site than at the El Alamein site. In contrast, the thickness of sedimentary layers of the AD  
621 1303 and AD 1870 are thicker at the El Alamein site. These results on the identification of  
622 past tsunamis and their repetition along the coastlines in Egypt and North Africa are decisive  
623 for the tsunami wave propagation and hazard models in the East Mediterranean Sea (Salama,  
624 2017).

625

626

627

## 628 **Acknowledgments**

629 We are grateful to Prof. Hatem Odah and NRIAG administration, and staff for their keen  
630 efforts and help during the development of this work. We are grateful to the North African  
631 Group for Earthquake and Tsunami studies (NAGET) and Drs. Assia Harbi, Adel Samy,  
632 Hany Hassen, Mohamed Maklad, Mohamed Sayed for support and discussions. We are  
633 grateful to the “*Centre d'Etudes Alexandrine*” for the lending of the COBRA instrument for  
634 coring. We address our special thanks to the Egyptian Armed Forces for issuing permissions  
635 and their support during field work. This research programme is conducted with the funding  
636 support of the ASTARTE EC project (Assessment, Strategy And Risk Reduction for  
637 Tsunamis in Europe - FP7-ENV2013 6.4-3, Grant 603839), the French-Egyptian IMHOTEP  
638 project, and the Academy of Scientific Research and Technology of Egypt.

639

## 640 **Supplementary data**

641

642 Supplementary data associated with this manuscript are:

- 643 ▪ Figures S1 a, b,c, d and e of five trench logs of Kefr Saber site (trench P4 as Fig. 3).
- 644 ▪ Figure S2 – 1 (section 2) to 10 of core descriptions of El Alamein site (cores 1 and 9 as  
645 Figs a and b).

646

647

## 648 **References**

649 Abbas, M.S., El-Morsy, M.H., Shahba, M.A. and Moursy, F.I.,: Ecological studies in coastal  
650 sand dune rangelands in the North-West of Egypt, Meeting of the Sub-network on  
651 Mediterranean Forage Resources of the FAO-CIHEAM Inter-regional Cooperative  
652 Research and Development Network on Pastures and Fodder Crops, Spai: , 389–393,  
653 2008.

654 Abu al-Fida Ismail Ibn Hamwi (born 1273 – died 1331). : The Concise History of Humanity  
655 or Chronicles (in Arabic '**Tarikhu 'al-Mukhtasar fi Akhbar al-Bashar' in 1329**). Al-  
656 Husayniyah Press, Cairo, 2 volumes , 1112 p., 1907.

657 Ambraseys, N.N., Melville, C.P. and Adam, R.D.: The seismicity of Egypt, Arabia and Red  
658 Sea: A Historical Review, Cambridge University Press, 181 p., 1994.

659 Ambraseys, N.N., Melville, C.P. and Adams, R.D.: The seismicity of Egypt, Arabia and the  
660 Red Sea: a historical review. Cambridge University Press, 181p., 2005

661 Ambraseys, N.: Earthquakes in the Mediterranean and Middle East: A Multidisciplinary  
662 Study of Seismicity up to 1900, Cambridge University Press, 947 p., 2009.

663 Atwater, B.: Evidence for great holocene earthquakes along the outer coast of Washington  
664 state, *Science*, 236, 942 – 944, 1987.

665 Bondevik, S., S.K. Stormo, and G. Skjerdal.: Green mosses date the Storegga tsunami to the  
666 chilliest decades of the 8.2 ka cold event. *Quaternary Science Reviews* 45, 1–6, 2012

667 Ben Menahem, A.: Earthquake catalogue for the Middle East (92 B.C. to 1980 A.D.)  
668 *Bollettino di Geofisica Teorica ed Applicata*, 21, 245-310, 1979.

669 Ben Menahem, A.: Four thousand years of seismicity along the Dead Sea rift, *Journal of*  
670 *Geophysical Research*, 96, 195–216, 1991.

671 Bronk Ramsey, C.: Bayesian analysis of Radiocarbon, *Radiocarbon*, 51(1), 337–360, 2009.  
672

673 Bronk Ramsey, C., & Lee S.: Recent and Planned Developments of the Program OxCal,  
674 *Radiocarbon*, 55(2-3), 720-730, 2013.

675 Coumbary, A. : Sur le tremblement de terre du 24 juin 1870, *Nouvelles Météorologiques*  
676 *Paris*, 3, 200-201, 1870.

677 Chagué-Goff, C., Schneider, J.-L., Goff, J.R., Dominey-Howes, D., Strotz, L.: Expanding the  
678 proxy toolkit to help identify past events — lessons from the 2004 Indian Ocean Tsunami  
679 and the 2009 South Pacific Tsunami, *Earth-Science Reviews*, 107, 107–122, 2011

680 Costa, P.J.M., Andrade, C. Freire, Freitas, M.C., Oliveira, M.A., Cascalho, J., Application of  
681 microtextural and heavy mineral analysis in the study of onshore tsunami deposits –  
682 examples from Portugal, Scotland and Indonesia, *Comunicações Geológicas*, III, 1439-  
683 1443, 2014.

684 CMT catalogue: Centroid Moment Tensor catalogue of Harvard,  
685 <http://www.seismology.harvard.edusearch.html>.

686 De Martini, P.M., Barbano, M.S., Pantosti, D., Smedile, A., Pirrotta, C., Del Carlo, P., and  
687 Pinzi, S.: Geological evidence for paleotsunamis along eastern Sicily (Italy): An  
688 overview: *Natural Hazards and Earth System Sciences*, 12 (8), 2569–2580, 2012.

689 Donato, S.V., E.G. Reinhardt, J.I.Boyce, R. Rothaus & T. Vosmer.: Identifying tsunami  
690 deposits using bivalve shell taphonomy, *Geology*, 36 (3), 199-202, 2008.

691 El-Sayed, A., Korrat, I., and Hussein, H. M.: Seismicity and seismic hazard in Alexandria  
692 (Egypt) and its surroundings, *Pure and Applied Geophysics*, 161, 1003–1019, 2004.

693 Folk RL, Ward WC. : Brazos River bar: a study in the significance of grain size parameters.  
694 *Journal of Sedimentary Petrology* 27: 3–26, 1957.

695 Font, E., C. Nascimento, Baptista M.A. & Silva P.F.: Identification of tsunami induced  
696 deposits using numerical modelling and rock magnetism techniques: A study case of the  
697 1755 Lisbon tsunami in Algarve, Portugal, *Physics of the Earth and Planets Interiors*,  
698 182, 187–198, 2010

699 Frihy , O.E., Deabes, E. a., and El Gindy, A. a.: Wave Climate and Nearshore Processes on  
700 the Mediterranean Coast of Egypt: *Journal of Coastal Research*, 261, 103–112 , 2010.

701 Fokaefs, A., and G. A. Papadopoulos.: Tsunami hazard in the Eastern Mediterranean: strong  
702 earthquakes and tsunamis in Cyprus and the Levantine Sea, *Natural Hazards*, 40 (3), 503–  
703 526, 2007.

704 Galanopoulos, A.G.: The seismic sea-wave of 9 Iouliou 1956, *Praktika Academy Athens*, 32,  
705 90–101, 1957.

706 Goff J, Dudley WC, de Maintenon MJ, Cain G, Coney JP.: The largest local tsunami in 20th  
707 century Hawaii, *Marine Geology* 226, 65–79, 2006

708 Goff, J.R., Lane, E., Arnold, J.: The tsunami geomorphology of coastal dunes, *Natural*  
709 *Hazards Earth System Sciences*, 9 (3), 847–854, 2009.

710 Guidoboni, E., Comastri, A. and Traina G.: Catalogue of Ancient Earthquakes in the  
711 Mediterranean area up to the 10th century, INGV-SGA, Bologna, 504 p., 1994.

712 Guidoboni, E., and A. Comastri : Catalogue of earthquakes and tsunamis in the Mediterranean  
713 area from the 11th to the 15th century, INGV-SGA, Bologna, 1037 p., 2005.

714 Hassouba, A.B.H.: Quaternary Sediments from the Coastal Plain of Northwestern Egypt  
715 (from Alexandria to Elomayid), *Carbonates and Evaporites*, 10 (1), 8–44, 1995.

716 Hall AM, Hansom JD, Williams DM, Jarvis J.: Distribution, geomorphology and lithofacies  
717 of cliff- top storm deposits: examples from the high-energy coasts of Scotland and  
718 Ireland. *Marine Geology*, 232, 131–155, 2006.

719 Hamouda, A.Z.: Numerical computations of 1303 tsunamigenic propagation towards  
720 Alexandria, Egyptian coast, *Journal African Earth Science*, 44, 37-44, 2006.

721 Hamouda, A.Z.: A reanalysis of the AD 365 tsunami impact along the Egyptian  
722 Mediterranean coast, *Acta Geophysica*, 58 (4), 687–704, 2009.

723 Jusseret, S. and Sintubin, M., Minoan Earthquakes: Breaking the Myth through  
724 Interdisciplinarity, Studies in Archaeological Sciences, Leuven University Press, 440 pp.,  
725 2017.

726 Lario, J., Zazo, C., Goy, J.L., Silva, P.G., Bardaji, T., Cabero, A., Dabrio, C.J., Holocene  
727 palaeotsunami catalogue of SW Iberia. Quaternary International 242, 196–200, 2011.

728 Lionello, P., J. Bhend, A. Buzzi, P.M. Della-Marta, S.O. Krichak, A. Jansã, P. Maheras, A.  
729 Sanna, I.F. Trigo, and R. Trigo, Chapter 6 in Cyclones in the Mediterranean region:  
730 Climatology and effects on the environment", Elsevier, 4, 325-372, 2006.

731 Maamoun, M., Megahed, A. and Allam, A.: Seismicity of Egypt, NRIAG Bulletin, IV (B),  
732 109–160, 1984.

733 Maramai, A., Brizuela, B., Graziani, L. : The Euro- Mediterranean tsunami catalogue. Annals  
734 of Geophysics, 57 (4), 1-26, 2014.

735 Marriner, N., Kaniewski, D., Morhange, C., Flaux, C., Giaime, M., Vacchi, M., and Goff, J.:  
736 Tsunamis in the geological record, making waves with a cautionary tale from the  
737 Mediterranean, Science Advances, 1-12, 2017.

738 Malik, J.N., Banerjee, C., Khan, A., Johnson, F.C., Shishikura, M., Satake, K., and Singhvi,  
739 A.K.: Stratigraphic evidence for earthquakes and tsunamis on the west coast of South  
740 Andaman Island, India during the past 1000years, Tectonophysics, 661, 49–65, 2015.

741 Matsumoto, D., H. Naruse, S. Fujino, A.Surphawajruksakul, T., Jarupongsakul, N., Sakakura  
742 & M. Murayama: Truncated flame structures within a deposit of the Indian Ocean  
743 Tsunami: evidence of syn-sedimentary deformation, Sedimentology, 55, .1559-1570,  
744 2008.

745 Matsumoto, D., Sawai, Y., Tanigawa, K., Fujiwara, O., Namegaya, Y., Shishikura, M.,  
746 Kagohara, K., Kimura, H., Tsunami deposit associated with the 2011 Tohoku-oki tsunami  
747 in the Hasunuma site of the Kujukuri coastal plain, Japan, Island Arc, 25, 269-385, 2016.

748 Maouche, S., Morhange, C. and Meghraoui, M.: Large boulder accumulation on the Algerian  
749 coast evidence tsunami events in the western Mediterranean, Marine Geology, 262 (1),  
750 96-104, 2009.

751 Meltzner, A.J., K. Sieh, H.-W. Chiang, C.-C. Shen, B.W. Suwargadi, D.H. Natawidjaja, B.E.  
752 Philibosian, R.W. Briggs, and J. Galetzka, Coral evidence for earthquake recurrence and  
753 an A.D. 1390-1455 cluster at the south end of the 2004 Aceh-Andaman rupture, J.  
754 Geophys. Res.115, B10402, doi:10.1029/2010JB007499, (2010).

755 Minoura, K., Imamura, F., Kuran, U., Nakamura, T., Papadopoulos, G. A., Takahashi, T.,  
756 Yalciner, A. C.: Discovery of Minoan tsunami deposits. Geology 28(1):59–62. 2000.

757 Morhange, C., Marriner, N., Pirazzoli, P.A.: Evidence of Late-Holocene tsunami events from  
758 Lebanon, *Z. Geomorphology*, 46, 81–95, 2006.

759 Morton, R. A., Gelfenbaum, G. and Jaffe, B. E., Physical criteria for distinguishing sandy  
760 tsunami and storm deposits using modern examples,  
761 *Sedimentary Geology*, 200, 3, 184-207, 2007.

762 Nanayama, F., Satake, K., Furukawa, R., Shimokawa, K., Atwater, B.F., Shigeno, K., and  
763 Yamaki, S.: Unusually large earthquakes inferred from tsunami deposits along the Kuril  
764 trench, *Nature*, 424 (6949), 660–663, 2003.

765 Paris, R., F., Lavigne, P., Wassmer, and J., Sartohadi : Coastal sedimentation associated with  
766 the December 26, 2004 tsunami in Lhok Nga, West Banda Aceh (Sumatra, Indonesia).  
767 *Marine Geology*, 238, 93–106, 2007.

768 Papadopoulos, G.A., E. Daskalaki, A. Fokaefs and N. Giraleas.: Tsunami hazard in the  
769 Eastern Mediterranean Sea: strong earthquakes and tsunamis in the West Hellenic Arc  
770 and Trench System, *Journal Earthquake and Tsunami*, 4 (3), 145-179, 2010.

771 Papadopoulos, G.A., Minoura, K., Imamura, F., Kuran, U., Yalçiner, A., Fokaefs, A.,  
772 Takahashi, T., Strong earthquakes and tsunamis in the East Hellenic arc. Research in  
773 *Geophysics* 2 (e12), 90–99. <http://dx.doi.org/10.4081/rg.2012.e12>. 2012.

774 Papadopoulos, G. A., Gràcia, E., Urgeles, R., Sallares, V., De Martini, P. M., Pantosti, D.,  
775 González, M., Yalçiner, A. C., Mascle, J., Sakellariou, D., et al.: Historical and pre-  
776 historical tsunamis in the Mediterranean and its connected seas: Geological signatures,  
777 generation mechanisms and coastal impacts, *Marine Geology*, 354, 81–109, 2014.

778 Polonia, A., Vaiani, S.C., de Lange, G.J.: Did the A.D. 365 Crete earthquake/tsunami trigger  
779 synchronous giant turbidity currents in the Mediterranean Sea?, *Geology*, 44, 191-194,  
780 2016.

781 Poirier, J. P. and Taher, M.A.: Historical Seismicity in the near and Middle East, North  
782 Africa, and Spain from Arabic Documents (VIIth- XVIIIth Century). *Bulletin Society*  
783 *Seismology American*, 70 (6), 2185–2201, 1980.

784 Reimer PJ, Bard E, Bayliss A, Beck JW, Blackwell PG, Bronk Ramsey C, Buck CE, Edwards  
785 RL, Friedrich M, Grootes PM, Guilderson TP, Haflidason H, Hajdas I, Hatté C, Heaton  
786 TJ, Hogg AG, Hughen KA, Kaiser KF, Kromer B, Manning SW, Reimer RW, Richards  
787 DA, Scott EM, Southon JR, Turney CSM, van der Plicht J.: Selection and treatment of  
788 data for radiocarbon calibration: an update to the International Calibration (IntCal)  
789 criteria, *Radiocarbon*, 55 (4), 1869-1887, 2013.

790 Salama, A.: Active tectonics and Paleo-tsunami records of the Northern Coast of Egypt, Ph.D  
791 thesis dissertation, University of Strasbourg, 429 pp., 2017.

792 Sayed, A.: Evaluation of the land resources for agriculture development. Case study : EL  
793 Hamman canal and its extension, NW coast of Egypt, Ph.D thesis dissertation, university  
794 of Hamburg, 241pp., 2013.

795 Salamon, A., Rockwell, T., Ward, S. N., Guidoboni, E. & Comastri, A.: Tsunami hazard  
796 evaluation of the Eastern Mediterranean: Historical analysis and selected  
797 modeling, Bulletin of the Seismological Society America, 97, 705–724, 2007.

798 Sawai, Y. Episodic emergence in the past 3000 years at the Akkeshi estuary, Hokkaido,  
799 northern Japan. *Quat. Res.* **56**, 231-241 (2001).

800 Schmidt, J.F.: Studien ueber Erdbeben. 1-136, 316-360, Leipzig, 1879.

801 Scheffers, A. & Kelletat, D. (2003): Sedimentologic and Geomorphologic Tsunami Imprints  
802 Worldwide – a Review. *Earth Science Reviews*, 63, 1-2, 83-92.

803 Shah-Hosseini, M., Saleem, A., Mahmoud, A. and Morhange, C.: Coastal boulder deposits  
804 attesting to large wave impacts on the Mediterranean coast of Egypt, Natural Hazards, 83  
805 (2), 849-865, 2016.

806 Shaw, B., Ambraseys, N. N., England, P.C., Floyd, M., Gorman, G.J., Higham, T.F.G.,  
807 Jackson, J., Nocquet, J-M., Pain, C. C., and Piggott, M. D.: Eastern Mediterranean  
808 tectonics and tsunami hazard inferred from the AD 365 earthquake, Nature Geoscience, 1  
809 (April), 268–276, 2008.

810 Soloviev, S.L., Solovieva, O.N., Go, C.N., Kim, K.S., and Shchetnikov, N.A.: Tsunamis in  
811 the Mediterranean Sea 2000 B.C.-2000 A.D., Advances in Natural and. Technological  
812 Hazards Research, Kluwer Academic Publishers, Dordrecht., Netherlands, 13, 237 p.,  
813 2000.

814 Stanley, J.D. – Bernasconi, M.P.: Holocene depositional patterns and evolution in  
815 Alexandria’s eastern harbor, Egypt, Journal of Coastal Research, 22 (2), 283-297, 2006.

816 Stiros, S. C.: The AD 365 Crete Earthquake and Possible Seismic Clustering During the  
817 Fourth to Sixth Centuries AD in the Eastern Mediterranean: A Review of Historical and  
818 Archaeological Data, Journal of Structural Geology, 23, 545–562, 2001.

819 Stiros, S., and Drakos, A.: A fault model for the tsunami-associated magnitude >8.5 Eastern  
820 Mediterranean, AD 365 earthquake, Zeitschrift für Geomorphologie, 146, 125–137,  
821 2006.

822 Spiske M, Bończ Z, Bahlburg H.: The role of porosity in discriminating between tsunami and  
823 hurricane emplacement of boulders—a case study from the Lesser Antilles, southern  
824 Caribbean, *Earth Planet Science Letters*, 268, 384–396, 2008.

825 Switzer, A. D. and Jones, B.G.: Large scale washover sedimentation in a freshwater lagoon  
826 from the southeast Australian coast: sea level change, tsunami or exceptionally large  
827 storm?, *The Holocene*, 18 (5), 787-803, 2008.

828 Szczucinski, W., N. Chaimanee, P. Niedzielski, G. Rachlewicz, D. Saisuttichai, T. Tepsuwan,  
829 S.Lorene& J. Siepak : Environmental and geological impacts of the 26 December 2004  
830 Tsunami in coastal zone of Thailand- Overveiw of short and long term effects. In:  
831 *Polish Journal of Environmental studies*, 15 (5), 793-810, 2006.

832 Taymaz, T., Westaway, R., and Reilinger, R.: Active faulting and crustal deformation in the  
833 Eastern Mediterranean region, *Tectonophysics*, 391, 1–9, 2004.

834 Tinti, S., Maramai, A. and Graziani, L. (2001a). “A New Version of the European Tsunami Catalogue:  
835 Updating and Revision”, *Natural Hazards and Earth System Sciences*, 1, 255-262, 2001.

836 Tinti, S., Manucci, A., Pagnoni, G., Armigliato, A., and Zaniboni, F.: The 30 December 2002  
837 landslide-induced tsunamis in Stromboli: sequence of the events reconstructed from the  
838 eyewitness accounts, *Natural Hazards and Earth System Science*, 5 (6), 763–775, 2005.

839 Tyuleneva, N., Braun, Y., Katz, T., Suchkov, I., Tchernov, B.N.G.: A new chalcolithic-era  
840 tsunami event identified in the offshore sedimentary record of Jisr al-Zarka (Israel) ,  
841 Marine Geology (article in press), 1-12, 2017.

842 Tuttle, M.P., Ruffman, A., Anderson, T., and Jeter, H.: Distinguishing tsunami from storm  
843 deposits in eastern North America: the 1929 Grand Banks tsunami versus the 1991  
844 Halloween storm, *Seismological Research letters*, 75, 117-31, 2004.

845 Yalciner, A., Zaytsev, A., Aytore, B., Insel, I., Heidarzadeh, M., Kian, R., and Imamura, F.: A  
846 Possible Submarine Landslide and Associated Tsunami at the Northwest Nile Delta,  
847 *Mediterranean Sea: Oceanography*, 27, (2), 68–75, 2014.

848



849 **Table captions**

850 Table 1: Major earthquakes of the eastern Mediterranean with tsunami wave records in  
851 northern Egypt. Estimated magnitudes are given in  $M_w$  when calculated and in  $M$  when  
852 estimated.

853

854 Table 2 a: Radiocarbon dating samples and calibrated ages at Kefr Saber site using OxCal  
855 v4.2.4 (Bronk-Ramsey, 2013).

856

857 Table 2 b: Radiocarbon dating samples and calibrated ages in El Alamein site using OxCal  
858 v4.2.4 (Bronk-Ramsey, 2013)

859

860

861

862 **Figure captions**

863 Figure1: Seismicity (instrumental with  $M > 5.5$ ) and main tectonic framework of the east  
864 Mediterranean regions. Black boxes indicate the paleoseismic sites of Kefr Saber and El  
865 Alamein east of the Nile delta. The major historical earthquakes (blue box) of AD 365 ( $M_w$  8  
866 – 8.5), AD 1303 ( $M_w$  ~8) and AD 1870 ( $M_w > 7 - 7.5$ ) are located along the Hellenic  
867 subduction zone according to Guidoboni et al. (1994), Stiros (2001); Ambraseys (2009);  
868 Papadopoulos et al. (2014) and Jusseret and Sintubin (2017). Focal mechanisms are CMT-  
869 Harvard.

870

871 Figure 2: Location of trenches and core sites at (a) Kafr Saber, (b) El Alamein (see also  
872 Figure 1), and (c) Dune ridge and a lagoon south of the Mediterranean Sea as a selected site  
873 for coring and trenching at EL Alamein site.

874

875 Figure 3: a) Trench ponorama at Kefr Saber, and (b) description of sedimentary layers of  
876 trench P 4 with carbon dating sampling (yellow flags); the horizontal ruler indicates 20 cm  
877 scale.

878

879 Figure 4: Radiocarbon dating calibrated with probability density function (pdf) using Oxcal  
880 version 4.2 (Bronk-Ramsey, 2009) and chronology of sedimentary layers and tsunami record  
881 of trenches at Kefr Saber. The dating characteristics are in Table 2 a. The Bayesian dating  
882 simulation of the white sandy unit in Fig. 3 b can be correlated with the 365 AD tsunami  
883 event.

884

885 Figure 5: a) Core 1 log description with X-ray scanning, lithology log, magnetic  
886 susceptibility, mean grain size, sediment sorting, total organic and inorganic matter and bulk  
887 mineralogy. The arrows show the high values of each measurement that may correlate with  
888 tsunami deposits.

889 b) Core 9 log description with X-ray scanning, lithology log, magnetic susceptibility, mean  
890 grain size, sediment sorting, total organic and inorganic matter and bulk mineralogy. The  
891 arrows show the high values of each measurement that may correlate with tsunami deposits.

892 (Similar illustrations of cores 2 to 12 are in supplemental materials).

893

894 Figure 6: Radiocarbon dating calibrated with probability density function (pdf) using Oxcal  
895 version 4.2 (Bronk-Ramsey, 2009) and chronology of sedimentary layers with dated tsunami  
896 records at El Alamein. The dating characteristics are in Table 2 b. Black pdfs refer to the  
897 dated samples and red pdfs are simulated dating of the four tsunami records. Three

898 sedimentary records are correlated with the historical earthquake and tsunami catalogue of the  
899 eastern Mediterranean (See also Table 1).

900

901 Figure 7: Depth distribution of tsunami layers in cores at the El Alamein site (see also core  
902 locations in Fig. 2 b). The depth correlation of paleotsunami layers indicates the consistent  
903 succession of deposits in the lagoon. Deposits of layers 1, 2 and 3 are related with tsunami  
904 events 1870 AD, 1303 AD and 365 AD of the East Mediterranean Sea (see also Fig. 6 and  
905 Table 1). Layer 4 corresponds to tsunami event 1491 – 1951 BC and is not reported in  
906 tsunami catalogues.

907

908

909

910

911

912  
913 TABLES

914  
915

916 Table 1: Major earthquakes of the eastern Mediterranean with tsunami wave records in  
917 northern Egypt. Estimated magnitudes are given in  $M_w$  when calculated and in  $M$  when  
918 estimated.

919  
920

| Date         | Epicentre                  | Estimated Magnitude | Comment                               | Reference                                                |
|--------------|----------------------------|---------------------|---------------------------------------|----------------------------------------------------------|
| 21 July 365  | Western Crete              | 8.3 – 8.5 ( $M_w$ ) | Tsunami northern Egypt                | Stiros and Drakos, 2006; Shaw et al., 2008, Hamouda 2009 |
| 18 Jan. 746  | Dead Sea Fault             | 7.5 (M)             | Tsunami eastern Medit.                | Ambraseys, 1962                                          |
| 881 - 882    | Palestine                  | ?                   | Tsunami in Alexandria & Palestine     | Galanopoulos A., 1957                                    |
| 4 Jan. 1033  | Jordan Valley Fault        | 7.4 (M)             | Tsunami northern Egypt                | Ambraseys, 1962                                          |
| 18 Jan. 1068 | Northern Lebanon           | 6.9 (M)             | Waves in Lebanon Until northern Egypt | Ambraseys, 1962, Soloviev et al., 2000                   |
| 8 Aug. 1303  | Karpathos & Rhodos islands | 8 (M)               | >8-m-high wave in Alexandria          | Abu al-Fida 1329, Ambraseys 2009, Hamouda 2006           |
| 24 June 1870 | Hellenic Arc               | $M_L$ 7.2           | Inundation in Alexandria harbour      | Ben-Menahem, 1979, Soloviev et al., 2000                 |

921  
922  
923  
924  
925  
926

927 Table 2 a: Radiocarbon dating samples and calibrated age at KefrSaber site using OxCal  
 928 v4.2.4 (Bronk-Ramsey, 2013). White background color is for charcoal and grey for shell ages  
 929

| No. | Sample name | Laboratory Name | Type of samples | Depth (m) | Date BP       | Calibrated. date |
|-----|-------------|-----------------|-----------------|-----------|---------------|------------------|
| 1   | TSU P4 S2   | CIRAM           | Charcoal        | 61        | Modern        | -                |
| 2   | TSU P4 S3   | CIRAM           | Charcoal        | 40        | Modern        | -                |
| 3   | TSU P4 S4   | CIRAM           | Charcoal        | 15        | Modern        | -                |
| 4   | TSU P1 S07B | Poznan          | Charcoal        | 35        | 110.14±0.3    | Modern           |
| 5   | TSU P4 S6   | Poznan          | Charcoal        | 25        | 101.42 ± 0.68 | 1700 – 1920 AD   |
| 6   | TSU P3 S2   | Poznan          | Charcoal        | 72        | 1075 ± 30 BP  | 890 – 1020 AD    |
| 7   | KSB2S2      | Poznan          | Dendropoma      | Boulder   | 890 ± 30 BP   | 940 - 1446 AD    |
| 8   | TSU P5S3    | Poznan          | Charcoal        | 17        | 2060 ± 35 BP  | 180 – 30 AD      |
| 9   | TSU P3S2    | CIRAM           | Charcoal        | 73        | 2000 BP       | 50-70 AD         |
| 10  | TSU P5S1    | Poznan          | Charcoal        | 12        | 2145 ± 30 BP  | 360 – 50BC       |
| 11  | TSU P5S4    | Poznan          | Charcoal        | 33        | 2590 ± 140 BP | 1050 – 350 BC    |
| 12  | TSU P5S2    | Poznan          | Charcoal        | 37        | 4560 ± 300 BP | 4000 – 2400 BC   |
| 13  | TSU P3S3    | CIRAM           | Charcoal        | 100       | 6240 BP       | 5300 – 5070 BC   |
| 14  | TSU P4 S5   | Poznan          | Charcoal        | 60        | 15490 ± 70 BP | 17200 – 15900 BC |
| 15  | TSU P1 S09B | CIRAM           | Charcoal        | 53        | 40560 BP      | 39000-38250 BC   |

- 930
- 931 ▪ CIRAM Lab. science for art cultural heritage ,archeology department <http://www.ciram-art.com/en/archaeology.html>
- 932
- 933 ▪ Poznan Lab. Poznan Radiocarbon Laboratory, Poland, email: c.fourteen@radiocarbon.pl
- 934 <http://radiocarbon.pl/index.php?lang=en>.
- 935 ▪ Beta Analytic radiocarbon dating, Miami, Florida, USA <http://www.radiocarbon.com/>, e-mail:
- 936 [lab@radiocarbon.com](mailto:lab@radiocarbon.com)
- 937
- 938

939 Table 2 b: Radiocarbon dating samples and calibrated date in El Alamein site using OxCal  
 940 v4.2.4 (Bronk-Ramsey, 2013). Underlined dark grey color is for bone, grey for shell, light  
 941 grey for root and white for charcoal samples.  
 942

| No. | Sample name       | Laboratory Name | Type of samples | Depth (m) | Date BP  | Calibrated date (2σ) |
|-----|-------------------|-----------------|-----------------|-----------|----------|----------------------|
| a   | AL1 S1 (test pit) | CIRAM           | charcoal        | 25        | 130±20   | 1680-1908 AD         |
| b   | AL1 S2 (test pit) | CIRAM           | charcoal        | 56        | 190±20   | 1661-1931 AD         |
| 1   | core 6/2 sa1      | Poznan          | charcoal        | 80        | 125±30   | <1620 AD             |
| 2   | core 1/1sa2       | Poznan          | Bone            | 50        | 1540±60  | 403-634 AD           |
| 3   | core 7/1sa1       | Poznan          | shell           | 17        | 3000±30  | 293-1113 BC          |
| 4   | core 9/1sa1       | Poznan          | gastropod       | 24        | 3320±30  | 1052-1888 BC         |
| 5   | core10/1sa3       | Poznan          | shells          | 20        | 4515 ±30 | 2623-3521 BC         |

|    |               |               |                  |     |            |                 |
|----|---------------|---------------|------------------|-----|------------|-----------------|
| 6  | core11/2sa1   | Beta analytic | roots            | 139 | 4810±30    | 2666 - 2817 BC  |
| 7  | core11/2Sa4   | Poznan        | gastropod +shell | 116 | 4500±35    | 2619-3386 BC    |
| 9  | core11/2sa6   | Poznan        | gastropod        | 126 | 4405±35    | 2477-3368 BC    |
| 10 | core 11 2_5   | Poznan        | gastropod        | 121 | 4360±40    | 2457-3366 BC    |
| 11 | core 12/2sa1  | Beta analytic | gastropod        | 108 | 4885±35    | 3097-3950 BC    |
| 12 | core 12/2sa2  | Poznan        | gastropod        | 114 | 5000±35    | 3331-4050 BC    |
| 12 | core 12/1 sa1 | Poznan        | gastropod        | 44  | 5065±30    | 3367-4072 BC    |
| 13 | core 12/2sa4  | Beta analytic | roots            | 135 | 5060±30    | 3365-4071 BC    |
| 14 | core 11/1sa1  | Beta analytic | gastropod        | 20  | 5230±30    | 3638-4328 BC    |
| 15 | core 11-2     | Beta analytic | charcoal         | 180 | 5020±30    | 3710-3943 BC    |
| 16 | core 1/1sa1   | Poznan        | charcoal         | 40  | 13430±60   | 13985-14415 BC  |
| 17 | core 11/2sa2  | Beta analytic | shell            | 62  | 16900±60   | 17869-18741 BC  |
| 18 | core2/1sa6    | Poznan        | gastropods       | 75  | 32000±360  | 32971-34681 BC  |
| 19 | core 4/1sa1   | Poznan        | shell            | 28  | 31840±350  | 32887-34447BC   |
| 20 | core11/2 sa11 | Beta analytic | shells           | 152 | 32500±500  | 33294-36120 BC  |
| 21 | core2/1sa4    | Poznan        | gastropods       | 77  | 35500±500  | 34362-36931 BC  |
| 22 | core 3/1sa1   | Poznan        | shell            | 45  | 33500±600  | 34218- 37224 BC |
| 23 | core 6/1 sa6  | Poznan        | gastropod        | 45  | 34000±400  | 35002-37441 BC  |
| 24 | core 12/2 sa3 | Beta analytic | broken shell     | 117 | 37940±420  | 39560 -40811 BC |
| 25 | core 9/1sa5   | Poznan        | bivalve          | 55  | 40000±800  | 40521-43169 BC  |
| 26 | core 10/1sa2  | Poznan        | bone             | 70  | 42000±1300 | 41256-46581 BC  |
| 27 | core 3/1sa2   | Poznan        | bivalve          | 37  | 45000±2000 | 43618 BC        |
| 28 | core 6/1sa9   | Poznan        | coral            | 60  | 50000±4000 | 42776-69225 BC  |

943  
944  
945  
946  
947  
948  
949  
950

- CIRAM Lab. science for art cultural heritage ,archeology department <http://www.ciram-art.com/en/archaeology.html>
- Poznan Lab. Poznan Radiocarbon Laboratory, Poland, email: [c.fourteen@radiocarbon.pl](mailto:c.fourteen@radiocarbon.pl) <http://radiocarbon.pl/index.php?lang=en>.
- Beta Analytic radiocarbon dating, Miami, Florida, USA <http://www.radiocarbon.com/>, e-mail: [lab@radiocarbon.com](mailto:lab@radiocarbon.com)

951  
952  
953  
954  
955

956

957 Figure 1

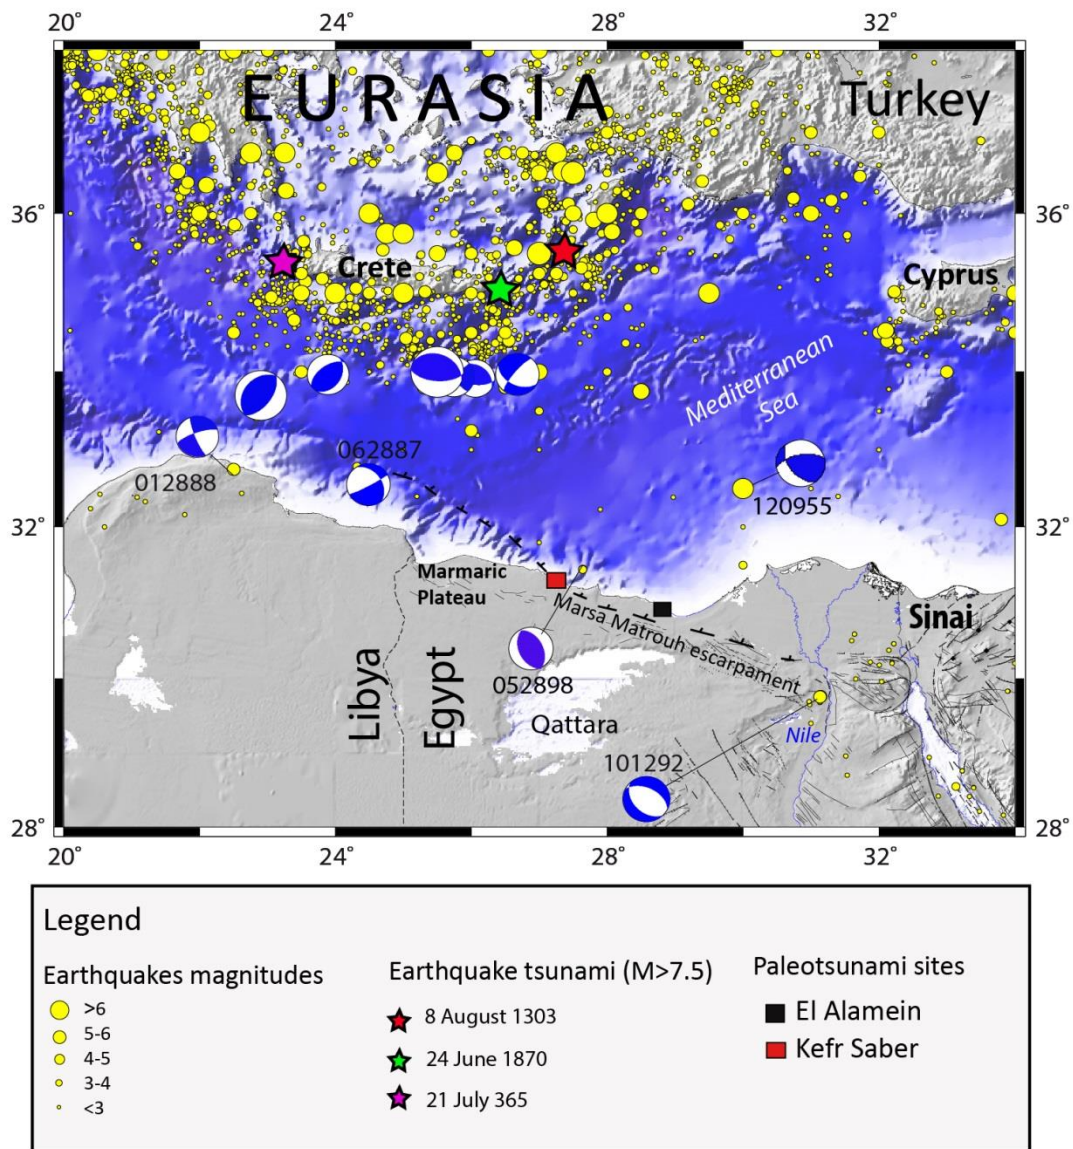

958

959

960

961

962

963

964

965

966



### Kefr Saber

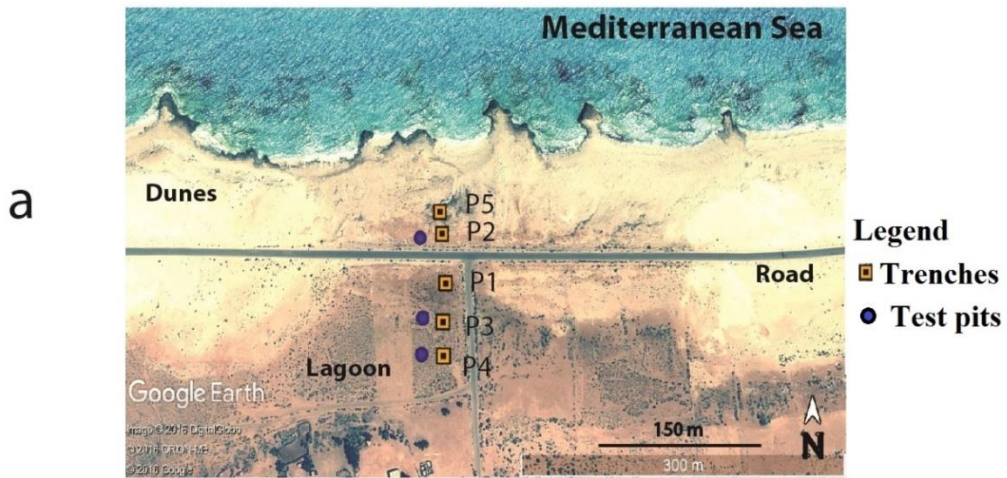

### EL Alamein

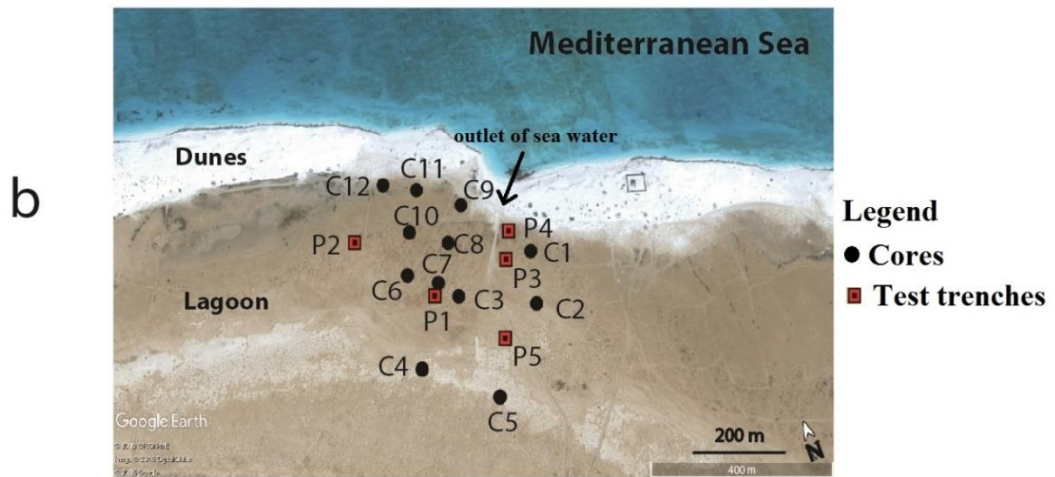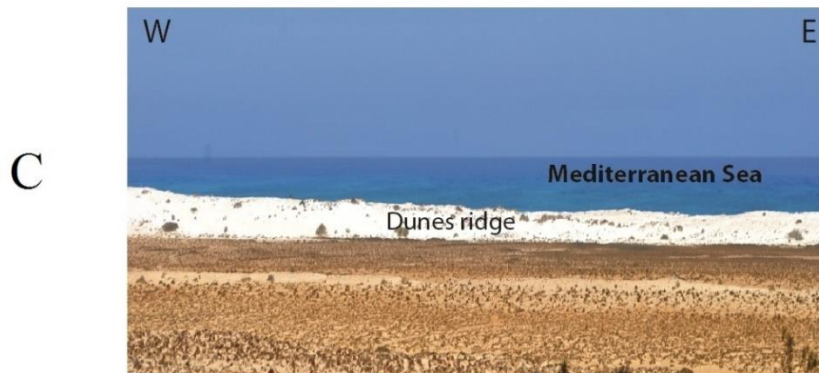

968

969

970

971



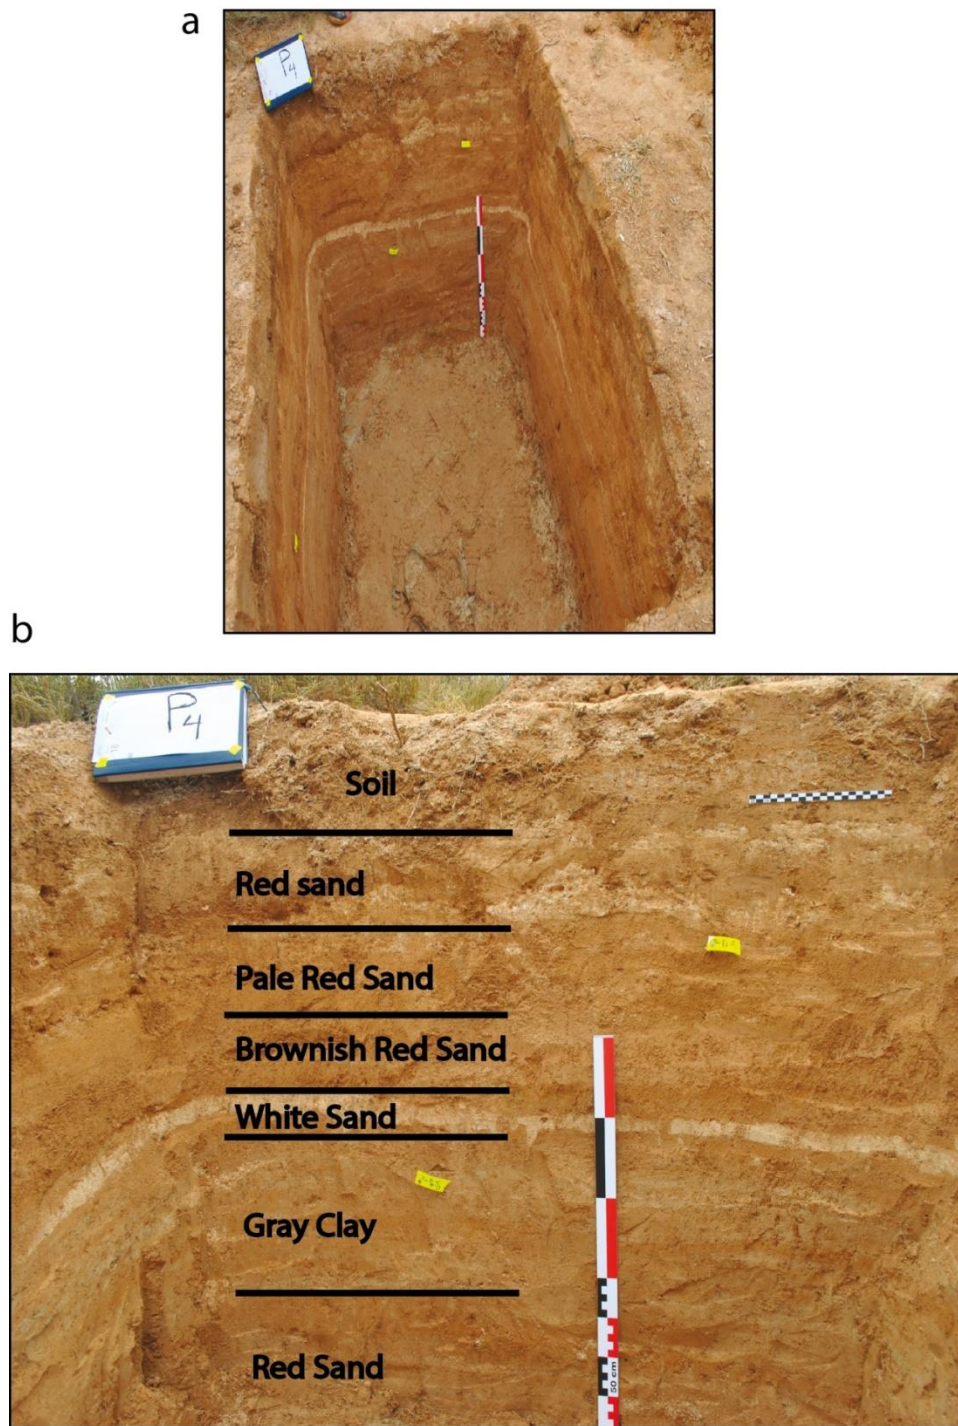

973

974

975

976

977

978

979

980 Figure 4

# Kefr Saber

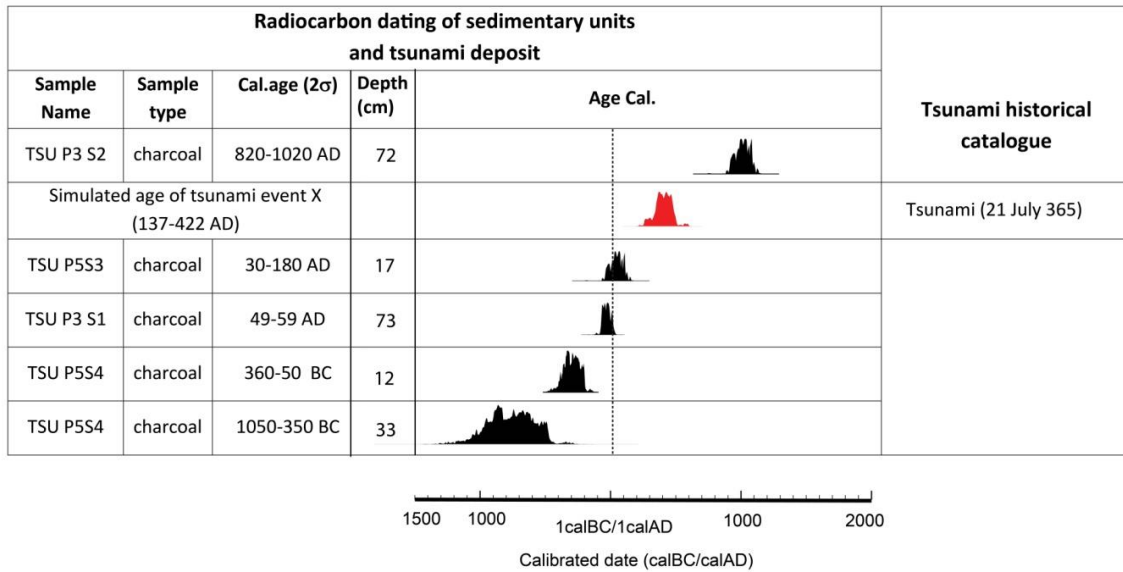

981

982 See main comment #29 from C. J. Dabrio Gonzalez and author edit in this figure

983 See main comment #7 b- from R. Paris and author edit in this figure

984 Figure 5 a

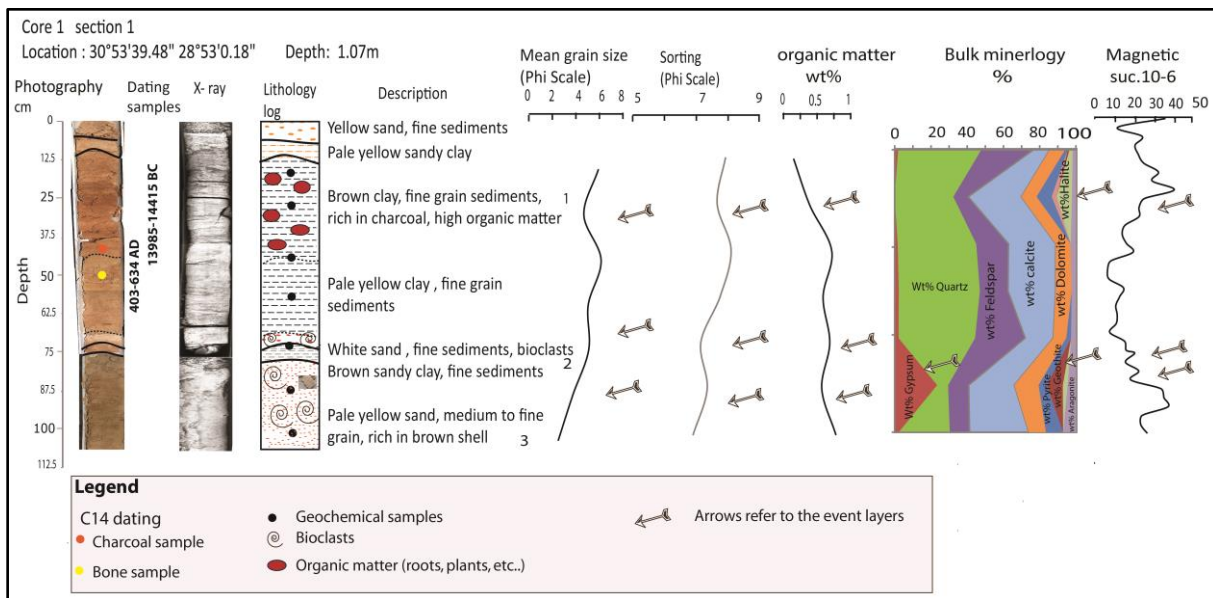

985

986

987

988

989 Figure 5 b

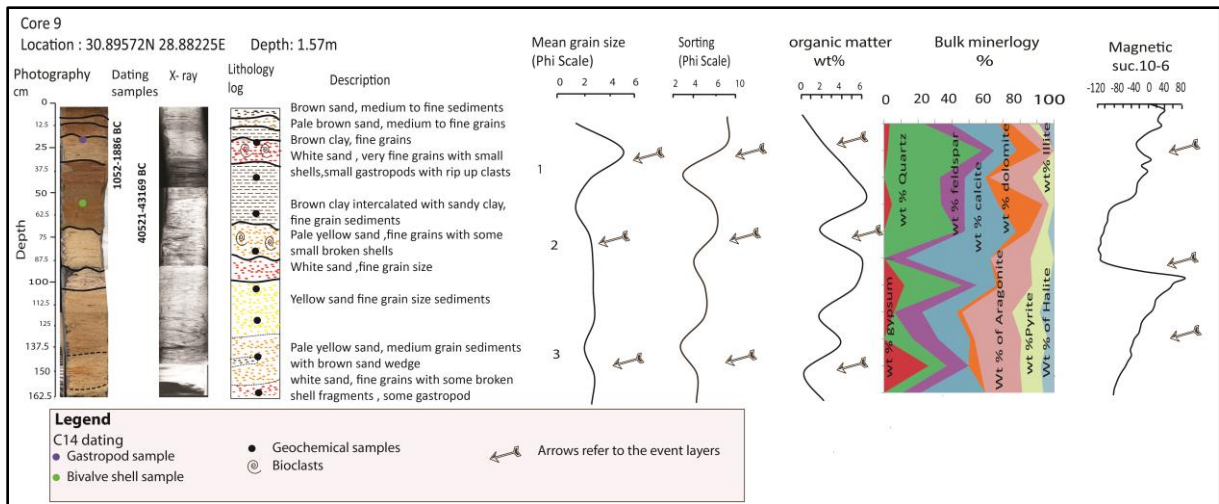

990

991

992 Figure 6

| Sample name                                     | Sample type | Location-cal. age (2σ) | Age Cal.                 |
|-------------------------------------------------|-------------|------------------------|--------------------------|
| AL1S1                                           | charcoal    | AL: 1670-1890          |                          |
| Simulated age of tsunami event Z (1805-1935 AD) |             |                        | Tsunami (24 June 1870)   |
| AL1S2                                           | charcoal    | AL: 1660-1810          |                          |
| Simulated age of tsunami event Y (1168-1689 AD) |             |                        | Tsunami (21 August 1303) |
| Core1/1sa2                                      | bone        | AL: 403-634            |                          |
| Simulated age of tsunami event X (48-715 AD)    |             |                        | Tsunami (21 July 365)    |
| BC/AD                                           |             |                        |                          |
| Core7/1sa1                                      | shells      | AL: 1113-293           |                          |
| Core9/1sa1                                      | gastropod   | AL: 1490-737           |                          |
| Simulated age of tsunami event W (1491-1951BC)  |             |                        | ??                       |
| Core 11/2sa5                                    | gastropod   | AL: 2856-1970          |                          |
| Core 11/2sa4                                    | gastropod   | AL: 3014-2131          |                          |
| Core 11/2sa1                                    | roots       | AL: 3954-3789          |                          |

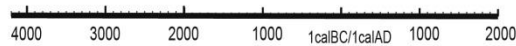

Calibrated date (calBC/calAD)

993

994

995

996 Figure 7  
997

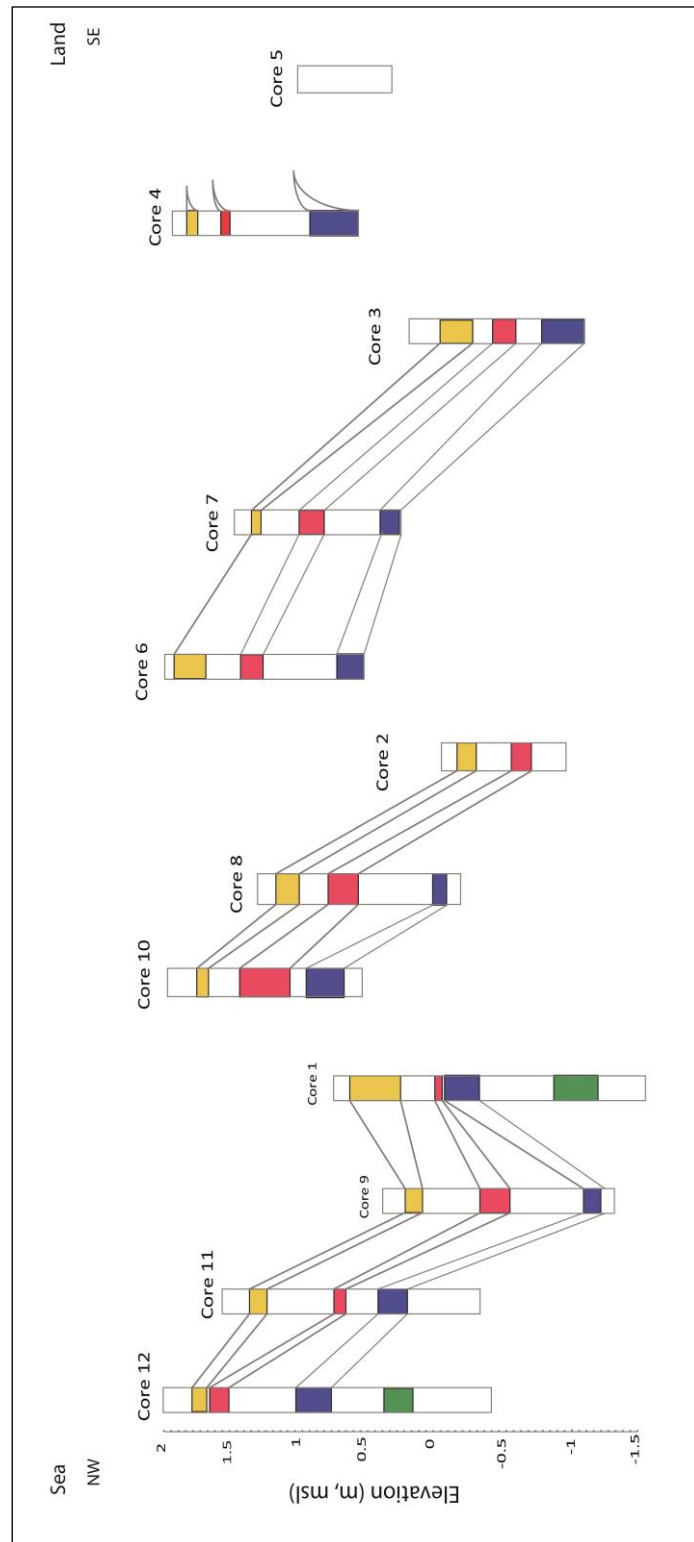

998  
999

1000

1001

## Supplementary Material

to the submitted manuscript Nat. Hazards Earth Syst. Sci. Discuss.,  
<https://doi.org/10.5194/nhess-2018-62>

### **Methodology**

#### **1. Grain size**

Grain-size statistical parameters and graphic representations are given in  $\phi$  units. Converting from microns to mm (as 1 micron =  $10^{-3}$  mm) to Phi units using the following equation: -

$$\phi = -\log_2(d) \quad \text{where } d \text{ is grain diameter in millimetres}$$

The calculated grain size analyses distribution parameters have been calculated following Folk and Ward (1957) to determine the mean grain size, sorting. The most useful parameters of grain-size analysis for this study are the mean grain size and sorting. The following equations calculate mean size, sorting according to Folk (1968).

1. "Mean" - is the average grain-size. Several formulas are used in calculating the mean. The most inclusive graphically derived value is that given by Folk (1968),

According to equations:

$$M_z = \frac{\phi_{16} + \phi_{50} + \phi_{84}}{3}$$

Where 16, 50, and 84 represent the size at 16, 50, and 84 percent of the sample by weight.

2. Sorting is a method of measuring the grain-size variation of a sample by encompassing the largest parts of the size distribution as measured from a cumulative curve.

Folk (1968) introduced the "inclusive graphic standard deviation", that is calculated as follows: =

$$\sigma = \frac{\varphi_{84} - \varphi_{16}}{4} + \frac{\varphi_{95} - \varphi_5}{6.6}$$

where 84, 16, 95, and 5 represent the phi values at 84, 16, 95, and 5 percentiles.

The classification scale for sorting:

<0.350: very well sorted;

0.35-0.500: well sorted;

0.5-0.710: moderately well sorted;

0.71-1.00: moderately sorted;

1.00-2.00: poorly sorted;

2.00-4.00: very poorly sorted;

> 4.00: extremely poorly sorted.

## **2. Bulk mineralogy and x-ray diffraction**

According to (Pecharsky et al., 2009), X-ray diffraction (XRD analysis) is a very useful tool for the identification of bulk mineral phases in powder specimens in the form of powder thin-film samples. The key for identifying materials by this method is their unique crystalline structure. The XRD instrument was called an X-ray diffractometer.

In cooperation with the Central Metallurgical Research Center Laboratory, Cairo, the collected samples were mounted in X-ray specimen holder on glass slides. The powder specimens were stuck on a glass slide using double-sided tape or Vaseline. The machine is equipped with a Philips PW 1730 X-ray diffractometer to measure the samples in the studied area under target Fe, filter Mn, KV 30, Ma 20, with speed 1 degree.

The data were analyzed in a semi-quantitative way following Cook et al. (1975). The intensity of the most intense diffraction peak of each mineral was measured and the identification of crystalline substance and crystalline phases in a specimen is achieved by comparing the specimen diffraction spectrum with spectra of known crystalline substances (Table 1). X-ray diffraction data from a known substance (called fingerprint) are recorded as a powder diffraction file (PDF).

Most PDFs were obtained with  $\text{CuK}\alpha$  radiation Standard diffraction published by the International Centre for Diffraction Data (ICDD) and summarized in Table 1, and they are updated and expanded from time to time.

**Table 1: Diffraction standard main peak identify minerals according to (ICDD)**

| Minerals                                             | Principal diffraction peak (Å) |
|------------------------------------------------------|--------------------------------|
| Gypsum ( $\text{CaSo}_4 \cdot 2\text{H}_2\text{O}$ ) | 7.56                           |
| Quartz                                               | 3.34                           |
| Calcite                                              | 2.92                           |
| Dolomite ( $\text{CaMg}(\text{Co}_3)_2$ )            | 2.89                           |
| Feldspar (Albite)                                    | 3.1875                         |
| Feldspar (Orthoclase )                               | 3.3193                         |
| Aragonite                                            | 3.3985                         |
| Halite                                               | 2.81                           |
| Goethite                                             | 4.19                           |
| Pyrite ( $\text{FeS}$ )                              | 2.7090                         |
| Illite                                               | 10                             |
| Montmorillonite                                      | 15                             |

### 3. Regional wave regime during storms

In the Mediterranean, the tropical to subtropical cyclones storms are frequent seasonal events, with ~100 recorded tropical like storms between 1947 and 2011. From tide stations recorded in front of Alexandria, the maximum wave height surge is 43 cm between 1971-2004 (Hamed et al., 1988), the maximum wave height surge is 76.9 cm between 1996-2000 (Hussein et al., 2010).



## References

- Cook, H. E., Johnson, P. D., Matti, J. C. & Zemmels, I., Methods of sample preparation and x-ray diffraction data analysis, x-ray mineralogy laboratory. In: Kaneps, A. G. (Ed.), Initial reports of the DSDP 28, Washington DC, p.997-1007, 1975
- Folk, R.L.: Petrology of sedimentary rocks, 170 pp, Hemphill's Book Store, in Austin, Texas), 1968
- Folk RL, Ward WC. : Brazos River bar: a study in the significance of grain size parameters. *Journal of Sedimentary Petrology* 27: 3–26, 1957.
- Hamed, A.A. and El Gindy, A.A., Storm surge generation by winter cyclones at Alexandria, Egypt, *International Hydrographic Review*, Monaco, LXV(1), January 1988.
- Hussein, M.M.A., Moursy, Z.A., and Tayel, M.F., General Pattern of Alexandria Western Harbor Sea Level Changes, *JKAU: Mar. Sci.*, Vol. 21, No. 2, pp: 47-61, 2010. DOI : 10.4197/Mar. 21-2.4
- Pecharsky, V.K. and P.Y. Zavalij.:*Fundamentals of Powder Diffraction and Structural Characterization of Materials*. 2009: Springer US., pp.713, 2009



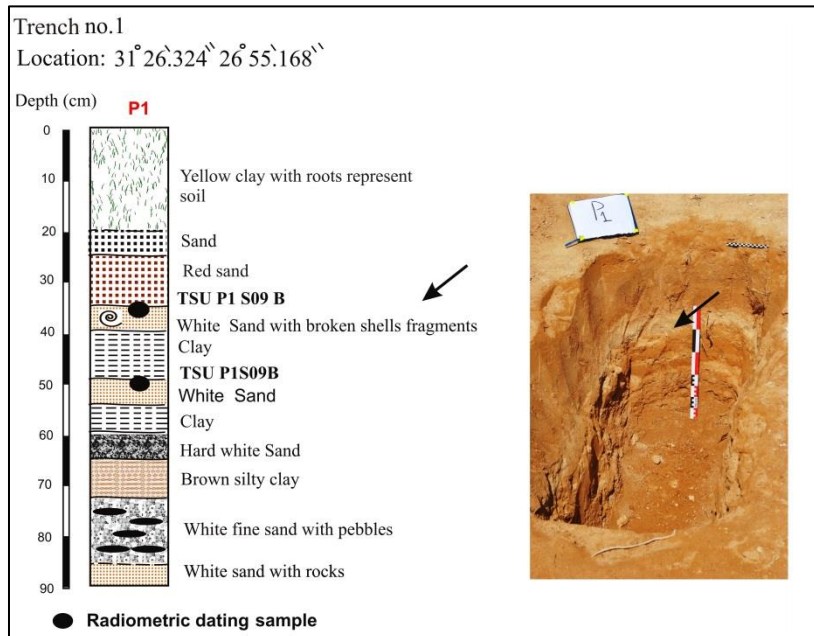

Figure S1 a: Description of Trench no.1 with black arrow refers to white coarse sand high energy sedimentary layer rich in reworked fossils

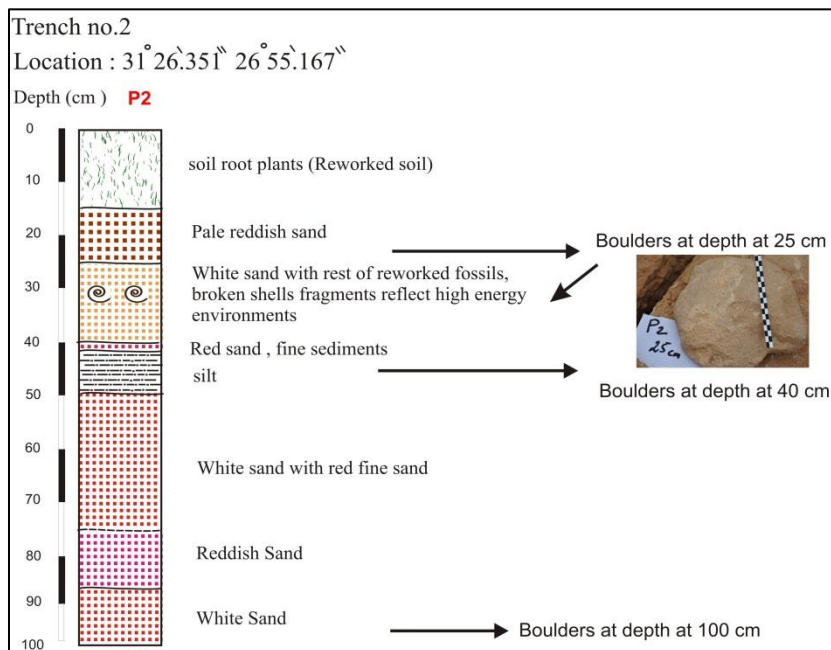

Figure S1 b: Description of Trench no.2 with black arrow refers to white coarse sand high energy sedimentary layer rich in reworked fossils

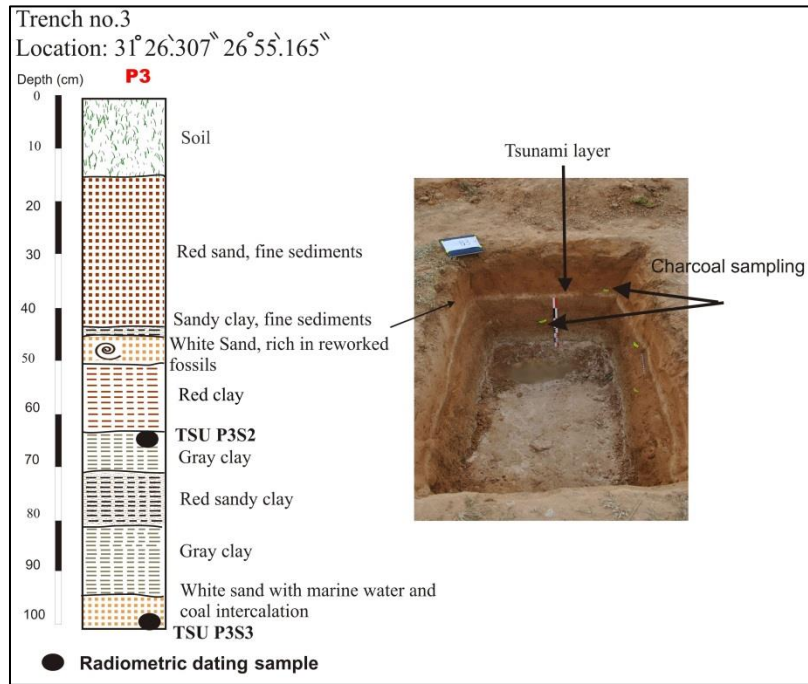

Figure S1 c: Description of Trench no.3 with black arrow refers to white coarse sand high energy sedimentary layer rich in reworked fossils.

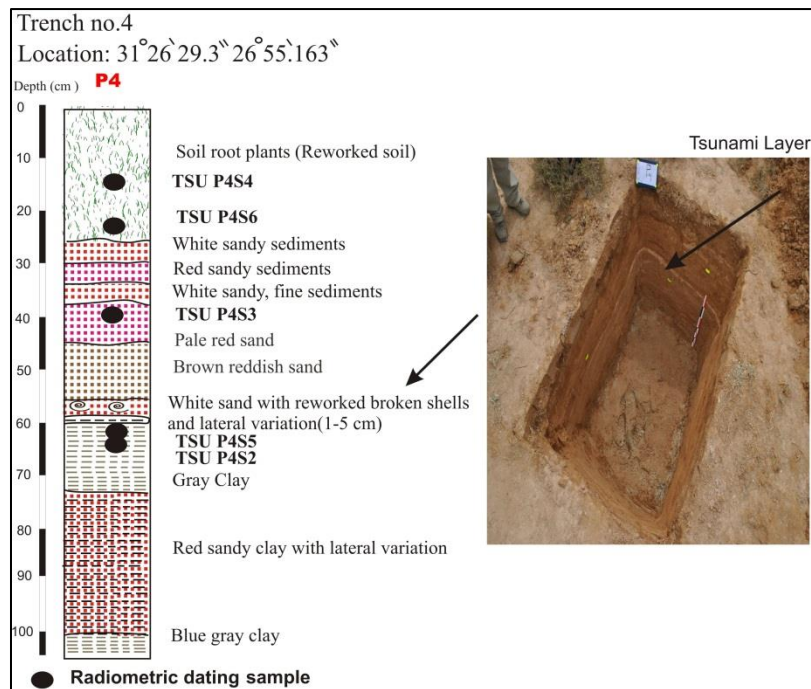

Figure S1 d: Description of Trench no.4 with black arrow refers to white coarse sand high energy sedimentary layer rich in reworked fossils.

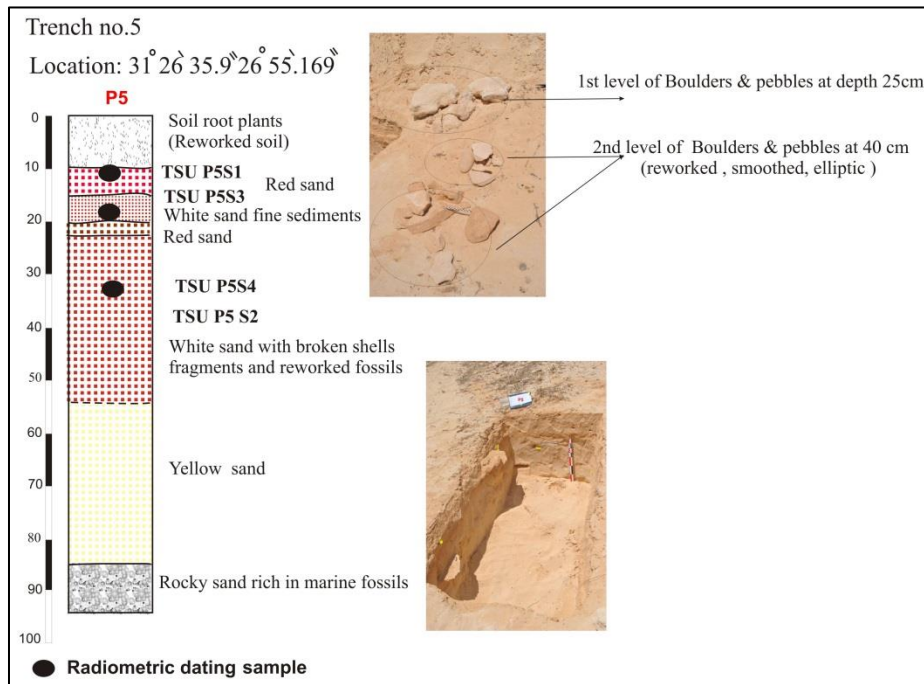

Figure S1 e : Description of Trench no.5

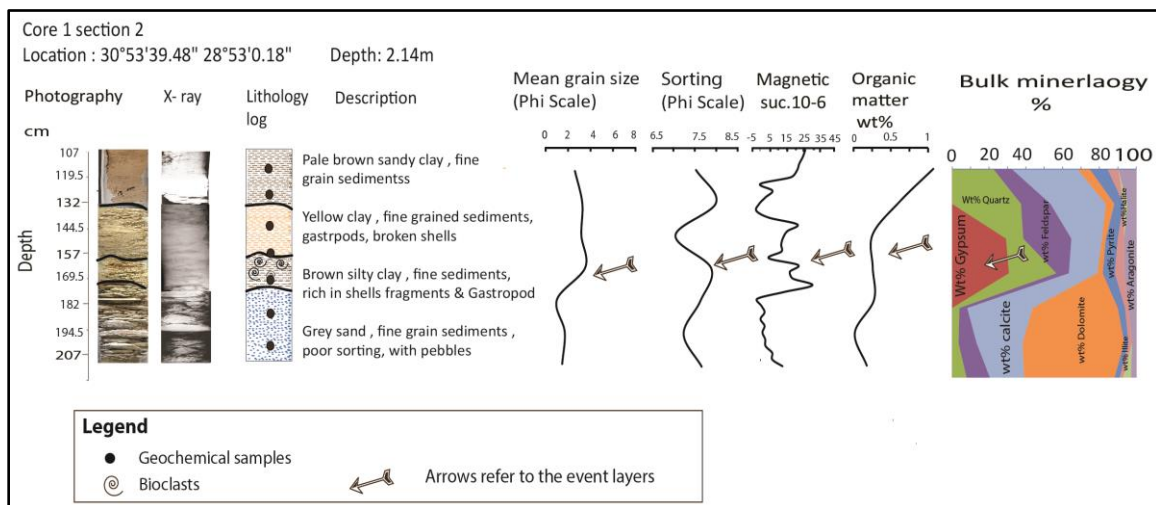

Figure S2 – 1: Description of core no.1 section 2 with photography, x-ray scanning, detail description of lithology, mean grain size, sorting, total organic and inorganic matter and bulk mineralogy. The fourth layer (see pointed arrows) of high energy deposits with coarse sand and mixed clay and organic matter. This layer characterized by low value at top to high value at bottom of magnetic susceptibility in the bottom due to presence of pyrite and also, high organic matter content are interpreted as deposits of high energy sedimentary origin.

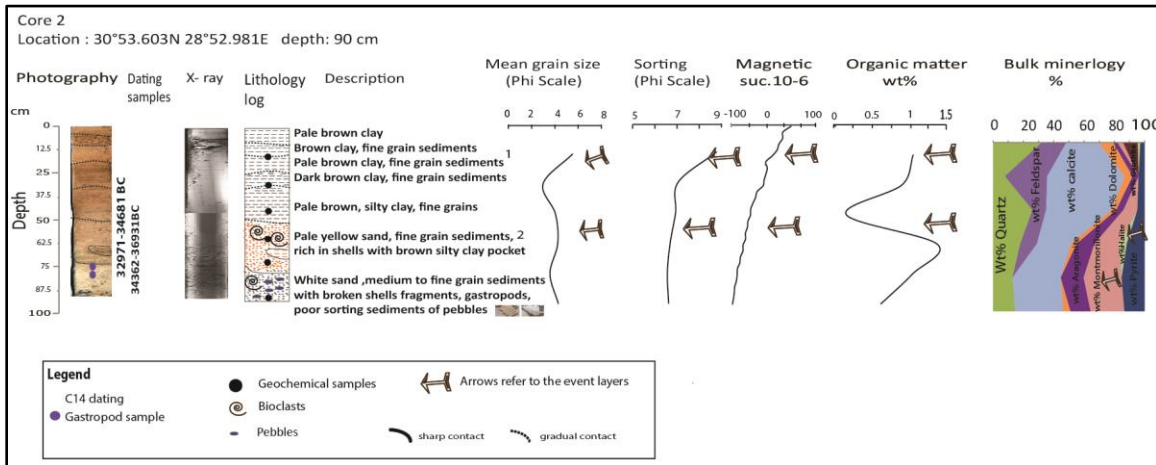

Figure S2 -2 : Description of core no.2 with photography, x-ray scanning, detail description of lithology, mean grain size, sorting, total organic and inorganic matter and bulk mineralogy. The core is at s ~90 cm deep located south of core 1 at ~264 m from the shoreline. It reveals 2 main layers (see numbers and pointed arrows) of high energy deposits with coarse sand and mixed clay and organic matter. The layers with low values of magnetic susceptibility (especially for 1 and 2) and organic matter are interpreted as deposits of high energy sedimentary origin.

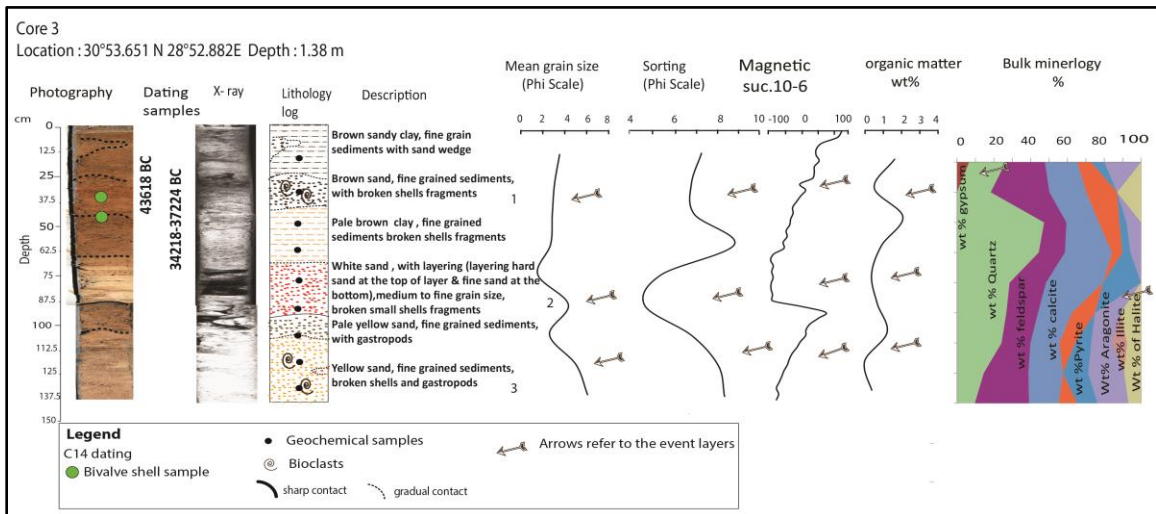

Figure S2 -3: Description of core no.3 with photography, x-ray scanning, detail description of lithology, mean grain size, sorting, total organic and inorganic matter and bulk mineralogy. The core is at located at 270 m far from the shoreline and the outlet of seawater. It reveals 3 main layers (see numbers and pointed arrows) of high energy deposits with coarse sand and mixed clay and organic matter. The layers with low values of magnetic susceptibility (especially for 1 and 2 and 3) while high value at the bottom of layer 2 and with laminations at 2 and high organic matter content are interpreted as deposits of high energy sedimentary origin.



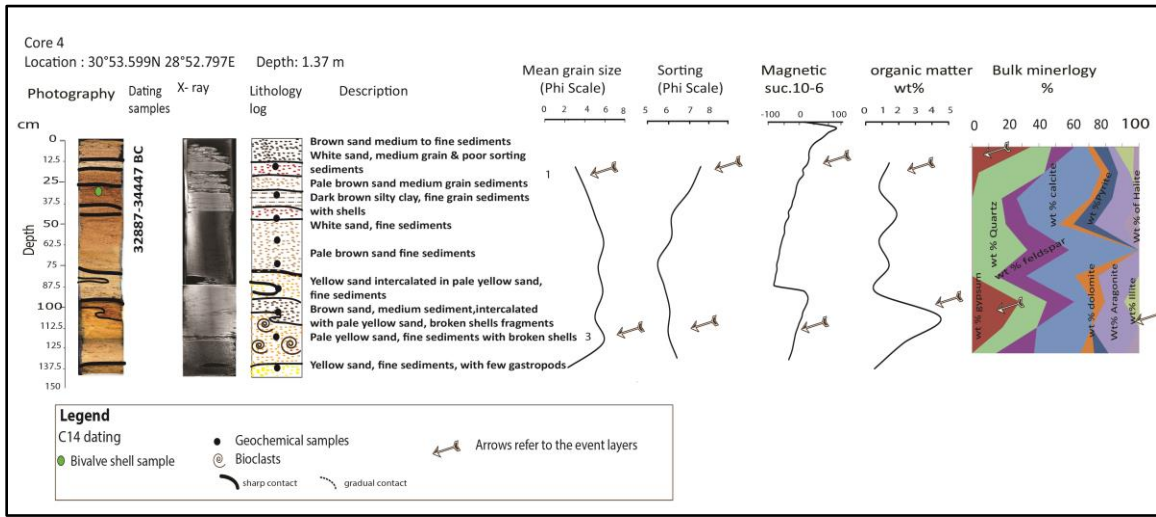

Figure S2 - 4: Description of core no.4 with photography, x-ray scanning, detail description of lithology, mean grain size, sorting, total organic and inorganic matter and bulk mineralogy. The core is at 435 m from the shoreline 166 m from the shoreline. It reveals 2 main layers (see numbers and pointed arrows) of high energy deposits with coarse sand and mixed clay and organic matter. The layers with low values of magnetic susceptibility (especially for 1 and 3) and high content organic matter are interpreted as deposits of high energy sedimentary origin.

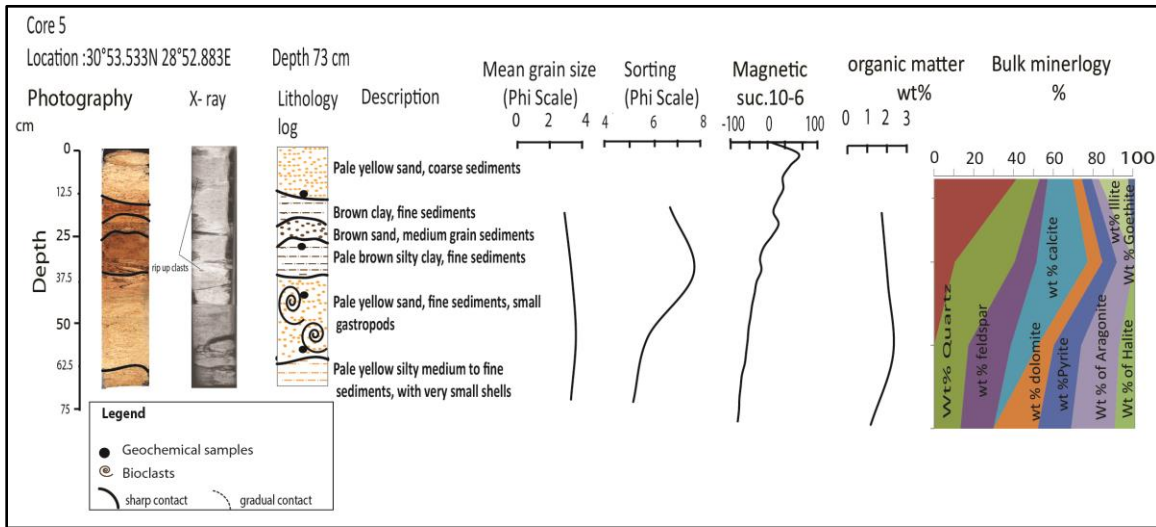

Figure S2 - 5: Description of core no.5 with photography, x-ray scanning, detail description of lithology, mean grain size, sorting, total organic and inorganic matter and bulk mineralogy. The core is at 490 m distance from the shoreline and the sedimentary succession does not show any possible sedimentary catastrophic layer of high energy sedimentary origin.

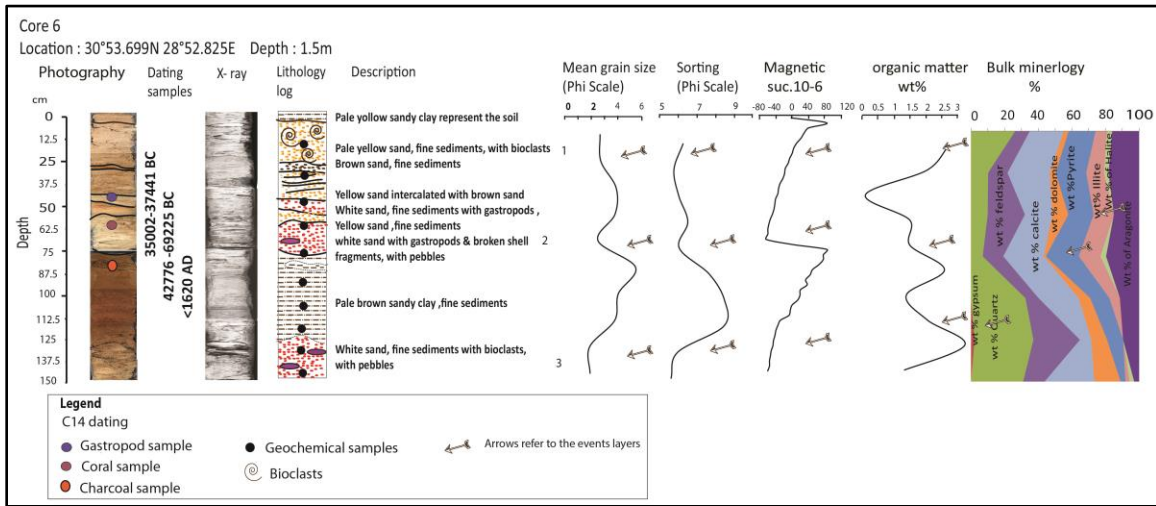

Figure S2 - 6 : Description of core no.6 with photography, x-ray scanning, detail description of lithology, mean grain size, sorting, total organic and inorganic matter and bulk mineralogy. The core is at 320 m from the shoreline and reveals 3 main layers (see numbers and pointed arrows) of high energy deposits with coarse sand and mixed clay and organic matter. The layers with low values of magnetic susceptibility and high organic matter content are interpreted as deposits of high energy sedimentary origin.

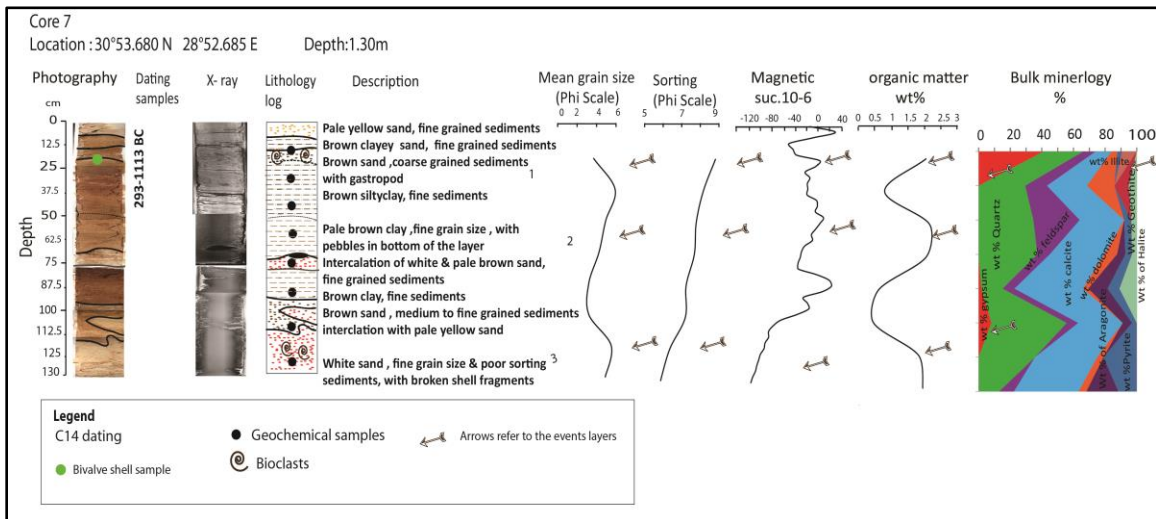

Figure S2 - 7 : Description of core no.7 with photography, x-ray scanning, detail description of lithology, mean grain size, sorting, total organic and inorganic matter and bulk mineralogy. The core is at 273 m from the shoreline and reveals 3 main layers (see numbers and pointed arrows) of high energy deposits with coarse sand and mixed clay and organic matter. The layers with low values of magnetic susceptibility (especially for 1 and 2) and high organic matter content are interpreted as deposits of high energy sedimentary origin.

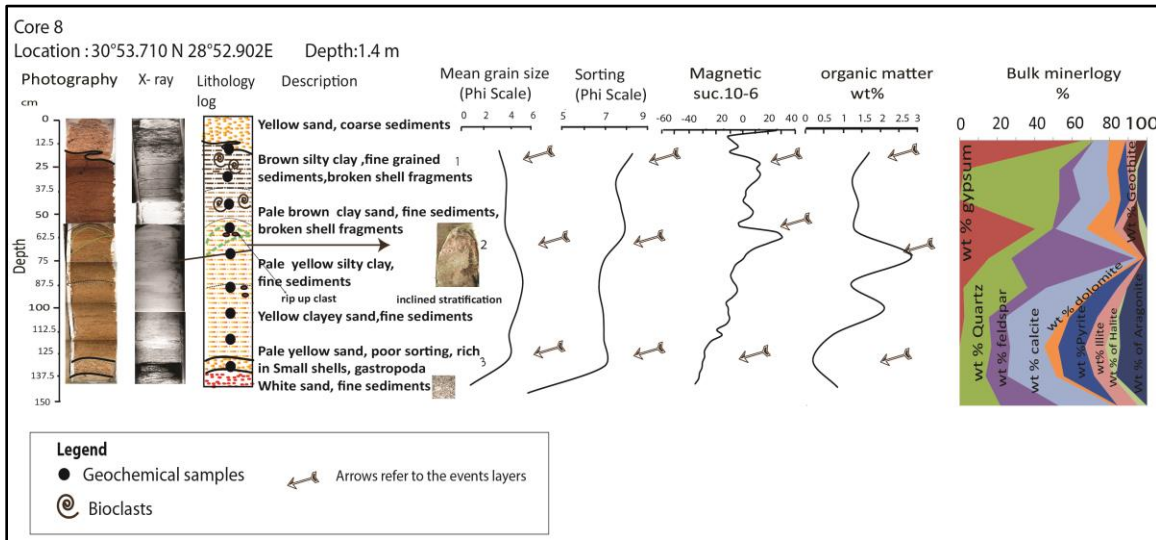

Figure S2 - 8 : Description of core no.8 with photography, x-ray scanning, detail description of lithology, mean grain size, sorting, total organic and inorganic matter and bulk mineralogy. The core is at 214 m from the shoreline and reveals 3 main layers (see numbers and pointed arrows) of high energy deposits with coarse sand and mixed clay and organic matter. The layers with high values of magnetic susceptibility (especially for 2) and organic matter are interpreted as deposits of high energy sedimentary origin.

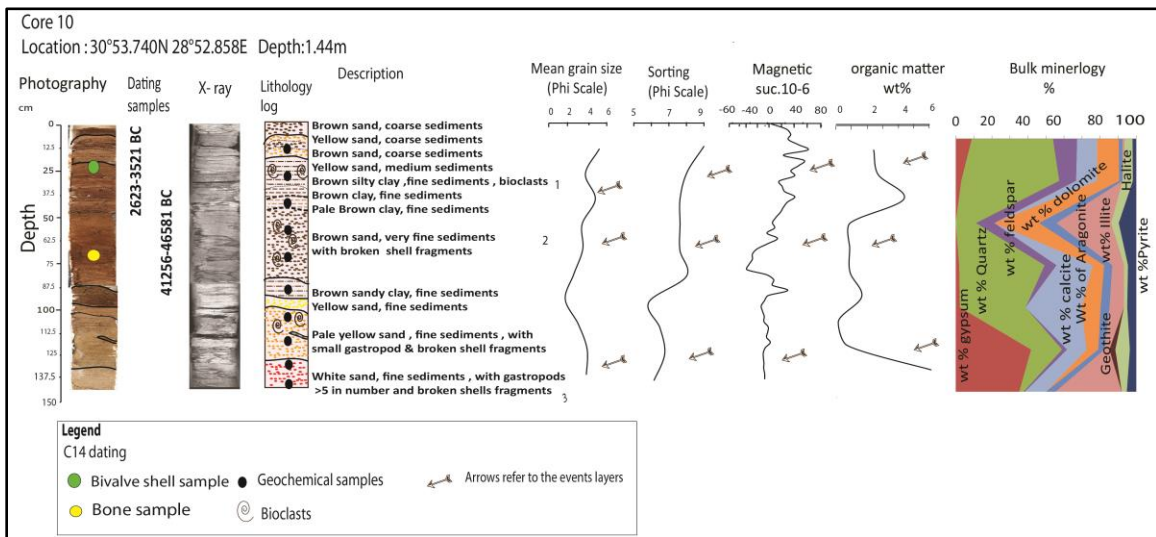

Figure S2 - 9: Description of core no.10 with photography, x-ray scanning, detail description of lithology, mean grain size, sorting, total organic and inorganic matter and bulk mineralogy. The core is at 245 m from the shoreline and reveals 3 main layers (see numbers and pointed arrows) of high energy deposits with coarse sand and mixed clay and organic matter. The layers with high values of magnetic susceptibility (especially for 1) and high organic matter content are interpreted as deposits of high energy sedimentary origin.

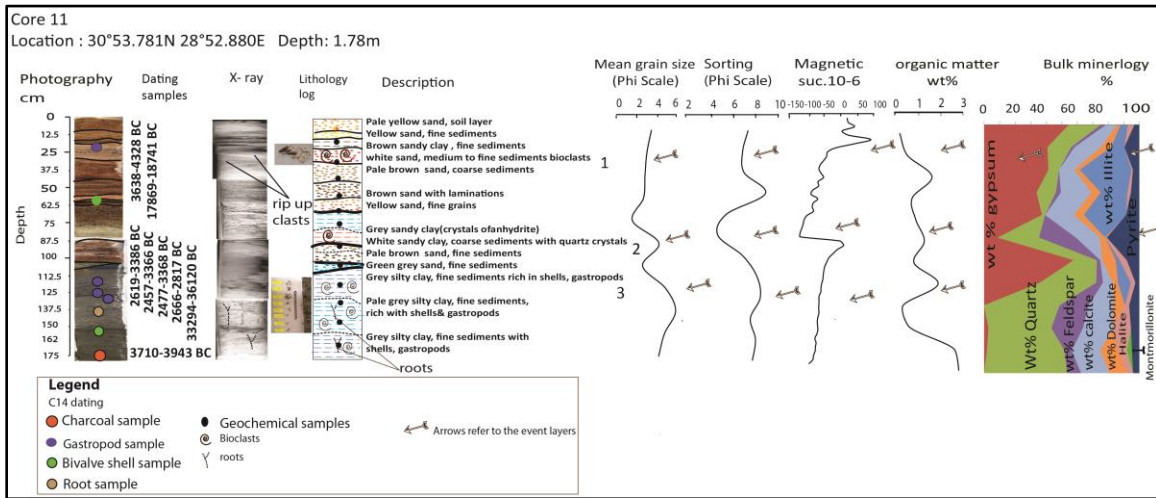

Figure S2 – 10 : Description of core no.11 with photography, x-ray scanning, detail description of lithology, mean grain size, sorting, total organic and inorganic matter and bulk mineralogy. The core is at 151 m from the shoreline and reveals 3 main layers (see numbers and pointed hands) of high energy deposits with coarse sand and mixed clay and organic matter. The layers with high values of magnetic susceptibility (especially for 1 and, base of layer 2) and high organic matter content are interpreted as deposits of high energy sedimentary origin

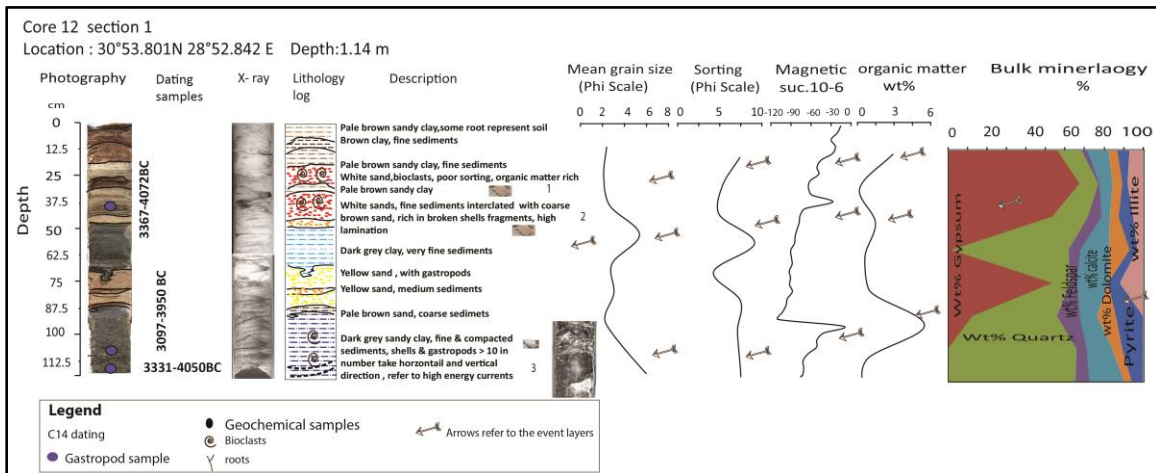

Figure S2 – 11a : Description of core no.12 section 1 with photography, x-ray scanning, detail description of lithology, mean grain size, sorting, total organic and inorganic matter and bulk mineralogy. The core is at 151 m from the shoreline and reveals 3 main layers (see numbers and pointed hands) of high energy deposits with coarse sand and mixed clay and organic matter. The layers with low values of magnetic susceptibility (especially for 1 and, 2 and 3) and organic matter are interpreted as deposits of high energy sedimentary origin.



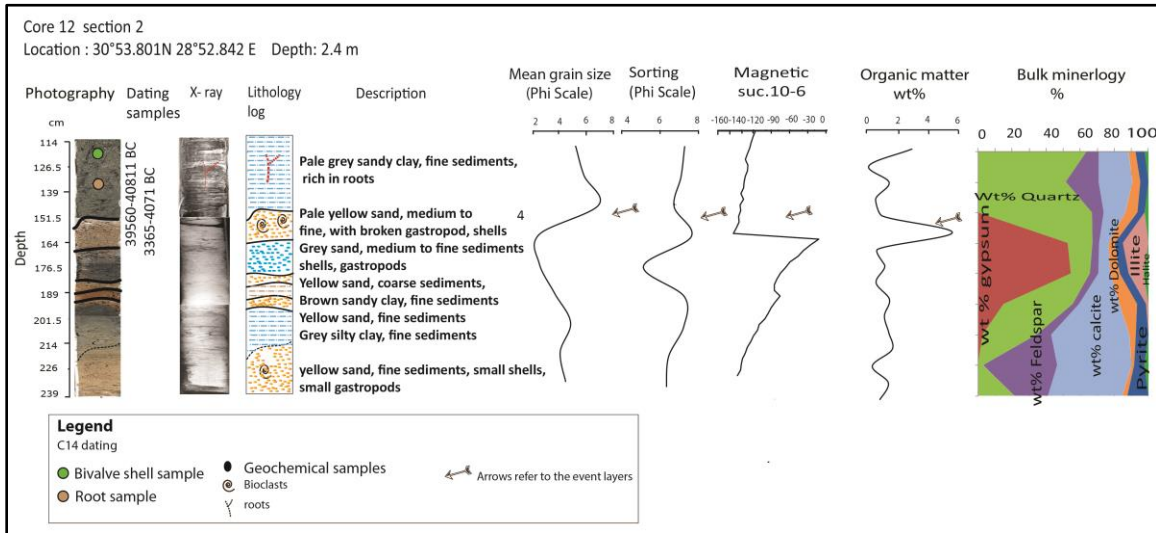

Figure S2 – 11 b : Description of core no.12 section 2 with photography, x-ray scanning, detail description of lithology, mean grain size, sorting, total organic and inorganic matter and bulk mineralogy. The fourth layer (see numbers and pointed hands) of high energy deposits with coarse sand and mixed clay and organic matter. The layers with low values of magnetic susceptibility and high organic matter content are interpreted as deposits of tsunami origin

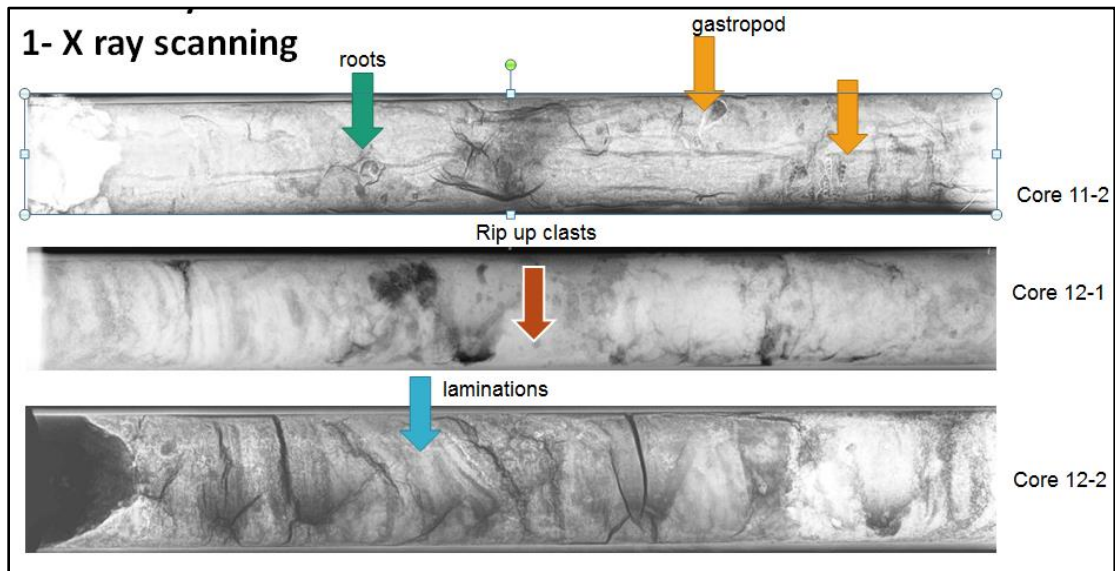

Figure S3 Turibitic features found in some core in El Alamein site by X ray scanning (rip up clasts, laminations and some gastropods before open the cores)

**Bulk mineralogy semi quantitative data**

| 2Theta | d (A)          | Height | Area   | FWHM   | Identified mineral     | WT%         |
|--------|----------------|--------|--------|--------|------------------------|-------------|
| 17     | <b>6.54906</b> | 14.1   | 24.2   | 0.1959 | Gypsum                 | 1.767138739 |
| 25.207 | 4.43635        | 10.4   | 17.9   | 0.2284 | -                      | 0           |
| 26.2   | 4.27096        | 80.4   | 224.4  | 0.2609 | -                      |             |
| 26.878 | <b>4.16509</b> | 7.3    | 20.4   | 0.2648 | Goethite               | 0.914901617 |
| 29.135 | 3.84871        | 7.3    | 20.4   | 0.2668 | -                      |             |
| 30.344 | 3.69869        | 64.1   | 174.5  | 0.2688 | -                      |             |
| 31.308 | 3.5876         | 17.6   | 47.9   | 0.3164 | -                      |             |
| 31.725 | 3.54154        | 15.6   | 42.3   | 0.3401 | -                      |             |
| 32.31  | <b>3.47908</b> | 13.5   | 36.7   | 0.352  | Aragonite              | 1.691941346 |
| 33.633 | <b>3.34596</b> | 336.5  | 1545.2 | 0.3639 | Quartz                 | 42.17320466 |
| 34.65  | <b>3.25063</b> | 130    | 597.2  | 0.3755 | Feldspar (orthoclase ) | 16.29276852 |
| 35.152 | <b>3.20569</b> | 145.5  | 668.2  | 0.3813 | Albite                 | 18.23536784 |
| 37.221 | <b>3.03326</b> | 65.9   | 338.3  | 0.3872 | Calcite                | 8.259180348 |
| 39.075 | <b>2.89461</b> | 62.2   | 304.3  | 0.3949 | dolomite               | 7.795463091 |
| 40.166 | <b>2.81908</b> | 12.5   | 60.9   | 0.3591 | Halite                 | 1.566612357 |
| 42.422 | <b>2.67551</b> | 10.4   | 50.8   | 0.3412 | Pyrite                 | 1.303421481 |
| 45.598 | 2.49811        | 17.6   | 86.1   | 0.3323 | -                      |             |
| 46.356 | 2.45949        | 46.7   | 181.3  | 0.3233 | -                      |             |
| 47.353 | 2.41057        | 9.4    | 36.4   | 0.312  | -                      |             |
| 48.189 | 2.37119        | 9.4    | 36.4   | 0.3063 | -                      |             |
| 50.147 | 2.28426        | 50.2   | 165.7  | 0.3006 | -                      |             |
| Total  |                | 797.9  |        |        |                        |             |

Table S1-1 X ray diffraction data of core 1 sample no.1

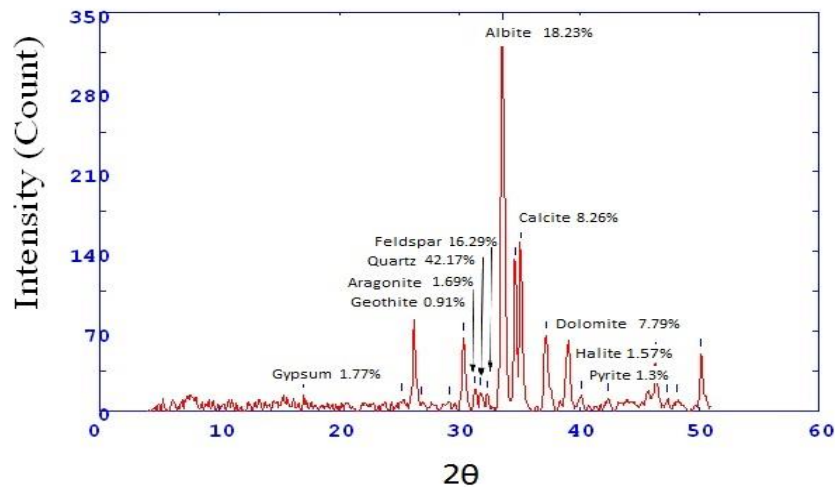

Fig.S4-1 X ray diffractogram of core 1 sample no.1

| 2Theta | d (A)           | Height | Area  | FWHM   | Identified mineral     | WT%         |
|--------|-----------------|--------|-------|--------|------------------------|-------------|
| 11.008 | <b>10.09211</b> | 13.1   | 74.7  | 0.3574 | Illite                 | 3.116821318 |
| 24.681 | 4.52938         | 12.6   | 51.4  | 0.3356 | -                      | 0           |
| 26.207 | 4.26987         | 30.8   | 97.7  | 0.2652 | -                      |             |
| 27.931 | 4.0111          | 7.6    | 24.3  | 0.2974 | -                      |             |
| 29.077 | 3.85612         | 21.4   | 90.1  | 0.3297 | -                      |             |
| 30.351 | <b>3.69791</b>  | 10.6   | 44.6  | 0.2948 | Aragonite              | 2.522008089 |
| 33.57  | <b>3.35211</b>  | 154.2  | 353.1 | 0.26   | Quartz                 | 36.68807994 |
| 34.523 | <b>3.26222</b>  | 24.6   | 56.2  | 0.3908 | Feldspar (orthoclase ) | 5.85296217  |
| 35.108 | <b>3.2096</b>   | 14.4   | 33    | 0.4562 | Albite                 | 3.426124197 |
| 37.22  | <b>3.03336</b>  | 139.9  | 945.6 | 0.5217 | Calcite                | 33.28574828 |
| 39.053 | <b>2.89614</b>  | 40     | 215.2 | 0.4159 | dolomite               | 9.517011658 |
| 40.031 | <b>2.82818</b>  | 11.9   | 63.9  | 0.3186 | Halite                 | 9.517011658 |
| 41.875 | <b>2.70891</b>  | 11.6   | 26.4  | 0.2213 | Pyrite                 | 2.759933381 |
| 45.7   | 2.49284         | 32.8   | 355.3 | 0.9235 | -                      |             |
| 47.208 | 2.41755         | 15.3   | 165.4 | 0.5999 | -                      |             |
| Total  |                 | 420.3  |       |        |                        |             |

Table S1-2 X ray diffraction data of core 1 sample no.2

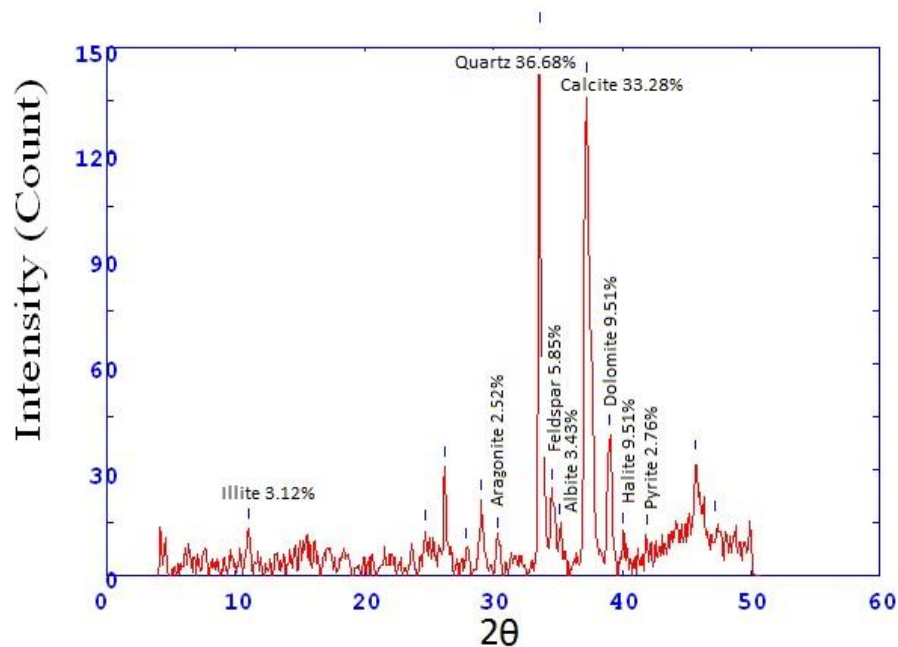

Fig.S4-2 X ray diffractogram of core 1 sample no.2

| 2Theta | d (A)          | Height | Area  | FWHM   | Identified mineral     | WT%         |
|--------|----------------|--------|-------|--------|------------------------|-------------|
| 15.408 | <b>7.22089</b> | 12.4   | 89.9  | 0.5334 | Gypsum                 | 1.651571657 |
| 24.948 | 4.4817         | 10.4   | 75.3  | 0.3984 | -                      | 0           |
| 26.212 | 4.26897        | 70.9   | 212.5 | 0.2634 | -                      |             |
| 29.054 | 3.85916        | 16.6   | 49.8  | 0.2498 | -                      |             |
| 30.366 | 3.69605        | 32.8   | 82.5  | 0.2363 | -                      |             |
| 31.326 | <b>3.58558</b> | 21.8   | 54.7  | 0.2368 | Aragonite              | 2.903569526 |
| 33.592 | <b>3.35</b>    | 325.3  | 699.6 | 0.2373 | Quartz                 | 43.32711774 |
| 34.646 | <b>3.25106</b> | 133.2  | 286.5 | 0.33   | Feldspar (orthoclase ) | 17.74107619 |
| 37.218 | <b>3.03354</b> | 196.2  | 948.1 | 0.4227 | Calcite                | 26.13212573 |
| 39.072 | <b>2.8948</b>  | 61.9   | 261.7 | 0.3479 | dolomite               | 8.244539158 |
| 45.633 | 2.49629        | 27.2   | 406.4 | 0.9975 | -                      |             |
| 46.266 | 2.464          | 24.9   | 371.7 | 0.7214 | -                      | 0           |
| 48.712 | 2.34725        | 10.4   | 155.6 | 0.5833 | -                      |             |
| 50.15  | 2.28412        | 43.5   | 242   | 0.4452 | -                      |             |
| 51.246 | 2.23847        | 12.5   | 0     | 0      | -                      |             |
| 52.207 | 2.20008        | 11.4   | 0     | 0      | -                      |             |
| Total  |                | 750    |       |        |                        |             |

Table S1-3 X ray diffraction data of core 1 sample no.3

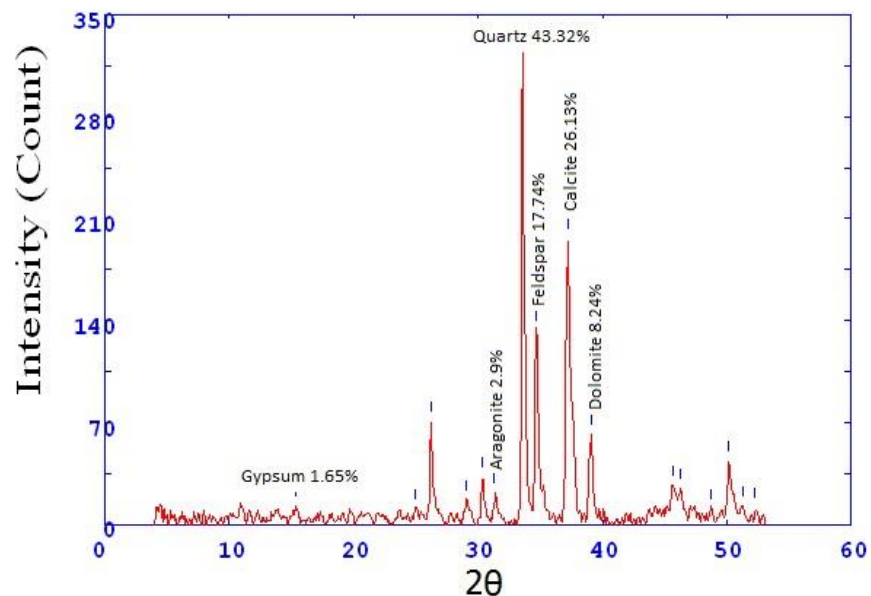

Fig.S4-3 X ray diffractogram of core 1 sample no.3

| 2Theta | d (A)   | Height | Area   | FWHM   | Identified mineral     | WT%         |
|--------|---------|--------|--------|--------|------------------------|-------------|
| 15.354 | 7.24607 | 15.8   | 72     | 0.4291 | Gypsum                 | 2.243362204 |
| 26.29  | 4.25668 | 39.8   | 142.2  | 0.3088 | -                      | 0           |
| 29.193 | 3.84117 | 24.4   | 87.4   | 0.2846 | -                      |             |
| 30.473 | 3.68344 | 36.3   | 87.5   | 0.2604 | -                      |             |
| 31.586 | 3.55673 | 16.6   | 40.1   | 0.2581 | Aragonite              | 2.356950163 |
| 33.704 | 3.33918 | 315    | 700.4  | 0.2558 | Quartz                 | 44.72525912 |
| 34.749 | 3.24171 | 73.1   | 162.7  | 0.353  | Feldspar (orthoclase ) | 10.37909982 |
| 35.347 | 3.18855 | 36.1   | 80.3   | 0.4016 | Albite                 | 5.12565668  |
| 37.347 | 3.02339 | 185.6  | 1102.9 | 0.4502 | Calcite                | 26.35240664 |
| 39.207 | 2.88523 | 62.1   | 304.6  | 0.3948 | dolomite               | 8.81726537  |
| 43.033 | 2.6393  | 16.8   | 38.6   | 0.2072 | -                      |             |
| 45.94  | 2.48052 | 28     | 202.3  | 0.5829 | -                      |             |
| 46.373 | 2.45864 | 21.5   | 155.5  | 0.536  | -                      |             |
| 50.333 | 2.27634 | 37     | 263    | 0.4891 | -                      |             |
| 51.415 | 2.23159 | 8.8    | 0      | 0      | -                      |             |
| Total  |         | 703.1  |        |        |                        |             |

Table S1-4 X ray diffraction data of core 1 sample no.4

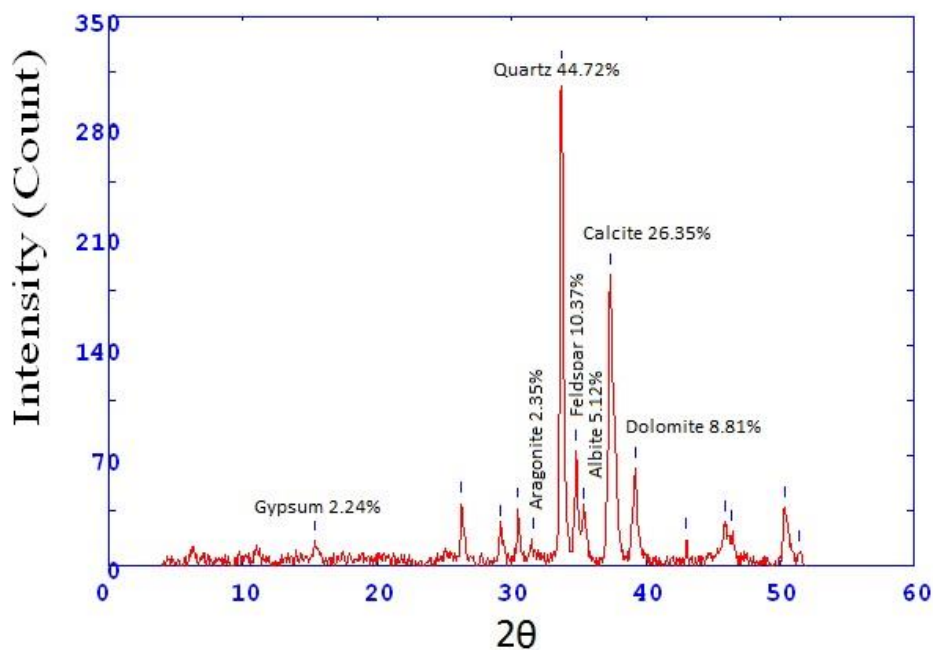

Fig.S4-4 X ray diffractogram of core 1 sample no.4

| 2Theta | d (A)          | Height | Area   | FWHM   | Identified mineral     | WT%         |
|--------|----------------|--------|--------|--------|------------------------|-------------|
| 17.139 | <b>6.49624</b> | 16.5   | 47.7   | 0.2592 | Gypsum                 | 2.160534241 |
| 23.727 | 4.70878        | 8.4    | 24.2   | 0.2634 | -                      | 0           |
| 24.966 | 4.47848        | 11.5   | 33.2   | 0.2654 | -                      |             |
| 26.259 | 4.26147        | 50.3   | 144.7  | 0.2675 | -                      |             |
| 27.692 | 4.04493        | 9.4    | 27.2   | 0.2481 | -                      |             |
| 29.097 | 3.85359        | 9.4    | 27.2   | 0.2288 | -                      |             |
| 30.417 | 3.6901         | 60     | 63.5   | 0.1901 | -                      |             |
| 31.328 | <b>3.58535</b> | 20.9   | 22.1   | 0.2439 | Aragonite              | 2.736676706 |
| 33.633 | <b>3.34595</b> | 331.6  | 1301.9 | 0.2978 | Quartz                 | 43.42019117 |
| 34.798 | <b>3.23728</b> | 178.9  | 702.5  | 0.3642 | Feldspar (orthoclase ) | 23.42542883 |
| 35.294 | <b>3.19323</b> | 37.5   | 147.3  | 0.3974 | Albite                 | 4.910305094 |
| 37.244 | <b>3.03148</b> | 122.2  | 626.1  | 0.4307 | Calcite                | 16.00104753 |
| 39.1   | <b>2.89278</b> | 56.1   | 366.2  | 0.4861 | dolomite               | 7.34581642  |
| 42     | <b>2.70119</b> | 21     | 89.7   | 0.3611 | Pyrite                 | 2.749770852 |
| 45.748 | 2.49039        | 27.2   | 218.7  | 0.6017 | -                      |             |
| 46.365 | 2.45903        | 18.8   | 151.4  | 0.5858 | -                      |             |
| 48.1   | 2.37531        | 13.6   | 100    | 0.57   | -                      |             |
| 50.244 | 2.28014        | 30.8   | 93     | 0.3152 | -                      | 0           |
| Total  |                | 763.7  |        |        |                        |             |

Table S1-5 X ray diffraction data of core 1 sample no.5

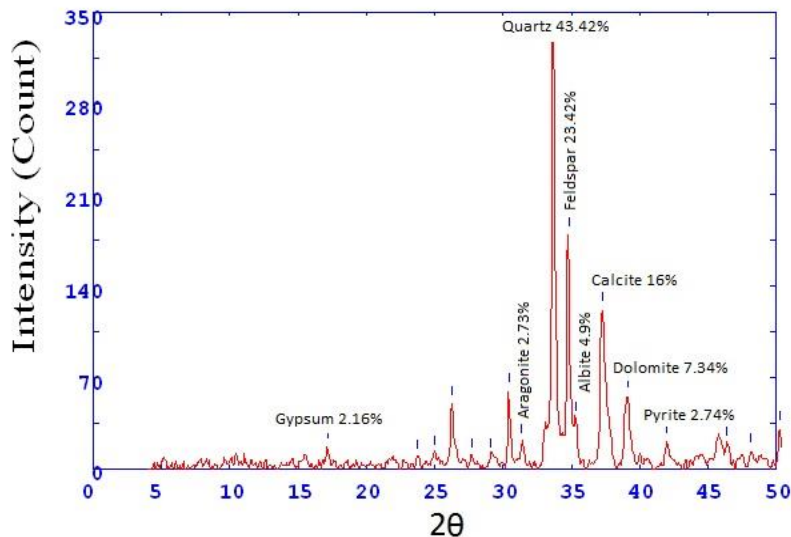

Fig.S4-5 X ray diffractogram of core 1 sample no.5

| 2Theta | d (A)          | Height | Area  | FWHM   | Identified mineral     | WT%         |
|--------|----------------|--------|-------|--------|------------------------|-------------|
| 14.926 | <b>7.4528</b>  | 140.2  | 268.1 | 0.2051 | Gypsum                 | 23.04404997 |
| 24.139 | 4.62956        | 9.8    | 18.7  | 0.2147 | -                      |             |
| 25.181 | 4.44076        | 8.8    | 16.9  | 0.2243 | -                      | 0           |
| 25.877 | 4.32342        | 10.8   | 20.6  | 0.2435 | -                      |             |
| 26.652 | <b>4.19975</b> | 58     | 176.9 | 0.2819 | Goethite               | 9.533201841 |
| 29.9   | 3.75237        | 48.7   | 138.5 | 0.2685 | -                      |             |
| 30.83  | <b>3.64184</b> | 30.2   | 85.9  | 0.2611 | Aragonite              | 4.963839579 |
| 33.436 | <b>3.3651</b>  | 36     | 102.5 | 0.2574 | Quartz                 | 5.917159763 |
| 34.005 | 3.31046        | 305.5  | 866.3 | 0.2537 | -                      |             |
| 35.087 | <b>3.21139</b> | 39.9   | 113.2 | 0.3511 | Feldspar (orthoclase ) | 6.558185404 |
| 35.696 | <b>3.15841</b> | 28.2   | 80.1  | 0.3998 | Albite                 | 4.635108481 |
| 37.661 | <b>2.99911</b> | 150.7  | 858   | 0.4485 | Calcite                | 24.76988823 |
| 39.435 | <b>2.86922</b> | 79.8   | 607.4 | 0.4946 | dolomite               | 13.11637081 |
| 40.388 | <b>2.80423</b> | 17.6   | 133.6 | 0.4097 | Halite                 | 2.892833662 |
| 42.3   | <b>2.68291</b> | 27.8   | 122.1 | 0.3247 | Pyrite                 | 4.569362262 |
| 46.2   | 2.46732        | 31.1   | 192   | 0.4667 | -                      |             |
| 46.818 | 2.43654        | 21.4   | 132.4 | 0.3899 | -                      |             |
| Total  |                | 608.4  |       |        |                        |             |

Table S1-6 X ray diffraction data of core 1 sample no.6

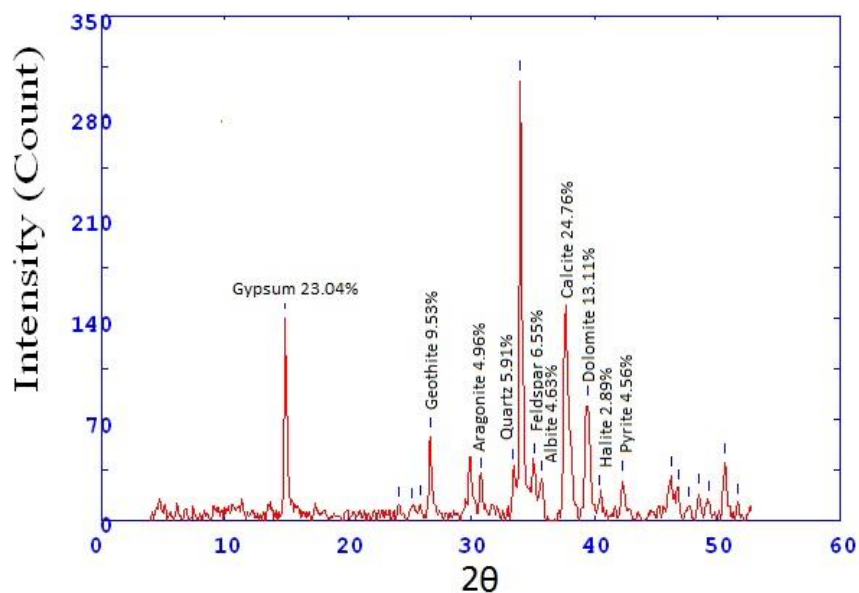

Fig.S4-6 X ray diffractogram of core 1 sample no.6



| 2Theta | d (A)          | Height | Area  | FWHM   | Identified mineral     | WT%         |
|--------|----------------|--------|-------|--------|------------------------|-------------|
| 15.414 | <b>7.21807</b> | 11.4   | 94.4  | 0.8724 | Gypsum                 | 2.366618227 |
| 19.4   | 5.74515        | 8.2    | 94.4  | 0.8724 | -                      |             |
| 21.267 | 5.24597        | 7.9    | 27.1  | 0.1957 | -                      |             |
| 22.609 | 4.93835        | 8.8    | 22.9  | 0.148  | -                      |             |
| 24.888 | 4.49223        | 10.4   | 27.2  | 0.2573 | -                      |             |
| 26.255 | 4.26213        | 26.7   | 123.3 | 0.3665 | -                      |             |
| 29.195 | 3.84093        | 19.3   | 85.8  | 0.3034 | -                      | 0           |
| 30.36  | 3.69679        | 9.4    | 41.6  | 0.2881 | -                      |             |
| 33.055 | <b>3.40278</b> | 35.8   | 158.8 | 0.2805 | Aragonite              | 7.432011625 |
| 33.631 | <b>3.34617</b> | 141.8  | 414.4 | 0.2729 | Quartz                 | 29.43740918 |
| 34.689 | <b>3.24714</b> | 30.1   | 87.9  | 0.3337 | Feldspar (orthoclase ) | 6.248702512 |
| 35.424 | <b>3.18185</b> | 24.9   | 72.8  | 0.364  | Albite                 | 5.169192443 |
| 37.29  | <b>3.02783</b> | 165    | 698.5 | 0.3944 | Calcite                | 34.25368487 |
| 39.134 | <b>2.89041</b> | 47.8   | 334.5 | 0.5099 | dolomite               | 9.923188707 |
| 42.034 | <b>2.69908</b> | 24.9   | 136.3 | 0.4053 | Pyrite                 | 5.169192443 |
| 45.792 | 2.48812        | 42.1   | 253.4 | 0.4755 | -                      |             |
| Total  |                | 481.7  |       |        |                        |             |

Table S1-7 X ray diffraction data of core 1 sample no.7

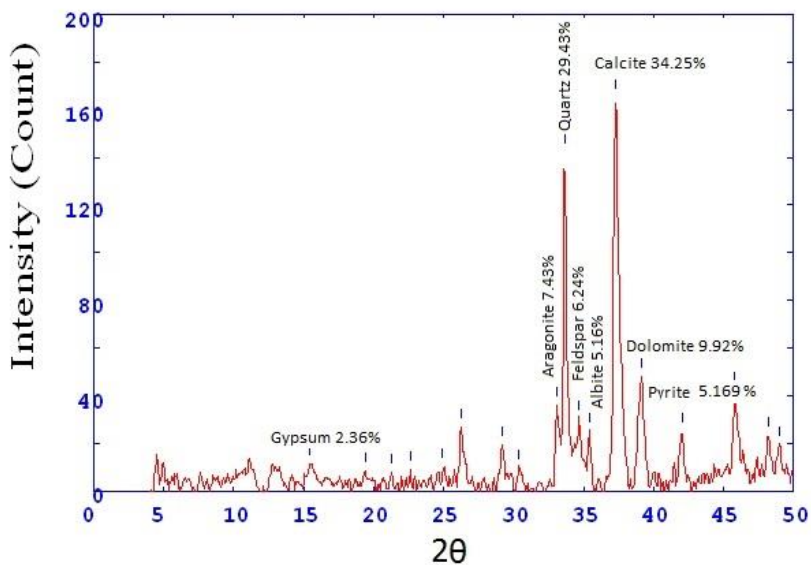

Fig.S4-7 X ray diffractogram of core 1 sample no.7

| 2Theta | d (A)          | Height | Area  | FWHM   | Identified mineral     | WT%         |
|--------|----------------|--------|-------|--------|------------------------|-------------|
| 26.28  | 4.25817        | 25.9   | 106.1 | 0.3271 | -                      |             |
| 29.132 | 3.84901        | 18.3   | 102   | 0.4633 | -                      |             |
| 29.949 | 3.74633        | 12.9   | 71.7  | 0.3677 | -                      | 0           |
| 30.416 | 3.69012        | 12.9   | 71.7  | 0.3199 | -                      |             |
| 33.126 | <b>3.39576</b> | 49.5   | 276.4 | 0.296  | Aragonite              | 10.8220376  |
| 33.644 | <b>3.34495</b> | 109.6  | 390.4 | 0.2721 | Quartz                 | 23.96152164 |
| 34.527 | <b>3.26188</b> | 29.7   | 106   | 0.3281 | Feldspar (orthoclase ) | 6.493222562 |
| 35.088 | <b>3.21137</b> | 21.6   | 76.9  | 0.356  | Albite                 | 4.722343682 |
| 37.262 | <b>3.03002</b> | 183    | 884.9 | 0.384  | Calcite                | 40.00874508 |
| 39.011 | <b>2.89913</b> | 33.8   | 163.6 | 0.3723 | dolomite               | 7.389593354 |
| 41.948 | <b>2.70441</b> | 30.2   | 129.8 | 0.3606 | Pyrite                 | 6.602536073 |
| 44.144 | 2.57606        | 10.1   | 40.9  | 0.3333 | -                      |             |
| 45.789 | 2.48828        | 43.3   | 213.1 | 0.3939 | -                      |             |
| 48.033 | 2.37842        | 20.3   | 107.9 | 0.4705 | -                      |             |
| 48.821 | 2.34234        | 14.6   | 77.5  | 0.464  | -                      |             |
| Total  | 457.4          |        |       |        |                        |             |

Table S1-8 X ray diffraction data of core 1 sample no.8

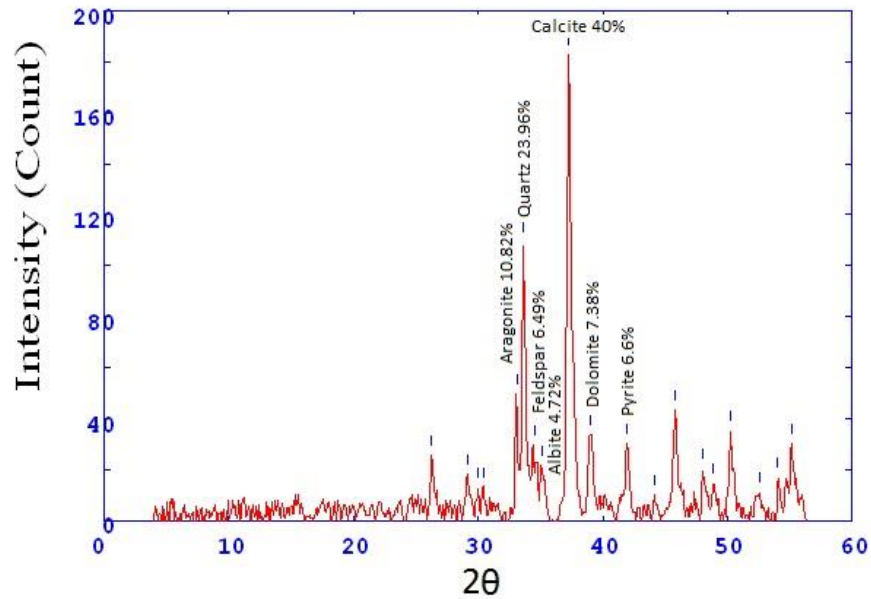

Fig.S4-8 X ray diffractogram of core 1 sample no.8

| 2Theta | d (A)          | Height | Area  | FWHM   | Identified mineral     | WT%         |
|--------|----------------|--------|-------|--------|------------------------|-------------|
| 13.14  | <b>8.46016</b> | 20.7   | 66.9  | 0.2986 | Illite                 | 2.920428894 |
| 14.542 | <b>7.64853</b> | 147.8  | 273.4 | 0.2206 | Gypsum                 | 20.85214447 |
| 26.178 | 4.2745         | 31.5   | 90.1  | 0.2721 | -                      |             |
| 28.299 | 3.95992        | 9      | 25.6  | 0.3067 | -                      |             |
| 29.403 | 3.81438        | 32.2   | 122.1 | 0.3414 | -                      | 0           |
| 30.366 | 3.69609        | 23.1   | 146.9 | 0.4859 | -                      |             |
| 31.9   | 3.52268        | 11.8   | 100.5 | 0.7569 | -                      |             |
| 32.959 | <b>3.41251</b> | 26.8   | 227.2 | 0.5136 | Aragonite              | 3.781038375 |
| 33.559 | <b>3.35317</b> | 205.7  | 585.9 | 0.2703 | Quartz                 | 29.02088036 |
| 34.543 | <b>3.26045</b> | 24     | 68.4  | 0.2693 | Feldspar (orthoclase ) | 3.386004515 |
| 35.288 | <b>3.19374</b> | 64.2   | 184.6 | 0.2684 | Albite                 | 9.057562077 |
| 37.212 | <b>3.03401</b> | 165.2  | 979.9 | 0.4741 | Calcite                | 23.30699774 |
| 39.087 | <b>2.89373</b> | 26.1   | 149.9 | 0.4795 | dolomite               | 3.68227991  |
| 39.947 | <b>2.83387</b> | 11.2   | 64.3  | 0.5949 | Halite                 | 1.58013544  |
| 41.903 | <b>2.70715</b> | 17.1   | 157.3 | 0.7103 | Pyrite                 | 2.412528217 |
| 43.866 | 2.59161        | 9.6    | 70.6  | 0.5639 | -                      |             |
| 45.737 | 2.49095        | 33.2   | 187.6 | 0.4583 | -                      |             |
| Total  | 708.8          |        |       |        |                        |             |

Table S1-9 X ray diffraction data of core 1 sample no.9

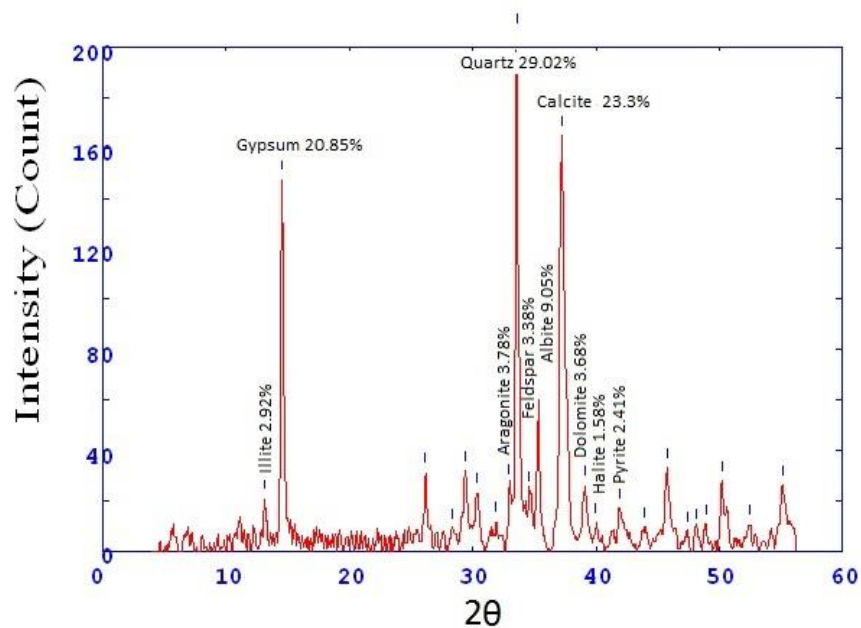

Fig.S4-9 X ray diffractogram of core 1 sample no.9

| 2Theta | d (A)          | Height | Area  | FWHM   | Identified mineral     | WT%         |
|--------|----------------|--------|-------|--------|------------------------|-------------|
| 13.156 | <b>8.45006</b> | 23.1   | 60.7  | 0.2354 | Illite                 | 2.946052799 |
| 14.538 | <b>7.65071</b> | 238.4  | 465.5 | 0.2324 | Gypsum                 | 30.40428517 |
| 23.702 | 4.71352        | 10     | 52.5  | 0.4071 | -                      |             |
| 26.2   | 4.271          | 35.7   | 193.4 | 0.4343 | -                      |             |
| 29.422 | 3.812          | 43.7   | 129.9 | 0.3166 | -                      |             |
| 30.363 | 3.69645        | 13.7   | 40.7  | 0.267  | -                      | 0           |
| 31.322 | 3.58594        | 24.6   | 54.1  | 0.2174 | -                      |             |
| 32.876 | <b>3.42085</b> | 52.4   | 114.9 | 0.2426 | Aragonite              | 6.682821069 |
| 33.59  | <b>3.35019</b> | 76.2   | 225.2 | 0.2678 | Quartz                 | 9.718148195 |
| 34.626 | <b>3.25281</b> | 212.3  | 418.3 | 0.2266 | Feldspar (orthoclase ) | 27.07562811 |
| 37.218 | <b>3.03355</b> | 135.8  | 993.3 | 0.6056 | Calcite                | 17.31921949 |
| 38.994 | <b>2.9004</b>  | 16.7   | 135.2 | 0.5603 | dolomite               | 2.129830379 |
| 41.867 | <b>2.7094</b>  | 29.2   | 121.8 | 0.3559 | Pyrite                 | 3.724014794 |
| 45.747 | 2.49042        | 31.2   | 182.2 | 0.4542 | -                      |             |
| 48.05  | 2.37766        | 17.6   | 56.4  | 0.2938 | -                      |             |
| 48.85  | 2.34102        | 15.2   | 48.9  | 0.4407 | -                      |             |
| 50.217 | 2.28129        | 25.1   | 191.3 | 0.5876 | -                      |             |
| Total  | 784.1          |        |       |        |                        |             |

Table S1-10 X ray diffraction data of core 1 sample no.10

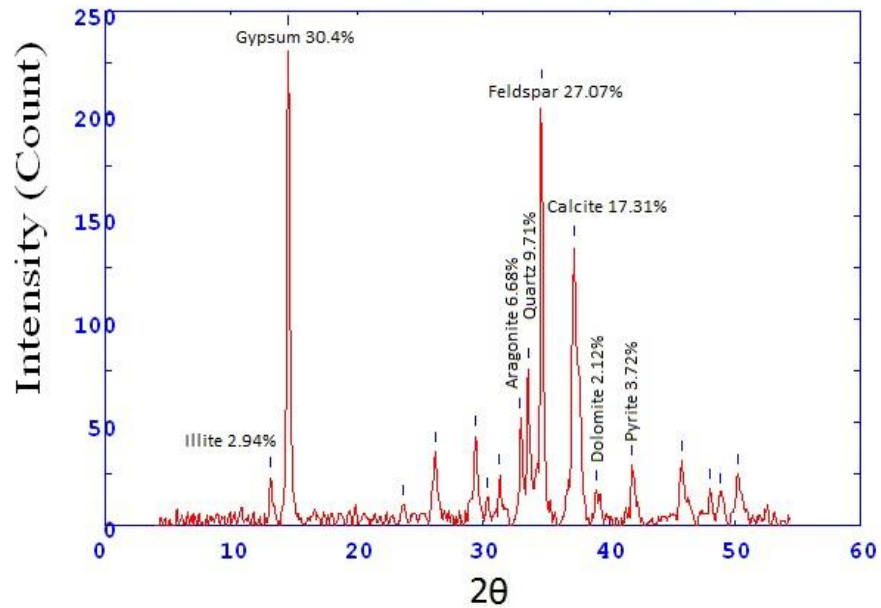

Fig.S4-10 X ray diffractogram of core 1 sample no.10

| 2Theta | d (A)          | Height | Area   | FWHM   | Identified mineral     | WT%         |
|--------|----------------|--------|--------|--------|------------------------|-------------|
| 13.205 | <b>8.41877</b> | 22.2   | 530.9  | 0.2312 | Illite                 | 2.735000616 |
| 14.584 | <b>7.62644</b> | 260.8  | 530.9  | 0.2312 | Gypsum                 | 32.13009733 |
| 26.258 | 4.26164        | 25     | 103.6  | 0.3613 | -                      | -           |
| 29.473 | 3.80552        | 57.8   | 122.5  | 0.2422 | -                      | -           |
| 30.302 | 3.70367        | 19.7   | 41.8   | 0.2409 | -                      | -           |
| 32.926 | <b>3.41576</b> | 55     | 116.6  | 0.2403 | Aragonite              | 6.775902427 |
| 33.645 | <b>3.34479</b> | 218.1  | 468.5  | 0.2396 | Quartz                 | 26.86953308 |
| 34.45  | <b>3.26898</b> | 40.2   | 86.5   | 0.4538 | Feldspar (orthoclase ) | 4.952568683 |
| 35.381 | <b>3.1856</b>  | 16.5   | 35.4   | 0.5609 | Albite                 | 2.032770728 |
| 37.272 | <b>3.02925</b> | 130.5  | 1114.7 | 0.668  | Calcite                | 16.07736849 |
| 38.936 | <b>2.90455</b> | 25.5   | 217.7  | 0.5544 | dolomite               | 3.141554762 |
| 41.893 | <b>2.7078</b>  | 42.9   | 244.3  | 0.4409 | Pyrite                 | 5.285203893 |
| 45.807 | 2.48735        | 34     | 256.5  | 0.5778 | -                      | -           |
| 48.119 | 2.37443        | 25.2   | 112.3  | 0.3778 | -                      | -           |
| Total  | 811.7          |        |        |        |                        |             |

Table S1-11 X ray diffraction data of core 1 sample no.11

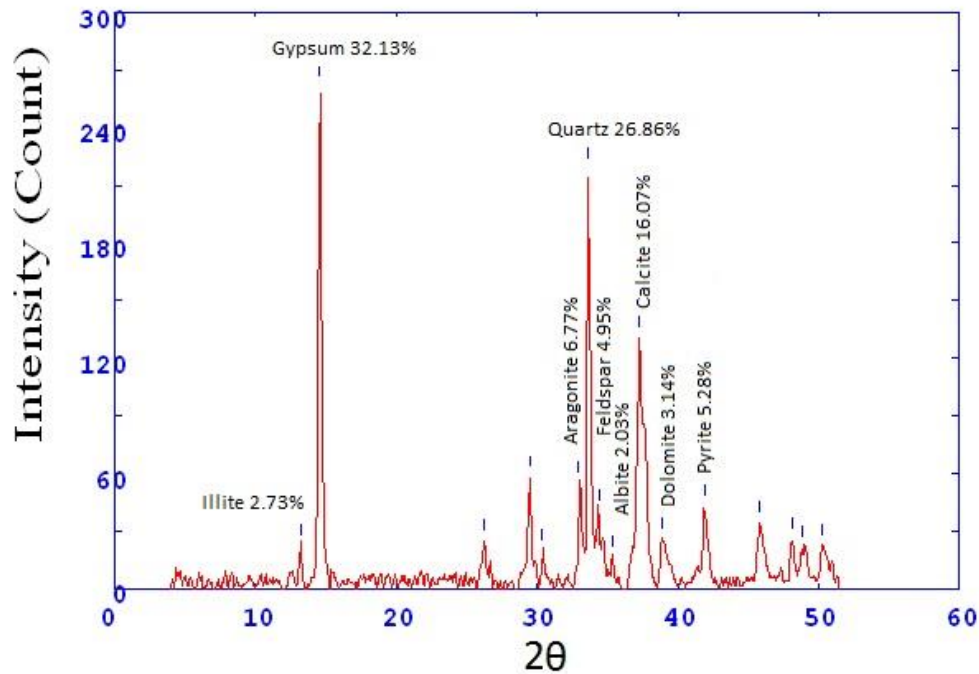

Fig.S4-11 X ray diffractogram of core 1 sample no.11

| 2Theta | d (A)   | Height | Area   | FWHM   | Identified mineral     | WT%         |
|--------|---------|--------|--------|--------|------------------------|-------------|
| 29.074 | 3.85656 | 27.6   | 79.1   | 0.283  | Aragonite              | 3.998261625 |
| 33.634 | 3.34594 | 27.8   | 126.2  | 0.3931 | Quartz                 | 4.027234536 |
| 35.078 | 3.21223 | 29.9   | 97.3   | 0.3157 | Feldspar (orthoclase ) | 4.331450094 |
| 37.244 | 3.03147 | 249.1  | 988.7  | 0.3364 | Calcite                | 36.08575981 |
| 38.804 | 2.91402 | 323.7  | 1038.5 | 0.3192 | dolomite               | 46.89265537 |
| 39.995 | 2.83066 | 17.6   | 56.4   | 0.3824 | -                      | -           |
| 42.101 | 2.695   | 14.6   | 86.6   | 0.4457 | pyrite                 | 2.115022454 |
| 45.716 | 2.492   | 28.2   | 204.7  | 0.5439 | -                      | -           |
| 47.068 | 2.42434 | 12.4   | 90.3   | 0.4881 | -                      | -           |
| 50.233 | 2.28058 | 44.5   | 240.6  | 0.4322 | -                      | -           |
| 52     | 2.20822 | 28     | 135.6  | 0.3539 | -                      | -           |
| 55.133 | 2.09175 | 33.5   | 227.8  | 0.5053 | -                      | -           |
| Total  | 690.3   |        |        |        |                        |             |

Table S1-12 X ray diffraction data of core 1 sample no.12

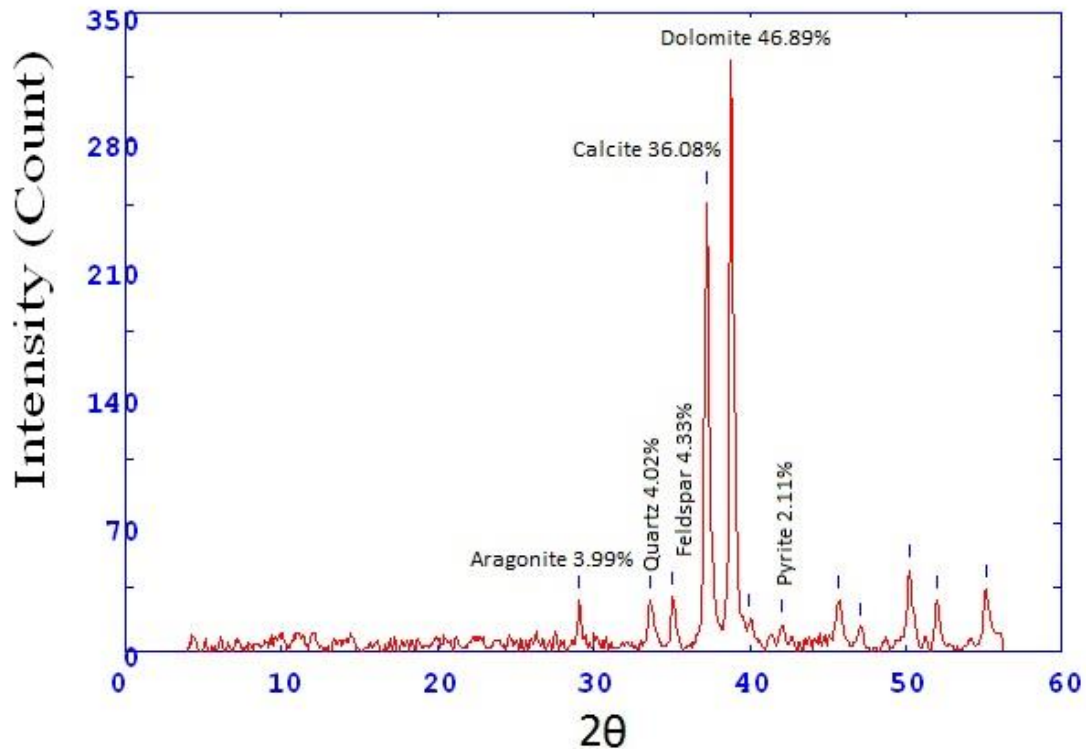

Fig.S4-12 X ray diffractogram of core 1 sample no.12

| 2Theta | d (Å)          | Height | Area   | FWHM   | Identified mineral     | WT%         |
|--------|----------------|--------|--------|--------|------------------------|-------------|
| 29.053 | 3.85937        | 19.5   | 87.4   | 0.3652 | -                      | -           |
| 29.973 | <b>3.74342</b> | 13.9   | 62.4   | 0.3875 | Aragonite              | 2.302849569 |
| 33.529 | <b>3.35605</b> | 21.5   | 97.3   | 0.4098 | Quartz                 | 3.561961564 |
| 35.011 | <b>3.21819</b> | 60.4   | 189.9  | 0.2922 | Feldspar (orthoclase ) | 10.00662691 |
| 37.167 | <b>3.03757</b> | 154.5  | 744.2  | 0.3605 | Calcite                | 25.59642147 |
| 38.833 | <b>2.9119</b>  | 341.2  | 2226.2 | 0.4437 | dolomite               | 56.52750166 |
| 42.017 | <b>2.70017</b> | 12.1   | 70.7   | 0.4667 | Pyrite                 | 2.004638834 |
| 44.284 | 2.56835        | 7.5    | 43.9   | 0.4824 | -                      | -           |
| 45.674 | 2.4942         | 17.4   | 109.5  | 0.4981 | -                      | -           |
| 47.074 | 2.42405        | 17.9   | 71.5   | 0.3496 | -                      | -           |
| 50.09  | 2.28668        | 28     | 143.2  | 0.4343 | -                      | -           |
| 51.989 | 2.20866        | 42.9   | 175.5  | 0.3811 | -                      | -           |
| Total  | 603.6          |        |        |        |                        |             |

Table S1-13 X ray diffraction data of core 1 sample no.13

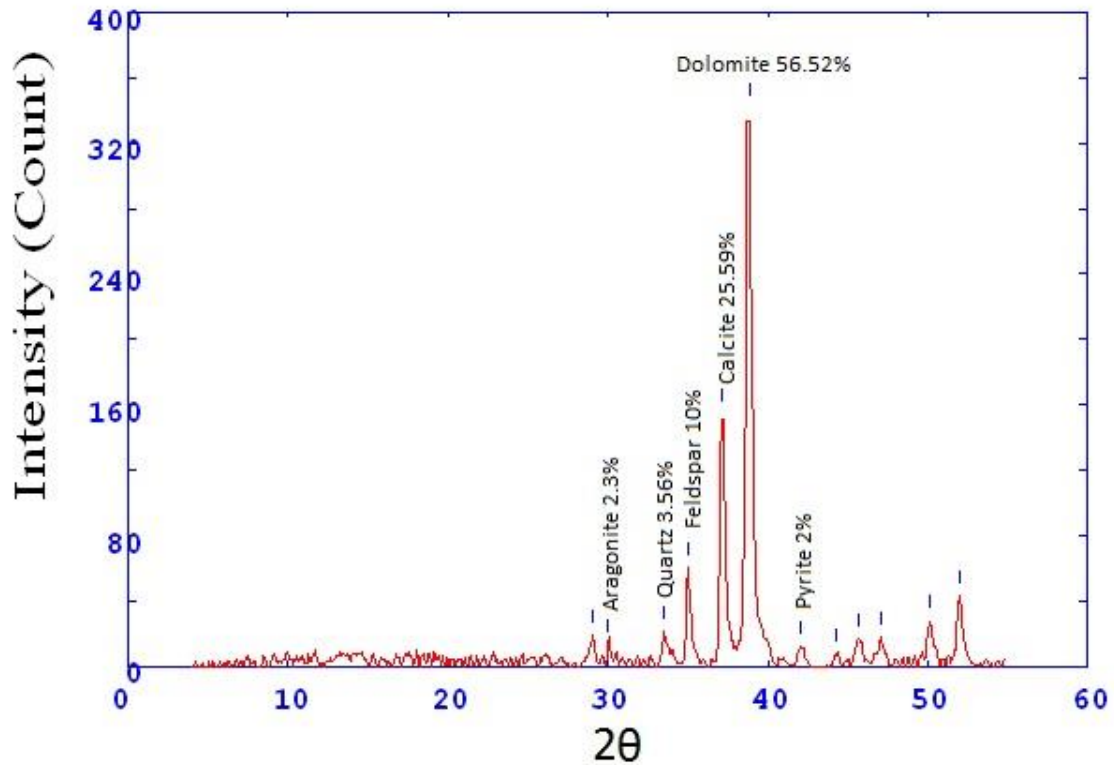

Fig.S4-13 X ray diffractogram of core 1 sample no.13

| 2Theta | d (A)          | Height | Area   | FWHM   | Identified mineral     | WT%         |
|--------|----------------|--------|--------|--------|------------------------|-------------|
| 26.237 | 4.26512        | 11.8   | 78.4   | 0.4812 | -                      | -           |
| 29.117 | 3.85107        | 20.1   | 95     | 0.4278 | -                      | -           |
| 30.154 | <b>3.72144</b> | 19     | 89.9   | 0.3427 | Aragonite              | 2.887537994 |
| 33.592 | <b>3.34998</b> | 53.2   | 150.4  | 0.2576 | Quartz                 | 8.085106383 |
| 35.07  | <b>3.21298</b> | 85.8   | 249.7  | 0.2744 | Feldspar (orthoclase ) | 13.03951368 |
| 37.227 | <b>3.03281</b> | 125.7  | 508.3  | 0.3504 | Calcite                | 19.10334347 |
| 38.759 | <b>2.91728</b> | 332.8  | 1345.4 | 0.4317 | dolomite               | 50.5775076  |
| 40.027 | <b>2.82847</b> | 29.6   | 218.4  | 0.5131 | Halite                 | 4.498480243 |
| 42.201 | <b>2.68892</b> | 11.9   | 88.7   | 0.5155 | Pyrite                 | 1.808510638 |
| 45.652 | 2.49533        | 20.5   | 87.4   | 0.4439 | -                      | -           |
| 47.168 | 2.41947        | 21.6   | 145.3  | 0.5547 | -                      | -           |
| 50.167 | 2.28341        | 24.5   | 172.4  | 0.5065 | -                      | -           |
| 52.025 | 2.20725        | 52.7   | 219.8  | 0.3621 | -                      | -           |
| Total  | 658            |        |        |        |                        |             |

Table S1-14 X ray diffraction data of core 1 sample no.14

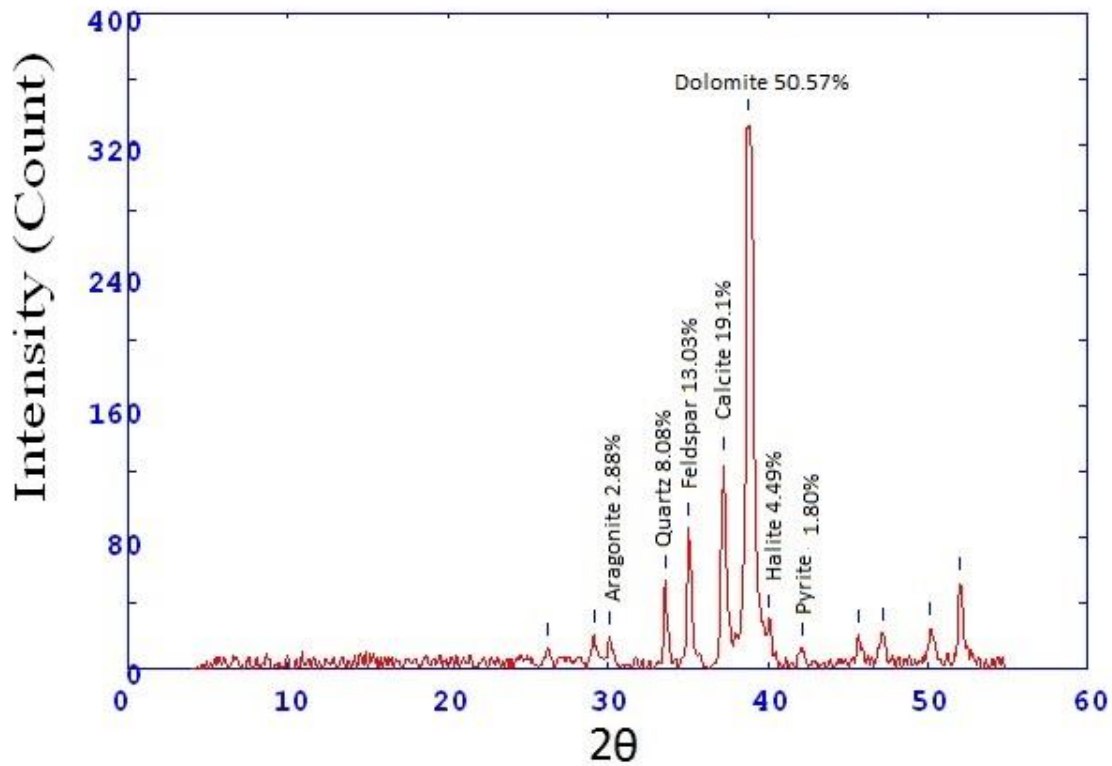

Fig.S4-14 X ray diffractogram of core 1 sample no.14



| 2Theta | d (A)   | Height | Area  | FWHM   | Identified mineral     | WT%         |
|--------|---------|--------|-------|--------|------------------------|-------------|
| 24.68  | 4.52958 | 22.1   | 20.9  | 0.1821 | -                      |             |
| 26.422 | 4.23575 | 57.1   | 160.9 | 0.2629 | Goethite               | 9.911473702 |
| 29.333 | 3.82326 | 15.7   | 44.1  | 0.2602 | -                      |             |
| 30.548 | 3.67455 | 25.3   | 70.6  | 0.2574 | -                      |             |
| 32.097 | 3.50156 | 13.8   | 38.7  | 0.2614 | -                      |             |
| 33.146 | 3.39375 | 22.3   | 62.2  | 0.2634 | Aragonite              | 3.870855754 |
| 33.782 | 3.33166 | 190.7  | 564.2 | 0.2654 | Quartz                 | 33.10189203 |
| 34.576 | 3.25743 | 19.9   | 58.7  | 0.2672 | Feldspar (orthoclase ) | 3.454261413 |
| 35.434 | 3.18101 | 76.1   | 238.1 | 0.269  | Feldspar ( Albite )    | 13.20951224 |
| 37.425 | 3.01733 | 126.8  | 498.7 | 0.334  | Calcite                | 22.0100677  |
| 39.234 | 2.88335 | 56.6   | 358.6 | 0.4627 | Dolomite               | 9.824683215 |
| 40.2   | 2.81681 | 10.2   | 64.9  | 0.4647 | Halite                 | 1.77052595  |
| 42.167 | 2.691   | 16.4   | 84    | 0.4667 | Pyrite                 | 2.846727999 |
| 45.824 | 2.48646 | 24.7   | 101.7 | 0.3456 | -                      |             |
| 46.573 | 2.44863 | 33.9   | 134.5 | 0.3314 | -                      |             |
| 48.26  | 2.3679  | 10     | 26.3  | 0.244  | -                      |             |
| 50.434 | 2.2721  | 30.8   | 130.5 | 0.3732 | -                      |             |
| 52.635 | 2.18346 | 13.1   | 105.2 | 0.5804 | -                      |             |
| 54.212 | 2.12453 | 13.2   | 106.7 | 0.468  | -                      |             |
| 55.333 | 2.08478 | 21     | 82.7  | 0.3556 | -                      |             |
| Total  | 576.1   |        |       |        |                        |             |

Table S2-1 X ray diffraction data of core 2 sample no.1

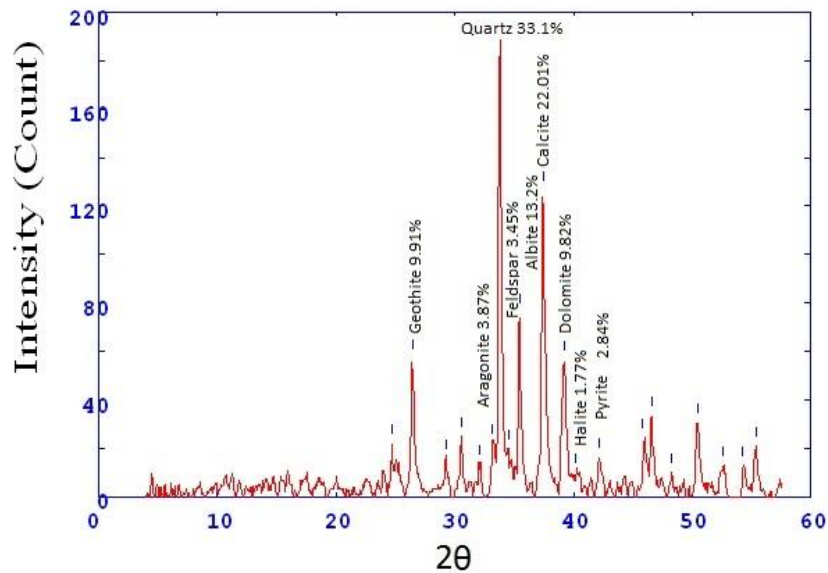

Fig.S5-1 X ray diffractogram of core 2 sample no.1

| 2Theta | d (A)           | Height | Area  | FWHM   | Identified mineral     | WT%         |
|--------|-----------------|--------|-------|--------|------------------------|-------------|
| 5.947  | <b>18.65992</b> | 228.2  | 179   | 0.1295 | Mont.                  | 38.16053512 |
| 29.701 | 3.77699         | 20.5   | 100   | 0.4178 | -                      |             |
| 33.605 | <b>3.34866</b>  | 30.4   | 147.9 | 0.3617 | Quartz                 | 5.08361204  |
| 34.224 | <b>3.28991</b>  | 88     | 326   | 0.3055 | Feldspar (orthoclase ) | 14.71571906 |
| 35.02  | <b>3.21734</b>  | 19.1   | 70.8  | 0.3124 | Albite                 | 3.193979933 |
| 37.863 | <b>2.98371</b>  | 196.8  | 758.3 | 0.3193 | Calcite                | 32.909699   |
| 39.619 | <b>2.8564</b>   | 20.5   | 79    | 0.3379 | Dolomite               | 3.428093645 |
| 40.769 | 2.77913         | 9.9    | 38.3  | 0.3472 | -                      | -           |
| 42.6   | <b>2.66488</b>  | 15     | 70    | 0.3565 | Pyrite                 | 2.508361204 |
| 46.392 | 2.45768         | 34.1   | 173.3 | 0.44   | -                      | -           |
| 47.844 | 2.38727         | 11.3   | 57.7  | 0.3613 | -                      | -           |
| 48.673 | 2.34901         | 14     | 42.7  | 0.2825 | -                      | -           |
| 50.811 | 2.25634         | 34.1   | 168   | 0.4058 | -                      | -           |
| Total  | 598             |        |       |        |                        |             |

Table S2-2 X ray diffraction data of core 2 sample no.2

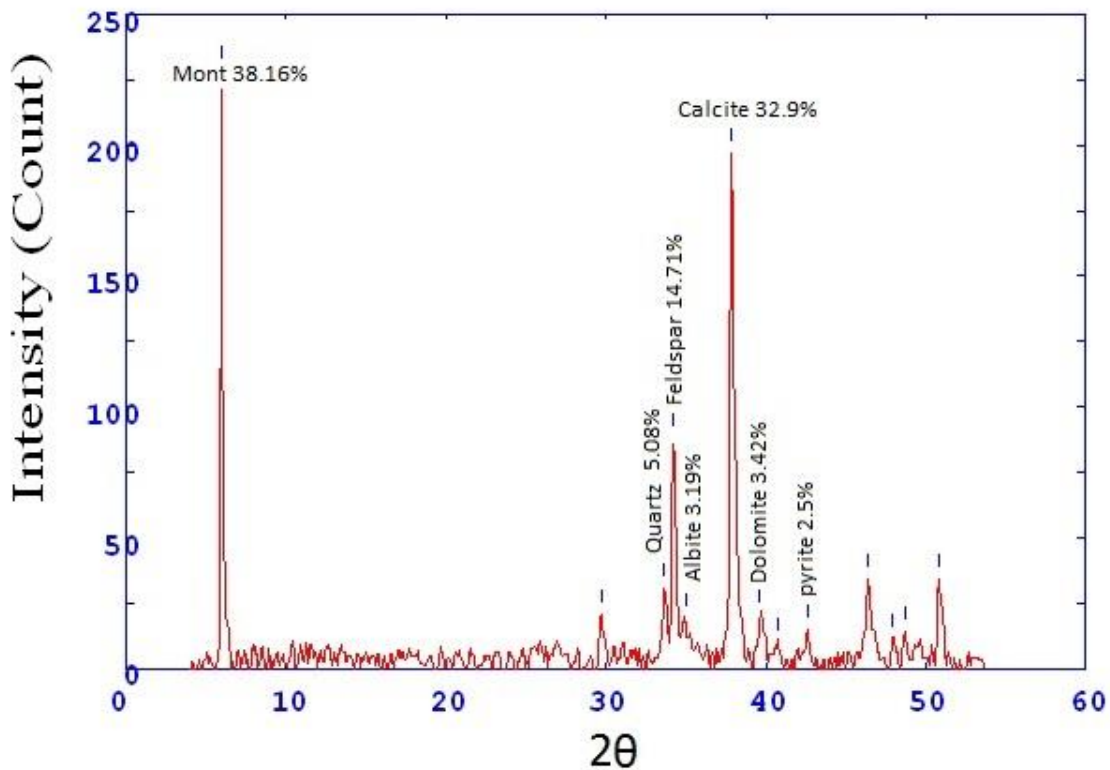

Fig.S5-2 X ray diffractogram of core 2 sample no.2

| 2Theta | d (Å)          | Height | Area  | FWHM   | Identified mineral    | WT%         |
|--------|----------------|--------|-------|--------|-----------------------|-------------|
| 26.26  | 4.26137        | 36.7   | 102.7 | 0.2462 | -                     | 0           |
| 29.156 | 3.84603        | 19.6   | 62    | 0.317  | -                     |             |
| 33.048 | <b>3.4035</b>  | 34     | 107.6 | 0.2939 | Aragonite             | 9.366391185 |
| 33.643 | <b>3.34505</b> | 96     | 290.4 | 0.2708 | Quartz                | 26.44628099 |
| 34.531 | <b>3.26148</b> | 33     | 99.8  | 0.3013 | Feldspar (Orthoclase) | 9.090909091 |
| 37.263 | <b>3.03002</b> | 159.3  | 610.4 | 0.3318 | Calcite               | 43.88429752 |
| 38.783 | <b>2.9155</b>  | 11.7   | 44.8  | 0.3253 | Dolomite              | 3.223140496 |
| 40.069 | <b>2.82563</b> | 11.7   | 44.8  | 0.3221 | Halite                | 3.223140496 |
| 41.954 | <b>2.70401</b> | 17.3   | 53.7  | 0.3189 | Pyrite                | 4.76584022  |
| 45.75  | 2.49027        | 28.5   | 183.4 | 0.4474 | -                     |             |
| 48.052 | 2.37752        | 16.3   | 96.4  | 0.473  | -                     |             |
| 48.969 | 2.33571        | 14.7   | 86.9  | 0.4218 | -                     |             |
| 50.234 | 2.28056        | 29.1   | 125.5 | 0.3706 | -                     |             |
| 55.217 | 2.08884        | 24.6   | 121.7 | 0.3801 | -                     |             |
| 58.578 | 1.97873        | 24.7   | 129.5 | 0.3952 | -                     |             |
| Total  | 363            |        |       |        |                       |             |

Table S2-3 X ray diffraction data of core 2 sample no.3

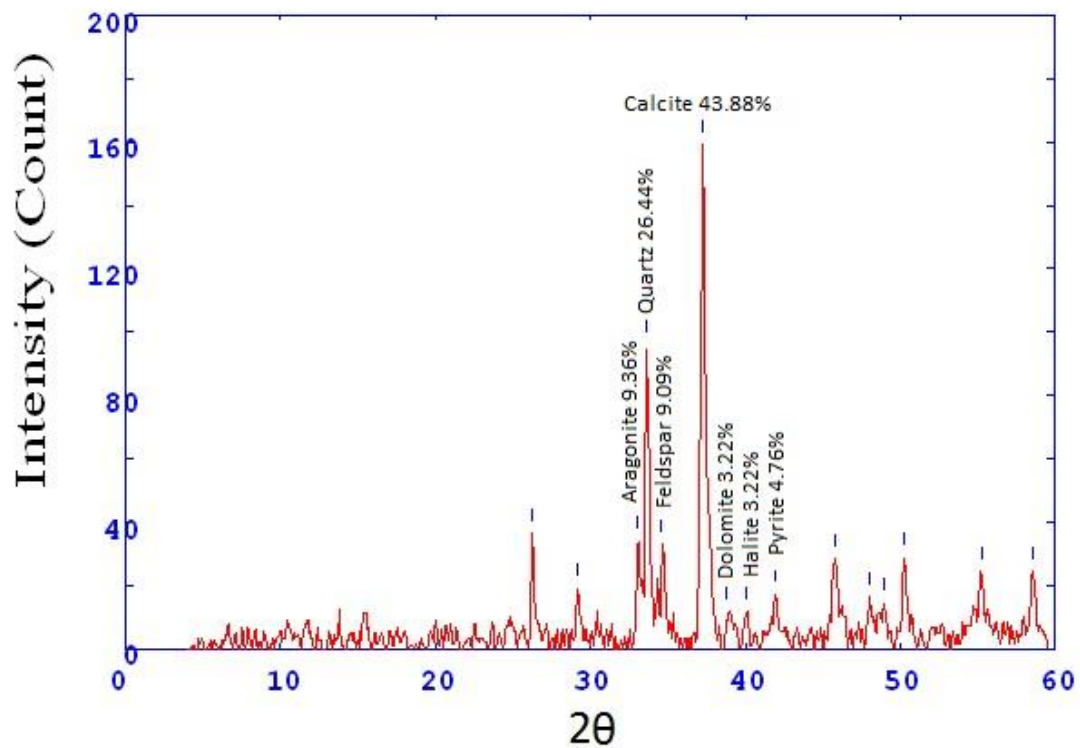

Fig.S5-3 X ray diffractogram of core 2 sample no.3

| 2Theta | d (A)          | Height | Area  | FWHM   | Identified mineral    | WT%         |
|--------|----------------|--------|-------|--------|-----------------------|-------------|
| 32.758 | <b>3.43282</b> | 64.4   | 214.7 | 0.2766 | Aragonite             | 18.14084507 |
| 33.525 | <b>3.35641</b> | 72.1   | 214.7 | 0.2766 | Quartz                | 20.30985915 |
| 34.202 | <b>3.29199</b> | 37.4   | 111.2 | 0.4672 | Feldspar (orthoclase) | 10.53521127 |
| 35.104 | <b>3.20995</b> | 6.9    | 20.6  | 0.5625 | Feldspar (Albite )    | 1.943661972 |
| 37.194 | <b>3.03538</b> | 90.3   | 833.3 | 0.6578 | Calcite               | 25.43661972 |
| 38.803 | <b>2.91412</b> | 15.3   | 140.7 | 0.458  | Dolomite              | 4.309859155 |
| 40.019 | <b>2.829</b>   | 21.5   | 68.2  | 0.2583 | Halite                | 6.056338028 |
| 41.825 | <b>2.71197</b> | 47.1   | 148.9 | 0.2876 | Pyrite                | 13.26760563 |
| 45.678 | 2.494          | 34.8   | 176.7 | 0.3911 | -                     |             |
| 47.013 | 2.42703        | 11.8   | 59.9  | 0.3525 | -                     |             |
| 47.967 | 2.38153        | 26.6   | 105.7 | 0.3139 | -                     |             |
| 48.727 | 2.34659        | 22.2   | 88.1  | 0.5884 | -                     |             |
| 50.7   | 2.26094        | 14.3   | 183.7 | 0.8628 | -                     |             |
| 52.5   | 2.18866        | 7.1    | 69.6  | 0.6444 | -                     |             |
| 54.05  | 2.13044        | 6.1    | 23.1  | 0.1167 | -                     |             |
| Total  | 355            |        |       |        |                       |             |

Table S2-4 X ray diffraction data of core 2 sample no.4

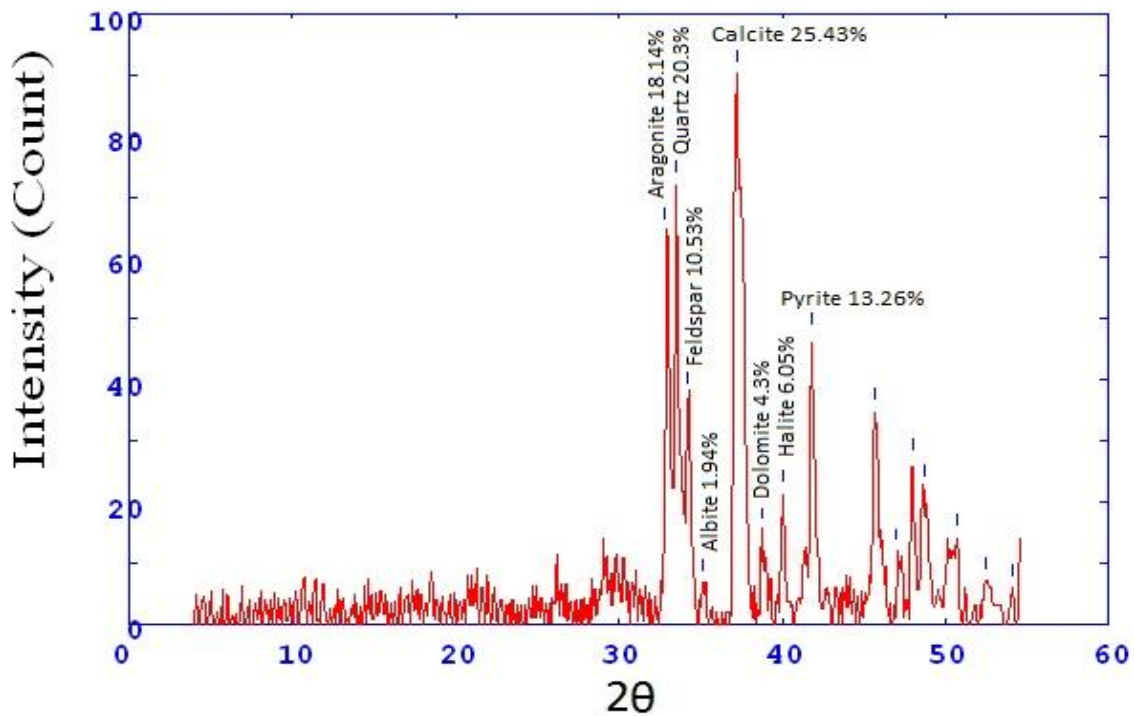

Fig.S5-4 X ray diffractogram of core 2 sample no.4

| 2Theta | d (A)          | Height | Area  | FWHM   | Identified mineral | WT%         |
|--------|----------------|--------|-------|--------|--------------------|-------------|
| 32.945 | <b>3.41386</b> | 70.7   | 212.3 | 0.3078 | Aragonite          | 29.60636516 |
| 34.155 | <b>3.29636</b> | 36     | 108   | 0.4836 | Quartz             | 15.07537688 |
| 37.24  | <b>3.03179</b> | 89.7   | 762.8 | 0.6595 | Calcite            | 37.56281407 |
| 41.806 | <b>2.71316</b> | 42.4   | 130.2 | 0.2969 | Pyrite             | 17.75544389 |
| 45.687 | 2.49353        | 39.6   | 161.1 | 0.3731 | -                  | -           |
| 47.283 | 2.41394        | 10.2   | 41.6  | 0.3524 | -                  | -           |
| 47.989 | 2.38048        | 29.5   | 121.1 | 0.3316 | -                  | -           |
| 48.924 | 2.33771        | 24.4   | 100   | 0.6495 | -                  | -           |
| 50.5   | 2.26933        | 18.2   | 236.4 | 0.9674 | -                  | -           |
| 52.115 | 2.20369        | 9.6    | 236.4 | 0.9674 | -                  | -           |
| Total  | 238.8          |        |       |        |                    |             |

Table S2-5 X ray diffraction data of core 2 sample no.5

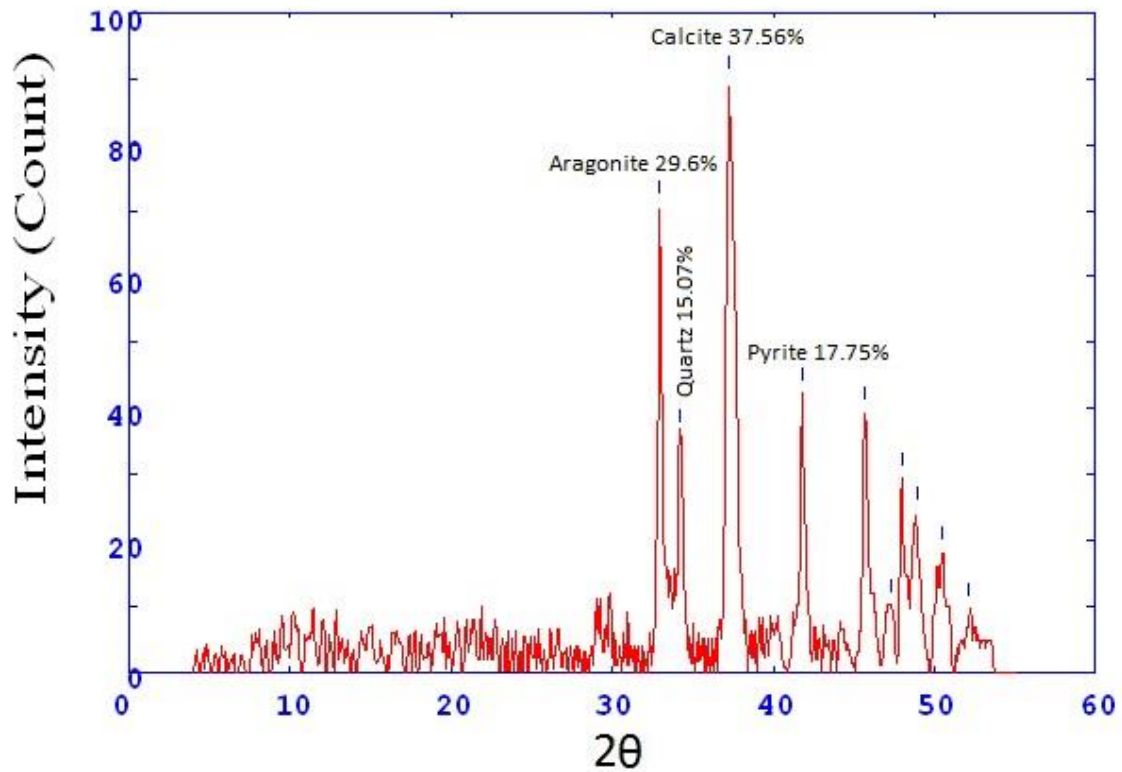

Fig.S5-5 X ray diffractogram of core 2 sample no.5

| 2Theta | d (Å)          | Height | Area  | FWHM   | Identified mineral | WT%         |
|--------|----------------|--------|-------|--------|--------------------|-------------|
| 33.091 | <b>3.39922</b> | 83     | 337.1 | 0.3292 | Aragonite          | 25.76039727 |
| 34.32  | <b>3.28098</b> | 53.7   | 218.4 | 0.4602 | Quartz             | 16.66666667 |
| 37.385 | <b>3.02047</b> | 118.2  | 881.1 | 0.5912 | Calcite            | 36.68528864 |
| 40.148 | <b>2.8203</b>  | 18.1   | 134.5 | 0.4844 | Dolomite           | 5.617628802 |
| 41.967 | <b>2.70322</b> | 49.2   | 188.8 | 0.3775 | Pyrite             | 15.27001862 |
| 45.85  | 2.48512        | 49.3   | 247.7 | 0.4326 | -                  | -           |
| 47.347 | 2.41084        | 18.1   | 86.9  | 0.9047 | -                  | -           |
| 47.947 | 2.38242        | 36.1   | 12.3  | 0.1731 | -                  | -           |
| 48.976 | 2.33538        | 27.4   | 19.8  | 0.2418 | -                  | -           |
| 50.347 | 2.27575        | 18.8   | 143.6 | 0.9735 | -                  | -           |
| Total  |                | 322.2  |       |        |                    |             |

Table S2-6 X ray diffraction data of core 2 sample no.6

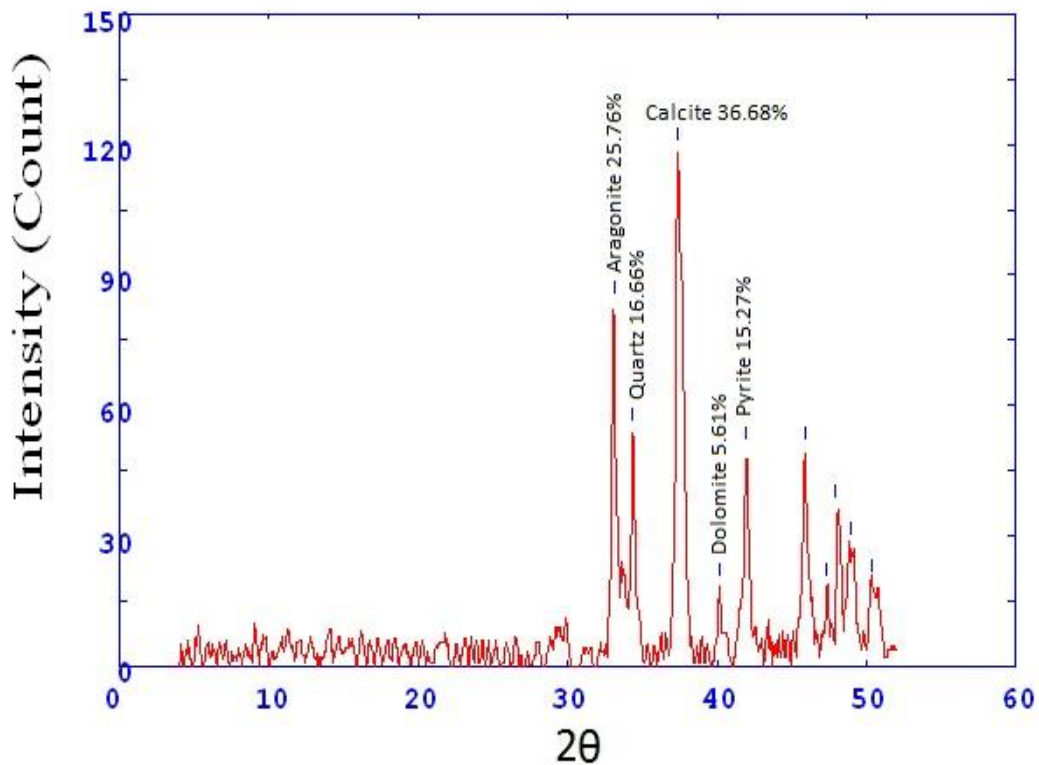

Fig.S5-6 X ray diffractogram of core 2 sample no.6

| 2Theta | d (A)          | Height | Area   | FWHM   | Identified mineral | WT%         |
|--------|----------------|--------|--------|--------|--------------------|-------------|
| 22.341 | <b>4.9968</b>  | 12.4   | 258.9  | 0.2482 | Gypsum             | 2.094948    |
| 23.509 | 4.75172        | 14.5   | 258.9  | 0.2482 | -                  |             |
| 24.829 | 4.50278        | 94.1   | 258.9  | 0.2482 | -                  |             |
| 28.783 | 3.89478        | 64.6   | 181    | 0.271  | -                  |             |
| 32.033 | 3.50837        | 330.8  | 1764.2 | 0.374  | -                  |             |
| 33.023 | <b>3.40606</b> | 37.1   | 198    | 0.3264 | Aragonite          | 6.267951    |
| 33.66  | <b>3.34336</b> | 77.9   | 231.4  | 0.2789 | Quartz             | 28.34788937 |
| 35.6   | <b>3.16659</b> | 39.7   | 118.8  | 0.3052 | feldspar           | 6.707214    |
| 37.467 | <b>3.01407</b> | 61     | 358    | 0.4212 | calcite            | 22.19796215 |
| 38.531 | <b>2.93391</b> | 33     | 193.7  | 0.4404 | dolomite           | 12.00873362 |
| 42.3   | <b>2.68291</b> | 13.7   | 99.5   | 0.4596 | pyrite             | 2.31458     |
| 44.767 | 2.54206        | 36     | 148.3  | 0.3118 | -                  |             |
| 48.583 | 2.35309        | 30.2   | 170.8  | 0.4067 | -                  |             |
| Total  |                | 274.8  |        |        |                    |             |

Table S3-1 X ray diffraction data of core 3 sample no.1

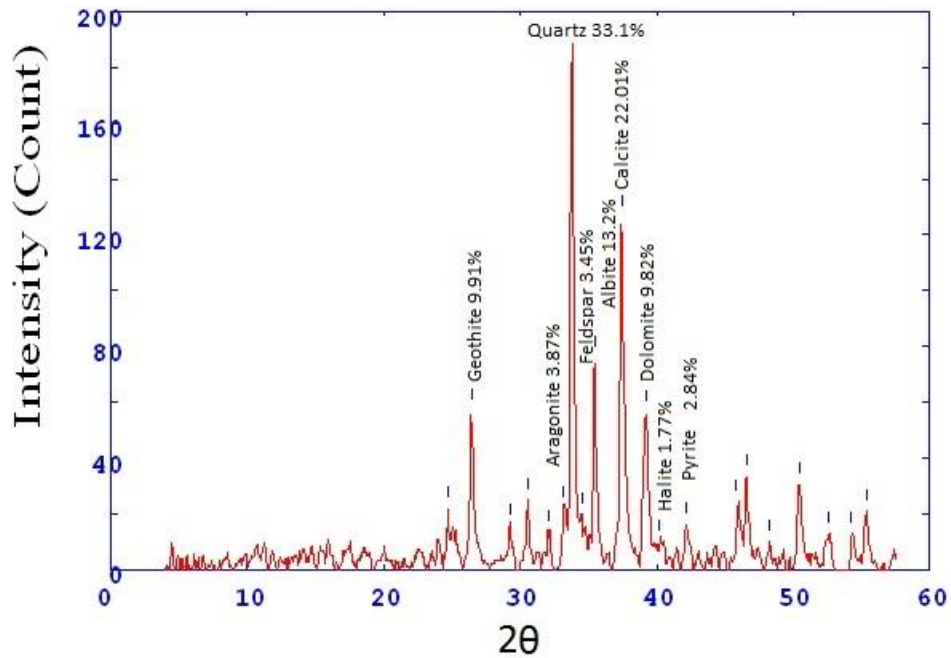

Fig.S6-1 X ray diffractogram of core 3 sample no.1

| 2Theta | d (Å)          | Height | Area    | FWHM   | Identified mineral | WT%         |
|--------|----------------|--------|---------|--------|--------------------|-------------|
| 25.081 | 4.45827        | 90.2   | 16182.7 | 0      | -                  | 0           |
| 33.583 | <b>3.3508</b>  | 124.5  | 12597.3 | 5      | Quartz             | 18.34659593 |
| 34.578 | <b>3.25722</b> | 87.4   | 8843.6  | 3.0111 | feldspar           | 12.87945771 |
| 35.216 | <b>3.20007</b> | 128.8  | 9830.7  | 1.0222 | feldspar ( Albite) | 18.98025346 |
| 37.171 | <b>3.03721</b> | 136.4  | 2165.3  | 1.099  | calcite            | 20.10020631 |
| 39.05  | <b>2.89637</b> | 113.5  | 17280   | 1.099  | Dolomite           | 16.72561155 |
| 40.033 | <b>2.82807</b> | 88     | 13402.9 | 1.099  | Halite             | 12.96787504 |
| 45.633 | 2.49629        | 79.4   | 15474.7 | 1.099  | -                  |             |
| 47.193 | 2.4183         | 74.1   | 14450.9 | 1.099  | -                  |             |
| 50.133 | 2.28483        | 79     | 10121.3 | 1.099  | -                  |             |
| Total  |                | 678.6  |         |        |                    |             |

Table S3-2 X ray diffraction data of core 3 sample no.2

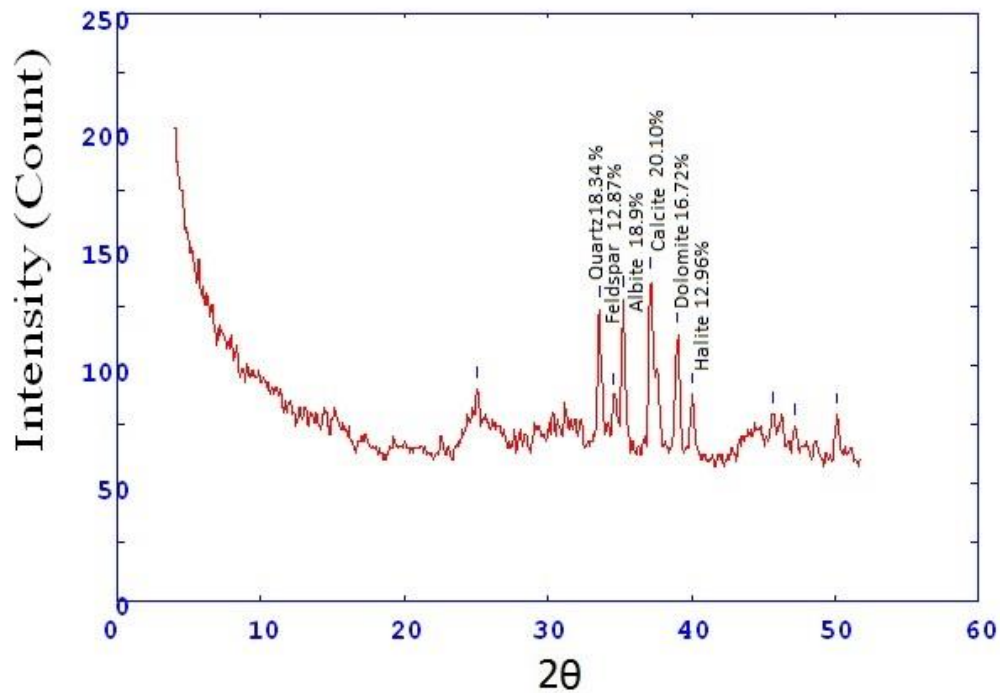

Fig.S6-2 X ray diffractogram of core 3 sample no.2



| 2Theta | d (A)          | Height | Area  | FWHM   | Identified mineral | WT%      |
|--------|----------------|--------|-------|--------|--------------------|----------|
| 26.237 | 4.2651         | 65     | 141.3 | 0.2437 | -                  |          |
| 30.395 | 3.69263        | 29.9   | 108.1 | 0.3231 | -                  | 0        |
| 33.176 | <b>3.39079</b> | 45.9   | 165.9 | 0.2885 | Aragonite          | 7.9302   |
| 33.613 | <b>3.34793</b> | 274.1  | 777.9 | 0.2538 | Quartz             | 47.3566  |
| 34.653 | <b>3.2504</b>  | 44.2   | 125.5 | 0.3469 | Feldspar           | 7.636489 |
| 35.348 | <b>3.18846</b> | 26     | 73.9  | 0.3934 | Albite             | 4.492053 |
| 37.224 | <b>3.03308</b> | 102.1  | 512.8 | 0.44   | Calcite            | 17.63994 |
| 39.054 | <b>2.89611</b> | 64.6   | 339.7 | 0.4255 | Dolomite           | 11.16102 |
| 41.917 | <b>2.7063</b>  | 21.9   | 73.7  | 0.3108 | Pyrite             | 3.78369  |
| 45.767 | 2.48941        | 26.5   | 179.3 | 0.4574 | -                  |          |
| 46.471 | 2.45374        | 20.8   | 141   | 0.3504 | -                  |          |
| 48.133 | 2.37377        | 19     | 42.3  | 0.2433 | -                  |          |
| 48.904 | 2.33862        | 12.2   | 27.2  | 0.3083 | -                  |          |
| 50.215 | 2.28135        | 25.3   | 98.7  | 0.3733 | -                  |          |
| 52.367 | 2.19384        | 16.3   | 71    | 0.3667 | -                  |          |
| Total  |                | 578.8  |       |        |                    |          |

Table S3-3 X ray diffraction data of core 3 sample no.3

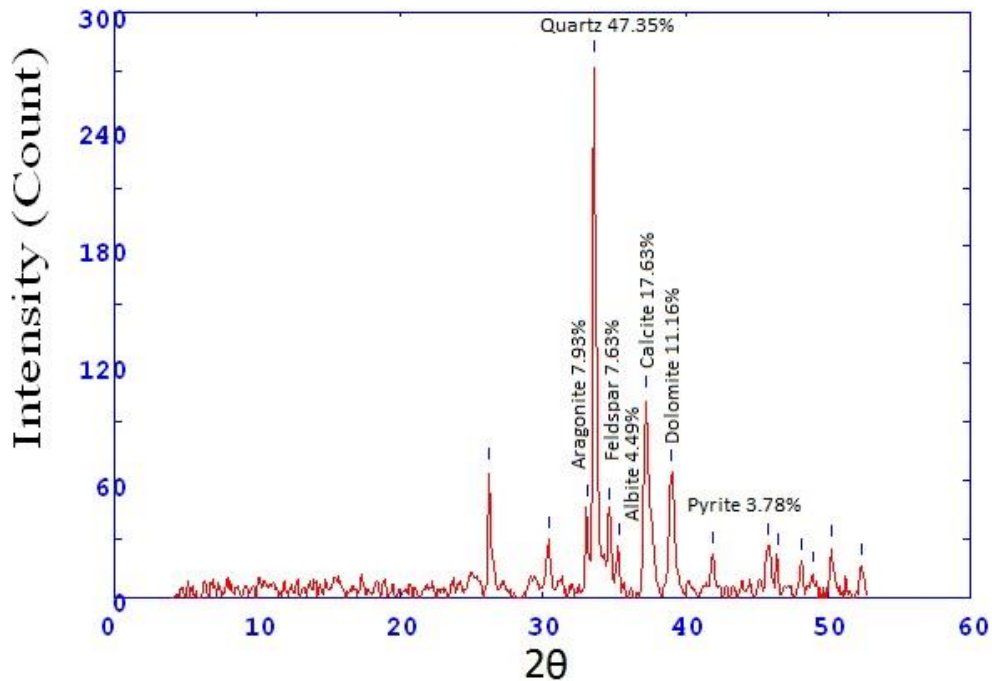

Fig.S6-3 X ray diffractogram of core 3 sample no.3

| 2Theta | d (A)          | Height | Area  | FWHM   | Identified mineral    | WT%      |
|--------|----------------|--------|-------|--------|-----------------------|----------|
| 26.276 | 4.25876        | 45.2   | 143.5 | 0.3076 | -                     | 0        |
| 29.196 | 3.84075        | 15.3   | 48.5  | 0.2681 | -                     |          |
| 30.421 | 3.68953        | 27     | 60.8  | 0.2286 | -                     |          |
| 32.966 | <b>3.41179</b> | 34.5   | 77.6  | 0.2435 | Aragonite             | 5.772126 |
| 33.631 | <b>3.3462</b>  | 265.4  | 565.4 | 0.2583 | Quartz                | 44.40355 |
| 34.671 | <b>3.24878</b> | 40.9   | 87.1  | 0.3559 | Feldspar (orthoclase) | 6.842898 |
| 35.299 | <b>3.19275</b> | 44.1   | 93.9  | 0.4047 | Feldspar (Albite)     | 7.378283 |
| 37.264 | <b>3.02987</b> | 153    | 933.6 | 0.4535 | calcite               | 25.59813 |
| 38.978 | <b>2.90148</b> | 33.7   | 205.4 | 0.3847 | dolomite              | 5.63828  |
| 41.984 | <b>2.7022</b>  | 26.1   | 114.5 | 0.3159 | pyrite                | 4.366739 |
| 45.75  | 2.49027        | 32.5   | 212.1 | 0.4647 | -                     |          |
| 48.022 | 2.37893        | 18.2   | 65.7  | 0.3456 | -                     |          |
| 50.202 | 2.28189        | 35.6   | 182.6 | 0.4741 | -                     |          |
| 52.621 | 2.18399        | 14     | 85.6  | 0.4748 | -                     |          |
| 54.073 | 2.1296         | 16.9   | 115.4 | 0.4089 | -                     |          |
| Total  |                | 597.7  |       |        |                       |          |

Table S3-4 X ray diffraction data of core 3 sample no.4

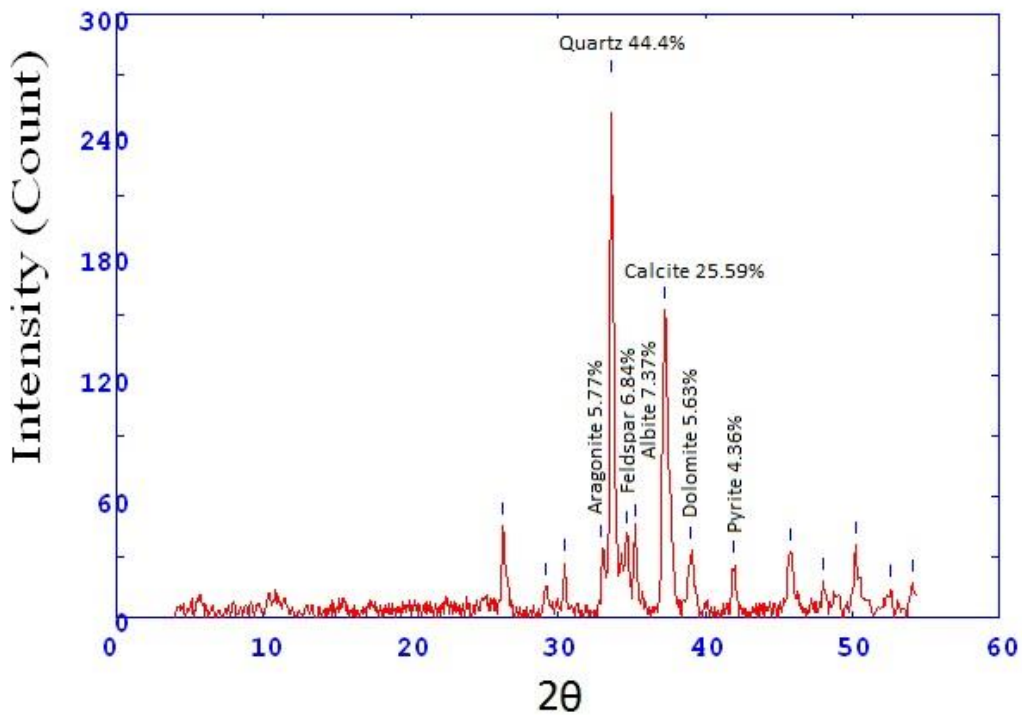

Fig.S6-4 X ray diffractogram of core 3 sample no.4

| 2Theta | d (A)          | Height | Area    | FWHM   | Identified mineral    | WT%      |
|--------|----------------|--------|---------|--------|-----------------------|----------|
| 29.34  | 3.82237        | 62     | 12618.7 | 0      | -                     | 0        |
| 33.077 | <b>3.40061</b> | 135.4  | 1153.3  | 0.5883 | Aragonite             | 28.57143 |
| 34.271 | <b>3.2855</b>  | 93.9   | 799.3   | 0.7727 | Feldspar (orthoclase) | 19.81431 |
| 37.638 | <b>3.00084</b> | 147.2  | 2238.7  | 0.9571 | calcite               | 31.06141 |
| 41.962 | <b>2.70351</b> | 97.4   | 2053.3  | 1.6    | Pyrite                | 20.55286 |
| 45.833 | 2.48598        | 88.5   | 7870.7  | 2.4    | -                     |          |
| 47.2   | 2.41793        | 55.7   | 4952.3  | 2.4    | -                     |          |
| 48.133 | 2.37377        | 77     | 12202.7 | 2.4    | -                     |          |
| 48.993 | 2.3346         | 74.1   | 11749.6 | 2.4    | -                     |          |
| 50.315 | 2.27713        | 64.9   | 10287.2 | 2.4    | -                     |          |
| 52.433 | 2.19125        | 55.1   | 11308   | 2.4    | -                     |          |
| 54.681 | 2.1077         | 68.2   | 8512    | 2.4    | -                     |          |
| Total  |                | 473.9  |         |        |                       |          |

Table S3-5 X ray diffraction data of core 3 sample no.5

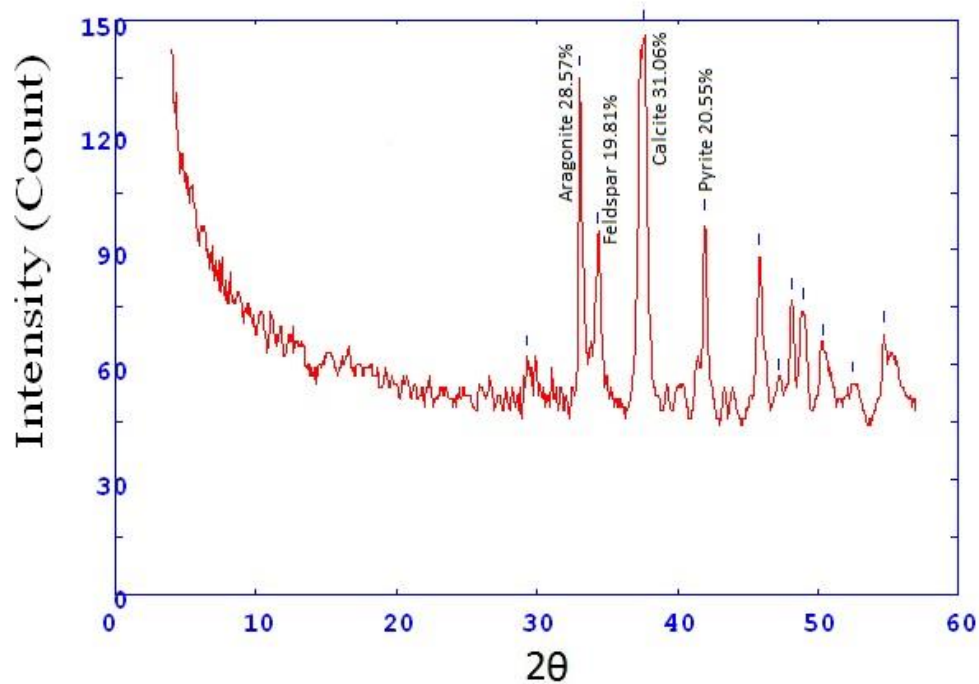

Fig.S6-5 X ray diffractogram of core 3 sample no.5

| 2Theta | d (A)          | Height | Area    | FWHM   | Identified mineral    | WT%      |
|--------|----------------|--------|---------|--------|-----------------------|----------|
| 14.55  | <b>7.64437</b> | 132    | 1633.3  | 0.9556 | Gypsum                | 12.18387 |
| 23.8   | 4.69447        | 63     | 12718.7 | 0.9556 | -                     |          |
| 26.259 | 4.26147        | 110.1  | 1826.7  | 1.3333 | -                     |          |
| 28.283 | 3.96212        | 58.1   | 963.7   | 1.3333 | -                     |          |
| 29.425 | 3.81158        | 70.3   | 1165.4  | 1.3333 | -                     |          |
| 30.395 | 3.69263        | 74     | 15790.7 | 1.3333 | -                     |          |
| 33.013 | <b>3.40701</b> | 115.7  | 24685.7 | 0.858  | Aragonite             | 10.67934 |
| 33.609 | <b>3.34829</b> | 223.7  | 1048    | 0.3827 | Quartz                | 20.64796 |
| 34.563 | <b>3.25862</b> | 143.2  | 671.2   | 0.6589 | Feldspar (orthoclase) | 13.21765 |
| 35.297 | <b>3.19295</b> | 117.6  | 551.2   | 0.7971 | Albite                | 10.85472 |
| 37.278 | <b>3.02882</b> | 154.2  | 2156    | 0.9352 | calcite               | 14.23297 |
| 39.1   | <b>2.89281</b> | 104.3  | 14274.7 | 6.8    | dolomite              | 9.6271   |
| 40.027 | <b>2.82849</b> | 92.7   | 12688.9 | 6.8    | Halite                | 8.556397 |
| 41.25  | 2.7481         | 65.1   | 8920.1  | 6.8    | -                     |          |
| 41.927 | <b>2.7057</b>  | 82     | 14721.3 | 6.8    | -                     |          |
| 45.756 | 2.48998        | 84.7   | 11344   | 6.8    | -                     |          |
| 47.285 | 2.41385        | 61.3   | 8213.8  | 6.8    | -                     |          |
| 48.019 | 2.37909        | 70.3   | 9414.5  | 6.8    | -                     |          |
| 48.748 | 2.34561        | 71.3   | 7760    | 6.8    | -                     |          |
| Total  |                | 1083.4 |         |        |                       |          |

Table S3-6 X ray diffraction data of core 3 sample no.6

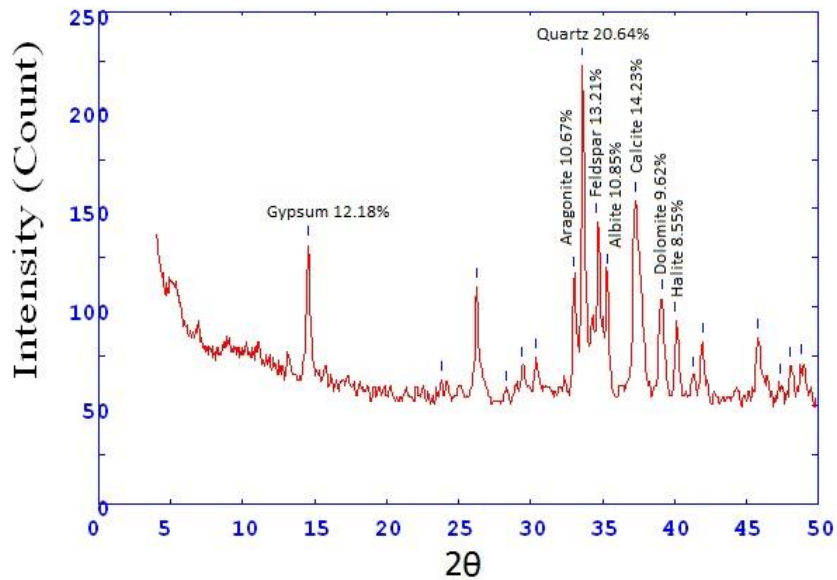

Fig.S6-6 X ray diffractogram of core 3 sample no.6

| 2Theta | d (Å)          | Height | Area    | FWHM   | Identified mineral    | WT%         |
|--------|----------------|--------|---------|--------|-----------------------|-------------|
| 13.166 | <b>8.44383</b> | 79.8   | 1217.3  | 0.6667 | Illite                | 7.123092029 |
| 14.522 | <b>7.65891</b> | 140.5  | 1217.3  | 0.6667 | Gypsum                | 12.54128358 |
| 26.186 | 4.27326        | 73.2   | 12713.3 | 0.6667 | -                     |             |
| 29.429 | 3.81109        | 72.6   | 12608.9 | 0.6667 | -                     |             |
| 30.288 | 3.70546        | 76.8   | 15068   | 0.6667 | -                     |             |
| 33.012 | <b>3.40712</b> | 111.5  | 21874.5 | 0.5117 | Aragonite             | 9.952691243 |
| 33.56  | <b>3.35302</b> | 237    | 1069.3  | 0.3567 | Quartz                | 21.15504776 |
| 34.574 | <b>3.25758</b> | 154    | 694.7   | 0.6307 | Feldspar (othoclase ) | 13.74631795 |
| 37.278 | <b>3.02882</b> | 154.1  | 2069.3  | 0.9048 | Calcite               | 13.75524413 |
| 38.984 | <b>2.90106</b> | 84.1   | 1129    | 0.9048 | dolomite              | 7.50691779  |
| 40.087 | <b>2.82442</b> | 74     | 993.6   | 0.9048 | Halite                | 6.605373561 |
| 41.9   | <b>2.70735</b> | 85.3   | 14253.3 | 0.9048 | pyrite                | 7.614031956 |
| 44.313 | 2.56673        | 58.9   | 9842.8  | 0.9048 | -                     |             |
| 45.8   | 2.48769        | 84     | 12822.7 | 0.9048 | -                     |             |
| 47.345 | 2.41094        | 61     | 9316.6  | 0.9048 | -                     |             |
| 48.1   | 2.37531        | 74.5   | 12541.3 | 0.9048 | -                     |             |
| 48.816 | 2.34258        | 66.1   | 11123.1 | 0.9048 | -                     |             |
| 50.286 | 2.27836        | 65.4   | 11001.8 | 0.9048 | -                     |             |
| 52.333 | 2.19514        | 59     | 9957.3  | 0.9048 | -                     |             |
| Total  |                | 1120.3 |         |        |                       |             |

Table S3-7 X ray diffraction data of core 3 sample no.7

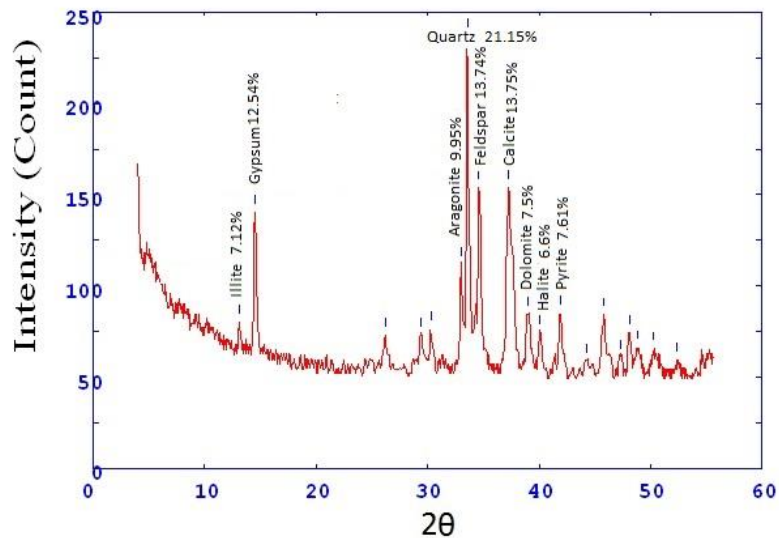

Fig.S6-7 X ray diffractogram of core 3 sample no.7

| 2Theta | d (A)          | Height | Area    | FWHM   | Identified mineral     | WT%      |
|--------|----------------|--------|---------|--------|------------------------|----------|
| 26.447 | 4.23183        | 63.2   | 11172   | 0      | -                      |          |
| 29.952 | 3.74602        | 59.3   | 12373.3 | 0      | -                      | 0        |
| 33.179 | <b>3.39041</b> | 132.2  | 1036    | 0.563  | Aragonite              | 19.53598 |
| 33.856 | <b>3.32457</b> | 98.4   | 771     | 0.8111 | Quartz                 | 14.54116 |
| 34.45  | <b>3.26893</b> | 94.3   | 738.9   | 0.9352 | Feldspar (orthoclase ) | 13.93527 |
| 35.129 | <b>3.20768</b> | 70.1   | 549.4   | 0.9972 | Albite                 | 10.3591  |
| 37.518 | <b>3.01011</b> | 126.3  | 2124    | 1.0593 | calcite                | 18.66411 |
| 40.2   | <b>2.8168</b>  | 62     | 12397.3 | 1.0593 | Halite                 | 9.16211  |
| 42.013 | <b>2.70037</b> | 93.4   | 2062.7  | 1.7222 | pyrite                 | 13.80228 |
| 45.919 | 2.48159        | 82.2   | 11818.7 | 1.7222 | -                      |          |
| 47.352 | 2.41065        | 57.8   | 8316.8  | 1.7222 | -                      |          |
| 48.147 | 2.37315        | 82.4   | 9737.3  | 1.7222 | -                      |          |
| 48.964 | 2.33591        | 72.2   | 0       | 0      | -                      |          |
| 50.407 | 2.27323        | 61.1   | 0       | 0      | -                      |          |
| Total  |                | 676.7  |         |        |                        |          |

Table S3-8 X ray diffraction data of core 3 sample no.8

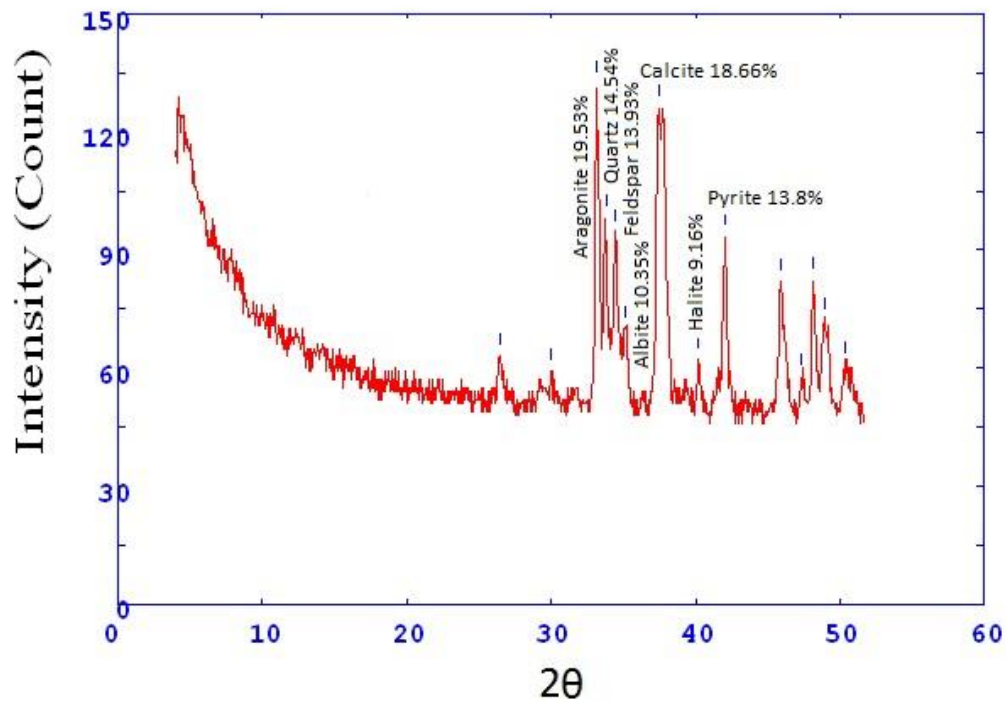

Fig.S6-8 X ray diffractogram of core 3 sample no.8

| 2Theta | d (A)          | Height | Area    | FWHM   | Identified mineral    | WT%      |
|--------|----------------|--------|---------|--------|-----------------------|----------|
| 29.776 | 3.76761        | 63.4   | 13272   | 0      | -                     | 0        |
| 32.924 | <b>3.41594</b> | 140.3  | 1076    | 0.5172 | Aragonite             | 17.68785 |
| 33.446 | <b>3.36411</b> | 81     | 621.4   | 1.5387 | Quartz                | 10.2118  |
| 34.15  | <b>3.29679</b> | 93.4   | 716.4   | 2.0495 | -                     |          |
| 34.747 | <b>3.24188</b> | 110.6  | 4132    | 2.5603 | feldspar (orthoclase) | 13.94352 |
| 37.525 | <b>3.00962</b> | 135.2  | 2118.7  | 0.9769 | calcite               | 17.04488 |
| 38.812 | <b>2.91343</b> | 84.1   | 1318.3  | 0.9769 | dolomite              | 10.60262 |
| 39.956 | <b>2.83331</b> | 56.8   | 889.9   | 0.9769 | Halite                | 7.160867 |
| 41.773 | <b>2.71519</b> | 91.8   | 13505.3 | 0.9769 | pyrite                | 11.57337 |
| 45.633 | 2.49629        | 87.9   | 12505.3 | 0.9769 | -                     |          |
| 46.993 | 2.42799        | 60.9   | 8666.3  | 0.9769 | -                     |          |
| 47.882 | 2.38549        | 82.3   | 12152   | 0.9769 | -                     |          |
| 48.752 | 2.34545        | 68.6   | 10136.1 | 0.9769 | -                     |          |
| 50.592 | 2.26548        | 62.1   | 9442.7  | 0.9769 | -                     |          |
| 52.253 | 2.19826        | 62.2   | 7386.7  | 0.9769 | -                     |          |
| Total  |                | 793.2  |         |        |                       |          |

Table S3-9 X ray diffraction data of core 3 sample no.9

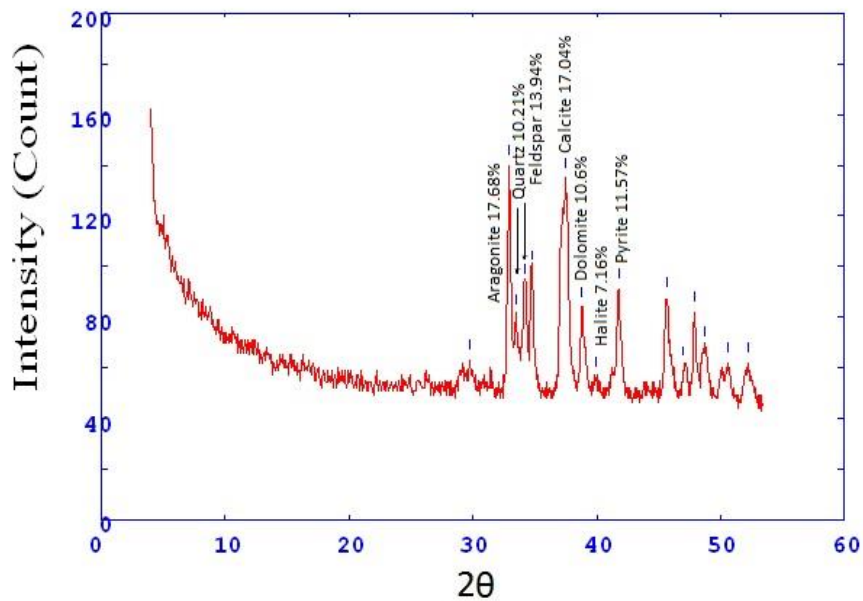

Fig.S6-9 X ray diffractogram of core 3 sample no.9

| 2Theta | d (A)          | Height | Area   | FWHM   | Identified mineral        | WT%      |
|--------|----------------|--------|--------|--------|---------------------------|----------|
| 12.995 | <b>8.55463</b> | 108.2  | 2074.4 | 0.421  | Illite                    | 11.9969  |
| 14.5   | <b>7.6705</b>  | 329.4  | 2074.4 | 0.421  | Gypsum                    | 36.5229  |
| 23.339 | 4.78594        | 11.8   | 86.1   | 0.5672 | -                         |          |
| 25.977 | 4.30701        | 53.8   | 284.7  | 0.3977 | -                         |          |
| 26.474 | <b>4.22749</b> | 24.6   | 130.1  | 0.3204 | Goethite                  |          |
| 29.273 | 3.83091        | 219.3  | 603.1  | 0.2431 | -                         | 0        |
| 31.24  | 3.59516        | 12.6   | 35.8   | 0.2209 | -                         |          |
| 32.723 | <b>3.43638</b> | 37.8   | 107.2  | 0.2347 | Aragonite                 | 4.191152 |
| 33.409 | <b>3.36782</b> | 113.4  | 315.8  | 0.2485 | Quartz                    | 12.57346 |
| 34.419 | <b>3.27179</b> | 75.6   | 210.4  | 0.518  | feldspar<br>(orthoclase ) | 8.382304 |
| 36.383 | <b>3.10069</b> | 54.2   | 150.8  | 0.6528 | Albite                    | 6.009535 |
| 36.983 | <b>3.05207</b> | 68.8   | 695.9  | 0.7875 | calcite                   | 7.62834  |
| 39.114 | <b>2.89185</b> | 34.3   | 134.3  | 0.3403 | dolomite                  | 3.803082 |
| 39.865 | <b>2.83952</b> | 27.6   | 108.1  | 0.4911 | halite                    | 3.060206 |
| 41.957 | <b>2.70385</b> | 28     | 221.2  | 0.6419 | Pyrite                    | 9.080829 |
| 44.596 | 2.5513         | 10.3   | 81.1   | 0.5279 | -                         |          |
| 45.519 | 2.50222        | 21.6   | 114    | 0.4139 | -                         |          |
| 47.078 | 2.42386        | 11.7   | 11.4   | 0.1928 | Gypsum                    |          |
| 48.534 | 2.35536        | 14.9   | 95.4   | 0.4807 | Gypsum                    |          |
| 49.875 | 2.29589        | 17.6   | 79.7   | 0.3828 | Gypsum                    |          |
| 51.464 | 2.22963        | 13.6   | 42.5   | 0.2822 | feldspar (orthoclase )    |          |
| Total  |                | 901.9  |        |        |                           |          |

Table S4-1 X ray diffraction data of core 4 sample no.1

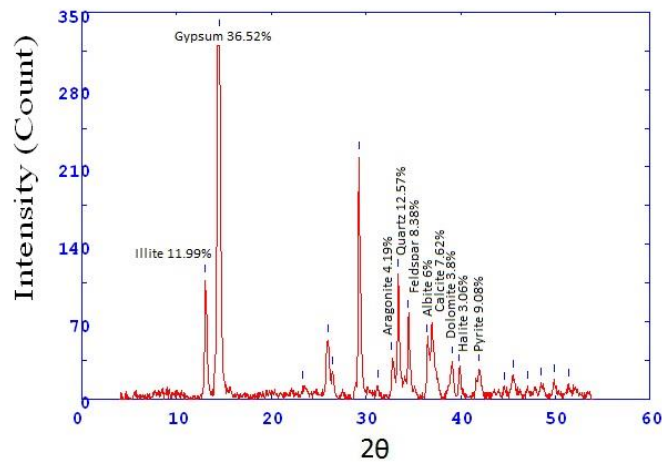

Fig.S7-1 X ray diffractogram of core 4 sample no.1



| 2Theta | d (A)   | Height | Area  | FWHM   | Identified mineral | WT%      |
|--------|---------|--------|-------|--------|--------------------|----------|
| 13.631 | 8.1568  | 8.6    | 47.9  | 0.2271 | Illite             | 1.565344 |
| 14.954 | 7.43883 | 18.4   | 47.9  | 0.2271 | Gypsum             | 3.349108 |
| 26.664 | 4.198   | 81.9   | 231.4 | 0.259  | Goethite           | 14.90717 |
| 29.492 | 3.80305 | 19.5   | 90.8  | 0.3681 | -                  |          |
| 30.795 | 3.64586 | 23.6   | 49.8  | 0.2012 | -                  | 0        |
| 33.522 | 3.35674 | 33.6   | 70.8  | 0.2302 | Aragonite          | 6.115763 |
| 34.025 | 3.30859 | 184.3  | 523.8 | 0.2591 | Quartz             | 33.54569 |
| 37.685 | 2.99726 | 158    | 621.4 | 0.3496 | calcite            | 28.75865 |
| 39.502 | 2.86453 | 25.1   | 141.7 | 0.3957 | dolomite           | 4.56862  |
| 40.572 | 2.79205 | 16.5   | 93.3  | 0.3907 | halite             | 3.003276 |
| 42.401 | 2.67683 | 23     | 122.1 | 0.3857 | Pyrite             | 4.186385 |
| 46.233 | 2.46564 | 35.8   | 193.6 | 0.4203 | Aragonite          |          |
| 46.699 | 2.44242 | 16.5   | 89.4  | 0.3725 | Gypsum             |          |
| 48.478 | 2.35791 | 16     | 64.1  | 0.3247 | Gypsum             |          |
| 49.3   | 2.32096 | 11.4   | 45.8  | 0.3437 | Gypsum             |          |
| 50.654 | 2.26287 | 36.1   | 153.2 | 0.3627 | Gypsum             |          |
| Total  |         | 549.4  |       |        |                    |          |

Table S4-2 X ray diffraction data of core 4 sample no.2

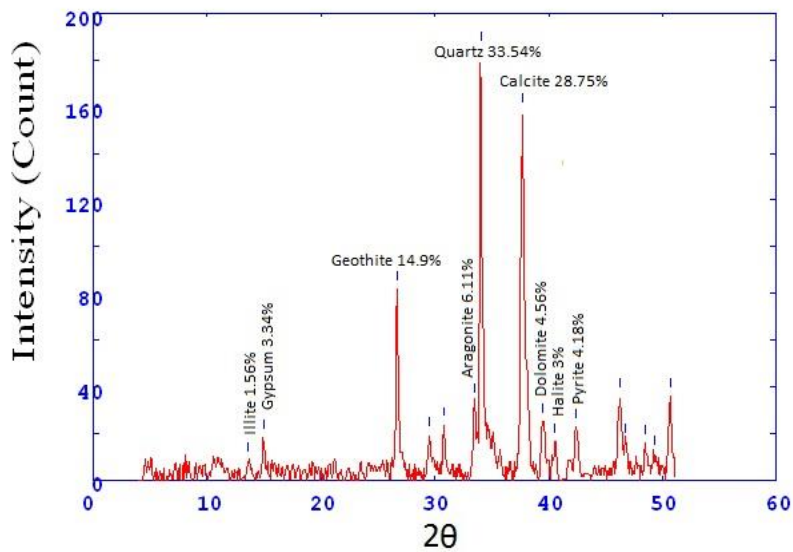

Fig.S7-2 X ray diffractogram of core 4 sample no.2

| 2Theta | d (A)          | Height | Area   | FWHM   | Identified mineral        | WT%      |
|--------|----------------|--------|--------|--------|---------------------------|----------|
| 26.082 | 4.28994        | 13.5   | 65     | 0.3724 | -                         |          |
| 29.071 | 3.85691        | 13.5   | 99.1   | 0.4811 | -                         | 0        |
| 32.807 | <b>3.42778</b> | 59.7   | 438    | 0.407  | Aragonite                 | 15.98394 |
| 33.471 | <b>3.36169</b> | 66.2   | 270.5  | 0.333  | Quartz                    | 17.72423 |
| 34.152 | <b>3.2966</b>  | 33.8   | 137.9  | 0.4481 | feldspar<br>(orthoclase ) | 9.049531 |
| 37.144 | <b>3.03938</b> | 163.5  | 1182.2 | 0.5631 | calcite                   | 43.7751  |
| 38.943 | <b>2.90403</b> | 11.5   | 82.8   | 0.4291 | dolomite                  | 3.078983 |
| 41.726 | <b>2.71812</b> | 38.8   | 119.1  | 0.2951 | Pyrite                    | 10.38822 |
| 43.811 | 2.59471        | 8.6    | 34.8   | 0.2911 | -                         |          |
| 45.541 | 2.50108        | 38.5   | 202.7  | 0.4232 | -                         |          |
| 47.095 | 2.42301        | 14.6   | 76.6   | 0.3812 | Aragonite                 |          |
| 47.811 | 2.38882        | 23.6   | 92.2   | 0.3392 | Gypsum                    |          |
| 48.608 | 2.35197        | 18.2   | 71.2   | 0.4174 | Gypsum                    |          |
| 49.938 | 2.29319        | 19.3   | 121.8  | 0.4956 | gypsum                    |          |
| Total  |                | 373.5  |        |        |                           |          |

Table S4-3 X ray diffraction data of core 4 sample no.3

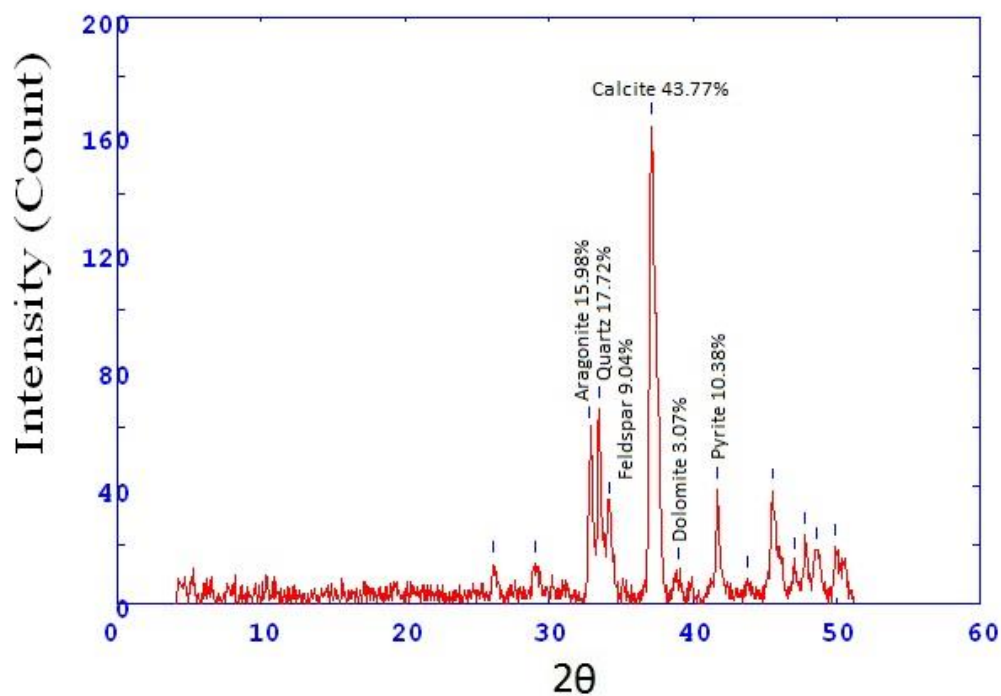

Fig.S7-3 X ray diffractogram of core 4 sample no.3

| 2Theta | d (A)          | Height | Area    | FWHM   | Identified mineral        | WT%      |
|--------|----------------|--------|---------|--------|---------------------------|----------|
| 26.125 | 4.28301        | 60.1   | 12293.3 | 0      | -                         | 0        |
| 29     | 3.8662         | 63     | 13493.3 | 0      | -                         |          |
| 32.864 | <b>3.42203</b> | 116.8  | 25010.1 | 0.3444 | Aragonite                 | 17.86752 |
| 33.469 | <b>3.36194</b> | 132    | 1182.7  | 0.6889 | Quartz                    | 20.19275 |
| 34.101 | <b>3.30143</b> | 87.2   | 781.3   | 0.8713 | feldspar<br>(orthoclase ) | 13.33945 |
| 37.427 | <b>3.0172</b>  | 121.8  | 2036    | 1.0538 | calcite                   | 18.6324  |
| 38.71  | <b>2.92083</b> | 56.3   | 940.9   | 1.0538 | dolomite                  | 8.612513 |
| 39.933 | <b>2.83483</b> | 59     | 13505.3 | 1.0538 | halite                    | 9.025547 |
| 41.758 | <b>2.71612</b> | 80.6   | 13326.7 | 1.0538 | Pyrite                    | 12.32981 |
| 45.643 | 2.4958         | 74.4   | 12706.7 | 1.0538 | Aragonite                 |          |
| 47.029 | 2.42625        | 55.9   | 9549.3  | 1.0538 | Aragonite                 |          |
| 47.942 | 2.38269        | 76.1   | 12374.7 | 1.0538 | -                         |          |
| 48.715 | 2.34712        | 68.9   | 11202.9 | 1.0538 | -                         |          |
| 49.952 | 2.29261        | 64.1   | 10429   | 1.0538 | -                         |          |
| 52.456 | 2.19038        | 59.1   | 12281.3 | 1.0538 | Aragonite                 |          |
| 54.567 | 2.11178        | 59.3   | 12214.7 | 1.0538 | -                         |          |
| 58.4   | 1.98422        | 88     | 2720    | 2.4667 | -                         |          |
| 60.744 | 1.91456        | 61.4   | 1897.3  | 2.4667 | -                         |          |
| 61.733 | 1.88682        | 77     | 11885.3 | 2.4667 | -                         |          |
| 64.26  | 1.82013        | 68     | 9206.7  | 2.4667 | -                         |          |
| Total  |                | 653.7  |         |        |                           |          |

Table S4-4 X ray diffraction data of core 4 sample no.4

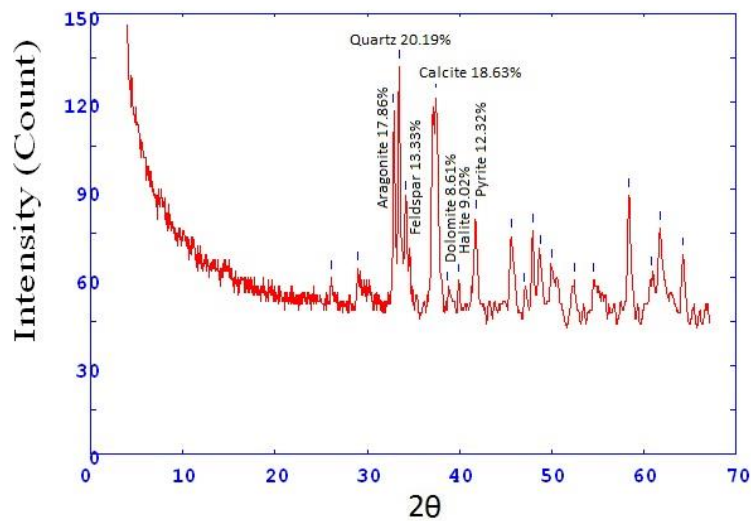

Fig.S7-4 X ray diffractogram of core 4 sample no.4

| 2Theta | d (Å)          | Height | Area   | FWHM   | Identified mineral        | WT%      |
|--------|----------------|--------|--------|--------|---------------------------|----------|
| 32.977 | <b>3.41066</b> | 62.8   | 694.7  | 0.7333 | Aragonite                 | 26.9066  |
| 34.255 | <b>3.287</b>   | 47.5   | 525.3  | 0.7742 | feldspar<br>(orthoclase ) | 20.35133 |
| 37.589 | <b>3.00465</b> | 79.1   | 1041.3 | 0.815  | calcite                   | 33.89032 |
| 41.805 | <b>2.71324</b> | 44     | 942.7  | 1.4667 | Pyrite                    | 18.85176 |
| 45.667 | 2.49456        | 38     | 6237.3 | 1.4667 | -                         |          |
| 48     | 2.37997        | 38     | 5693.3 | 1.4667 | -                         |          |
| 48.826 | 2.34211        | 31.6   | 4729.1 | 1.4667 | -                         |          |
| 50.667 | 2.26234        | 32     | 4450.7 | 1.4667 | -                         |          |
| Total  |                | 233.4  |        |        |                           |          |

Table S4-5 X ray diffraction data of core 4 sample no.5

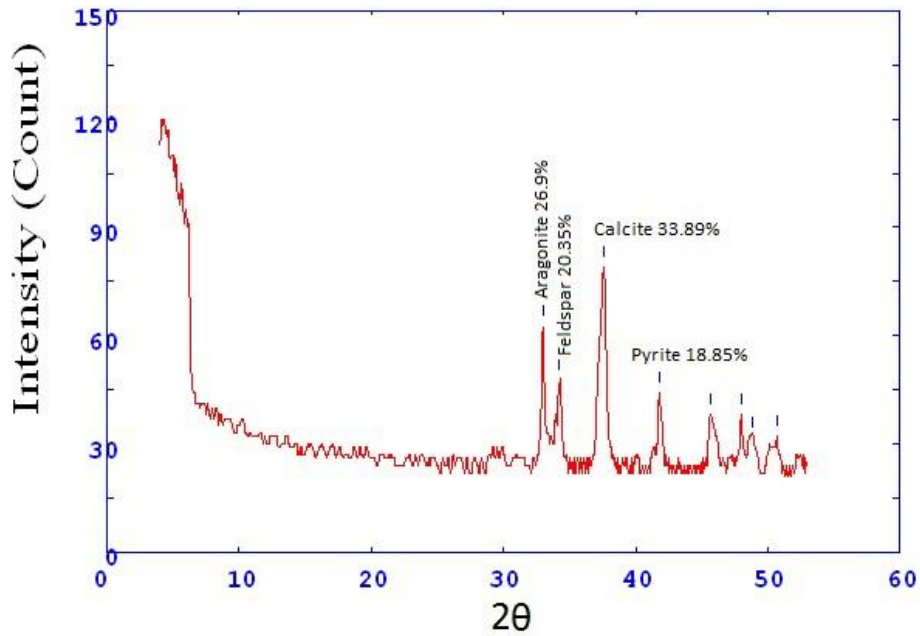

Fig.S7-5 X ray diffractogram of core 4 sample no.5

| 2Theta | d (A)          | Height | Area    | FWHM   | Identified mineral        | WT%      |
|--------|----------------|--------|---------|--------|---------------------------|----------|
| 29.167 | 3.84459        | 60.4   | 12160   | 0      | -                         |          |
| 29.826 | 3.76146        | 57.5   | 11584   | 0.9597 | -                         |          |
| 30.889 | 3.63497        | 55.6   | 11191.6 | 1.4396 | -                         | 0        |
| 33     | <b>3.40834</b> | 113    | 2808    | 1.9194 | Aragonite                 | 20.71494 |
| 33.588 | <b>3.35031</b> | 66.8   | 1659.2  | 1.4523 | Quartz                    | 12.24565 |
| 34.325 | <b>3.28055</b> | 82.8   | 2058.6  | 1.2187 | feldspar<br>(orthoclase ) | 15.17874 |
| 37.567 | <b>3.00636</b> | 134.3  | 2150.7  | 0.9852 | calcite                   | 24.61962 |
| 40.033 | <b>2.82804</b> | 63     | 12472   | 0.9852 | dolomite                  | 11.54904 |
| 41.886 | <b>2.70823</b> | 85.6   | 12698.7 | 0.9852 | Pyrite                    | 15.69203 |
| 43.976 | 2.58545        | 50.7   | 7523.2  | 0.9852 | -                         |          |
| 45.744 | 2.49055        | 77.1   | 10422.7 | 0.9852 | -                         |          |
| 48.067 | 2.37686        | 71     | 7892    | 0.9852 | -                         |          |
| 48.883 | 2.33954        | 68.7   | 0       | 0      | Aragonite                 |          |
| Total  |                | 545.5  |         |        |                           |          |

Table S4-6 X ray diffraction data of core 4 sample no.6

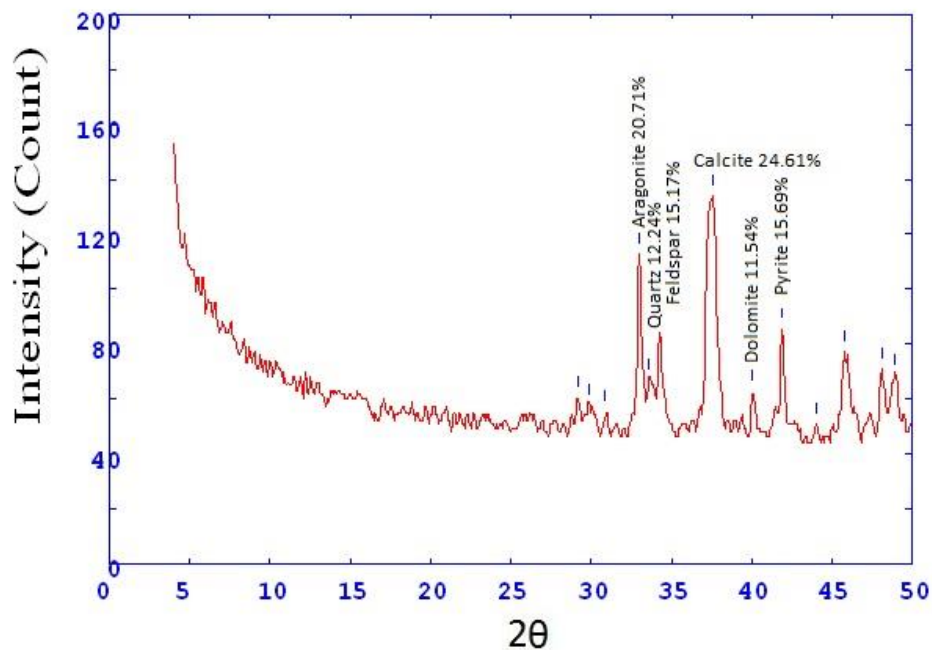

Fig.S7-6 X ray diffractogram of core 4 sample no.6

| 2Theta | d (A)          | Height | Area    | FWHM   | Identified mineral        | WT%      |
|--------|----------------|--------|---------|--------|---------------------------|----------|
| 13.147 | <b>8.4559</b>  | 79     | 1170.7  | 0.3364 | Illite                    | 8.072757 |
| 14.487 | <b>7.67717</b> | 254.9  | 1170.7  | 0.3364 | Gypsum                    | 26.04741 |
| 22.948 | 4.8662         | 62.3   | 12532   | 0.3364 | -                         |          |
| 26.015 | 4.30078        | 74.3   | 12504   | 0.3364 | -                         |          |
| 29.389 | 3.81615        | 79.1   | 13578.7 | 0.3364 | -                         |          |
| 32.901 | <b>3.41834</b> | 103.4  | 17747.4 | 0.4219 | Aragonite                 | 10.56611 |
| 33.524 | <b>3.3566</b>  | 146.4  | 1085.3  | 0.5074 | Quartz                    | 14.96015 |
| 34.11  | <b>3.30055</b> | 80.5   | 597.2   | 1.2093 | feldspar<br>(orthoclase ) | 8.226037 |
| 36.63  | <b>3.08053</b> | 66.8   | 495.4   | 1.5602 | Albite                    | 6.826078 |
| 37.338 | <b>3.02411</b> | 102    | 2962.7  | 1.9111 | calcite                   | 10.42305 |
| 39.149 | <b>2.88932</b> | 62.2   | 1807.4  | 1.9111 | dolomite                  | 6.356019 |
| 41.833 | <b>2.71147</b> | 83.4   | 13330.7 | 1.9111 | Pyrite                    | 8.522379 |
| 45.75  | 2.49026        | 77.1   | 12605.3 | 1.9111 | Gypsum                    |          |
| 47.111 | 2.42224        | 59.2   | 9673.6  | 1.9111 | Gypsum                    |          |
| 48     | 2.37997        | 71     | 12250.7 | 1.9111 | Gypsum                    |          |
| 48.724 | 2.34673        | 63.8   | 11002   | 1.9111 | Aragonite                 |          |
| 50.6   | 2.26513        | 60     | 12385.3 | 1.9111 | Gypsum                    |          |
| 52.5   | 2.18866        | 55.1   | 12092   | 1.9111 | dolomite                  |          |
| 54.569 | 2.11169        | 56.9   | 12481.3 | 1.9111 | -                         |          |
| 55.433 | 2.08132        | 63.8   | 11328   | 1.9111 | -                         |          |
| 58.5   | 1.98113        | 84.5   | 8129.3  | 1.9111 | -                         |          |
| Total  |                | 978.6  |         |        |                           |          |

Table S4-7 X ray diffraction data of core 4 sample no.7

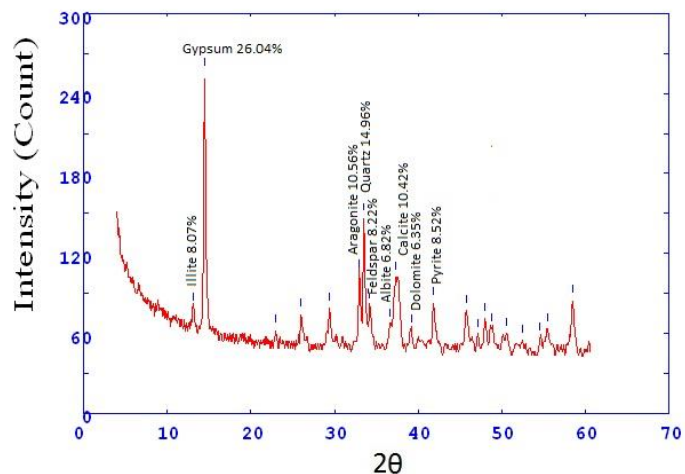

Fig.S7-7 X ray diffractogram of core 4 sample no.7

| 2Theta | d (A)          | Height | Area    | FWHM   | Identified mineral     | WT%      |
|--------|----------------|--------|---------|--------|------------------------|----------|
| 14.54  | <b>7.6496</b>  | 73     | 13630.7 | 0      | Gypsum                 | 15.04844 |
| 26.221 | 4.26761        | 88.3   | 11534.7 | 0      | Gypsum                 |          |
| 29.367 | 3.81897        | 60.6   | 12262.7 | 0      | -                      |          |
| 29.803 | 3.76435        | 58.8   | 11903.2 | 0.9876 | -                      |          |
| 30.864 | 3.6379         | 54     | 10929.2 | 1.4814 | -                      |          |
| 33.027 | <b>3.40563</b> | 113.7  | 2874.7  | 1.9752 | Aragonite              | 23.43847 |
| 34.136 | <b>3.29812</b> | 82.1   | 2075.9  | 1.4726 | Quartz                 | 16.92435 |
| 37.533 | <b>3.00894</b> | 131    | 1926.7  | 0.9699 | calcite                | 27.00474 |
| 41.879 | <b>2.70863</b> | 85.3   | 12586.7 | 0.9699 | Pyrite                 | 17.584   |
| 45.817 | 2.48683        | 76.3   | 11912   | 0.9699 | Gypsum                 |          |
| 47.136 | 2.42102        | 59.2   | 9256.1  | 0.9699 | gypsum                 |          |
| 48.1   | 2.37531        | 70.3   | 11564   | 0.9699 | gypsum                 |          |
| 48.817 | 2.34253        | 64.9   | 10677.9 | 0.9699 | -                      |          |
| 50.585 | 2.26573        | 60.5   | 9951.3  | 0.9699 | feldspar (orthoclase ) |          |
| 52.519 | 2.18792        | 57.2   | 7060    | 0.9699 | Aragonite              |          |
| Total  |                | 485.1  |         |        |                        |          |

Table S4-8 X ray diffraction data of core 4 sample no.8

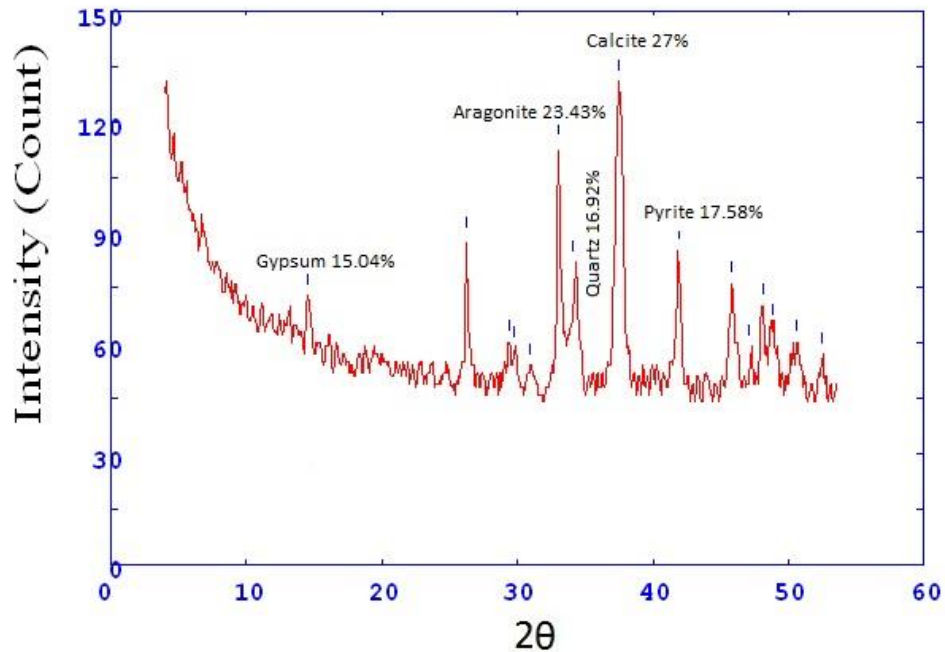

Fig.S7-8 X ray diffractogram of core 4 sample no.8

| 2Theta | d (A)          | Height | Area    | FWHM   | Identified mineral        | WT%      |
|--------|----------------|--------|---------|--------|---------------------------|----------|
| 26.3   | 4.25501        | 59.3   | 11653.3 | 0      | -                         | 0        |
| 29.083 | 3.85536        | 68.3   | 12318.7 | 0      | -                         |          |
| 32.97  | <b>3.41133</b> | 81.5   | 14711.3 | 1.1524 | Aragonite                 | 10.51613 |
| 33.619 | <b>3.34739</b> | 110.7  | 3404    | 2.3048 | Quartz                    | 14.28387 |
| 34.238 | <b>3.28859</b> | 71.9   | 2211.8  | 1.8904 | feldspar<br>(orthoclase ) | 9.277419 |
| 34.745 | <b>3.24204</b> | 105.5  | 3243.1  | 1.4761 | Albite                    | 13.6129  |
| 37.274 | <b>3.02914</b> | 215.2  | 1869.3  | 0.6474 | calcite                   | 27.76774 |
| 38.802 | <b>2.91415</b> | 63.7   | 553.5   | 0.6474 | dolomite                  | 8.219355 |
| 40.07  | <b>2.82556</b> | 59.6   | 517.8   | 0.6474 | halite                    | 7.690323 |
| 41.9   | <b>2.70735</b> | 66.9   | 13498.7 | 0.6474 | Pyrite                    | 8.632258 |
| 45.744 | 2.49055        | 82.1   | 11736   | 0.6474 | -                         |          |
| 48.067 | 2.37686        | 59     | 9445.3  | 0.6474 | -                         |          |
| 50.256 | 2.27963        | 70.1   | 7308    | 0.6474 | Aragonite                 |          |
| Total  |                | 775    |         |        |                           |          |

Table S4-9 X ray diffraction data of core 4 sample no.9

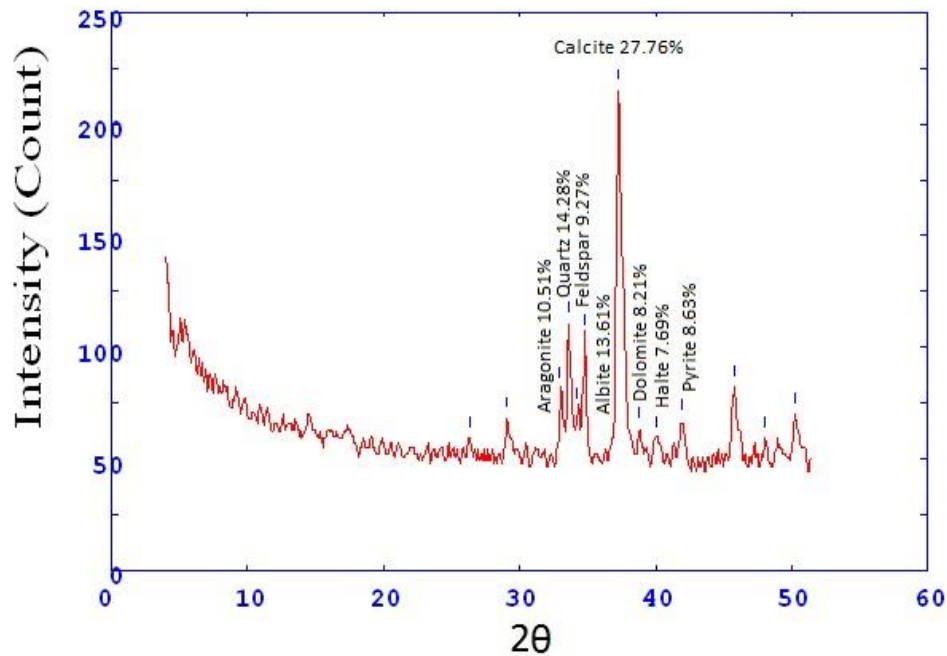

Fig.S7-9 X ray diffractogram of core 4 sample no.9



| 2Theta | d (A)          | Height | Area   | FWHM   | Identified mineral        | WT%      |
|--------|----------------|--------|--------|--------|---------------------------|----------|
| 13.212 | <b>8.41467</b> | 116.7  | 2539.2 | 0.5017 | Illite                    | 24.15649 |
| 14.634 | <b>7.60095</b> | 328.4  | 2539.2 | 0.5017 | Gypsum                    | 67.97764 |
| 23.548 | 4.74408        | 13.7   | 41.4   | 0.2592 | -                         |          |
| 26.08  | 4.29032        | 91.9   | 352.2  | 0.3322 | -                         |          |
| 26.724 | <b>4.18869</b> | 25.7   | 98.3   | 0.2948 | Goethite                  | 5.31981  |
| 29.467 | 3.80626        | 223    | 629    | 0.2574 | -                         |          |
| 30.417 | 3.69007        | 15.4   | 43.5   | 0.2616 | -                         |          |
| 33.102 | <b>3.39808</b> | 27.7   | 78.1   | 0.2638 | Aragonite                 | 5.733803 |
| 33.6   | <b>3.34918</b> | 91.2   | 269.5  | 0.2659 | Quartz                    | 18.87808 |
| 34.445 | <b>3.26939</b> | 16.4   | 48.6   | 0.2844 | feldspar<br>(orthoclase ) | 3.394742 |
| 35.369 | <b>3.18667</b> | 16.4   | 48.6   | 0.303  | Albite                    | 3.394742 |
| 36.772 | <b>3.06899</b> | 99.6   | 394.8  | 0.3401 | Calcite                   | 20.61685 |
| 39.325 | <b>2.87692</b> | 35.9   | 235.8  | 0.5165 | dolomite                  | 7.431174 |
| 42.234 | <b>2.68692</b> | 39.8   | 188.3  | 0.385  | Pyrite                    | 8.23846  |
| 43.761 | 2.5975         | 9.3    | 44     | 0.383  | -                         |          |
| 45.713 | 2.49215        | 18.2   | 77.3   | 0.381  | gypsum                    |          |
| 48.1   | 2.37531        | 12.6   | 34.7   | 0.25   | Gypsum                    |          |
| Total  |                | 483.1  |        |        |                           |          |

Table S5-1 X ray diffraction data of core 5 sample no.1

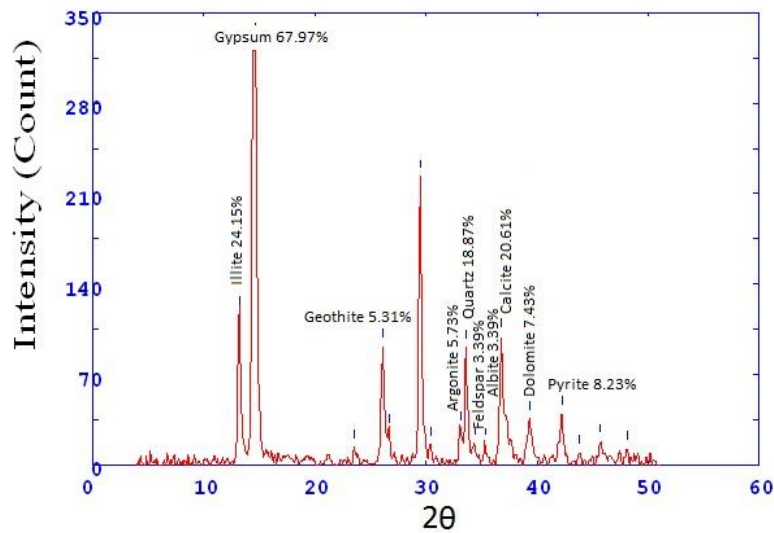

Fig.S8-1 X ray diffractogram of core 5 sample no.1

| 2Theta | d (A)          | Height | Area  | FWHM   | Identified mineral        | WT%      |
|--------|----------------|--------|-------|--------|---------------------------|----------|
| 14.591 | <b>7.62305</b> | 53.5   | 113.8 | 0.2546 | Gypsum                    | 10.33217 |
| 25.082 | 4.45809        | 10.2   | 21.6  | 0.2793 | -                         | 0        |
| 26.258 | 4.26177        | 28     | 97.5  | 0.304  | -                         |          |
| 29.228 | 3.83676        | 12.6   | 43.7  | 0.2963 | -                         |          |
| 33.112 | <b>3.39712</b> | 45.4   | 157.7 | 0.2885 | Aragonite                 | 8.767864 |
| 33.644 | <b>3.34493</b> | 154.4  | 558.7 | 0.273  | Quartz                    | 29.81846 |
| 34.692 | <b>3.24682</b> | 41     | 148.5 | 0.3154 | feldspar<br>(orthoclase ) | 7.918115 |
| 35.352 | <b>3.18815</b> | 15.5   | 56    | 0.3365 | Albite                    | 2.993434 |
| 35.728 | 3.1556         | 9.2    | 33.3  | 0.3471 | -                         |          |
| 37.261 | <b>3.03017</b> | 132.2  | 645.8 | 0.3577 | Calcite                   | 25.53109 |
| 39.101 | <b>2.89276</b> | 38.1   | 217.7 | 0.4269 | dolomite                  | 7.358053 |
| 41.982 | <b>2.70227</b> | 37.7   | 152.7 | 0.3288 | Pyrite                    | 7.280803 |
| 43.976 | 2.58542        | 7.3    | 29.5  | 0.3732 | -                         |          |
| 45.848 | 2.48523        | 38.7   | 209.3 | 0.4176 | Gypsum                    |          |
| 48.078 | 2.37636        | 20.6   | 228.5 | 0.7149 | Gypsum                    |          |
| 48.915 | 2.33813        | 14.5   | 160.9 | 0.5387 | Aragonite                 |          |
| 50.217 | 2.28127        | 29.9   | 134.3 | 0.3626 | feldspar<br>(orthoclase ) |          |
| 52.435 | 2.19118        | 14.9   | 66.5  | 0.3097 | dolomite                  |          |
| 55.167 | 2.09059        | 24.2   | 271.9 | 0.8289 | -                         |          |
| 58.592 | 1.9783         | 32.7   | 156   | 0.3581 | -                         |          |
| Total  |                | 517.8  |       |        |                           |          |

Table S5-2 X ray diffraction data of core 5 sample no.2

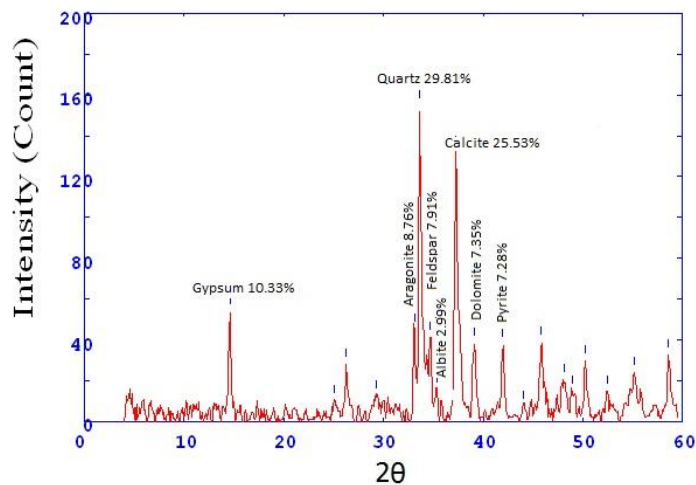

Fig.S8-2 X ray diffractogram of core 5 sample no.2

| 2Theta | d (A)          | Height | Area    | FWHM   | Identified mineral        | WT%      |
|--------|----------------|--------|---------|--------|---------------------------|----------|
| 26.344 | 4.24796        | 65.2   | 11717.3 | 0      | -                         |          |
| 29.414 | 3.81293        | 62.2   | 13189.3 | 0      | -                         | 0        |
| 29.96  | 3.74497        | 61.3   | 13007.8 | 0.4405 | -                         |          |
| 30.631 | 3.6649         | 58.5   | 12421.6 | 1.1012 | -                         |          |
| 33.156 | <b>3.39279</b> | 141.7  | 3205.3  | 1.7619 | Aragonite                 | 19.05082 |
| 33.732 | <b>3.33647</b> | 126.9  | 2871.5  | 1.5878 | Quartz                    | 17.06104 |
| 34.402 | <b>3.27336</b> | 98.9   | 2238.7  | 1.4137 | feldspar<br>(orthoclase ) | 13.29659 |
| 35.324 | <b>3.19055</b> | 58.9   | 1332.4  | 1.2396 | Albite                    | 7.918795 |
| 36.078 | 3.126          | 55.4   | 1254.3  | 1.1526 | -                         |          |
| 37.336 | <b>3.02431</b> | 100    | 2262.1  | 1.1091 | Calcite                   | 13.44447 |
| 37.808 | 2.98789        | 131.1  | 2088    | 1.0656 | -                         |          |
| 39.096 | <b>2.89313</b> | 59.6   | 949     | 1.6411 | dolomite                  | 8.012907 |
| 40.101 | <b>2.82345</b> | 56.5   | 899.5   | 1.785  | Halite                    | 7.596128 |
| 41.526 | 2.73064        | 61     | 971     | 1.9289 | -                         |          |
| 42.013 | <b>2.70042</b> | 101.3  | 2741.3  | 2.2167 | Pyrite                    | 13.61925 |
| 45.919 | 2.48159        | 87.2   | 12380   | 2.2167 | -                         |          |
| 47.393 | 2.40868        | 64.8   | 9198    | 2.2167 | -                         |          |
| 48.156 | 2.37271        | 91.1   | 9693.3  | 2.2167 | -                         |          |
| 48.901 | 2.33874        | 78.6   | 0       | 0      | Aragonite                 |          |
| 50.242 | 2.28021        | 62.3   | 0       | 0      | feldspar<br>(orthoclase ) |          |
| Total  |                | 743.8  |         |        |                           |          |

Table S5-3 X ray diffraction data of core 5 sample no.3

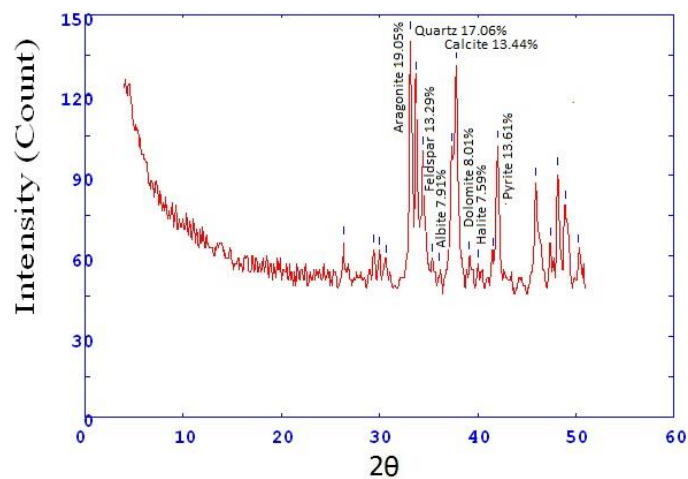

Fig.S8-3 X ray diffractogram of core 5 sample no.3

| 2Theta | d (A)          | Height | Area    | FWHM   | Identified mineral        | WT%      |
|--------|----------------|--------|---------|--------|---------------------------|----------|
| 33.085 | <b>3.39984</b> | 126.8  | 1722.7  | 1.0667 | Aragonite                 | 21.80567 |
| 33.553 | <b>3.35377</b> | 76.4   | 1037.3  | 1.0883 | Quartz                    | 13.13844 |
| 34.238 | <b>3.28857</b> | 95.7   | 1299.7  | 1.11   | feldspar<br>(orthoclase ) | 16.45744 |
| 37.7   | <b>2.99612</b> | 129    | 2336    | 1.1533 | dolomite                  | 22.18401 |
| 40.1   | <b>2.82353</b> | 57.3   | 12921.3 | 1.1533 | halite                    | 9.853826 |
| 41.985 | <b>2.70212</b> | 96.3   | 1978.7  | 1.5333 | Pyrite                    | 16.56062 |
| 45.875 | 2.48384        | 90.1   | 9462.7  | 5.7    | -                         | 0        |
| 47.361 | 2.41017        | 57.4   | 6031.1  | 5.7    | -                         |          |
| 48.133 | 2.37377        | 85     | 12134.7 | 5.7    | -                         |          |
| 48.928 | 2.33751        | 72.4   | 10339.1 | 5.7    | Aragonite                 |          |
| 50.299 | 2.27777        | 59.4   | 8481.9  | 5.7    | feldspar<br>(orthoclase ) |          |
| 50.933 | 2.25128        | 62     | 12364   | 5.7    | -                         |          |
| 52.258 | 2.19807        | 57.4   | 11455.1 | 5.7    | dolomite                  |          |
| 54.742 | 2.10552        | 70.1   | 10548   | 5.7    | -                         |          |
| 55.882 | 2.06595        | 59.8   | 8999    | 3.3056 | -                         |          |
| 56.959 | 2.03005        | 57     | 8583.8  | 2.1083 | -                         |          |
| 58.642 | 1.97675        | 99     | 1229.3  | 0.9111 | -                         |          |
| Total  |                | 581.6  |         |        |                           |          |

Table S5-4 X ray diffraction data of core 5 sample no.4

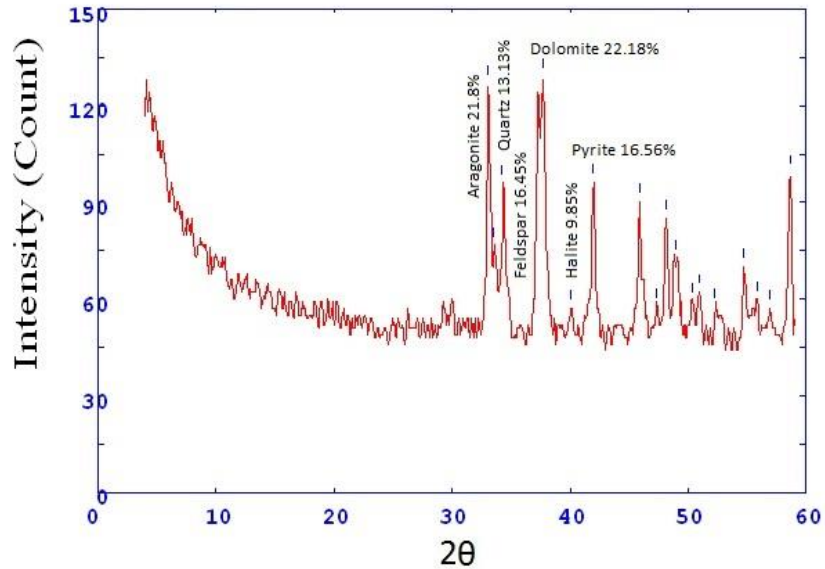

Fig.S8-4 X ray diffractogram of core 5 sample no.4

| 2Theta | d (A)          | Height | Area   | FWHM   | Identified mineral        | WT%      |
|--------|----------------|--------|--------|--------|---------------------------|----------|
| 29.301 | 3.82728        | 10.3   | 32.1   | 0.1989 | -                         |          |
| 30.415 | 3.69027        | 17.2   | 32.1   | 0.1989 | -                         | 0        |
| 33.11  | <b>3.39737</b> | 74.4   | 139    | 0.2336 | Aragonite                 | 18.81639 |
| 33.641 | <b>3.34522</b> | 122.5  | 359.2  | 0.2682 | Quartz                    | 30.98128 |
| 34.347 | <b>3.27844</b> | 40.5   | 118.7  | 0.5226 | feldspar<br>(orthoclase ) | 10.24279 |
| 37.707 | <b>2.99559</b> | 93.1   | 1131.2 | 0.7769 | calcite                   | 23.54578 |
| 38.917 | <b>2.90588</b> | 14.5   | 176.5  | 0.6549 | dolomite                  | 3.667172 |
| 40.194 | <b>2.81719</b> | 16.2   | 107.5  | 0.5329 | halite                    | 4.097117 |
| 41.488 | 2.73305        | 9.6    | 63.5   | 0.4416 | -                         |          |
| 41.983 | <b>2.70222</b> | 34.2   | 139.8  | 0.3504 | Pyrite                    | 8.649469 |
| 44.233 | 2.57114        | 7.1    | 39.8   | 0.3775 | -                         |          |
| 45.833 | 2.48599        | 36.8   | 266.8  | 0.6452 | Quartz                    |          |
| 48.14  | 2.37344        | 27.6   | 90.3   | 0.3078 | Pyrite                    |          |
| 49.009 | 2.33391        | 21.4   | 70.1   | 0.3765 | Aragonite                 |          |
| 50.437 | 2.27198        | 15.7   | 51.3   | 0.4109 | Pyrite                    |          |
| 52.466 | 2.18996        | 13.9   | 87.3   | 0.4453 | dolomite                  |          |
| 55.833 | 2.06759        | 16.1   | 408.3  | 1.6143 | -                         |          |
| Total  |                | 395.4  |        |        |                           |          |

Table S6-1 X ray diffraction data of core 6 sample no.1

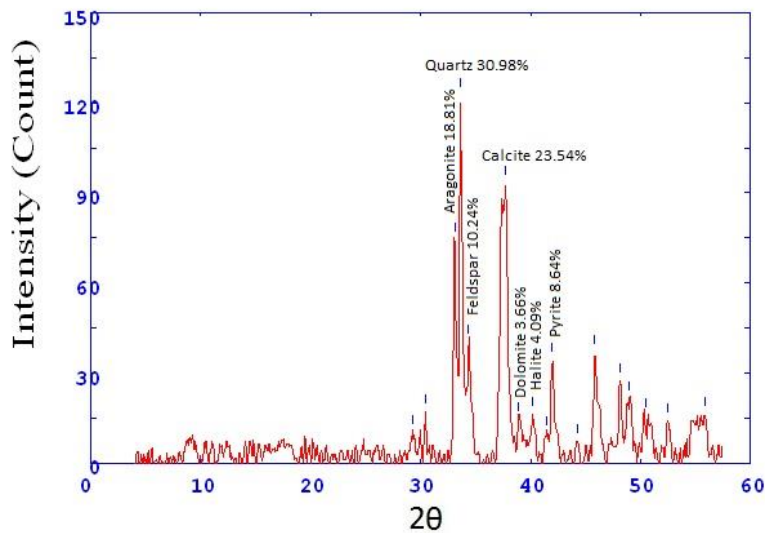

Fig.S9-1 X ray diffractogram of core 6 sample no.1

| 2Theta | d (A)          | Height | Area   | FWHM   | Identified mineral       | WT%      |
|--------|----------------|--------|--------|--------|--------------------------|----------|
| 26.215 | 4.26852        | 16.7   | 46.9   | 0.2115 | -                        | 0        |
| 29.433 | 3.81058        | 13.6   | 78.4   | 0.4351 | -                        |          |
| 33.044 | <b>3.40397</b> | 75.8   | 227.4  | 0.2787 | Aragonite                | 22.27446 |
| 33.597 | <b>3.34945</b> | 42.4   | 127.2  | 0.4976 | Quartz                   | 12.45959 |
| 34.296 | <b>3.28317</b> | 43.1   | 129.2  | 0.607  | feldspar<br>(orthoclase) | 12.6653  |
| 35.345 | <b>3.18876</b> | 5      | 15.1   | 0.6617 | feldspar (Albite)        | 1.469292 |
| 36.131 | 3.1216         | 5      | 15.1   | 0.6891 | -                        |          |
| 37.662 | <b>2.99903</b> | 104.9  | 1051.4 | 0.7164 | Calcite                  | 30.82574 |
| 38.839 | <b>2.91146</b> | 14     | 140.8  | 0.5365 | dolomite                 | 4.114017 |
| 39.975 | <b>2.83198</b> | 11.4   | 114    | 0.4465 | halite                   | 3.349985 |
| 41.9   | <b>2.70735</b> | 43.7   | 180.2  | 0.3565 | Pyrite                   | 12.84161 |
| 45.82  | 2.48666        | 36.4   | 318.5  | 0.6795 | -                        |          |
| 47.14  | 2.42086        | 15.4   | 134.4  | 0.5137 | Aragonite                |          |
| 48.085 | 2.376          | 27.3   | 115.1  | 0.348  | Aragonite                |          |
| 48.8   | 2.3433         | 25.1   | 105.5  | 0.7028 | feldspar                 |          |
| 50.5   | 2.26932        | 14.1   | 234.4  | 1.0575 | Pyrite                   |          |
| 52.4   | 2.19254        | 16     | 138.7  | 0.644  | dolomite                 |          |
| Total  |                | 340.3  |        |        |                          |          |

Table S6-2 X ray diffraction data of core 6 sample no.2

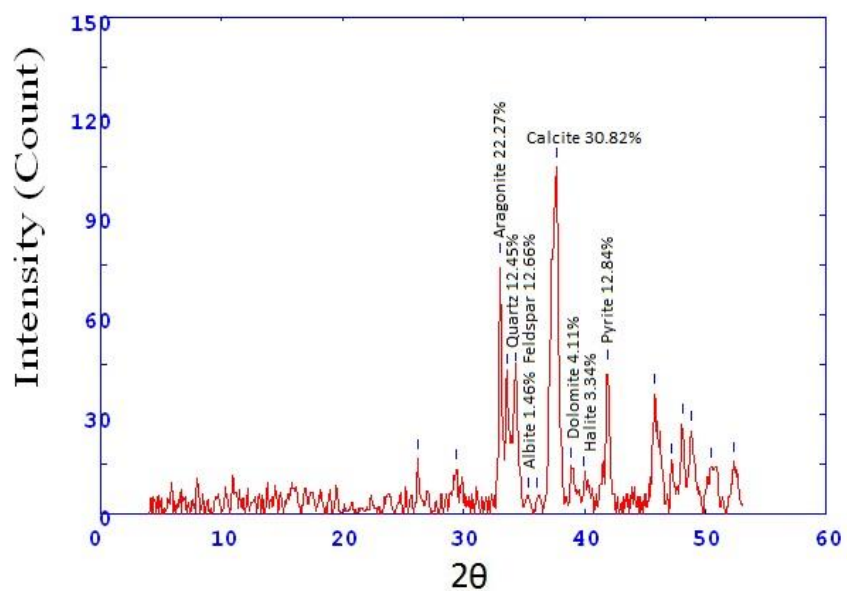

Fig.S9-2 X ray diffractogram of core 6 sample no.2

| 2Theta | d (A)          | Height | Area    | FWHM   | Identified mineral        | WT%      |
|--------|----------------|--------|---------|--------|---------------------------|----------|
| 23.867 | 4.68155        | 51     | 9598.7  | 0      | -                         |          |
| 26.267 | 4.26032        | 57     | 9589.3  | 0      | -                         | 0        |
| 29.367 | 3.81897        | 54.3   | 9978.7  | 0      | -                         |          |
| 33.047 | <b>3.40366</b> | 82.7   | 4228    | 4.1333 | Aragonite                 | 17.69741 |
| 33.723 | <b>3.33733</b> | 54.7   | 2798.5  | 3.3569 | Quartz                    | 11.70554 |
| 34.352 | <b>3.27801</b> | 65.6   | 3352.7  | 2.5806 | feldspar<br>(orthoclase ) | 14.03809 |
| 35.071 | <b>3.21287</b> | 56.2   | 2873.4  | 1.8042 | feldspar (Albite )        | 12.02654 |
| 36.239 | 3.11261        | 50     | 2558.9  | 1.416  | -                         |          |
| 37.227 | <b>3.03277</b> | 89.3   | 4565.9  | 1.2219 | Calcite                   | 19.10978 |
| 37.627 | 3.00174        | 91.8   | 1522.7  | 1.0278 | -                         |          |
| 38.486 | 2.93721        | 50.9   | 844.5   | 1.0278 | -                         |          |
| 39.115 | <b>2.89178</b> | 52.7   | 873.7   | 1.0278 | dolomite                  | 11.27755 |
| 41.922 | <b>2.70598</b> | 66.1   | 10238.7 | 1.0278 | Pyrite                    | 14.14509 |
| 44     | 2.5841         | 51     | 9857.3  | 1.0278 | -                         |          |
| 45.767 | 2.48941        | 65.6   | 9922.7  | 1.0278 | -                         |          |
| 48.033 | 2.37841        | 59.3   | 9829.3  | 1.0278 | Aragonite                 |          |
| 48.999 | 2.33433        | 56.8   | 9418.3  | 1.0278 | -                         |          |
| 50.168 | 2.28337        | 55.6   | 9224    | 1.0278 | Pyrite                    |          |
| 52.533 | 2.18737        | 52     | 6673.3  | 1.0278 | dolomite                  |          |
| 54.1   | 2.1286         | 54.4   | 5157.3  | 1.0278 | -                         |          |
| Total  |                | 467.3  |         |        |                           |          |

Table S6-3 X ray diffraction data of core 6 sample no.3

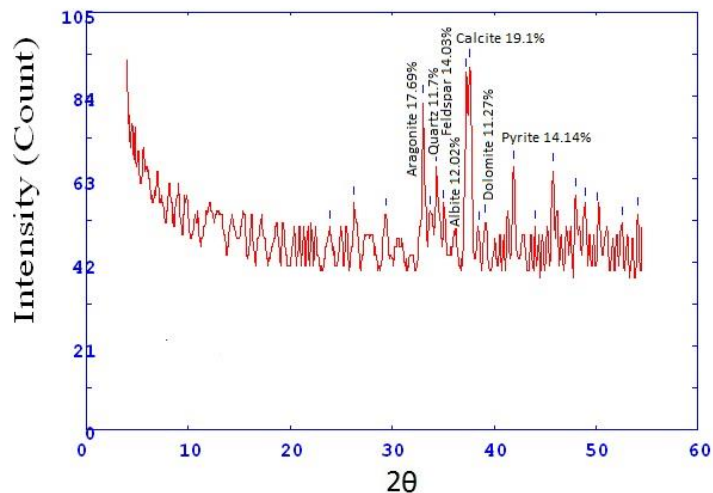

Fig.S9-3 X ray diffractogram of core 6 sample no.3

| 2Theta | d (A)          | Height | Area   | FWHM   | Identified mineral        | WT%      |
|--------|----------------|--------|--------|--------|---------------------------|----------|
| 29.874 | 3.7555         | 13.3   | 11.9   | 0.1432 | -                         |          |
| 33.009 | <b>3.4074</b>  | 80.9   | 259.4  | 0.3146 | Aragonite                 | 24.47066 |
| 33.509 | <b>3.35803</b> | 28.8   | 92.4   | 0.5123 | Quartz                    | 8.711434 |
| 34.184 | <b>3.29359</b> | 50.3   | 161.3  | 0.6111 | feldspar<br>(orthoclase ) | 15.21476 |
| 37.54  | <b>3.00843</b> | 99.4   | 1046.7 | 0.71   | Calcite                   | 30.06655 |
| 39.396 | <b>2.87193</b> | 4.8    | 50.2   | 0.4886 | dolomite                  | 1.451906 |
| 40.074 | <b>2.82528</b> | 14.3   | 46     | 0.2672 | halite                    | 4.325469 |
| 41.423 | 2.73715        | 13.6   | 43.6   | 0.2843 | -                         |          |
| 41.904 | <b>2.70708</b> | 52.1   | 164.8  | 0.3014 | Pyrite                    | 15.75923 |
| 45.75  | 2.49028        | 35.9   | 207.5  | 0.4446 | Aragonite                 |          |
| 47.213 | 2.4173         | 15.5   | 89.8   | 0.4404 | Aragonite                 |          |
| 48.034 | 2.37839        | 30.6   | 188.8  | 0.4362 | Aragonite                 |          |
| 48.661 | 2.34957        | 25.6   | 158.1  | 0.8919 | Aragonite                 |          |
| 50.109 | 2.28589        | 15.8   | 97.7   | 1.1198 | feldspar                  |          |
| 50.784 | 2.25745        | 15.2   | 93.8   | 1.2337 | Pyrite                    |          |
| 52.633 | 2.18353        | 11     | 210.9  | 1.3476 | dolomite                  |          |
| 54.683 | 2.10762        | 19     | 137.1  | 0.4854 | Aragonite                 |          |
| 55.61  | 2.07524        | 16.2   | 116.8  | 0.3883 | -                         |          |
| Total  |                | 330.6  |        |        |                           |          |

Table S6-4 X ray diffraction data of core 6 sample no.4

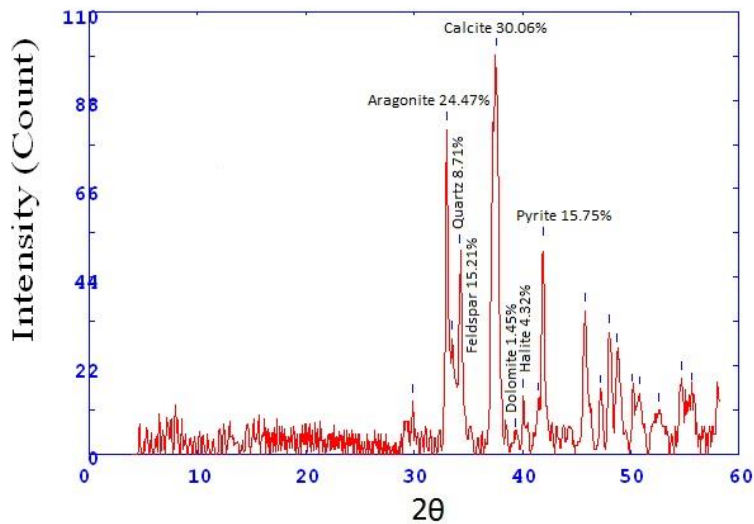

Fig.S9-4 X ray diffractogram of core 6 sample no.4



| 2Theta | d (A)          | Height | Area   | FWHM   | Identified mineral        | WT%      |
|--------|----------------|--------|--------|--------|---------------------------|----------|
| 29.108 | 3.85221        | 15.7   | 81     | 0.2201 | -                         | 0        |
| 30.352 | 3.69781        | 41.5   | 81     | 0.2201 | -                         |          |
| 32.954 | <b>3.41298</b> | 68.8   | 134.2  | 0.226  | Aragonite                 | 12.92019 |
| 33.59  | <b>3.35016</b> | 194.7  | 411.6  | 0.2319 | Quartz                    | 36.56338 |
| 34.321 | <b>3.28084</b> | 39.7   | 84     | 0.4562 | feldspar<br>(orthoclase ) | 7.455399 |
| 36.202 | <b>3.1157</b>  | 7.3    | 15.4   | 0.5684 | Albite                    | 1.370892 |
| 37.284 | <b>3.02836</b> | 143.6  | 1363.8 | 0.6805 | Calcite                   | 26.96714 |
| 40.085 | <b>2.82456</b> | 41     | 160.2  | 0.3105 | dolomite                  | 7.699531 |
| 41.9   | <b>2.70732</b> | 37.4   | 116.1  | 0.3034 | Pyrite                    | 7.023474 |
| 44.065 | 2.58048        | 6.2    | 19.2   | 0.3802 | -                         |          |
| 45.767 | 2.48941        | 48.1   | 293    | 0.4569 | -                         |          |
| 47.142 | 2.42075        | 12.3   | 75.2   | 0.3729 | Aragonite                 |          |
| 48.022 | 2.37893        | 27.5   | 87.7   | 0.2888 | Aragonite                 |          |
| 48.851 | 2.34097        | 20.2   | 64.3   | 0.4764 | Aragonite                 |          |
| 50.4   | 2.27353        | 21.8   | 183.3  | 0.664  | Pyrite                    |          |
| Total  |                | 352.5  |        |        |                           |          |

Table S6-5 X ray diffraction data of core 6 sample no.5

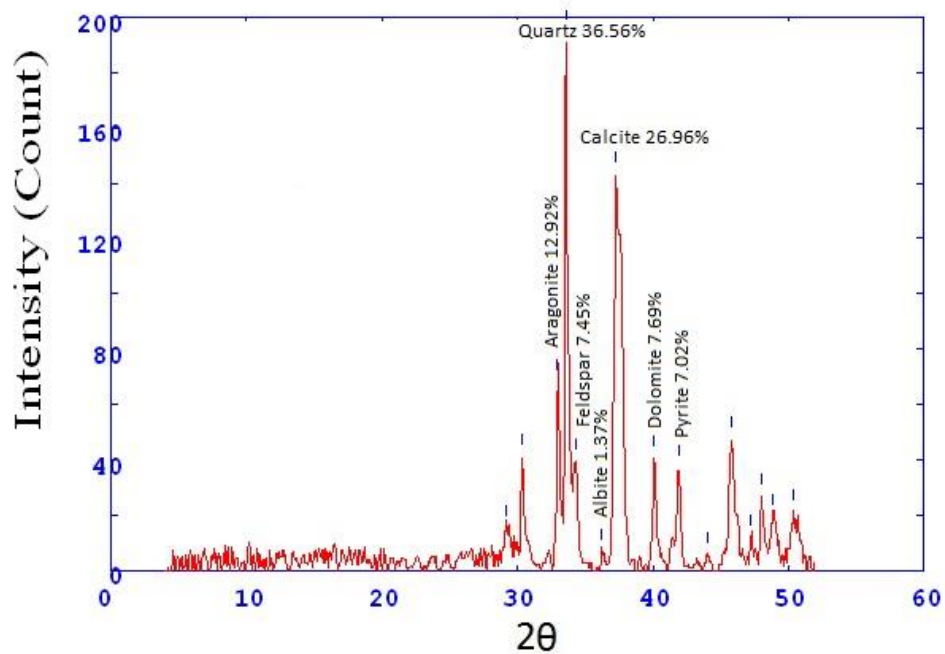

Fig.S9-5 X ray diffractogram of core 6 sample no.5

| 2Theta | d (A)   | Height | Area   | FWHM   | Identified mineral        | WT%      |
|--------|---------|--------|--------|--------|---------------------------|----------|
| 13.083 | 8.4971  | 28.8   | 77.7   | 0.2813 | Illite                    | 3.169014 |
| 14.609 | 7.61383 | 21.3   | 76.1   | 0.296  | Gypsum                    | 2.34375  |
| 17.369 | 6.41117 | 17.4   | 89.6   | 0.4373 | -                         |          |
| 23.864 | 4.68212 | 13.5   | 67     | 0.3772 | -                         |          |
| 26.291 | 4.25642 | 165.2  | 458    | 0.2596 | -                         |          |
| 27.655 | 4.05034 | 31.1   | 86.1   | 0.2552 | -                         |          |
| 30.448 | 3.68636 | 89.9   | 191.3  | 0.2508 | Aragonite                 | 9.892165 |
| 33.633 | 3.34597 | 329.3  | 1882.8 | 0.4046 | Quartz                    | 36.2346  |
| 34.749 | 3.24171 | 139.5  | 797.5  | 0.3824 | feldspar<br>(orthoclase ) | 15.34991 |
| 35.347 | 3.18855 | 121.9  | 697.1  | 0.3712 | Albite                    | 13.41329 |
| 37.278 | 3.02882 | 63.4   | 308.6  | 0.3601 | calcite                   | 6.976232 |
| 39.106 | 2.89242 | 88.8   | 474.7  | 0.4111 | dolomite                  | 9.771127 |
| 40.133 | 2.82128 | 25.9   | 138.5  | 0.8705 | halite                    | 2.849912 |
| 46.4   | 2.45727 | 32     | 114.2  | 0.3333 | Aragonite, gypsum         |          |
| 50.219 | 2.28118 | 36.6   | 142    | 0.3108 | Pyrite                    |          |
| 51.244 | 2.23853 | 24.9   | 0      | 0      | Gypsum                    |          |
| Total  |         | 908.8  |        |        |                           |          |

Table S6-6 X ray diffraction data of core 6 sample no.6

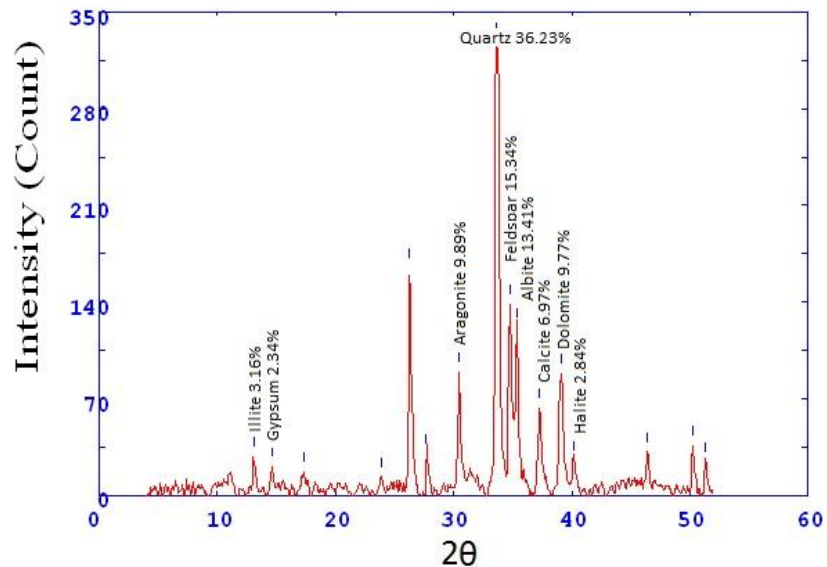

Fig.S9-6 X ray diffractogram of core 6 sample no.6

| 2Theta | d (A)   | Height | Area   | FWHM   | Identified mineral        | WT%      |
|--------|---------|--------|--------|--------|---------------------------|----------|
| 26.275 | 4.25892 | 32     | 96.9   | 0.2941 | -                         |          |
| 29.003 | 3.8658  | 14.4   | 43.6   | 0.2947 | -                         | 0        |
| 29.683 | 3.77913 | 28.2   | 84.6   | 0.2954 | -                         |          |
| 30.426 | 3.68901 | 13.9   | 41.9   | 0.3045 | Aragonite                 | 3.020426 |
| 33.63  | 3.34628 | 147    | 541.2  | 0.3136 | Quartz                    | 31.94263 |
| 34.694 | 3.24667 | 34.1   | 125.7  | 0.4636 | feldspar<br>(orthoclase ) | 7.409822 |
| 35.112 | 3.20918 | 26.5   | 97.6   | 0.5386 | feldspar ( Albite )       | 5.758366 |
| 37.265 | 3.02986 | 140    | 1074.2 | 0.6136 | calcite                   | 30.42156 |
| 39.072 | 2.89481 | 73.8   | 382.7  | 0.4123 | dolomite                  | 16.03651 |
| 39.966 | 2.83258 | 13.5   | 70     | 0.3169 | halite                    | 2.933507 |
| 41.913 | 2.70657 | 11.4   | 23.2   | 0.2215 | Pyrite                    | 2.477184 |
| 45.833 | 2.48598 | 27.8   | 320.7  | 0.8956 | -                         |          |
| 47.247 | 2.41566 | 12.2   | 140.1  | 0.7729 | Aragonite                 |          |
| 48.837 | 2.34159 | 11.3   | 129.8  | 0.7116 | Aragonite                 |          |
| 50.214 | 2.28139 | 29.6   | 255.5  | 0.6503 | feldspar                  |          |
| Total  |         | 460.2  |        |        |                           |          |

Table S6-7 X ray diffraction data of core 6 sample no.7

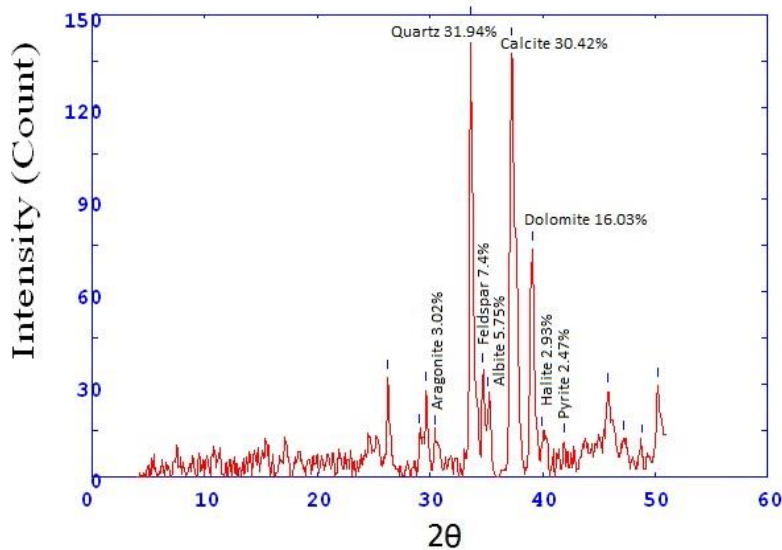

Fig.S9-7 X ray diffractogram of core 6 sample no.7

| 2Theta | d (A)          | Height | Area  | FWHM   | Identified mineral        | WT%      |
|--------|----------------|--------|-------|--------|---------------------------|----------|
| 24.891 | 4.49172        | 13.9   | 142.1 | 0.242  | -                         | 0        |
| 26.279 | 4.25843        | 51.7   | 142.1 | 0.242  | -                         |          |
| 27.029 | <b>4.1423</b>  | 9.5    | 26.1  | 0.2925 | Goethite                  | 2.071974 |
| 27.68  | 4.04677        | 8.4    | 23    | 0.3051 | -                         |          |
| 29.074 | 3.85659        | 10.6   | 29.1  | 0.3177 | -                         |          |
| 30.411 | 3.69075        | 24.1   | 94.3  | 0.343  | -                         |          |
| 33.071 | <b>3.40126</b> | 29.5   | 115.3 | 0.2901 | Aragonite                 | 6.434024 |
| 33.65  | <b>3.34437</b> | 194.9  | 421.2 | 0.2373 | Quartz                    | 42.50818 |
| 34.837 | <b>3.23378</b> | 39.5   | 85.3  | 0.3018 | feldspar<br>(orthoclase ) | 8.615049 |
| 37.267 | <b>3.02969</b> | 113.4  | 541.7 | 0.3663 | calcite                   | 24.73282 |
| 39.1   | <b>2.89279</b> | 53     | 266.3 | 0.3992 | dolomite                  | 11.55943 |
| 41.996 | <b>2.70143</b> | 18.7   | 92.2  | 0.3892 | Pyrite                    | 4.078517 |
| 45.833 | 2.48597        | 25.9   | 183.8 | 0.5413 | -                         |          |
| 47.385 | 2.40905        | 14.5   | 102.7 | 0.388  | -                         |          |
| 48.137 | 2.37361        | 17.5   | 39.6  | 0.2346 | Pyrite                    |          |
| 48.872 | 2.34004        | 13.4   | 30.3  | 0.2936 | Aragonite                 |          |
| 50.25  | 2.27988        | 30     | 142.2 | 0.3527 | Feldspar                  |          |
| 52.286 | 2.19697        | 13.2   | 73.1  | 0.4874 | Dolomite                  |          |
| 55.017 | 2.09584        | 15.1   | 95.9  | 0.4776 | -                         |          |
| Total  |                | 458.5  |       |        |                           |          |

Table S6-8 X ray diffraction data of core 6 sample no.8

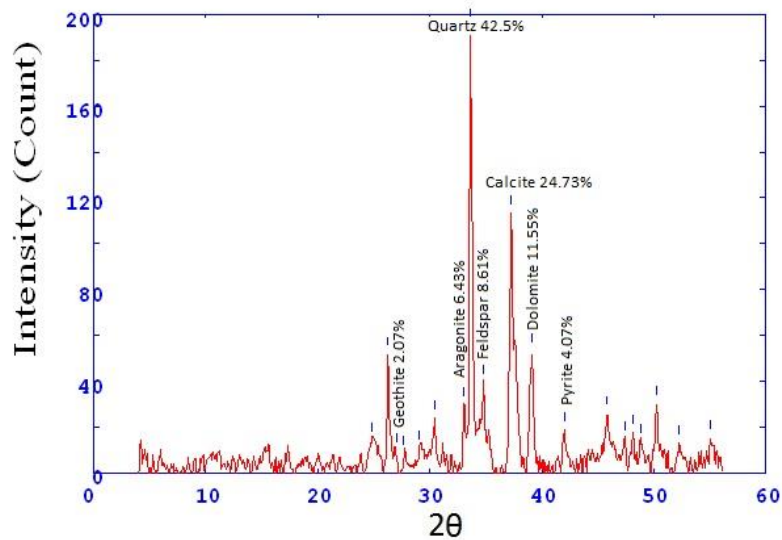

Fig.S9-8 X ray diffractogram of core 6 sample no.8

| 2Theta | d (A)          | Height | Area  | FWHM   | Identified mineral       | WT%      |
|--------|----------------|--------|-------|--------|--------------------------|----------|
| 24.559 | 4.55157        | 6      | 112.1 | 0.3974 | -                        | 0        |
| 26.334 | 4.24955        | 21.7   | 112.1 | 0.3974 | -                        |          |
| 29.4   | 3.81471        | 16.2   | 102.6 | 0.4458 | -                        |          |
| 31.134 | 3.60715        | 10.8   | 31.9  | 0.1871 | -                        |          |
| 33.062 | <b>3.40212</b> | 75     | 221.6 | 0.2165 | Aragonite                | 20.20474 |
| 33.685 | <b>3.34095</b> | 106    | 305.3 | 0.2459 | Quartz                   | 28.55603 |
| 34.511 | <b>3.26331</b> | 44.3   | 127.5 | 0.4975 | feldspar<br>(orthoclase) | 11.93427 |
| 37.748 | <b>2.99241</b> | 94.1   | 993   | 0.7491 | Calcite                  | 25.35022 |
| 38.956 | <b>2.90306</b> | 9.9    | 104.8 | 0.5577 | dolomite                 | 2.667026 |
| 41.992 | <b>2.70168</b> | 41.9   | 226.9 | 0.3664 | Pyrite                   | 11.28772 |
| 45.886 | 2.48326        | 37.7   | 250.3 | 0.4643 | -                        |          |
| 48.195 | 2.3709         | 32.3   | 196.8 | 0.4277 | Aragonite                |          |
| 48.909 | 2.33837        | 28.4   | 173   | 0.6485 | feldspar                 |          |
| 50.341 | 2.27603        | 26.1   | 310.1 | 0.8694 | feldspar                 |          |
| 50.842 | 2.25507        | 18.8   | 224.1 | 1.0566 | Pyrite                   |          |
| 52.7   | 2.18095        | 9.1    | 185.8 | 1.2438 | dolomite                 |          |
| 54.817 | 2.10289        | 20.1   | 100.5 | 0.3489 | -                        |          |
| 55.963 | 2.06319        | 15.9   | 79.6  | 0.4656 | -                        |          |
| Total  |                | 371.2  |       |        |                          |          |

Table S6-9 X ray diffraction data of core 6 sample no.9

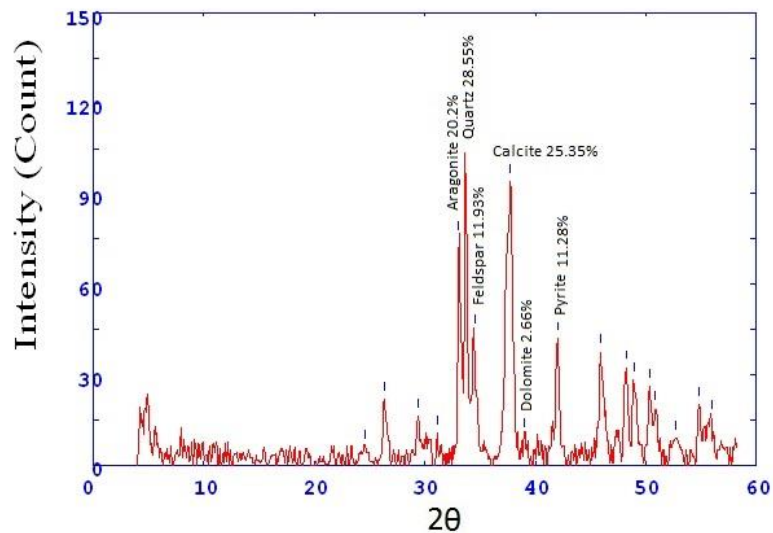

Fig.S9-9 X ray diffractogram of core 6 sample no.9

| 2Theta | d (A)          | Height | Area   | FWHM   | Identified mineral        | WT%      |
|--------|----------------|--------|--------|--------|---------------------------|----------|
| 26.275 | <b>4.25894</b> | 16.1   | 74.2   | 0.3697 | Goethite                  | 4.054394 |
| 29.941 | 3.74735        | 16.4   | 61.8   | 0.3381 | -                         |          |
| 33.133 | <b>3.39502</b> | 95     | 282.5  | 0.2805 | Aragonite                 | 23.92344 |
| 33.67  | <b>3.34239</b> | 51.9   | 154.3  | 0.4981 | Quartz                    | 13.06976 |
| 34.373 | <b>3.27606</b> | 47     | 139.6  | 0.607  | feldspar<br>(orthoclase ) | 11.83581 |
| 37.71  | <b>2.99538</b> | 103.6  | 1005.2 | 0.7158 | Calcite                   | 26.08915 |
| 39.029 | <b>2.89789</b> | 8.9    | 86.3   | 0.5725 | dolomite                  | 2.241249 |
| 40.215 | <b>2.8158</b>  | 29.7   | 167.3  | 0.4291 | halite                    | 7.479224 |
| 42.05  | <b>2.69811</b> | 44.9   | 221.2  | 0.3484 | Pyrite                    | 11.30698 |
| 45.913 | 2.48188        | 40.2   | 291.7  | 0.55   | -                         |          |
| 47.374 | 2.40957        | 13.5   | 97.8   | 0.4694 | Aragonite                 |          |
| 48.167 | 2.37222        | 35.5   | 178.8  | 0.3889 | Aragonite                 |          |
| 49.043 | 2.33238        | 25.6   | 129.1  | 0.5595 | feldspar                  |          |
| 50.875 | 2.25369        | 17.1   | 173.9  | 0.7302 | feldspar                  |          |
| 52.614 | 2.18424        | 14.2   | 69.1   | 0.4222 | dolomite                  |          |
| Total  |                | 397.1  |        |        |                           |          |

Table S6-10 X ray diffraction data of core 6 sample no.10

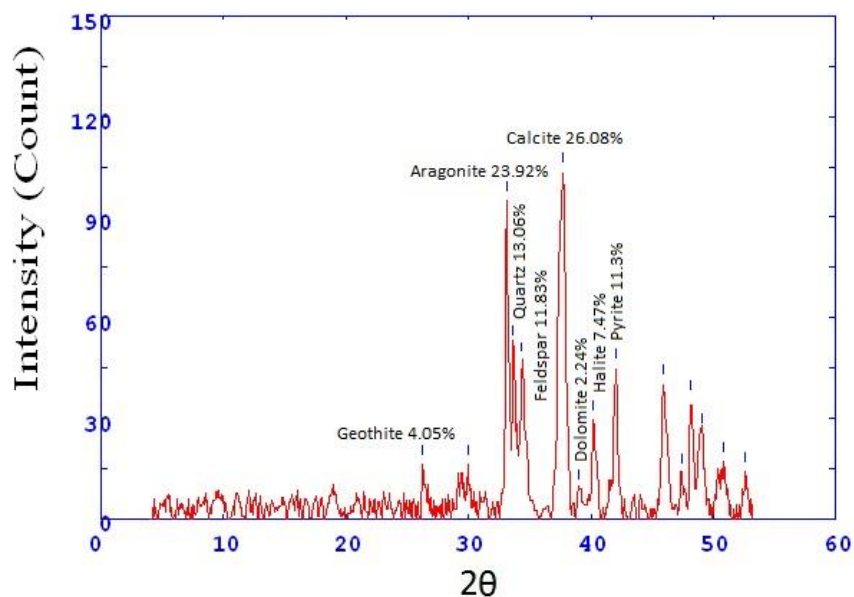

Fig.S9-10 X ray diffractogram of core 6 sample no.10

| 2Theta | d (A)   | Height | Area   | FWHM   | Identified mineral    | WT%      |
|--------|---------|--------|--------|--------|-----------------------|----------|
| 13.112 | 8.47866 | 73.7   | 1762.9 | 0.3861 | Illite                | 9.512132 |
| 14.502 | 7.66945 | 317.4  | 1762.9 | 0.3861 | Gypsum                | 40.96541 |
| 26.143 | 4.28013 | 48.8   | 294    | 0.464  | Gypsum                |          |
| 29.396 | 3.81529 | 150.4  | 427.2  | 0.2441 | Gypsum                | 0        |
| 30.305 | 3.70336 | 21.3   | 60.4   | 0.2477 | -                     |          |
| 33.542 | 3.35483 | 194.7  | 559    | 0.2514 | quartz                | 25.12907 |
| 34.501 | 3.26431 | 28.3   | 81.3   | 0.2846 | feldspar (orthoclase) | 3.652555 |
| 35.282 | 3.19423 | 31.8   | 106.4  | 0.3179 | feldspar (Albite)     | 4.104285 |
| 36.639 | 3.07974 | 48.5   | 162.3  | 0.3779 | gypsum                |          |
| 37.177 | 3.03674 | 77.2   | 454.9  | 0.4379 | calcite               | 9.963862 |
| 39.272 | 2.88065 | 28.3   | 166.8  | 0.3553 | dolomite              | 3.652555 |
| 40.044 | 2.82732 | 76.4   | 236.7  | 0.2727 | Feldspar (orthoclase) |          |
| 42.192 | 2.68945 | 23.4   | 80.1   | 0.3076 | Pyrite                | 3.020134 |
| 45.648 | 2.49552 | 18.3   | 136.3  | 0.5556 | Gypsum                |          |
| Total  |         | 774.8  |        |        |                       |          |

Table S7-1 X ray diffraction data of core 7 sample no.1

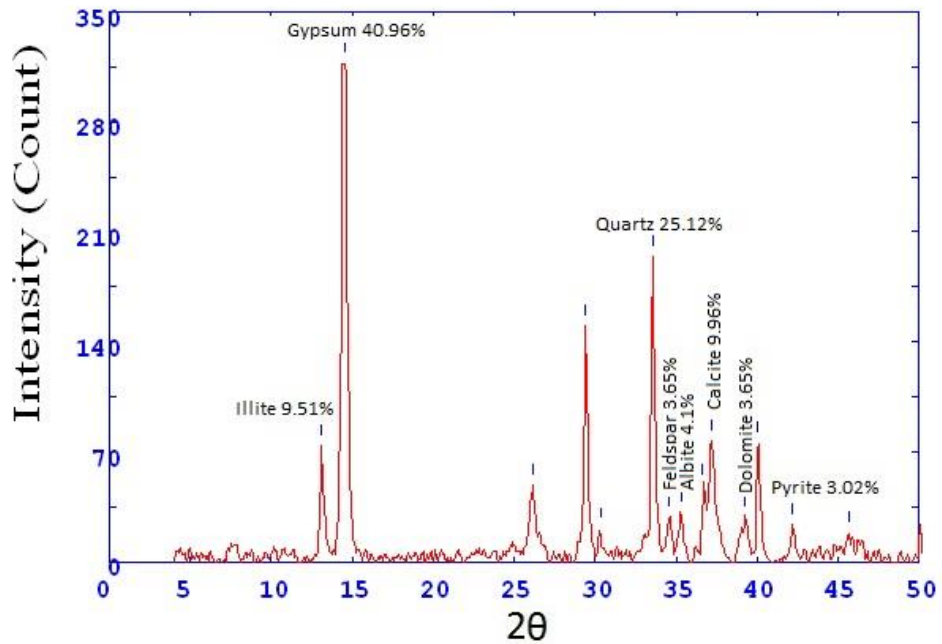

Fig.S10-1 X ray diffractogram of core 7 sample no.1

| 2Theta | d (Å)          | Height | Area  | FWHM   | Identified mineral       | WT%      |
|--------|----------------|--------|-------|--------|--------------------------|----------|
| 24.849 | 4.49927        | 21.8   | 184.7 | 0.6198 | -                        | 0        |
| 26.226 | <b>4.26673</b> | 27.3   | 138.1 | 0.4165 | Goethite                 | 9.030764 |
| 30.233 | 3.71195        | 22.5   | 99.1  | 0.3589 | -                        |          |
| 33.602 | <b>3.34898</b> | 89.1   | 273.1 | 0.2922 | quartz                   | 29.47403 |
| 34.706 | <b>3.24561</b> | 19     | 58.3  | 0.3164 | feldspar<br>(orthoclase) | 6.285147 |
| 35.257 | <b>3.19644</b> | 22.7   | 99.6  | 0.3406 | Albite                   | 7.509097 |
| 37.226 | <b>3.03288</b> | 76.4   | 382.1 | 0.4324 | Calcite                  | 25.27291 |
| 39.124 | <b>2.89107</b> | 52.5   | 269.4 | 0.4307 | Dolomite                 | 17.36685 |
| 40.153 | <b>2.81996</b> | 15.3   | 78.7  | 0.9224 | Halite                   | 5.061197 |
| 44.247 | 2.57041        | 17.4   | 325.7 | 1.4141 | quartz                   |          |
| 45.833 | 2.48598        | 17.3   | 280.9 | 1.1115 | -                        |          |
| 47.167 | 2.41955        | 16.8   | 110   | 0.5568 | quartz                   |          |
| 50.233 | 2.28058        | 17     | 110.6 | 0.4706 | Albite                   |          |
| Total  |                | 302.3  |       |        |                          |          |

Table S7-2 X ray diffraction data of core 7 sample no.2

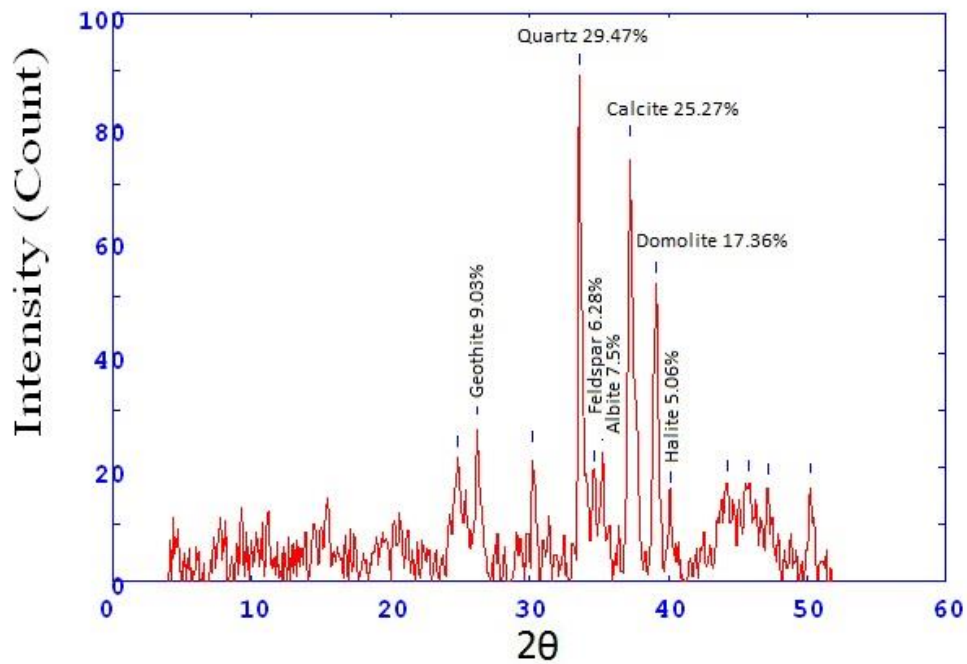

Fig.S10-2 X ray diffractogram of core 7 sample no.2



| 2Theta | d (A)          | Height | Area  | FWHM   | Identified mineral       | WT%      |
|--------|----------------|--------|-------|--------|--------------------------|----------|
| 26.211 | 4.26922        | 21.2   | 86.8  | 0.3373 | -                        |          |
| 30.358 | 3.69709        | 20.2   | 112.2 | 0.466  | -                        |          |
| 33.559 | <b>3.35316</b> | 129.6  | 383   | 0.2839 | quartz                   | 30.38687 |
| 34.538 | <b>3.26091</b> | 43.7   | 129.1 | 0.2816 | feldspar<br>(orthoclase) | 10.24619 |
| 35.211 | <b>3.20046</b> | 66     | 205.8 | 0.2793 | Albite                   | 15.47479 |
| 37.214 | <b>3.03384</b> | 105.3  | 423.6 | 0.3448 | calcite                  | 24.68933 |
| 39.052 | <b>2.89625</b> | 52.3   | 377.6 | 0.5451 | dolomite                 | 12.2626  |
| 40.155 | <b>2.81984</b> | 12.8   | 92.8  | 0.3879 | Halite                   | 3.001172 |
| 41.942 | <b>2.70479</b> | 16.8   | 43.7  | 0.2308 | Pyrite                   | 3.939039 |
| 45.767 | 2.4894         | 19.9   | 186.1 | 0.6276 | Gypsum                   |          |
| 48.701 | 2.34777        | 11.4   | 97.9  | 0.4474 | feldspar                 |          |
| 50.18  | 2.28283        | 23.9   | 116.2 | 0.348  | Albite                   | 0        |
| 52.284 | 2.19706        | 14.1   | 138.5 | 0.63   | Gypsum                   |          |
| 54.055 | 2.13026        | 11.6   | 114.6 | 0.6233 | quartz                   |          |
| 55.033 | 2.09525        | 17.7   | 141.7 | 0.6166 | -                        |          |
| Total  |                | 426.5  |       |        |                          |          |

Table S7-3 X ray diffraction data of core 7 sample no.3

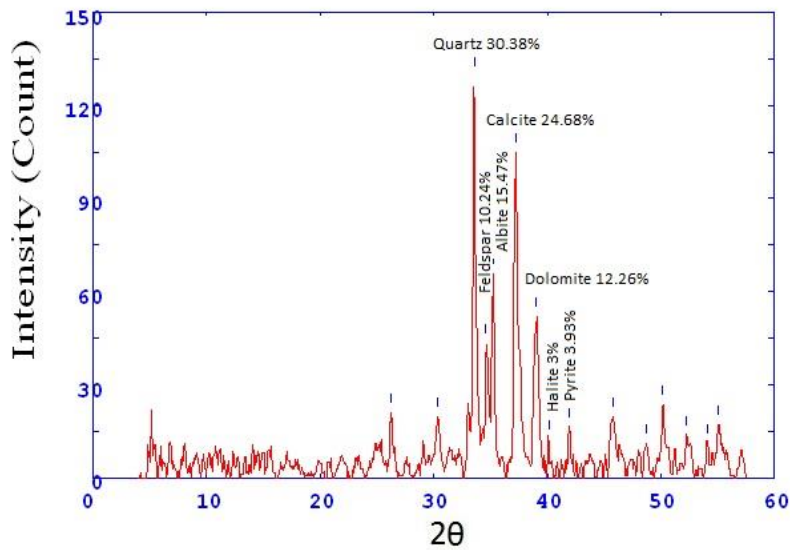

Fig.S10-3 X ray diffractogram of core 7 sample no.3

| 2Theta | d (A)          | Height | Area  | FWHM   | Identified mineral    | WT%      |
|--------|----------------|--------|-------|--------|-----------------------|----------|
| 26.19  | 4.27256        | 43     | 100.2 | 0.2372 | -                     | 0        |
| 29.066 | <b>3.85759</b> | 18.7   | 74.9  | 0.3563 | anhydrite             | 4.066101 |
| 30.531 | 3.67656        | 13.5   | 54.1  | 0.3132 | -                     |          |
| 33.012 | <b>3.40712</b> | 22.9   | 91.4  | 0.2916 | Aragonite             | 4.979343 |
| 33.588 | <b>3.35034</b> | 163.9  | 483.2 | 0.27   | quartz                | 35.63818 |
| 34.666 | <b>3.24921</b> | 18.2   | 53.7  | 0.2884 | feldspar (orthoclase) | 3.957382 |
| 35.217 | <b>3.19992</b> | 16.7   | 49.1  | 0.3068 | Albite                | 3.631224 |
| 37.228 | <b>3.03275</b> | 152.5  | 616.2 | 0.3436 | calcite               | 33.15938 |
| 38.934 | <b>2.9047</b>  | 35.1   | 226.1 | 0.4846 | dolomite              | 7.632094 |
| 40.087 | <b>2.82442</b> | 13     | 83.8  | 0.4283 | Halite                | 2.826701 |
| 41.934 | <b>2.70527</b> | 18.9   | 92.2  | 0.372  | Magnesite, pyrite     | 4.109589 |
| 44.073 | 2.58003        | 10.7   | 213.9 | 1.4543 | feldspar (orthoclase) |          |
| 45.797 | 2.48785        | 30.3   | 173.4 | 0.4234 | Gypsum                |          |
| 47.989 | 2.3805         | 10.9   | 62.6  | 0.5535 | Pyrite                |          |
| 48.768 | 2.34474        | 11.5   | 112.4 | 0.6835 | anhydrite             |          |
| 50.189 | 2.28246        | 30.9   | 164   | 0.4027 | feldspar (orthoclase) |          |
| 52.123 | 2.20336        | 12     | 63.6  | 0.3112 | Pyrite                |          |
| 53.148 | 2.16389        | 17.6   | 39.7  | 0.2197 | -                     |          |
| 55.15  | 2.09117        | 25.7   | 125.4 | 0.4349 | -                     |          |
| Total  |                | 459.9  |       |        |                       |          |

Table S7-4 X ray diffraction data of core 7 sample no.4

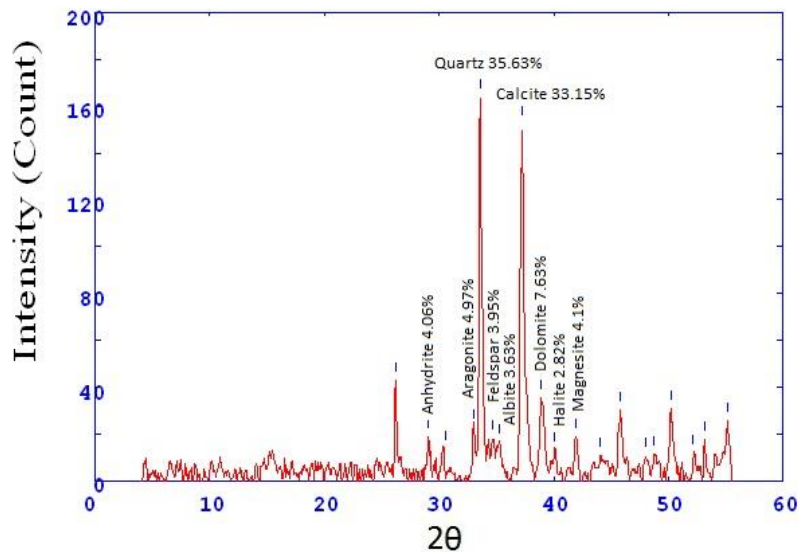

Fig.S10-4 X ray diffractogram of core 7 sample no.4

| 2Theta | d (A)          | Height | Area  | FWHM   | Identified mineral    | WT%      |
|--------|----------------|--------|-------|--------|-----------------------|----------|
| 22.3   | <b>5.00587</b> | 7      | 26.5  | 0.3264 | Gypsum                | 1.247772 |
| 23.5   | 4.75346        | 8.3    | 26.5  | 0.3264 | Gypsum                |          |
| 26.252 | 4.26261        | 13.6   | 36.2  | 0.2612 | Gypsum                | 0        |
| 29.074 | 3.85651        | 18.8   | 75.9  | 0.3596 | -                     |          |
| 32.87  | <b>3.42148</b> | 47.2   | 190.8 | 0.3705 | Aragonite             | 8.413547 |
| 33.537 | <b>3.35533</b> | 52.5   | 215.7 | 0.3814 | quartz                | 9.358289 |
| 34.279 | <b>3.28478</b> | 29.5   | 121.2 | 0.4109 | feldspar (orthoclase) | 5.258467 |
| 37.215 | <b>3.03372</b> | 169.5  | 954.8 | 0.4405 | calcite               | 30.2139  |
| 38.947 | <b>2.90371</b> | 13.4   | 75.7  | 0.3464 | dolomite              | 2.388592 |
| 40.044 | <b>2.82733</b> | 42.7   | 125.2 | 0.2523 | Halite                | 7.611408 |
| 41.87  | <b>2.70918</b> | 29.7   | 114.9 | 0.3483 | Magnesite, pyrite     | 5.294118 |
| 45.733 | 2.49113        | 41.4   | 266   | 0.466  | Aragonite             |          |
| 47.139 | 2.4209         | 12.4   | 79.5  | 0.4454 | Gypsum                |          |
| 48.033 | 2.37842        | 18.6   | 100.1 | 0.4247 | Pyrite                |          |
| 48.812 | 2.34272        | 15.1   | 81.2  | 0.4447 | Gypsum                |          |
| 50.233 | 2.28058        | 29.5   | 190.8 | 0.4646 | Gypsum                |          |
| 52.2   | 2.20035        | 13.1   | 64.9  | 0.3585 | Gypsum                |          |
| Total  |                | 561    |       |        |                       |          |

Table S7-5 X ray diffraction data of core 7 sample no.5

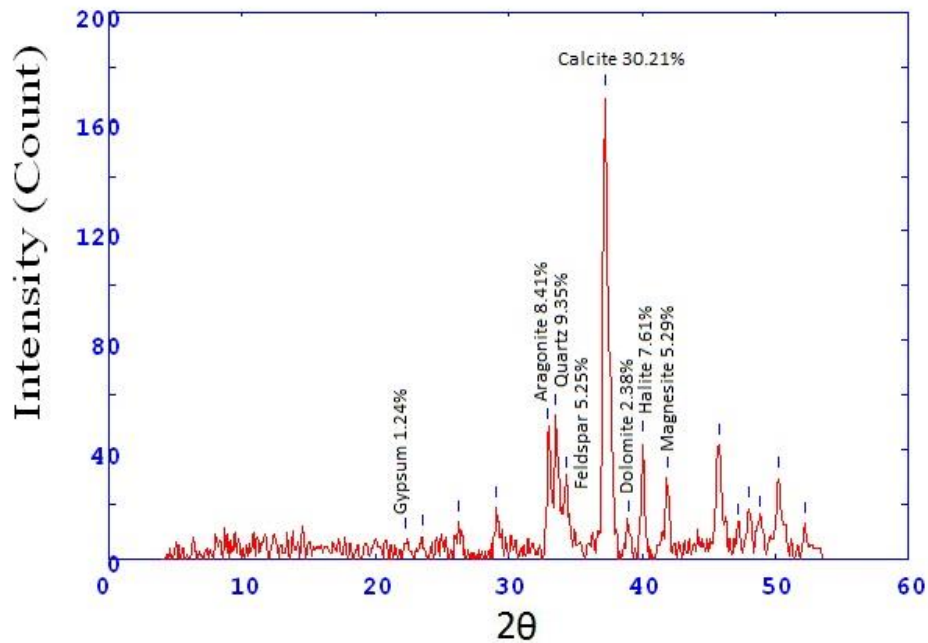

Fig.S10-5 X ray diffractogram of core 7 sample no.5

| 2Theta | d (A)          | Height | Area  | FWHM   | Identified mineral | WT%      |
|--------|----------------|--------|-------|--------|--------------------|----------|
| 14.494 | <b>7.67379</b> | 35.5   | 78.4  | 0.2263 | Gypsum             | 7.011653 |
| 26.211 | 4.26919        | 44.8   | 129   | 0.2502 | Gypsum             |          |
| 29.411 | 3.81333        | 20.1   | 139.2 | 0.5133 | -                  | 0        |
| 30.313 | 3.70237        | 19.8   | 137.1 | 0.3936 | -                  |          |
| 32.98  | <b>3.41035</b> | 25.6   | 176.8 | 0.3337 | Aragonite          | 5.056291 |
| 33.564 | <b>3.35263</b> | 209.8  | 624.4 | 0.2738 | quartz             | 41.43788 |
| 35.263 | <b>3.19591</b> | 31.8   | 137.1 | 0.3543 | Albite             | 6.280861 |
| 37.211 | <b>3.03405</b> | 123.7  | 507.9 | 0.3458 | calcite            | 24.43215 |
| 39.067 | <b>2.89517</b> | 66.7   | 399   | 0.4656 | Gypsum             | 13.17401 |
| 42.046 | <b>2.69835</b> | 13.2   | 86.8  | 0.4398 | pyrite             | 2.60715  |
| 45.833 | 2.48598        | 23     | 154.3 | 0.4812 | Gypsum             |          |
| 46.23  | 2.4658         | 19.8   | 132.8 | 0.4604 | calcite            |          |
| 47.98  | 2.3809         | 8.3    | 55.9  | 0.4396 | Gypsum             |          |
| 48.813 | 2.34268        | 10.3   | 68.7  | 0.398  | anhydrite          |          |
| 50.197 | 2.28212        | 36.7   | 148.7 | 0.3149 | calcite            |          |
| Total  |                | 506.3  |       |        |                    |          |

Table S7-6 X ray diffraction data of core 7 sample no.6

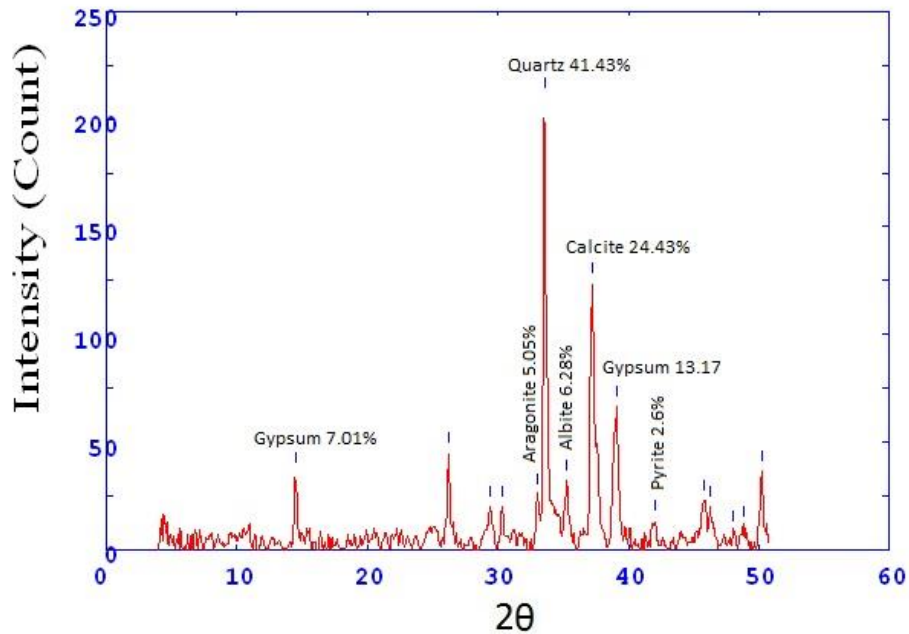

Fig.S10-6 X ray diffractogram of core 7 sample no.6

| 2Theta | d (A)          | Height | Area  | FWHM   | Identified mineral | WT%      |
|--------|----------------|--------|-------|--------|--------------------|----------|
| 29.354 | 3.82053        | 14.2   | 255.6 | 0.3246 | -                  |          |
| 33.086 | <b>3.39972</b> | 78.2   | 255.6 | 0.3246 | quartz             | 35.65891 |
| 34.215 | 3.29073        | 43.4   | 141.8 | 0.5045 | -                  |          |
| 37.351 | <b>3.02307</b> | 86.2   | 823.7 | 0.6844 | calcite            | 39.30689 |
| 39.24  | <b>2.88287</b> | 8.8    | 83.7  | 0.5892 | dolomite           | 4.012768 |
| 41.465 | 2.73449        | 15.3   | 146.3 | 0.494  | Magnesite, pyrite  |          |
| 41.933 | <b>2.7053</b>  | 46.1   | 151.6 | 0.3036 | Pyrite             | 21.02143 |
| 43.993 | 2.58447        | 6.7    | 14.5  | 0.1711 | quartz             |          |
| 45.878 | 2.4837         | 36.8   | 205.5 | 0.4227 | calcite            |          |
| 47.149 | 2.42039        | 14.5   | 80.9  | 0.3813 | Pyrite             |          |
| 48.127 | 2.37407        | 28.7   | 122.1 | 0.3399 | -                  |          |
| 48.879 | 2.33971        | 22.7   | 122.1 | 0.3399 | quartz             |          |
| Total  |                | 219.3  |       |        |                    |          |

Table S7-7 X ray diffraction data of core 7 sample no.7

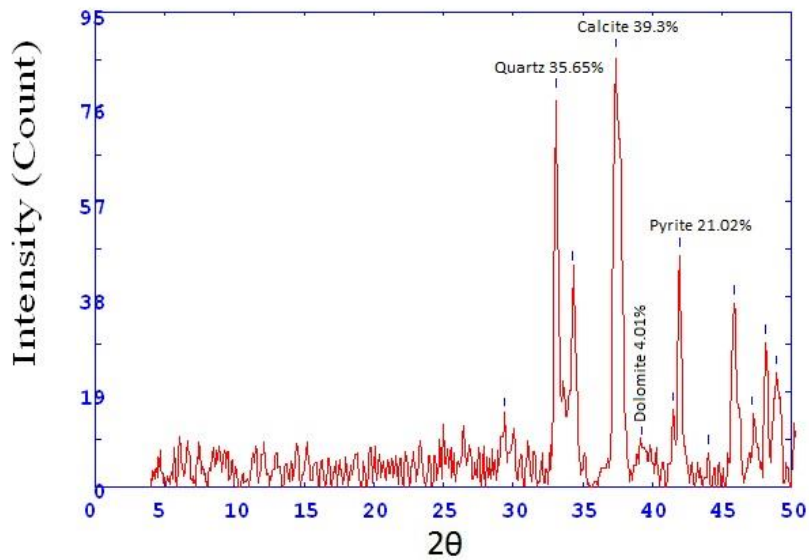

Fig.S10-7 X ray diffractogram of core 7 sample no.7

| 2Theta | d (A)          | Height | Area  | FWHM   | Identified mineral | WT%      |
|--------|----------------|--------|-------|--------|--------------------|----------|
| 29.167 | 3.84452        | 15.5   | 90.9  | 0.4459 | -                  |          |
| 29.886 | 3.75409        | 11.5   | 67.5  | 0.3822 | -                  | 0        |
| 33     | <b>3.40836</b> | 69.5   | 220.3 | 0.3185 | Aragonite          | 20.18588 |
| 34.176 | <b>3.29437</b> | 44.7   | 141.7 | 0.4485 | quartz             | 12.98286 |
| 35.166 | 3.20443        | 32.3   | 102.4 | 0.5135 | feldspar           | 9.381353 |
| 37.24  | <b>3.0318</b>  | 140.6  | 951   | 0.5785 | calcite            | 40.83648 |
| 39.992 | <b>2.83086</b> | 17.1   | 48.6  | 0.2254 | dolomite           | 4.966599 |
| 41.853 | <b>2.71026</b> | 40.1   | 180.7 | 0.3353 | Pyrite             | 11.64682 |
| 45.7   | 2.49284        | 39     | 224.3 | 0.4524 | Aragonite          |          |
| 47.211 | 2.41739        | 12     | 68.9  | 0.376  | Pyrite             |          |
| 48.025 | 2.3788         | 31.6   | 116.7 | 0.2995 | Pyrite             |          |
| 48.779 | 2.34423        | 27     | 99.9  | 0.2442 | -                  |          |
| Total  |                | 344.3  |       |        |                    |          |

Table S7-8 X ray diffraction data of core 7 sample no.8

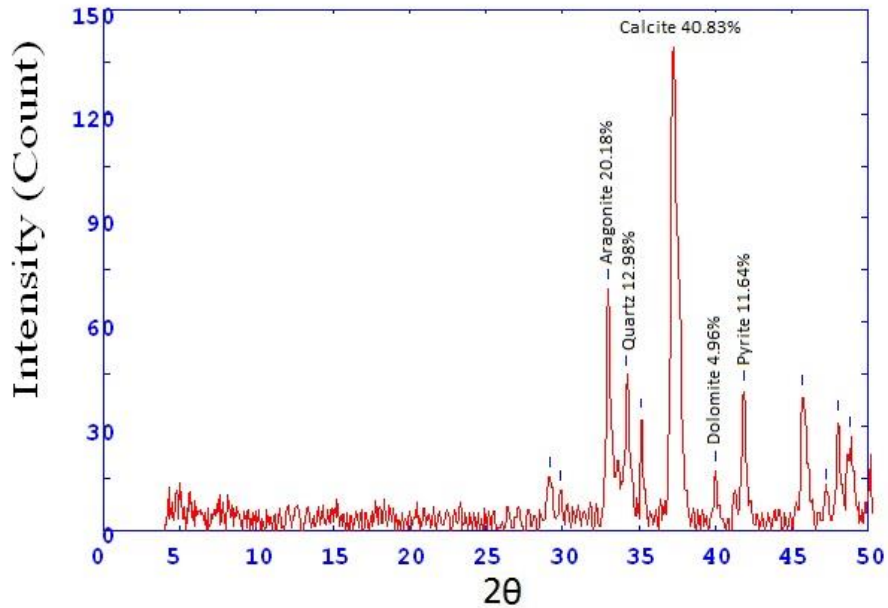

Fig.S10-8 X ray diffractogram of core 7 sample no.8

| 2Theta | d (Å)          | Height | Area   | FWHM   | Identified mineral | WT%         |
|--------|----------------|--------|--------|--------|--------------------|-------------|
| 13.117 | <b>8.47535</b> | 84.3   | 1835.8 | 0.4044 | Illite             | 14.85462555 |
| 14.5   | <b>7.67041</b> | 324.9  | 1835.8 | 0.4044 | Gypsum             | 57.25110132 |
| 25.98  | 4.30649        | 65.1   | 250.2  | 0.3347 | Gypsum             |             |
| 26.58  | <b>4.21097</b> | 18.8   | 72.4   | 0.293  | Geothite           | 3.31277533  |
| 29.386 | 3.81648        | 161.1  | 352.3  | 0.2513 | gypsum             |             |
| 33.513 | <b>3.35759</b> | 28.3   | 120.8  | 0.3605 | Quartz             | 4.986784141 |
| 36.678 | 3.07661        | 68     | 217    | 0.3095 | Gypsum             |             |
| 37.132 | <b>3.04027</b> | 39.8   | 126.8  | 0.3925 | calcite            | 7.013215859 |
| 39.233 | <b>2.88337</b> | 44.2   | 273.4  | 0.4755 | dolomite           | 7.788546256 |
| 42.118 | <b>2.69398</b> | 27.2   | 134.6  | 0.4495 | Pyrite             | 4.792951542 |
| 45.5   | 2.50321        | 31.9   | 178.7  | 0.4444 | Gypsum             |             |
| 50.167 | 2.28341        | 16.6   | 87.4   | 0.4167 | Quartz             |             |
| Total  |                | 567.5  |        |        |                    |             |

Table S8-1 X ray diffraction data of core 8 sample no.1

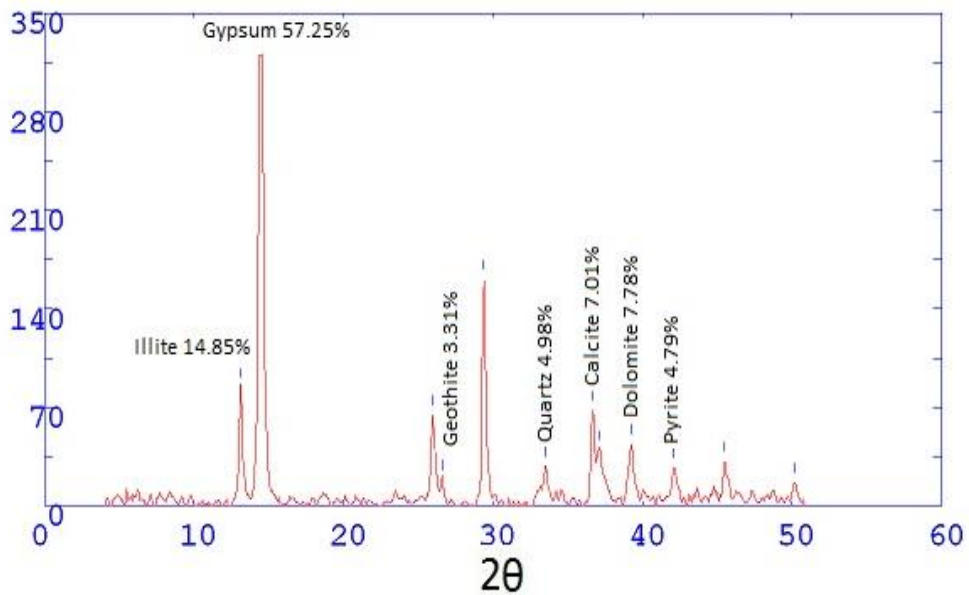

Fig.S11-1 X ray diffractogram of core 8 sample no.1

| 2Theta | d (Å)          | Height | Area   | FWHM   | Identified mineral       | WT%         |
|--------|----------------|--------|--------|--------|--------------------------|-------------|
| 14.441 | <b>7.70171</b> | 11.6   | 68     | 0.5052 | Gypsum                   | 2.192816635 |
| 24.819 | 4.50464        | 10     | 705.3  | 0.4653 | -                        |             |
| 26.074 | 4.29126        | 64.5   | 1883.2 | 0.4253 | Gypsum                   |             |
| 29.087 | 3.85492        | 7.5    | 46.7   | 0.3822 | Gypsum                   |             |
| 30.175 | 3.71898        | 37.2   | 295.9  | 0.3391 | dolomite                 |             |
| 32.936 | <b>3.41473</b> | 26.5   | 111.1  | 0.2842 | Aragonite                | 5.009451796 |
| 33.439 | <b>3.36488</b> | 285.7  | 577.9  | 0.2293 | Quartz                   | 54.00756144 |
| 34.527 | <b>3.26193</b> | 20.7   | 55.1   | 0.2503 | feldspar<br>(orthoclase) | 3.913043478 |
| 35.28  | <b>3.19443</b> | 19.1   | 734.7  | 0.2713 | feldspar (Albite )       | 3.610586011 |
| 37.205 | <b>3.03457</b> | 101.6  | 61.5   | 0.2767 | calcite                  | 19.20604915 |
| 39.046 | <b>2.89667</b> | 33.1   | 118.9  | 0.282  | dolomite                 | 6.257088847 |
| 39.966 | <b>2.83258</b> | 10     | 128.1  | 0.3255 | halite                   | 1.890359168 |
| 41.975 | <b>2.70273</b> | 20.7   | 490.7  | 0.369  | Pyrite                   | 3.913043478 |
| 44.569 | 2.55274        | 15.8   | 338    | 0.5075 | gypsum                   |             |
| 45.574 | 2.49939        | 18.2   | 119    | 0.486  | calcite                  |             |
| 46.159 | 2.46937        | 26.5   | 59.2   | 0.4881 | Aragonite                |             |
| 47.917 | 2.38385        | 10     | 118    | 0.4902 | Aragonite                |             |
| 48.586 | 2.35295        | 11.6   | 146    | 0.4944 | Aragonite                |             |
| 50.093 | 2.28656        | 30.6   | 123.9  | 0.2665 | calcite                  |             |
| Total  |                | 529    |        |        |                          |             |

Table S8-2 X ray diffraction data of core 8 sample no.2

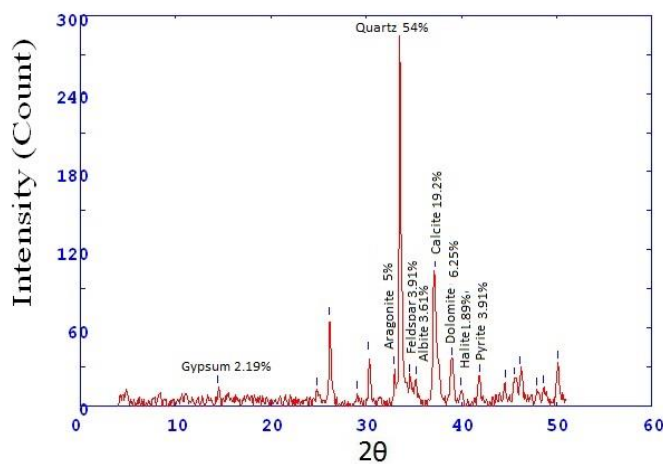

Fig.S11-2 X ray diffractogram of core 8 sample no.2



| 2Theta | d (A)          | Height | Area   | FWHM   | Identified mineral       | WT%         |
|--------|----------------|--------|--------|--------|--------------------------|-------------|
| 26.214 | 4.26871        | 75.3   | 207.4  | 0.2619 | -                        |             |
| 30.375 | 3.69505        | 46.1   | 167.7  | 0.2963 | -                        |             |
| 32.986 | <b>3.40973</b> | 36.2   | 131.7  | 0.3068 | Aragonite                | 5.707978556 |
| 33.567 | <b>3.35241</b> | 356.8  | 1218.4 | 0.3174 | Quartz                   | 56.25985494 |
| 34.711 | <b>3.24515</b> | 75.9   | 259.1  | 0.3729 | feldspar<br>(orthoclase) | 11.96783349 |
| 37.247 | <b>3.03122</b> | 106.1  | 520.8  | 0.4283 | calcite                  | 16.72973825 |
| 39.084 | <b>2.89395</b> | 37.8   | 292    | 0.534  | dolomite                 | 5.960264901 |
| 41.9   | <b>2.70735</b> | 21.4   | 115.1  | 0.4    | Pyrite                   | 3.374329864 |
| 46.327 | 2.46093        | 23     | 59     | 0.2442 | Aragonite                |             |
| 48.047 | 2.37778        | 18.5   | 70.6   | 0.3313 | Aragonite                |             |
| 50.145 | 2.28435        | 30.3   | 122.9  | 0.3517 | feldspar (orthoclase)    |             |
| 54.1   | 2.12861        | 22.2   | 127.3  | 0.374  | Aragonite                |             |
| Total  |                | 634.2  |        |        |                          |             |

Table S8-3 X ray diffraction data of core 8 sample no.3

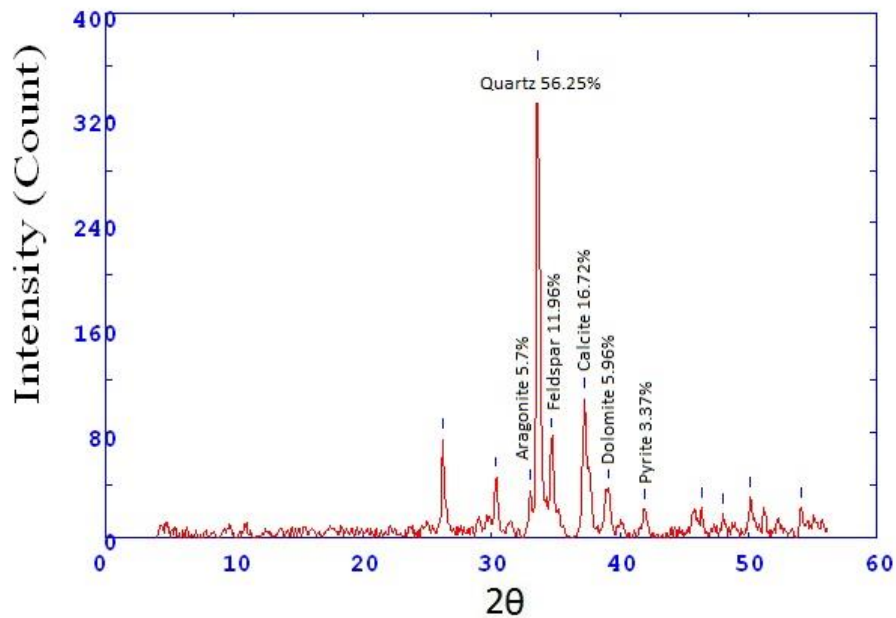

Fig.S11-3 X ray diffractogram of core 8 sample no.3

| 2Theta | d (A)          | Height | Area   | FWHM   | Identified mineral    | WT%         |
|--------|----------------|--------|--------|--------|-----------------------|-------------|
| 13.125 | <b>8.4702</b>  | 313.7  | 1342.7 | 0.4503 | Illite                | 28.72447578 |
| 14.634 | <b>7.60047</b> | 314.4  | 2621.8 | 0.5505 | Gypsum                | 28.78857248 |
| 17.307 | 6.4337         | 12.6   | 42.9   | 0.2941 | -                     |             |
| 23.67  | 4.7199         | 10.7   | 36.4   | 0.2668 | -                     |             |
| 26.141 | 4.28037        | 67.9   | 231.1  | 0.2532 | Gypsum                |             |
| 26.675 | <b>4.19622</b> | 67.9   | 175.6  | 0.2395 | Geothite              | 6.217379361 |
| 29.437 | 3.81008        | 329.6  | 852.6  | 0.2489 | Gypsum                |             |
| 33.604 | <b>3.34877</b> | 71     | 200.7  | 0.2583 | Quartz                | 6.501236151 |
| 34.545 | <b>3.26028</b> | 13.9   | 39.2   | 0.2744 | feldspar (orthoclase) | 1.272777218 |
| 36.851 | 3.06264        | 71.1   | 201    | 0.2824 | Gypsum                |             |
| 37.202 | <b>3.03474</b> | 126.5  | 382.3  | 0.2904 | calcite               | 11.58318835 |
| 39.347 | <b>2.87539</b> | 115.2  | 350.3  | 0.286  | dolomite              | 10.54848457 |
| 40.147 | <b>2.82039</b> | 31.9   | 96.9   | 0.289  | halite                | 2.920977932 |
| 42.272 | <b>2.68459</b> | 37.6   | 116.7  | 0.292  | Pyrite                | 3.442908159 |
| 44.917 | 2.53401        | 41.7   | 125.4  | 0.2511 | Gypsum                |             |
| 45.666 | 2.49458        | 10.7   | 32.1   | 0.2588 | Gypsum                |             |
| 46.387 | 2.45791        | 41.5   | 123.9  | 0.2665 | feldspar (orthoclase) |             |
| Total  |                | 1092.1 |        |        |                       |             |

Table S8-4 X ray diffraction data of core 8 sample no.4

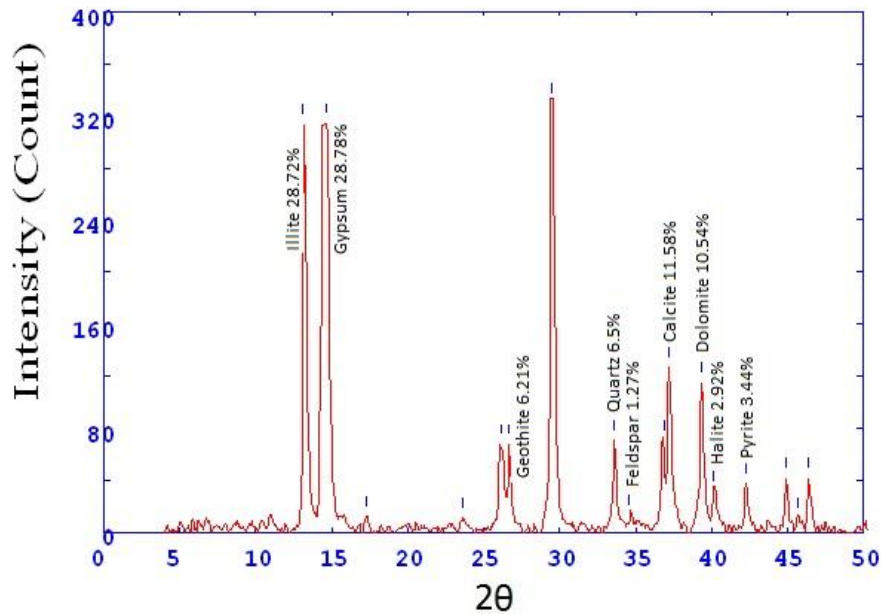

Fig.S11-4 X ray diffractogram of core 8 sample no.4

| 2Theta | d (A)          | Height | Area   | FWHM   | Identified mineral    | WT%         |
|--------|----------------|--------|--------|--------|-----------------------|-------------|
| 11.214 | <b>9.908</b>   | 11.7   | 68     | 0.5052 | Illite                | 1.452153407 |
| 13.199 | 8.42294        | 121.2  | 705.3  | 0.4653 | Illite                |             |
| 14.633 | <b>7.60103</b> | 331.4  | 1883.2 | 0.4253 | Gypsum                | 41.13193496 |
| 17.389 | 6.40362        | 8.2    | 46.7   | 0.3822 | -                     |             |
| 26.197 | 4.27141        | 76.1   | 295.9  | 0.3391 | gypsum                |             |
| 26.692 | <b>4.19365</b> | 28.6   | 111.1  | 0.2842 | Geothite              | 3.549708328 |
| 29.464 | 3.80659        | 288.8  | 577.9  | 0.2293 | gypsum                |             |
| 30.379 | 3.6945         | 27.6   | 55.1   | 0.2503 | -                     |             |
| 33.611 | <b>3.34811</b> | 256.3  | 734.7  | 0.2713 | Quartz                | 31.81084771 |
| 34.821 | <b>3.23517</b> | 21.5   | 61.5   | 0.2767 | feldspar (orthoclase) | 2.66848703  |
| 35.292 | <b>3.19333</b> | 41.6   | 118.9  | 0.282  | feldspar (Albite )    | 170.4918033 |
| 36.833 | <b>3.06413</b> | 44.9   | 128.1  | 0.3255 | calcite               | 5.572793844 |
| 37.241 | 3.03173        | 114.4  | 490.7  | 0.369  | Gypsum                |             |
| 39.309 | <b>2.87806</b> | 49.1   | 338    | 0.5075 | Dolomite              | 6.094079682 |
| 42.301 | <b>2.68282</b> | 20.6   | 119    | 0.486  | Pyrite                | 2.556782922 |
| 43.956 | 2.58653        | 10.3   | 59.2   | 0.4881 | Gypsum                |             |
| 44.794 | 2.54056        | 20.4   | 118    | 0.4902 | Gypsum                |             |
| 45.733 | 2.49112        | 22     | 146    | 0.4944 | Gypsum                |             |
| 50.233 | 2.28058        | 24.4   | 140    | 0.4323 | Quartz                |             |
| Total  |                | 805.6  |        |        |                       |             |

Table S8-5 X ray diffraction data of core 8 sample no.5

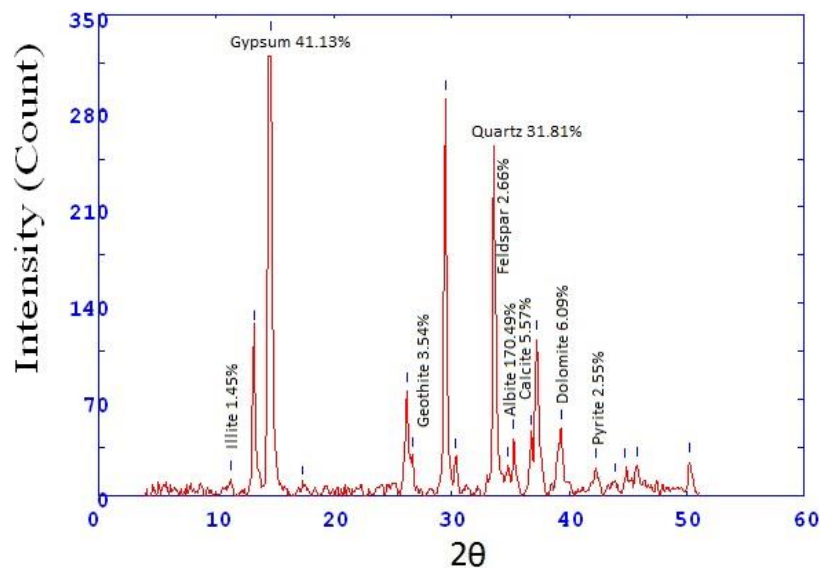

Fig.S11-5 X ray diffractogram of core 8 sample no.5

| 2Theta | d (A)          | Height | Area  | FWHM   | Identified mineral       | WT%         |
|--------|----------------|--------|-------|--------|--------------------------|-------------|
| 14.419 | <b>7.71334</b> | 11.1   | 75.4  | 0.4122 | Gypsum                   | 2.149496514 |
| 15.481 | 7.18731        | 9.8    | 66.4  | 0.3705 | -                        |             |
| 26.1   | 4.28703        | 12.1   | 76.6  | 0.3655 | Gypsum                   |             |
| 29.035 | 3.86166        | 14.3   | 91    | 0.2825 | -                        |             |
| 30.279 | 3.70645        | 22.2   | 42.9  | 0.1996 | -                        |             |
| 32.814 | <b>3.42716</b> | 56.6   | 109.3 | 0.2296 | Aragonite                | 10.96049574 |
| 33.507 | <b>3.35825</b> | 184.5  | 546.1 | 0.2596 | Quartz                   | 35.72811774 |
| 34.292 | <b>3.28354</b> | 32.6   | 96.6  | 0.4101 | -                        | 6.312935709 |
| 34.621 | <b>3.25332</b> | 27.5   | 81.4  | 0.4854 | feldspar<br>(orthoclase) | 5.325329202 |
| 34.949 | <b>3.22367</b> | 26.9   | 79.7  | 0.523  | feldspar (Albite )       | 5.209140201 |
| 37.156 | <b>3.03837</b> | 132.2  | 899.3 | 0.5606 | calcite                  | 25.60030984 |
| 38.975 | <b>2.90176</b> | 17.2   | 117   | 0.4565 | Dolomite                 | 3.330751356 |
| 39.632 | 2.85553        | 12.6   | 85.9  | 0.4044 | -                        |             |
| 41.811 | <b>2.71283</b> | 27.8   | 126.3 | 0.3523 | Pyrite                   | 5.383423703 |
| 43.85  | 2.5925         | 7.1    | 35.1  | 0.3333 | gypsum                   |             |
| 45.7   | 2.49284        | 31.4   | 194.5 | 0.4738 | gypsum                   |             |
| 46.203 | 2.46714        | 18.9   | 117.2 | 0.3613 | Aragonite                |             |
| 47.189 | 2.41846        | 8.1    | 49.9  | 0.3051 | Aragonite                |             |
| 47.995 | 2.38019        | 26     | 65.8  | 0.2489 | Pyrite                   |             |
| 48.668 | 2.34926        | 18.9   | 0     | 0      | Aragonite                |             |
| Total  |                | 516.4  |       |        |                          |             |

Table S8-6 X ray diffraction data of core 8 sample no.6

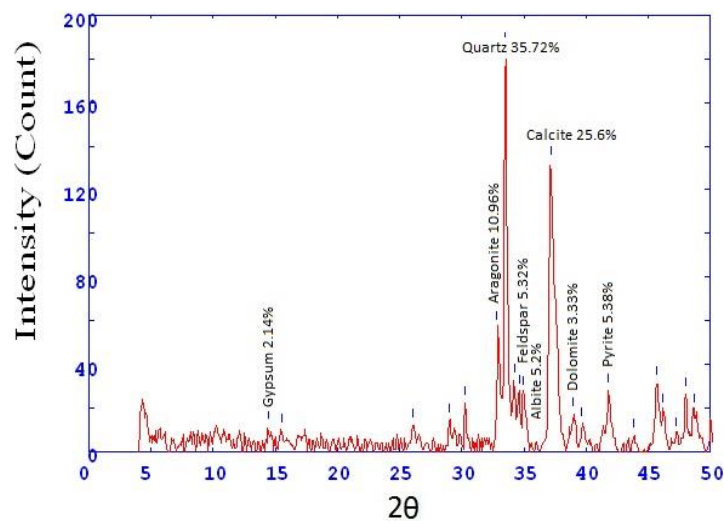

Fig.S11-6 X ray diffractogram of core 8 sample no.6

| 2Theta | d (A)          | Height | Area  | FWHM   | Identified mineral    | WT%         |
|--------|----------------|--------|-------|--------|-----------------------|-------------|
| 14.275 | <b>7.79104</b> | 10.5   | 92.4  | 0.5405 | Gypsum                | 2.975347124 |
| 15.601 | 7.13208        | 12.2   | 92.4  | 0.5405 | -                     |             |
| 16.979 | 6.55699        | 8.1    | 61.2  | 0.4369 | -                     |             |
| 26.233 | 4.26563        | 11.3   | 51.1  | 0.3194 | Gypsum                |             |
| 29.283 | 3.82962        | 15.1   | 101.3 | 0.5155 | gypsum                |             |
| 33.116 | <b>3.39669</b> | 61.8   | 248.2 | 0.2997 | Aragonite             | 17.51204307 |
| 33.732 | <b>3.3365</b>  | 54.2   | 217.5 | 0.48   | Quartz                | 15.35845849 |
| 34.43  | <b>3.27084</b> | 36.5   | 146.7 | 0.5701 | feldspar (orthoclase) | 10.34287334 |
| 37.328 | <b>3.02491</b> | 126.1  | 1122  | 0.6602 | calcite               | 35.73250213 |
| 39.141 | <b>2.88989</b> | 15.7   | 139.5 | 0.4568 | Dolomite              | 4.448852366 |
| 39.926 | <b>2.83531</b> | 8.9    | 78.8  | 0.3551 | halite                | 2.521960895 |
| 40.275 | 2.81175        | 9.3    | 82.4  | 0.3042 | -                     |             |
| 41.986 | <b>2.70208</b> | 39.2   | 109.8 | 0.2533 | Pyrite                | 11.1079626  |
| 43.504 | 2.61213        | 6.9    | 19.2  | 0.355  | Quartz                |             |
| 45.867 | 2.48427        | 41     | 231.4 | 0.4567 | Aragonite             |             |
| 47.343 | 2.41107        | 13.3   | 74.9  | 0.4543 | Gypsum                |             |
| 48.148 | 2.3731         | 27.2   | 148.8 | 0.4519 | Aragonite             |             |
| 49.088 | 2.33039        | 25.3   | 138.6 | 0.4926 | Aragonite             |             |
| 50.376 | 2.27453        | 28.4   | 176.9 | 0.5333 | gypsum                |             |
| 50.745 | 2.25906        | 19.3   | 119.9 | 0.4156 | Pyrite                |             |
| 52.567 | 2.18608        | 14.6   | 51.6  | 0.2978 | feldspar (orthoclase) |             |
| Total  |                | 352.9  |       |        |                       |             |

Table S8-7 X ray diffraction data of core 8 sample no.7

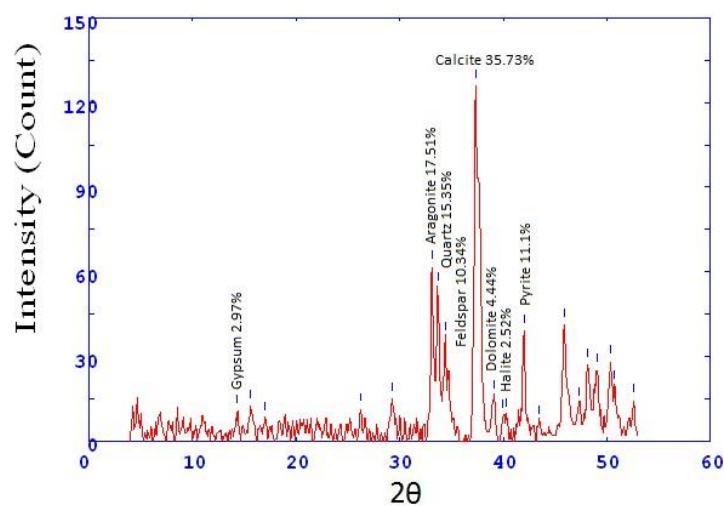

Fig.S11-7 X ray diffractogram of core 8 sample no.7

| 2Theta | d (A)          | Height | Area    | FWHM   | Identified mineral       | WT%         |
|--------|----------------|--------|---------|--------|--------------------------|-------------|
| 26.291 | 4.25642        | 80     | 11358.7 | 0      | -                        |             |
| 27.547 | 4.06589        | 54.2   | 7696.3  | 0      | -                        |             |
| 29.34  | 3.82237        | 62     | 12396   | 0      | -                        |             |
| 32.979 | <b>3.41045</b> | 111.8  | 22344.7 | 0.8627 | Aragonite                | 16.66169896 |
| 33.62  | <b>3.34728</b> | 132.5  | 2822.7  | 1.7254 | Quartz                   | 19.7466468  |
| 34.316 | <b>3.28133</b> | 78.8   | 1679.2  | 1.3619 | feldspar<br>(orthoclase) | 11.74366617 |
| 37.278 | <b>3.02882</b> | 142.2  | 2190.7  | 0.9983 | calcite                  | 21.19225037 |
| 39.08  | <b>2.89426</b> | 58.7   | 904.4   | 0.9983 | dolomite                 | 8.748137109 |
| 40.073 | <b>2.82533</b> | 62     | 12428   | 0.9983 | halite                   | 9.239940387 |
| 41.891 | <b>2.70789</b> | 85     | 12624   | 0.9983 | Pyrite                   | 12.66766021 |
| 45.858 | 2.48474        | 84.1   | 11516   | 0.9983 | Aragonite                |             |
| 48.189 | 2.37119        | 68.3   | 9353.5  | 0.9983 | gypsum                   |             |
| 48.98  | 2.3352         | 70.4   | 8161.3  | 0.9983 | feldspar (orthoclase)    |             |
| 50.027 | 2.28936        | 67.4   | 0       | 0      | feldspar (orthoclase)    |             |
| Total  |                | 671    |         |        |                          |             |

Table S8-8 X ray diffraction data of core 8 sample no.8

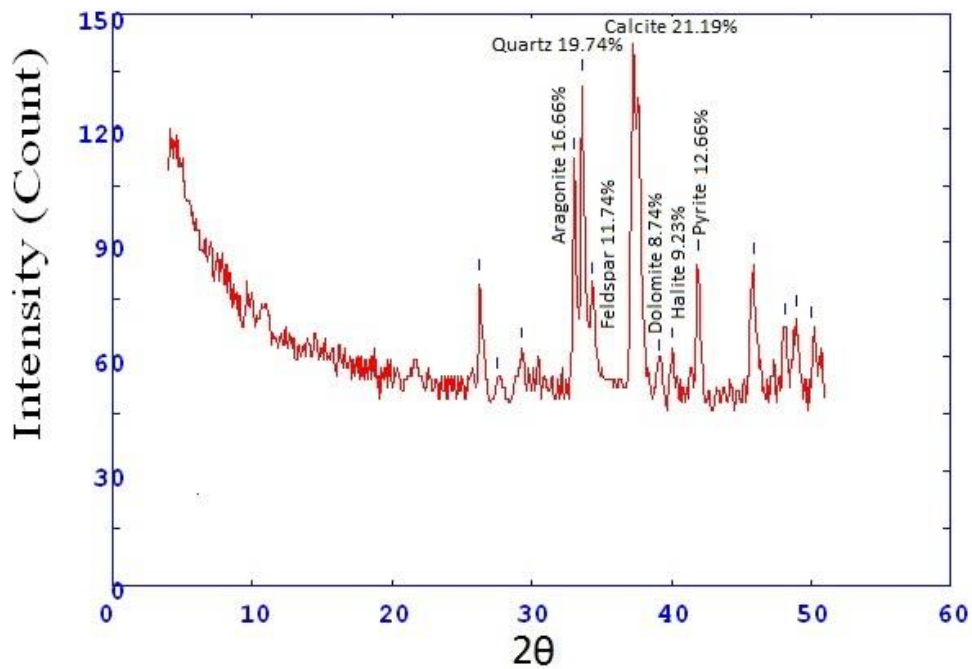

Fig.S11-8 X ray diffractogram of core 8 sample no.8

| 2Theta | d (Å)          | Height | Area   | FWHM   | Identified mineral       | WT%         |
|--------|----------------|--------|--------|--------|--------------------------|-------------|
| 26.234 | 4.26549        | 9.5    | 29     | 0.2942 | -                        |             |
| 29.067 | 3.85753        | 11     | 202.4  | 1.3297 | -                        |             |
| 33.042 | <b>3.40411</b> | 63.9   | 250.3  | 0.342  | Aragonite                | 19.5353103  |
| 33.686 | <b>3.34089</b> | 54.3   | 212.4  | 0.5453 | Quartz                   | 16.600428   |
| 34.35  | <b>3.27821</b> | 37.5   | 146.7  | 0.6469 | feldspar<br>(orthoclase) | 11.46438398 |
| 35.097 | <b>3.21058</b> | 8.4    | 33     | 0.6977 | feldspar (Albite )       | 2.568022012 |
| 37.255 | <b>3.03059</b> | 101.5  | 1100.1 | 0.7485 | calcite                  | 31.03026597 |
| 37.669 | 2.9985         | 87.5   | 948.1  | 0.6518 | -                        |             |
| 38.996 | <b>2.90019</b> | 15.8   | 171.7  | 0.5551 | Dolomite                 | 4.830327117 |
| 40.075 | <b>2.82521</b> | 8.1    | 87.7   | 0.4584 | halite                   | 2.47630694  |
| 41.887 | <b>2.70817</b> | 37.6   | 155.8  | 0.3617 | Pyrite                   | 11.49495567 |
| 45.783 | 2.48855        | 37.1   | 260    | 0.5242 | -                        |             |
| 47.294 | 2.4134         | 8.4    | 59     | 0.4413 | -                        |             |
| 48.023 | 2.37889        | 28.8   | 118.7  | 0.3583 | Pyrite                   |             |
| 48.954 | 2.33637        | 21.7   | 0      | 0      | feldspar                 |             |
| 50.198 | 2.28206        | 18.4   | 0      | 0      | -                        |             |
| Total  |                | 327.1  |        |        |                          |             |

Table S8-9 X ray diffraction data of core 8 sample no.9

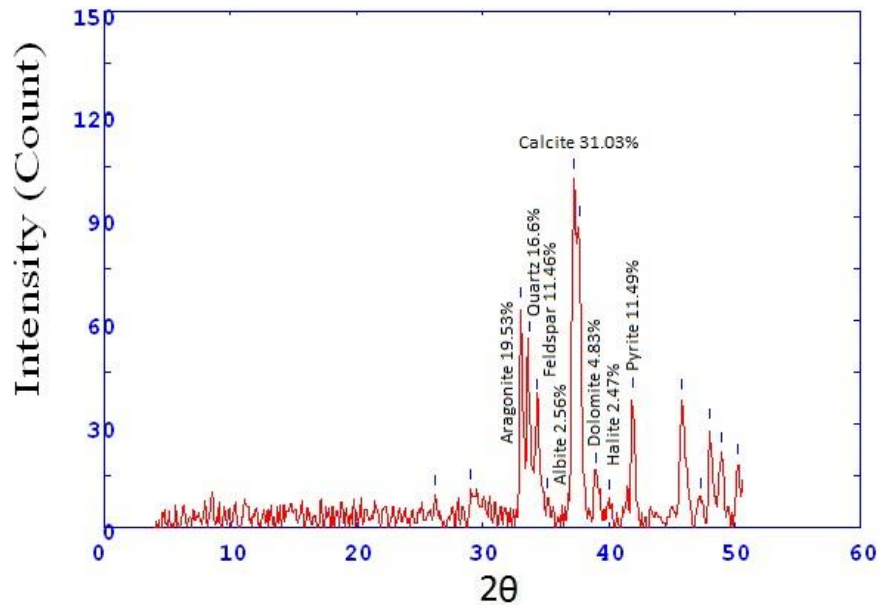

Fig.S11-9 X ray diffractogram of core 8 sample no.9

| 2Theta | d (A)          | Height | Area   | FWHM   | Identified mineral       | WT%         |
|--------|----------------|--------|--------|--------|--------------------------|-------------|
| 26.167 | 4.27631        | 11.5   | 67.7   | 0.45   | -                        | 0           |
| 29.384 | 3.81679        | 12.4   | 163.9  | 0.9761 | -                        |             |
| 33.017 | <b>3.40668</b> | 77.8   | 247.9  | 0.2918 | Quartz                   | 26.4986376  |
| 34.243 | <b>3.28815</b> | 42.7   | 136.1  | 0.4985 | feldspar<br>(orthoclase) | 14.54359673 |
| 35.47  | <b>3.17789</b> | 5.3    | 17     | 0.6019 | feldspar (Albite )       | 23.24561404 |
| 36.369 | 3.10183        | 5      | 15.9   | 0.6536 | -                        |             |
| 37.589 | <b>3.00465</b> | 104    | 1114.9 | 0.7053 | calcite                  | 35.42234332 |
| 39.232 | <b>2.88347</b> | 8      | 85.4   | 0.6161 | Dolomite                 | 2.72479564  |
| 40.033 | <b>2.82806</b> | 16.8   | 113.5  | 0.5268 | halite                   | 5.722070845 |
| 41.9   | <b>2.70733</b> | 39     | 167.7  | 0.3471 | Pyrite                   | 13.28337875 |
| 44.017 | 2.58315        | 6.1    | 9.7    | 0.1979 | -                        |             |
| 45.785 | 2.48847        | 41.2   | 206.2  | 0.4328 | -                        |             |
| 47.247 | 2.41566        | 9      | 44.8   | 0.4098 | -                        |             |
| 48.081 | 2.3762         | 27.1   | 118.8  | 0.3869 | -                        |             |
| 48.883 | 2.33954        | 22.8   | 118.8  | 0.3869 | Pyrite                   |             |
| Total  |                | 293.6  |        |        |                          |             |

Table S8-10X ray diffraction data of core 8 sample no.10

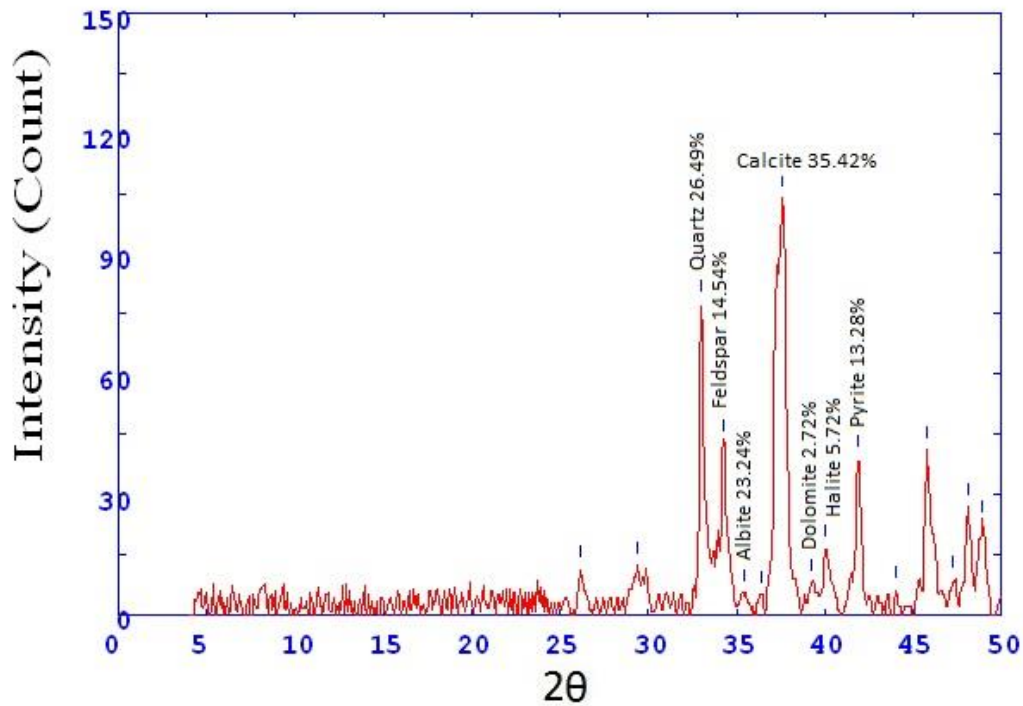

Fig.S11-10 X ray diffractogram of core 8 sample no.10



| 2Theta | d (A)           | Height | Area  | FWHM   | Identified mineral    | WT%      |
|--------|-----------------|--------|-------|--------|-----------------------|----------|
| 11.058 | <b>10.04719</b> | 19.7   | 70.4  | 0.2645 | Illite                | 5        |
| 14.529 | <b>7.65525</b>  | 13.8   | 38.2  | 0.1372 | Gypsum                | 3.502538 |
| 26.22  | 4.26776         | 26.1   | 91.7  | 0.2111 | Gypsum                |          |
| 27.144 | 4.12503         | 22.5   | 79.2  | 0.2785 | -                     |          |
| 29.141 | 3.84789         | 16.4   | 84.5  | 0.346  | illite                |          |
| 30.491 | 3.68126         | 9.8    | 50.7  | 0.3137 | Gypsum                |          |
| 32.782 | <b>3.43042</b>  | 44.3   | 228.6 | 0.2975 | Aragonite             | 11.24365 |
| 33.562 | <b>3.35287</b>  | 81.4   | 252.6 | 0.2813 | Quartz                | 20.6599  |
| 34.191 | <b>3.29299</b>  | 26.5   | 82.3  | 0.3346 | feldspar (orthoclase) | 6.725888 |
| 34.631 | 3.25237         | 69     | 214.2 | 0.3879 | -                     |          |
| 35.248 | <b>3.19723</b>  | 40.7   | 126.3 | 0.4411 | feldspar (Albite )    | 10.32995 |
| 37.241 | <b>3.03175</b>  | 115.4  | 745.8 | 0.4944 | Calcite               | 29.28934 |
| 38.95  | <b>2.90351</b>  | 28.9   | 165.4 | 0.4184 | Dolomite              | 7.335025 |
| 40.004 | 2.83001         | 17.1   | 98    | 0.3717 | halite                |          |
| 41.868 | <b>2.70935</b>  | 23.3   | 93    | 0.325  | Pyrite                | 5.913706 |
| 45.719 | 2.49186         | 33.2   | 240.8 | 0.55   | Calcite               |          |
| 46.434 | 2.45555         | 21.8   | 158.4 | 0.475  | Gypsum                |          |
| 47.227 | 2.41664         | 13.1   | 95.1  | 0.4562 | Gypsum                |          |
| 47.932 | 2.38316         | 17.1   | 124.1 | 0.4375 | Pyrite                |          |
| 48.781 | 2.34412         | 21.3   | 120.2 | 0.4    | gypsum                |          |
| 50.119 | 2.28544         | 24.2   | 188.8 | 0.5695 | feldspar              |          |
| 52.3   | 2.19644         | 13.2   | 68.2  | 0.3    | Dolomite              |          |
| Total  |                 | 394    |       |        |                       |          |

Table S9-1X ray diffraction data of core 9 sample no.1

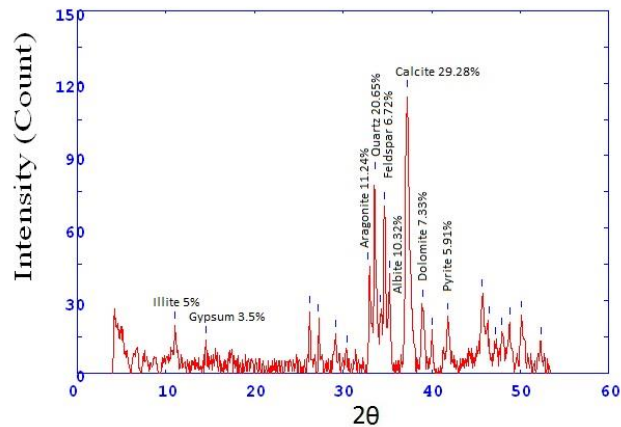

Fig.S12-1 X ray diffractogram of core 9 sample no.1

| 2Theta | d (A)          | Height | Area   | FWHM   | Identified mineral    | WT%      |
|--------|----------------|--------|--------|--------|-----------------------|----------|
| 15.402 | <b>7.22381</b> | 13     | 119.8  | 0.6363 | Gypsum                | 2.129402 |
| 23.733 | 4.70747        | 12.9   | 86.2   | 0.4821 | -                     |          |
| 26.205 | 4.27016        | 112.2  | 325    | 0.2552 | Gypsum                |          |
| 28.966 | 3.87064        | 13.9   | 60.8   | 0.2825 | -                     |          |
| 30.376 | <b>3.6949</b>  | 45.1   | 219    | 0.3495 | Aragonite             | 7.387387 |
| 33.567 | <b>3.35242</b> | 339.2  | 1406.8 | 0.3205 | Quartz                | 55.56102 |
| 34.569 | <b>3.25803</b> | 23     | 95.4   | 0.3413 | feldspar (orthoclase) | 3.767404 |
| 35.176 | <b>3.20358</b> | 20.9   | 86.8   | 0.362  | feldspar (Albite )    | 3.423423 |
| 37.202 | <b>3.03475</b> | 80.5   | 436.3  | 0.4036 | Calcite               | 13.18591 |
| 39.071 | <b>2.89484</b> | 88.8   | 382.4  | 0.3469 | Dolomite              | 14.54545 |
| 46.272 | 2.46368        | 46.5   | 173.8  | 0.3152 | feldspar (orthoclase) |          |
| 48.66  | 2.34961        | 13.5   | 117.5  | 0.6296 | feldspar (orthoclase) |          |
| 50.1   | 2.28625        | 43.6   | 199.6  | 0.3565 | feldspar (orthoclase) |          |
| 51.121 | 2.24358        | 16.8   | 199.6  | 0.3565 | feldspar (orthoclase) |          |
| Total  |                | 610.5  |        |        |                       |          |

Table S9-2X ray diffraction data of core 9 sample no.2

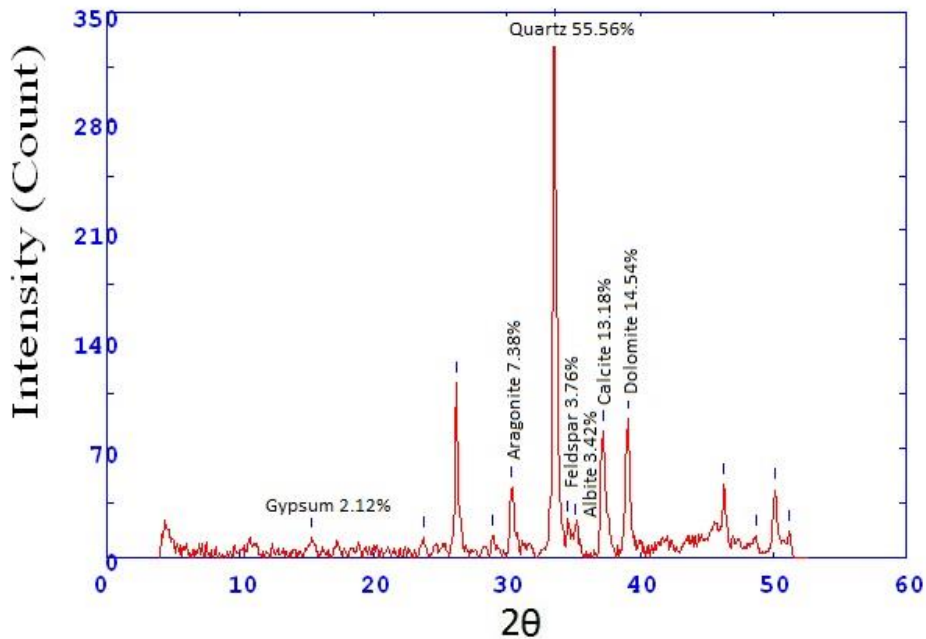

Fig.S12-2 X ray diffractogram of core 9 sample no.2

| 2Theta | d (A)          | Height | Area  | FWHM   | Identified mineral       | WT%      |
|--------|----------------|--------|-------|--------|--------------------------|----------|
| 30.434 | 3.68809        | 14.2   | 21.7  | 0.1935 | -                        | 0        |
| 32.978 | <b>3.4106</b>  | 101.2  | 155   | 0.2184 | Aragonite                | 25.33801 |
| 33.635 | <b>3.34579</b> | 130.8  | 286.9 | 0.2434 | Quartz                   | 32.74912 |
| 34.402 | <b>3.27336</b> | 59.3   | 130   | 0.4794 | feldspar<br>(orthoclase) | 14.84727 |
| 37.73  | <b>2.99385</b> | 48.1   | 461.6 | 0.7153 | Calcite                  | 12.04306 |
| 39.179 | <b>2.88719</b> | 10.1   | 97    | 0.5411 | Dolomite                 | 2.528793 |
| 41.442 | 2.73592        | 15.3   | 147.3 | 0.454  | -                        |          |
| 41.944 | <b>2.70461</b> | 49.9   | 192.9 | 0.3669 | Pyrite                   | 12.49374 |
| 45.8   | 2.48769        | 41.6   | 231.2 | 0.4759 | feldspar (orthoclase)    |          |
| 47.309 | 2.4127         | 17     | 94.3  | 0.4063 | feldspar (orthoclase)    |          |
| 48.113 | 2.37473        | 41.3   | 168   | 0.3368 | gypsum                   |          |
| 48.901 | 2.33874        | 33.5   | 136.1 | 0.2245 | gypsum                   |          |
| 50.731 | 2.25966        | 12.6   | 3.3   | 0.1121 | Pyrite                   |          |
| Total  |                | 399.4  |       |        |                          |          |

Table S9-3X ray diffraction data of core 9 sample no.3

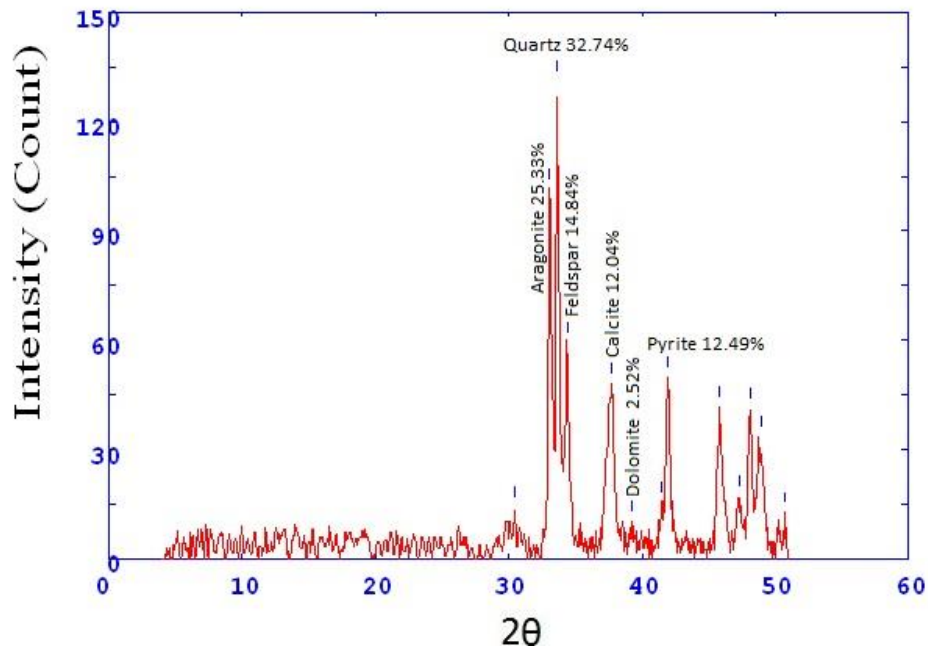

Fig.S12-3 X ray diffractogram of core 9 sample no.3

| 2Theta | d (A)           | Height | Area  | FWHM    | Identified mineral       | WT%      |
|--------|-----------------|--------|-------|---------|--------------------------|----------|
| 11.053 | <b>10.05114</b> | 18.2   | 134.2 | 0.5284  | Illite                   | 4.629865 |
| 15.595 | <b>7.13484</b>  | 17.5   | 203.4 | 0.8173  | Gypsum                   | 4.451793 |
| 22.28  | 5.01019         | 7.8    | 59.8  | 0.4828  | -                        |          |
| 23.863 | 4.68221         | 7.5    | 58    | 0.4346  | -                        |          |
| 24.936 | 4.4838          | 19.1   | 147.3 | 0.3864  | -                        |          |
| 26.288 | 4.25691         | 35.4   | 136.8 | 0.2901  | gypsum                   |          |
| 28.978 | 3.86902         | 9.9    | 38.3  | 0.3712  | -                        |          |
| 30.546 | 3.67484         | 12.6   | 48.8  | 0.4523  | -                        |          |
| 31.473 | <b>3.5692</b>   | 13.9   | 94    | 0.5064  | Aragonite                | 3.535996 |
| 33.651 | <b>3.3443</b>   | 108.3  | 313.3 | 0.2597  | Quartz                   | 27.55024 |
| 34.671 | <b>3.24875</b>  | 27.7   | 80    | 0.3134  | feldspar<br>(orthoclase) | 7.046553 |
| 35.166 | <b>3.20443</b>  | 23.9   | 69.2  | 0.3402  | feldspar (Albite)        | 6.079878 |
| 37.287 | <b>3.02811</b>  | 74.7   | 387.1 | 0.3671  | Calcite                  | 19.0028  |
| 39.167 | <b>2.88806</b>  | 97.8   | 488.4 | 0.3849  | Dolomite                 | 24.87917 |
| 42.032 | <b>2.69921</b>  | 11.1   | 72.1  | 0.4696  | Pyrite                   | 2.823709 |
| 43.927 | 2.5882          | 17.5   | 659.9 | 2.4667  | -                        |          |
| 45.891 | 2.483           | 18.1   | 680.9 | 1.3996  | Aragonite                |          |
| 46.433 | 2.4556          | 21.1   | 85.4  | 0.3326  | Aragonite                |          |
| 47.459 | 2.4055          | 18.8   | 75.9  | 24.9012 | Aragonite                |          |
| Total  |                 | 393.1  |       |         |                          |          |

Table S9-4X ray diffraction data of core 9 sample no.4

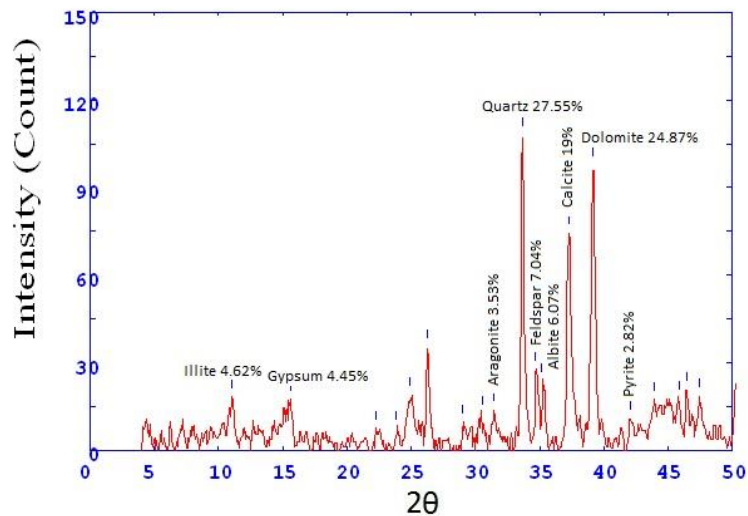

Fig.S12-4 X ray diffractogram of core 9 sample no.4

| 2Theta | d (A)          | Height | Area  | FWHM   | Identified mineral | WT%      |
|--------|----------------|--------|-------|--------|--------------------|----------|
| 26.189 | 4.27268        | 26.9   | 110.2 | 0.3512 | -                  |          |
| 29.083 | 3.85544        | 17     | 63.2  | 0.2948 | -                  |          |
| 30.367 | 3.69603        | 26.1   | 57    | 0.2327 | -                  |          |
| 32.907 | <b>3.41771</b> | 29.3   | 63.9  | 0.2538 | Aragonite          | 6.508219 |
| 33.597 | <b>3.34943</b> | 192    | 565.9 | 0.2749 | Quartz             | 42.64771 |
| 35.259 | <b>3.19621</b> | 22.1   | 65.2  | 0.321  | feldspar (Albite ) | 4.908929 |
| 37.214 | <b>3.03383</b> | 135.7  | 551.9 | 0.3671 | Calcite            | 30.14216 |
| 39.117 | <b>2.89157</b> | 34.7   | 279   | 0.5248 | Dolomite           | 7.707685 |
| 39.965 | <b>2.83271</b> | 16.1   | 129.3 | 0.4666 | halite             | 3.576188 |
| 41.901 | <b>2.7073</b>  | 20.3   | 98.3  | 0.4084 | Pyrite             | 4.509107 |
| 45.8   | 2.48769        | 32.1   | 133.8 | 0.3787 | -                  |          |
| 46.238 | 2.46539        | 19.9   | 83.1  | 0.3697 | -                  |          |
| 47.284 | 2.41391        | 14.4   | 60    | 0.3652 | Aragonite          |          |
| 47.981 | 2.38087        | 13.8   | 57.7  | 0.3641 | Aragonite          |          |
| 48.765 | 2.34486        | 14.4   | 60    | 0.363  | Aragonite          |          |
| 50.208 | 2.28164        | 43     | 209.1 | 0.3608 | Feldspar           |          |
| Total  |                | 450.2  |       |        |                    |          |

Table S9-5X ray diffraction data of core 9 sample no.5

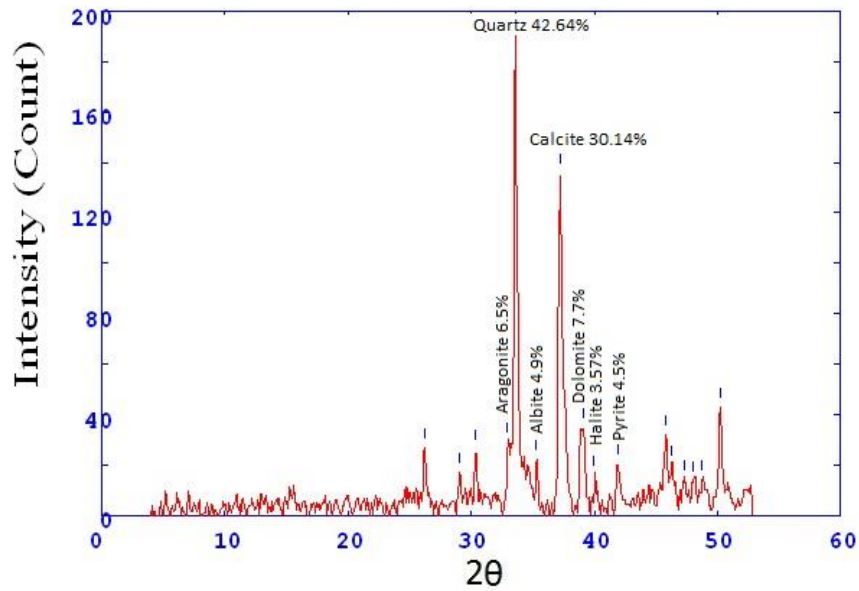

Fig.S12-5 X ray diffractogram of core 9 sample no.5

| 2Theta | d (Å)          | Height | Area   | FWHM   | Identified mineral    | WT%      |
|--------|----------------|--------|--------|--------|-----------------------|----------|
| 29.167 | 3.8445         | 18.9   | 87.6   | 0.3487 | -                     | 0        |
| 29.803 | 3.76424        | 11     | 51     | 0.3428 | -                     |          |
| 32.987 | <b>3.40963</b> | 66.5   | 268.5  | 0.337  | Aragonite             | 23.77547 |
| 34.259 | <b>3.28667</b> | 36.1   | 145.6  | 0.4634 | feldspar (orthoclase) | 12.90669 |
| 37.248 | <b>3.03119</b> | 138.6  | 1118.4 | 0.5898 | Calcite               | 49.55309 |
| 41.865 | <b>2.70952</b> | 38.5   | 113.9  | 0.2779 | Pyrite                | 13.76475 |
| 45.742 | 2.49065        | 47.1   | 275.9  | 0.45   | -                     |          |
| 47.294 | 2.41341        | 14.1   | 82.5   | 0.4383 | Aragonite             |          |
| 48     | 2.37997        | 24     | 128    | 0.4267 | Aragonite             |          |
| 48.861 | 2.34051        | 23.3   | 128    | 0.4267 | Aragonite             |          |
| 50.099 | 2.28629        | 21.6   | 128    | 0.4267 | Aragonite             |          |
| Total  |                | 279.7  |        |        |                       |          |

Table S9-6X ray diffraction data of core 9 sample no.6

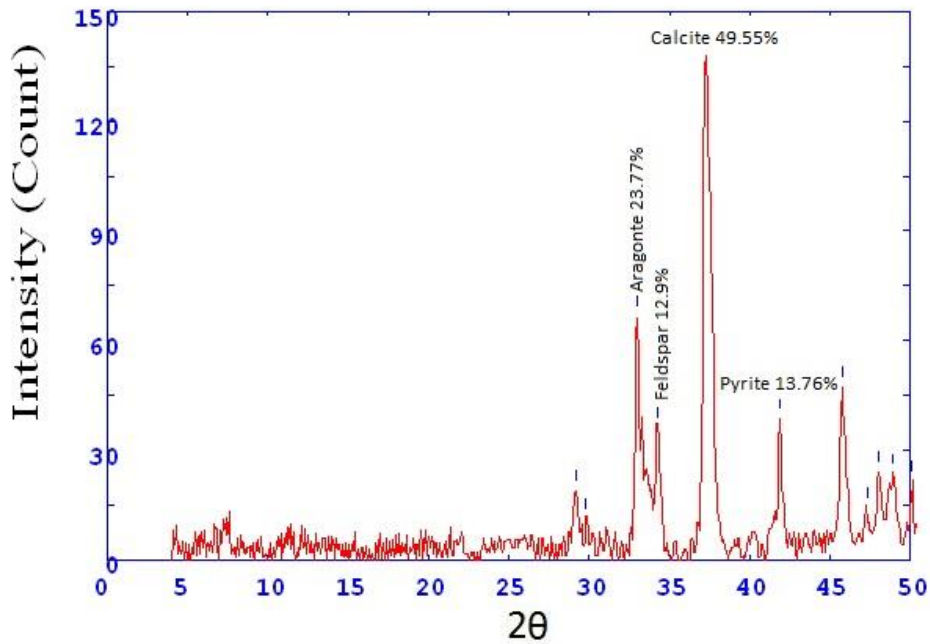

Fig.S12-6 X ray diffractogram of core 9 sample no.6

| 2Theta | d (A)   | Height | Area  | FWHM   | Identified mineral       | WT%      |
|--------|---------|--------|-------|--------|--------------------------|----------|
| 14.584 | 7.62642 | 55.3   | 168.6 | 0.2916 | Gypsum                   | 12.28889 |
| 26.234 | 4.26548 | 23.7   | 121.8 | 0.3756 | Gypsum                   |          |
| 28.066 | 3.99216 | 7.4    | 56.9  | 0.4755 | -                        |          |
| 29.35  | 3.82115 | 12.8   | 139.4 | 0.7083 | -                        |          |
| 33.029 | 3.40545 | 81.1   | 882.8 | 0.487  | Aragonite                | 18.02222 |
| 33.608 | 3.34837 | 157.7  | 457   | 0.2656 | Quartz                   | 35.04444 |
| 34.232 | 3.28915 | 50.6   | 146.6 | 0.5187 | Quartz                   |          |
| 34.748 | 3.24181 | 40.1   | 116.1 | 0.6453 | feldspar<br>(orthoclase) | 8.911111 |
| 37.261 | 3.03012 | 53.3   | 627.4 | 0.7719 | Calcite                  | 11.84444 |
| 37.67  | 2.99843 | 46.6   | 548.4 | 0.7009 | -                        |          |
| 39.233 | 2.88336 | 15.8   | 144.2 | 0.6298 | Dolomite                 | 3.511111 |
| 40.076 | 2.82514 | 13     | 119.3 | 0.4991 | halite                   |          |
| 41.365 | 2.74077 | 16.5   | 151.4 | 0.4337 | -                        |          |
| 41.953 | 2.70405 | 46.7   | 225.8 | 0.3684 | Pyrite                   | 10.37778 |
| 43.428 | 2.61645 | 5      | 24.4  | 0.2841 | -                        |          |
| 44.267 | 2.56931 | 7      | 10.7  | 0.1998 | -                        |          |
| 45.833 | 2.48598 | 40.2   | 234.5 | 0.4428 | Aragonite                |          |
| 46.436 | 2.45546 | 14.5   | 84.8  | 0.4144 | -                        |          |
| 47.468 | 2.4051  | 13.5   | 79    | 0.4003 | Aragonite                |          |
| 48.1   | 2.37531 | 36.6   | 164.6 | 0.3861 | Aragonite                |          |
| 48.929 | 2.3375  | 26.6   | 119.5 | 0.6169 | Aragonite                |          |
| 50.767 | 2.25818 | 11.2   | 114   | 0.8477 | Pyrite                   |          |
| Total  |         | 450    |       |        |                          |          |

Table S9-7X ray diffraction data of core 9 sample no.7

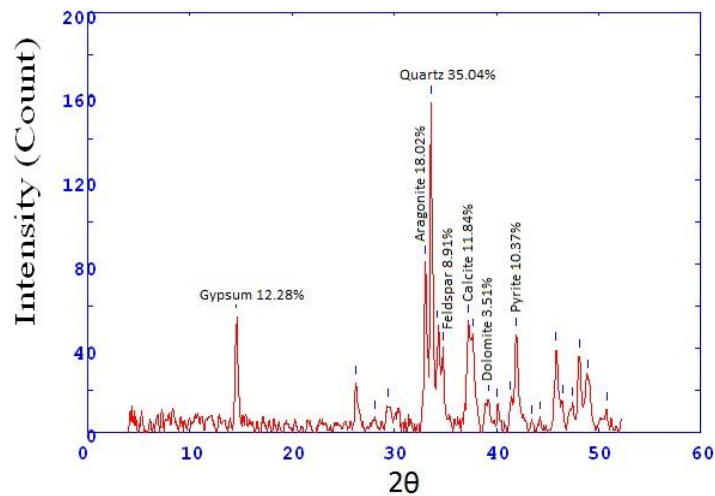

Fig.S12-7 X ray diffractogram of core 9 sample no.7

| 2Theta | d (Å)          | Height | Area  | FWHM   | Identified mineral       | WT%      |
|--------|----------------|--------|-------|--------|--------------------------|----------|
| 14.61  | <b>7.61338</b> | 17.6   | 52    | 0.3002 | Gypsum                   | 5.929919 |
| 26.367 | 4.24444        | 11.3   | 44.1  | 0.355  | -                        |          |
| 30     | 3.74012        | 14.4   | 52.7  | 0.3212 | -                        |          |
| 31.21  | 3.59854        | 10.3   | 37.6  | 0.3408 | -                        |          |
| 33.147 | <b>3.39367</b> | 87.4   | 403.1 | 0.3604 | Aragonite                | 29.44744 |
| 34.336 | <b>3.27948</b> | 49     | 225.8 | 0.5381 | feldspar<br>(orthoclase) | 16.50943 |
| 37.71  | <b>2.99534</b> | 60.4   | 625.7 | 0.7159 | Calcite                  | 20.3504  |
| 39.272 | <b>2.88065</b> | 9.4    | 97.6  | 0.5081 | Dolomite                 | 3.167116 |
| 40.205 | <b>2.81646</b> | 24.8   | 82.6  | 0.3003 | halite                   | 8.355795 |
| 42     | <b>2.7012</b>  | 48.2   | 188.8 | 0.3515 | Pyrite                   | 16.23989 |
| 45.933 | 2.48086        | 33.8   | 200.8 | 0.4628 | Aragonite                |          |
| 46.429 | 2.45582        | 25.7   | 153.1 | 0.5298 | -                        |          |
| 47.252 | 2.41545        | 11.9   | 70.9  | 0.5465 | Aragonite                |          |
| 48.074 | 2.37651        | 28.8   | 171.2 | 0.5632 | Aragonite                |          |
| 48.933 | 2.33729        | 31.8   | 228.6 | 0.5967 | Aragonite                |          |
| Total  |                | 296.8  |       |        |                          |          |

Table S9-8X ray diffraction data of core 9 sample no.8

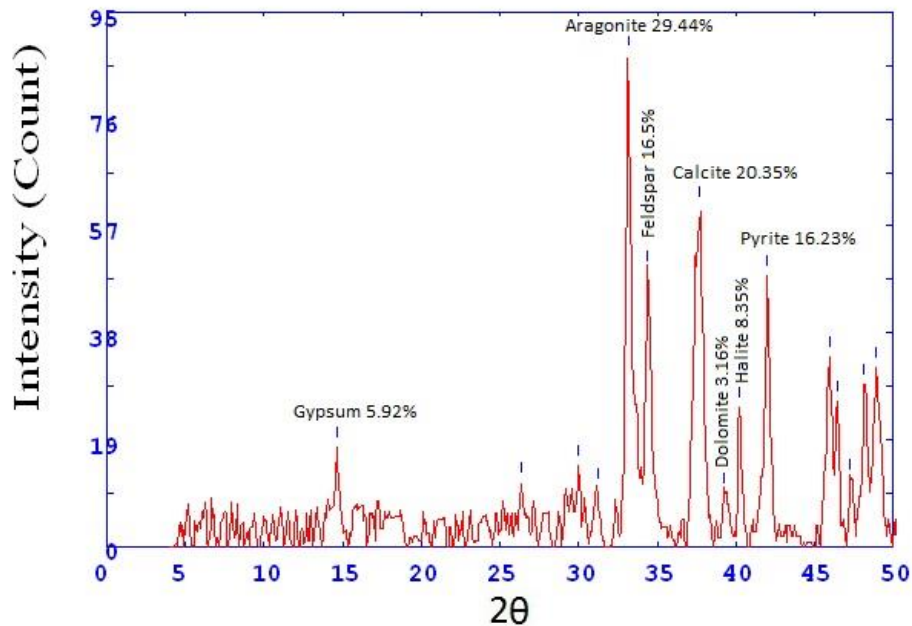

Fig.S12-8 X ray diffractogram of core 9 sample no.8



| 2Theta | d (Å)          | Height | Area  | FWHM   | Identified mineral    | WT%      |
|--------|----------------|--------|-------|--------|-----------------------|----------|
| 26.234 | 4.26558        | 11.4   | 77.9  | 0.4278 | -                     |          |
| 29.9   | 3.75241        | 10.9   | 263.4 | 1.8763 | -                     |          |
| 33.033 | <b>3.405</b>   | 87.5   | 458.6 | 0.4214 | Aragonite             | 27.61123 |
| 33.592 | <b>3.34993</b> | 53.7   | 281.6 | 0.5869 | Quartz                | 16.94541 |
| 34.331 | <b>3.27999</b> | 47.2   | 247.3 | 0.6697 | feldspar (orthoclase) | 14.89429 |
| 37.633 | <b>3.00123</b> | 59.1   | 576.2 | 0.7524 | Calcite               | 18.64942 |
| 39.17  | <b>2.88784</b> | 8.5    | 82.6  | 0.5478 | Dolomite              | 2.682234 |
| 40.154 | <b>2.81986</b> | 12     | 117.2 | 0.4455 | halite                | 3.786683 |
| 41.385 | 2.73954        | 15.3   | 149.1 | 0.3944 | -                     |          |
| 41.884 | <b>2.7083</b>  | 48.9   | 196.9 | 0.3432 | Pyrite                | 15.43074 |
| 42.779 | 2.65423        | 7.4    | 29.7  | 0.2994 | -                     |          |
| 43.189 | 2.63021        | 5.7    | 23.2  | 0.2775 | -                     |          |
| 44.127 | 2.57705        | 8      | 26.9  | 0.2556 | -                     |          |
| 44.748 | 2.54307        | 5.7    | 19.3  | 0.393  | -                     |          |
| 45.755 | 2.49003        | 36.6   | 273.2 | 0.5305 | Aragonite             |          |
| 47.209 | 2.41751        | 13.1   | 98    | 0.4483 | Aragonite             |          |
| 48.056 | 2.37738        | 42.1   | 182.3 | 0.3661 | Aragonite             |          |
| 48.849 | 2.34106        | 29.5   | 0     | 0      | Aragonite             |          |
| Total  |                | 316.9  |       |        |                       |          |

Table S9-9X ray diffraction data of core 9 sample no.9

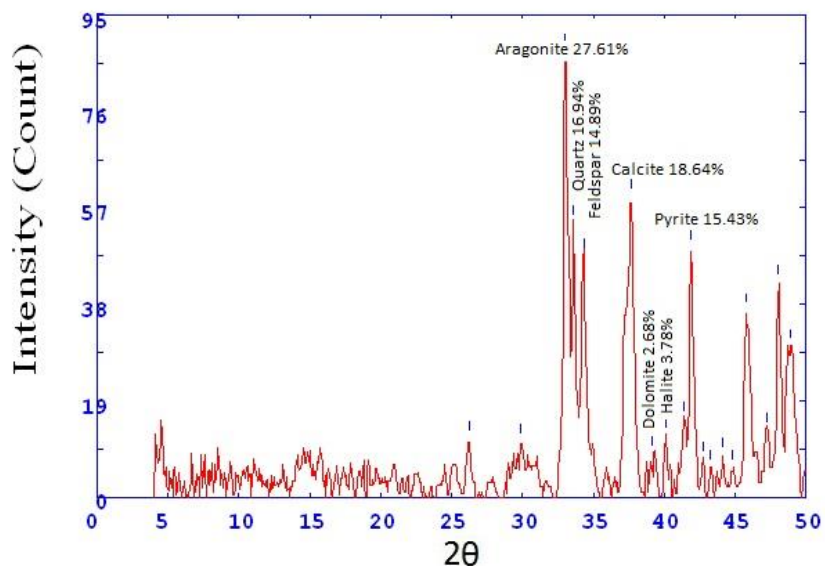

Fig.S12-9 X ray diffractogram of core 9 sample no.9

| 2Theta | d (A)          | Height | Area   | FWHM   | Identified mineral    | WT%      |
|--------|----------------|--------|--------|--------|-----------------------|----------|
| 14.538 | <b>7.65074</b> | 67.4   | 147.2  | 0.2273 | Gypsum                | 17.95418 |
| 29.383 | 3.81684        | 17.9   | 187.2  | 0.6231 | Gypsum                |          |
| 31.33  | 3.5851         | 5.9    | 73.8   | 0.5563 | -                     |          |
| 33.023 | <b>3.40603</b> | 60.9   | 248.6  | 0.3064 | Aragonite             | 16.2227  |
| 33.55  | <b>3.35403</b> | 27.8   | 113.3  | 0.4844 | Quartz                | 7.405434 |
| 34.425 | <b>3.27127</b> | 33     | 134.7  | 0.5735 | feldspar (orthoclase) | 8.790623 |
| 37.261 | <b>3.03017</b> | 117.8  | 1096.6 | 0.6625 | Gypsum                | 31.37986 |
| 39.062 | <b>2.89554</b> | 16.9   | 157.3  | 0.5131 | Dolomite              | 4.501865 |
| 40.02  | <b>2.82892</b> | 19.9   | 111.1  | 0.3637 | Halite                | 5.301012 |
| 41.249 | 2.74817        | 11.3   | 63     | 0.371  | -                     |          |
| 41.919 | <b>2.70615</b> | 31.7   | 170.6  | 0.3782 | Pyrite                | 8.444326 |
| 44.129 | 2.57694        | 8.5    | 69.9   | 0.5448 | -                     |          |
| 45.773 | 2.48906        | 42.3   | 262.4  | 0.4956 | Aragonite             |          |
| 48.016 | 2.37922        | 34.1   | 107.6  | 0.2857 | Aragonite             |          |
| 48.773 | 2.3445         | 21.4   | 67.5   | 0.4283 | Aragonite             |          |
| 50.252 | 2.27981        | 26.7   | 200    | 0.571  | Quartz                |          |
| 52.233 | 2.19904        | 13     | 101    | 0.5454 | feldspar (orthoclase) |          |
| Total  |                | 375.4  |        |        |                       |          |

Table S9-10X ray diffraction data of core 9 sample no.10

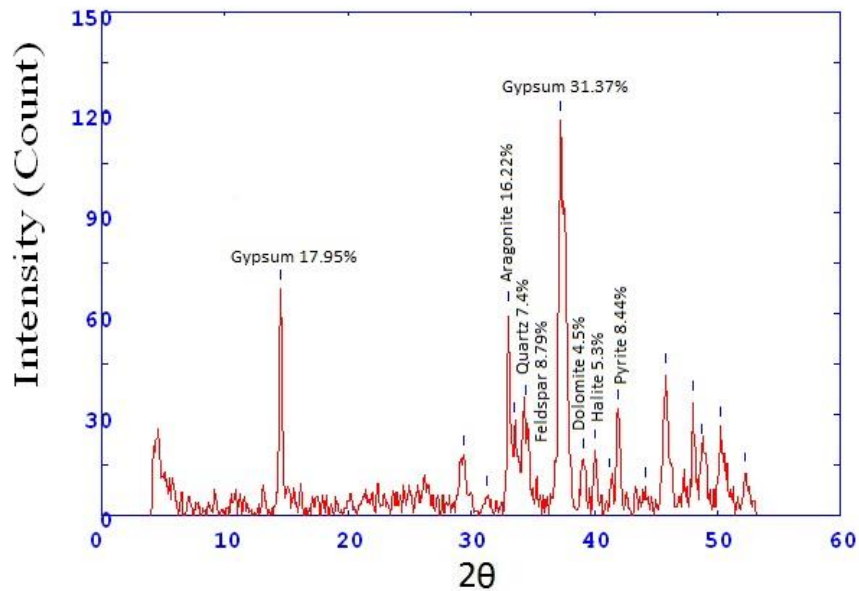

Fig.S12-10 X ray diffractogram of core 9 sample no.10

| 2Theta | d (A)          | Height | Area   | FWHM   | Identified mineral       | WT%      |
|--------|----------------|--------|--------|--------|--------------------------|----------|
| 29.133 | 3.84889        | 14     | 40.6   | 0.2119 | -                        |          |
| 33.016 | <b>3.40673</b> | 72.6   | 233.8  | 0.3043 | Aragonite                | 21.77564 |
| 33.469 | <b>3.36196</b> | 36.3   | 116.9  | 0.4946 | Quartz                   | 10.88782 |
| 34.137 | <b>3.29806</b> | 35.5   | 114.3  | 0.5897 | feldspar<br>(orthoclase) | 10.64787 |
| 37.267 | <b>3.0297</b>  | 126.7  | 1273.6 | 0.6849 | Calcite                  | 38.0024  |
| 40.112 | <b>2.8227</b>  | 20.9   | 107.9  | 0.3807 | halite                   | 6.268746 |
| 41.86  | <b>2.70981</b> | 41.4   | 169.9  | 0.3235 | Pyrite                   | 12.41752 |
| 45.7   | 2.49285        | 43.3   | 227.1  | 0.4175 | Aragonite                |          |
| 47.212 | 2.41735        | 11.7   | 61.6   | 0.3753 | Aragonite                |          |
| 47.993 | 2.38028        | 28.5   | 113.4  | 0.3332 | Aragonite                |          |
| 48.739 | 2.34603        | 21     | 83.4   | 0.5752 | Aragonite                |          |
| 50.504 | 2.26917        | 19.5   | 236.5  | 0.8173 | Quartz                   |          |
| 52.368 | 2.19379        | 14.8   | 98.6   | 0.5189 | feldspar                 |          |
| 54.466 | 2.11539        | 20.6   | 137.5  | 0.6595 | gypsum                   |          |
| 55.2   | 2.08942        | 22     | 238.9  | 0.8    | -                        |          |
| Total  |                | 333.4  |        |        |                          |          |

Table S9-11 X ray diffraction data of core 9 sample no.11

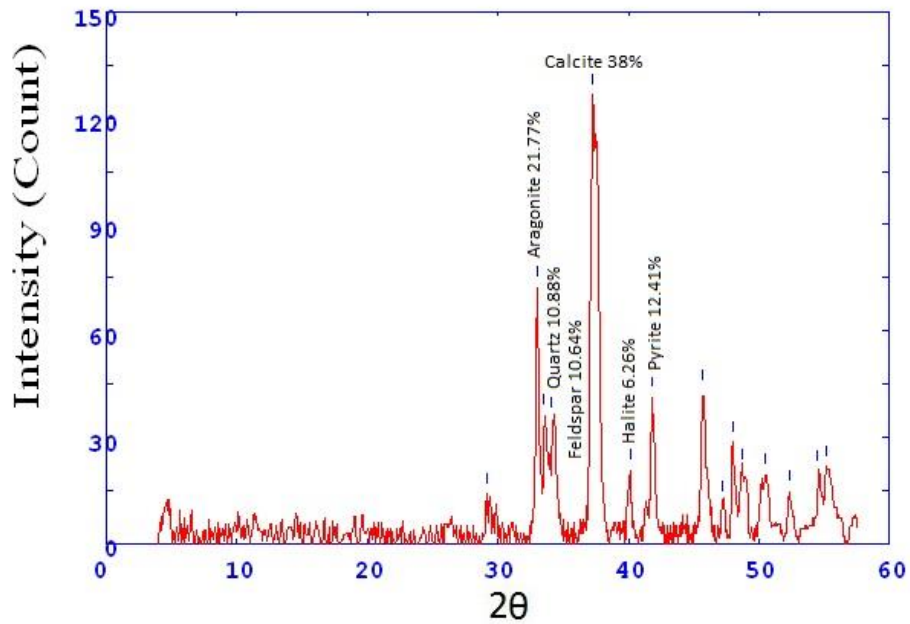

Fig.S12-11 X ray diffractogram of core 9 sample no.11

| 2Theta | d (A)           | Height | Area   | FWHM   | Identified mineral    | WT%      |
|--------|-----------------|--------|--------|--------|-----------------------|----------|
| 11.078 | <b>10.02865</b> | 18.7   | 78     | 0.3655 | Illite                | 2.265294 |
| 14.541 | <b>7.64914</b>  | 73.8   | 212.9  | 0.2498 | Gypsum                | 8.940036 |
| 17.397 | 6.40068         | 9.9    | 28.6   | 0.2512 | -                     |          |
| 23.879 | 4.67924         | 8.8    | 25.4   | 0.2516 | -                     |          |
| 24.974 | 4.47704         | 13.2   | 38     | 0.2519 | -                     |          |
| 26.247 | 4.26347         | 90.1   | 260.5  | 0.2526 | Gypsum                |          |
| 29.173 | 3.84374         | 15.4   | 44.4   | 0.2537 | Gypsum                |          |
| 29.447 | 3.80877         | 15.4   | 44.4   | 0.2542 | -                     |          |
| 30.404 | 3.69162         | 81.8   | 233.2  | 0.2547 | -                     |          |
| 31.273 | 3.59148         | 14.3   | 40.7   | 0.2976 | -                     |          |
| 32.003 | <b>3.5116</b>   | 9.9    | 28.2   | 0.319  | Aragonite             | 1.199273 |
| 33.567 | <b>3.35241</b>  | 369.7  | 1580.1 | 0.3404 | Quartz                | 44.78498 |
| 34.559 | <b>3.25895</b>  | 51.4   | 219.5  | 0.3874 | feldspar (orthoclase) | 13.37371 |
| 35.198 | <b>3.2016</b>   | 59     | 252.2  | 0.4109 | feldspar (Albite)     |          |
| 37.234 | <b>3.03226</b>  | 91.3   | 558.3  | 0.4345 | calcite               | 11.05996 |
| 39.046 | <b>2.89663</b>  | 98.9   | 653.9  | 0.4639 | dolomite              | 11.98062 |
| 40.036 | <b>2.82783</b>  | 36.1   | 238.7  | 0.5578 | halite                | 4.373107 |
| 42.615 | <b>2.66401</b>  | 16.7   | 144.7  | 0.6517 | Pyrite                | 2.023016 |
| 45.605 | 2.49776         | 18.6   | 161.4  | 0.496  | Gypsum                |          |
| 46.366 | 2.45895         | 24.8   | 115.7  | 0.3403 | Aragonite             |          |
| 50.172 | 2.28317         | 40.4   | 181.5  | 0.3299 | Gypsum                |          |
| 51.265 | 2.23771         | 13.2   | 59.2   | 0.3793 | Gypsum                |          |
| 54.028 | 2.13123         | 16     | 86.1   | 0.4288 | Gypsum                |          |
|        |                 | 825.5  |        |        |                       |          |

Table S10-1 X ray diffraction data of core 10 sample no.1

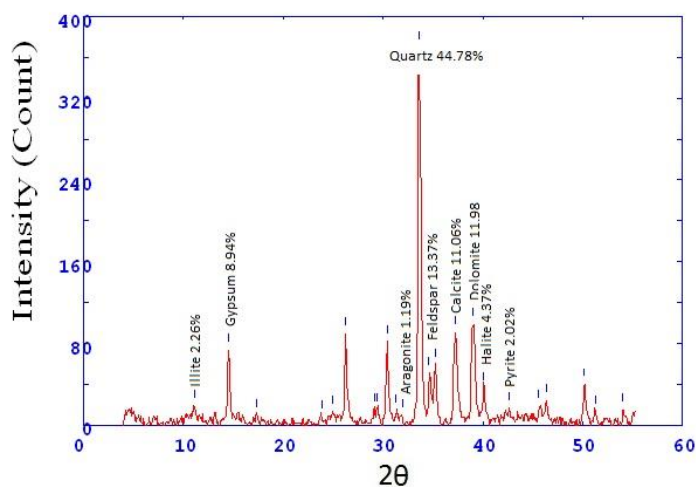

Fig.S13-1 X ray diffractogram of core 10 sample no.1

| 2Theta | d (A)          | Height | Area  | FWHM   | Identified mineral    | WT%         |
|--------|----------------|--------|-------|--------|-----------------------|-------------|
| 15.329 | <b>7.25803</b> | 16.3   | 192.2 | 0.9116 | Gypsum                | 3.03538175  |
| 24.89  | 4.49186        | 17.9   | 210.1 | 0.6001 | gypsum                |             |
| 26.221 | 4.26753        | 40.8   | 120.8 | 0.2887 | Gypsum                |             |
| 29.017 | 3.86403        | 10.7   | 31.8  | 0.306  | feldspar (orthoclase) |             |
| 30.42  | 3.68972        | 34.4   | 126.1 | 0.3232 | -                     |             |
| 31.361 | 3.58162        | 13.4   | 49.2  | 0.2888 | -                     |             |
| 33.624 | <b>3.34682</b> | 288.5  | 801.9 | 0.2544 | Quartz                | 53.72439    |
| 34.737 | <b>3.24275</b> | 49.9   | 138.7 | 0.4544 | feldspar (orthoclase) | 9.292364991 |
| 35.3   | <b>3.19267</b> | 15.2   | 42.2  | 0.5545 | feldspar (Albite)     |             |
| 37.283 | <b>3.02838</b> | 61.5   | 511.1 | 0.6545 | calcite               | 11.45251    |
| 39.056 | <b>2.89595</b> | 65.4   | 383.4 | 0.422  | Dolomite              | 12.17877    |
| 40.176 | <b>2.81838</b> | 30.3   | 177.7 | 0.3728 | halite                | 5.642458    |
| 42.333 | <b>2.68088</b> | 9.9    | 57.8  | 0.3482 | Pyrite                | 1.843575    |
| 45.109 | 2.52376        | 21.6   | 73.8  | 0.3236 | feldspar (orthoclase) |             |
| 50.312 | 2.27724        | 18.6   | 137.1 | 0.6012 | Gypsum                |             |
| 52.2   | 2.20035        | 12     | 85.1  | 0.4994 | Gypsum                |             |
| 54.056 | 2.13021        | 8.1    | 57.4  | 0.4692 | -                     |             |
| 55.317 | 2.08536        | 12.1   | 72.9  | 0.4389 | -                     |             |
| Total  |                | 537    |       |        |                       |             |

Table S10-2 X ray diffraction data of core 10 sample no.2

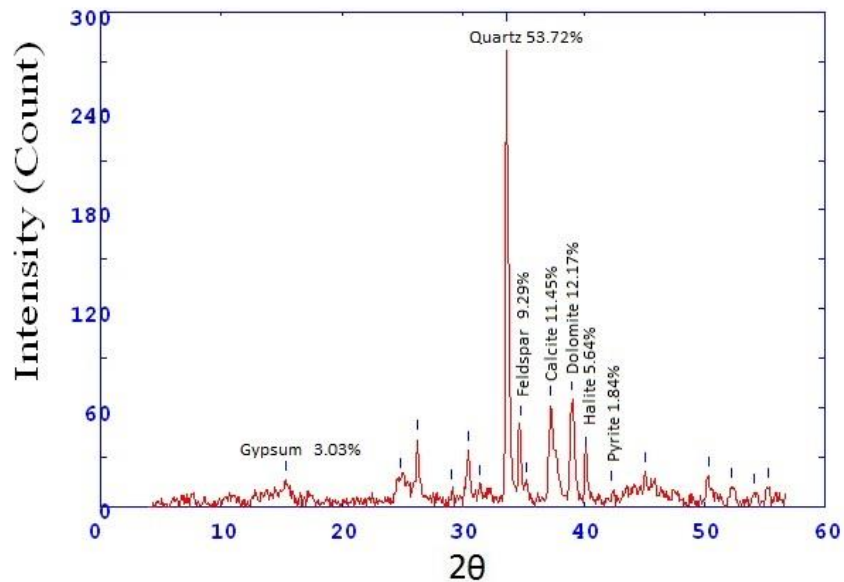

Fig.S13-2 X ray diffractogram of core 10 sample no.2

| 2Theta | d (A)          | Height | Area  | FWHM   | Identified mineral    | WT%      |
|--------|----------------|--------|-------|--------|-----------------------|----------|
| 29.478 | 3.80484        | 10.4   | 35    | 0.3333 | -                     |          |
| 31.167 | 3.60341        | 7.1    | 35    | 0.3333 | -                     |          |
| 33.092 | <b>3.39917</b> | 75.6   | 294.2 | 0.3123 | Aragonite             | 24.14564 |
| 33.643 | <b>3.34503</b> | 28.1   | 109.2 | 0.394  | Quartz                | 8.974768 |
| 34.323 | <b>3.2807</b>  | 43.8   | 170.2 | 0.4757 | feldspar (orthoclase) | 8.156425 |
| 37.691 | <b>2.99679</b> | 105.9  | 822.3 | 0.6391 | dolomite              | 19.72067 |
| 40.125 | <b>2.82181</b> | 18.3   | 57.6  | 0.3004 | halite                | 3.407821 |
| 41.953 | <b>2.70406</b> | 41.4   | 204.3 | 0.3833 | Pyrite                | 7.709497 |
| 43.417 | 2.61706        | 7.4    | 36.3  | 0.38   | Gypsum                |          |
| 44.352 | 2.56459        | 7.4    | 36.3  | 0.3783 | Aragonite             |          |
| 45.861 | 2.48455        | 41     | 168   | 0.3767 | feldspar (orthoclase) |          |
| 46.307 | 2.46192        | 21.7   | 88.9  | 0.3676 | Aragonite             |          |
| 47.327 | 2.41181        | 14     | 57.5  | 0.3586 | Aragonite             |          |
| 48.113 | 2.37469        | 34.2   | 145.1 | 0.3405 | Pyrite                |          |
| 49.027 | 2.33309        | 28.7   | 121.8 | 0.5452 | Aragonite             |          |
| 50.8   | 2.2568         | 20     | 180.8 | 0.75   | -                     |          |
| Total  |                | 313.1  |       |        |                       |          |

Table S10-3 X ray diffraction data of core 10 sample no.3

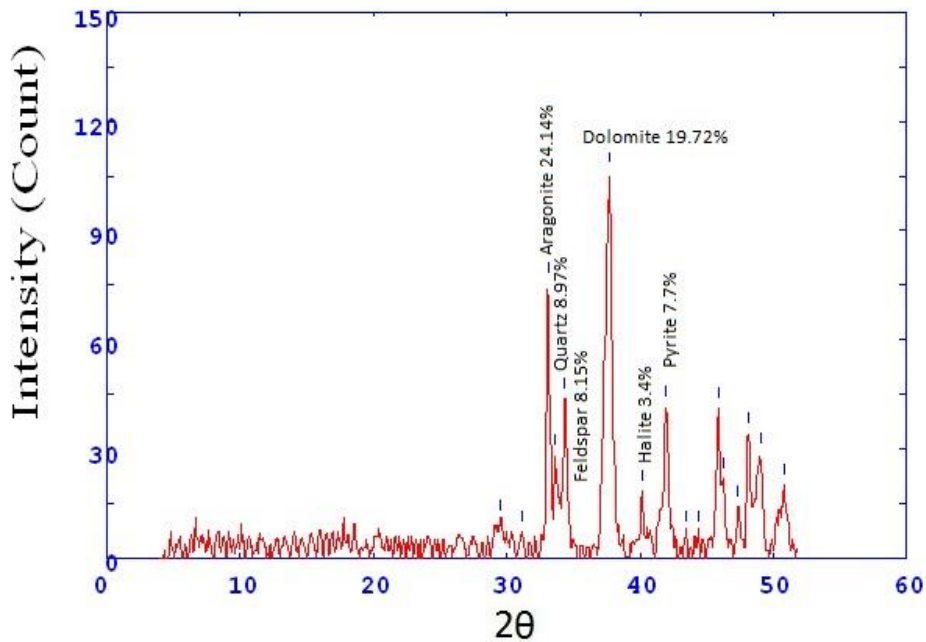

Fig.S13-3 X ray diffractogram of core 10 sample no.3

| 2Theta | d (A)          | Height | Area  | FWHM   | Identified mineral       | WT%         |
|--------|----------------|--------|-------|--------|--------------------------|-------------|
| 15.458 | <b>7.19766</b> | 11.1   | 134.3 | 0.2954 | Gypsum                   | 1.973684211 |
| 26.146 | 4.27958        | 42.8   | 134.3 | 0.2954 | Gypsum                   |             |
| 28.878 | 3.88215        | 11.1   | 34.9  | 0.2779 | Gypsum                   |             |
| 30.274 | 3.70706        | 29.4   | 78.3  | 0.2605 | -                        |             |
| 31.241 | 3.595          | 9.4    | 25.2  | 0.259  | -                        |             |
| 31.917 | 3.52086        | 9.4    | 25.2  | 0.2583 | -                        |             |
| 32.845 | <b>3.42396</b> | 37.5   | 100.1 | 0.2579 | Aragonite                | 6.667852063 |
| 33.488 | <b>3.36003</b> | 274.2  | 768.1 | 0.2576 | Quartz                   | 48.75533428 |
| 34.533 | <b>3.26133</b> | 38.4   | 107.5 | 0.3209 | feldspar<br>(orthoclase) | 6.827880512 |
| 37.127 | <b>3.04069</b> | 116.2  | 551.2 | 0.3842 | calcite                  | 20.66145092 |
| 39.007 | <b>2.89945</b> | 36.5   | 178.4 | 0.4073 | Dolomite                 | 6.490042674 |
| 39.935 | <b>2.83473</b> | 12.8   | 62.7  | 0.3423 | halite                   | 2.275960171 |
| 41.811 | <b>2.71282</b> | 26.3   | 90.9  | 0.2773 | Pyrite                   | 4.676386913 |
| 45.59  | 2.49855        | 21.3   | 73.9  | 0.2847 | Quartz                   |             |
| 46.295 | 2.46254        | 81.4   | 271.3 | 0.2921 | feldspar (orthoclase)    |             |
| 47.109 | 2.42234        | 12     | 39.9  | 0.319  | Aragonite                |             |
| 47.953 | 2.38216        | 9.4    | 31.4  | 0.3324 | Pyrite                   |             |
| 48.713 | 2.34723        | 11.1   | 37.1  | 0.3391 | Gypsum                   |             |
| 50.067 | 2.28768        | 21.2   | 87.6  | 0.3458 | Gypsum                   |             |
| Total  |                | 562    |       |        |                          |             |

Table S10-4 X ray diffraction data of core 10 sample no.4

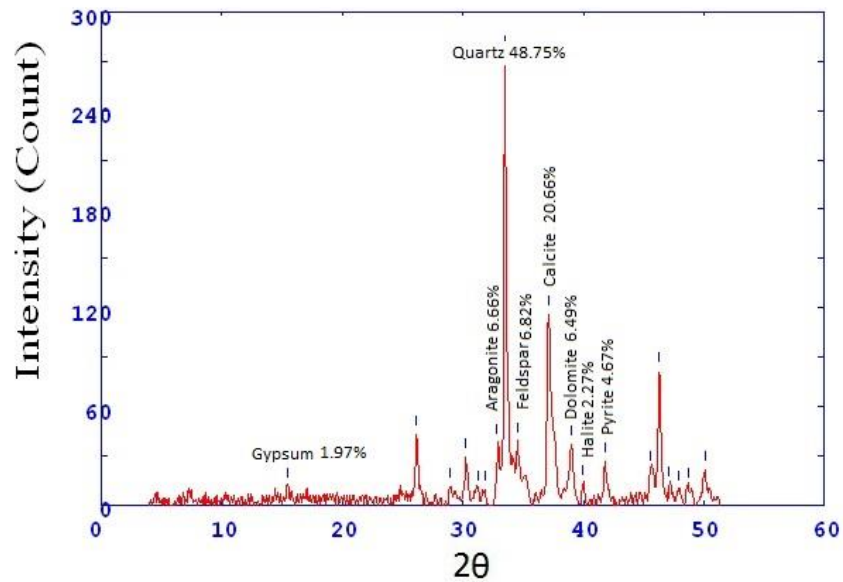

Fig.S13-4 X ray diffractogram of core 10 sample no.4

| 2Theta | d (A)   | Height | Area  | FWHM   | Identified mineral | WT%      |
|--------|---------|--------|-------|--------|--------------------|----------|
| 15.619 | 7.1242  | 10.9   | 54.8  | 0.4045 | Gypsum             | 2.42924  |
| 26.275 | 4.25899 | 56.9   | 160.3 | 0.2474 | Gypsum             |          |
| 29.017 | 3.86397 | 14.9   | 42    | 0.2515 | Gypsum             |          |
| 30.379 | 3.6945  | 20.9   | 48.4  | 0.2556 | dolomite           |          |
| 31.301 | 3.58838 | 4.3    | 10    | 0.2575 | -                  |          |
| 33.095 | 3.39885 | 37.8   | 87.6  | 0.2595 | Aragonite          | 8.424337 |
| 33.624 | 3.34688 | 171.9  | 488.2 | 0.2633 | Quartz             | 38.31068 |
| 37.241 | 3.03168 | 145.7  | 728.4 | 0.4444 | calcite            | 32.47158 |
| 39.067 | 2.89514 | 50.4   | 307.8 | 0.439  | dolomite           | 11.23245 |
| 40.108 | 2.82297 | 8.6    | 52.3  | 0.2873 | halite             | 1.916648 |
| 41.902 | 2.7072  | 23.4   | 143.3 | 0.2114 | Pyrite             | 5.215066 |
| 42.947 | 2.64438 | 32.8   | 29.2  | 0.1355 | -                  |          |
| 44.023 | 2.58283 | 8.6    | 7.6   | 0.2922 | -                  |          |
| 45.786 | 2.48843 | 30.2   | 162.7 | 0.4488 | Gypsum             |          |
| 46.469 | 2.4538  | 25.6   | 138   | 0.4427 | Gypsum             |          |
| 47.366 | 2.40993 | 12.3   | 66.2  | 0.4397 | Aragonite          |          |
| 48.252 | 2.36826 | 13.2   | 85.6  | 0.4366 | Aragonite          |          |
| Total  |         | 448.7  |       |        |                    |          |

Table S10-5 X ray diffraction data of core 10 sample no.5

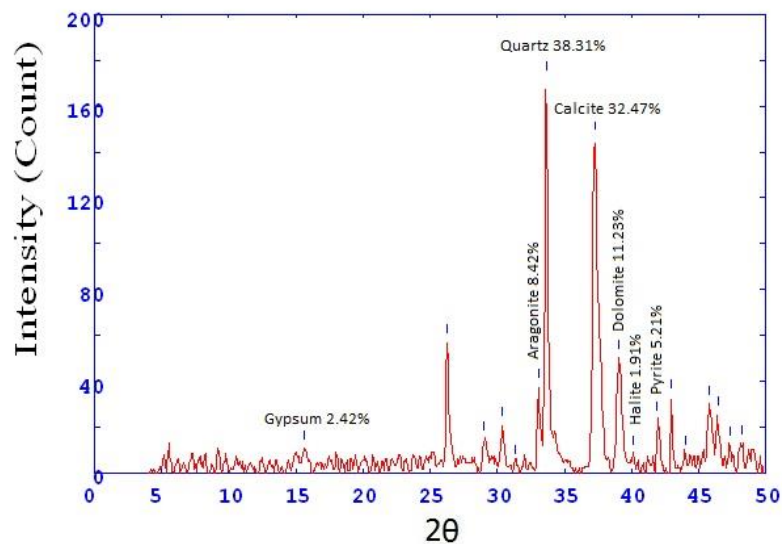

Fig.S13-5 X ray diffractogram of core 10 sample no.5



| 2Theta | d (A)          | Height | Area   | FWHM   | Identified mineral    | WT%         |
|--------|----------------|--------|--------|--------|-----------------------|-------------|
| 13.44  | <b>8.27245</b> | 92.6   | 1859.9 | 0.4128 | Illite                | 9.780313    |
| 14.9   | <b>7.46573</b> | 332.9  | 1859.9 | 0.4128 | Gypsum                | 35.16054    |
| 26.343 | 4.24818        | 61.3   | 370.2  | 0.4522 | Gypsum                |             |
| 26.888 | <b>4.16359</b> | 25.8   | 155.7  | 0.3556 | Goethite              | 2.724968    |
| 29.721 | 3.77448        | 162.9  | 355    | 0.259  | Gypsum                |             |
| 33.276 | <b>3.38084</b> | 21.7   | 47.2   | 0.2603 | Aragonite             | 2.291931    |
| 33.854 | <b>3.32476</b> | 137.1  | 389    | 0.2615 | Quartz                | 14.48035    |
| 34.873 | <b>3.23051</b> | 21.7   | 61.5   | 0.2837 | feldspar (orthoclase) | 2.291930714 |
| 35.477 | <b>3.17725</b> | 75.8   | 232.8  | 0.3059 | feldspar (Albite )    |             |
| 36.89  | 3.05951        | 61.8   | 189.8  | 0.3559 | -                     |             |
| 37.485 | <b>3.0127</b>  | 86.2   | 407.6  | 0.406  | calcite               | 9.104351    |
| 39.496 | <b>2.86495</b> | 60.8   | 287.2  | 0.3541 | dolomite              | 6.421631    |
| 40.376 | <b>2.80501</b> | 64.2   | 241.1  | 0.3023 | halite                | 6.780735    |
| 42.424 | <b>2.67539</b> | 28     | 184    | 0.5458 | Pyrite                | 2.95733     |
| 45.127 | 2.52279        | 12.4   | 81.6   | 0.5046 | -                     |             |
| 46     | 2.47746        | 19     | 116    | 0.4633 | Gypsum                |             |
| 46.556 | 2.44948        | 13.5   | 82.1   | 0.4539 | Aragonite             |             |
| 47.481 | 2.40446        | 7.3    | 44.5   | 0.4492 | Aragonite             |             |
| 48.826 | 2.34213        | 11.4   | 69.6   | 0.4468 | Aragonite             |             |
| 50.452 | 2.27132        | 21.2   | 115    | 0.4444 | Pyrite                |             |
| Total  |                | 946.8  |        |        |                       |             |

Table S10-6 X ray diffraction data of core 10 sample no.6

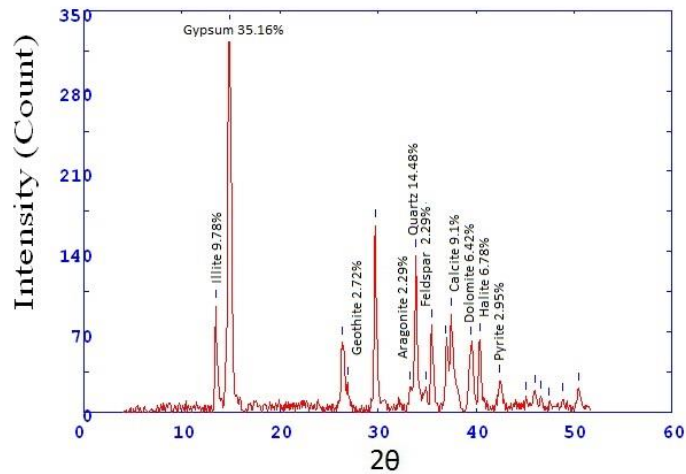

Fig.S13-6 X ray diffractogram of core 10 sample no.6

| 2Theta | d (A)          | Height | Area   | FWHM   | Identified mineral    | WT%      |
|--------|----------------|--------|--------|--------|-----------------------|----------|
| 13.245 | <b>8.39388</b> | 166.1  | 2297.5 | 0.4949 | Illite                | 15.1981  |
| 14.576 | <b>7.63084</b> | 322.2  | 2297.5 | 0.4949 | Gypsum                | 29.4812  |
| 26.12  | 4.28388        | 112.2  | 566.2  | 0.3752 | Gypsum                |          |
| 26.649 | 4.20024        | 45.8   | 231.3  | 0.3342 | Gypsum                |          |
| 29.367 | <b>3.81896</b> | 336.1  | 1162.3 | 0.2931 | Aragonite             | 30.75304 |
| 33.54  | <b>3.355</b>   | 22     | 167.7  | 0.6167 | Quartz                | 2.012993 |
| 35.586 | <b>3.16786</b> | 6.5    | 49.3   | 0.4847 | Feldspar (Albite)     | 0.594748 |
| 36.7   | <b>3.07482</b> | 107.4  | 455.2  | 0.3527 | Calcite               | 9.827066 |
| 39.285 | <b>2.87974</b> | 59.4   | 217.6  | 0.3023 | dolomite              | 5.435081 |
| 40.054 | <b>2.82666</b> | 25.6   | 93.8   | 0.3381 | halite                | 2.342392 |
| 42.227 | <b>2.68735</b> | 47.6   | 211    | 0.374  | Pyrite                | 4.355385 |
| 43.628 | 2.60502        | 11.8   | 52.2   | 0.3747 | -                     |          |
| 44.817 | 2.53935        | 22     | 114    | 0.3754 | -                     |          |
| 45.416 | 2.50762        | 15     | 77.5   | 0.35   | -                     |          |
| 47.389 | 2.40883        | 18.8   | 78     | 0.3245 | Feldspar (Albite)     |          |
| 51.667 | 2.22147        | 19.9   | 119.6  | 0.4425 | Gypsum                |          |
| 55.233 | 2.08825        | 25.3   | 256    | 0.7151 | calcite               |          |
| 58.084 | 1.99407        | 25.9   | 142.6  | 0.4116 | Feldspar (orthoclase) |          |
| 61.214 | 1.90126        | 61.7   | 379.2  | 0.4244 | -                     |          |
| 65.95  | 1.77856        | 21.2   | 175.7  | 0.6341 | -                     |          |
| Total  |                | 1092.9 |        |        |                       |          |

Table S10-7 X ray diffraction data of core 10 sample no.7

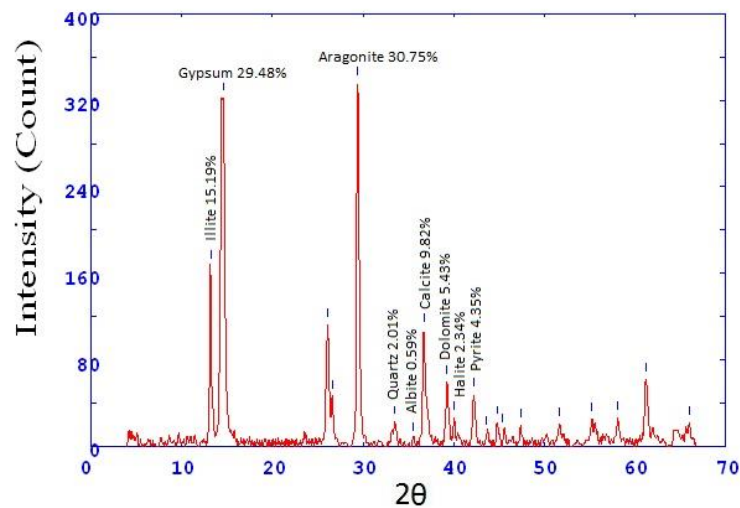

Fig.S13-7 X ray diffractogram of core 10 sample no.7

| 2Theta | d (Å)   | Height | Area   | FWHM   | Identified mineral | WT%      |
|--------|---------|--------|--------|--------|--------------------|----------|
| 13.133 | 8.46496 | 165    | 2297.5 | 0.4949 | Illite             | 20.72604 |
| 14.576 | 7.63084 | 322.2  | 2297.5 | 0.4949 | Gypsum             | 40.4723  |
| 23.558 | 4.74198 | 14.3   | 58.2   | 0.2891 | -                  |          |
| 26.12  | 4.28388 | 112.2  | 566.2  | 0.3752 | Gypsum             |          |
| 26.649 | 4.20024 | 46.9   | 236.7  | 0.3342 | Goethite           | 5.89122  |
| 29.367 | 3.81896 | 336.1  | 1162.3 | 0.2931 | Gypsum             |          |
| 33.54  | 3.355   | 22     | 167.7  | 0.6167 | Quartz             | 2.763472 |
| 36.7   | 3.07482 | 107.4  | 455.2  | 0.3527 | Calcite            | 13.49077 |
| 39.285 | 2.87974 | 59.4   | 217.6  | 0.3023 | dolomite           | 7.461374 |
| 40.054 | 2.82666 | 25.6   | 93.8   | 0.3381 | halite             | 3.215676 |
| 42.227 | 2.68735 | 47.6   | 211    | 0.374  | Pyrite             | 5.979148 |
| 43.74  | 2.5987  | 16     | 71.1   | 0.3747 | Gypsum             |          |
| 44.817 | 2.53935 | 22     | 114    | 0.3754 | -                  |          |
| 45.751 | 2.49023 | 18.2   | 94.1   | 0.35   | Gypsum             |          |
| 47.389 | 2.40883 | 18.8   | 78     | 0.3245 | -                  |          |
| 51.667 | 2.22147 | 19.9   | 119.6  | 0.4425 | Gypsum             |          |
| 55.233 | 2.08825 | 25.3   | 256    | 0.7151 | Gypsum             |          |
| 58.084 | 1.99407 | 25.9   | 142.6  | 0.4116 | -                  |          |
| 61.214 | 1.90126 | 61.7   | 379.2  | 0.4244 | -                  |          |
| 65.95  | 1.77856 | 21.2   | 175.7  | 0.6341 | -                  |          |
| Total  |         | 796.1  |        |        |                    |          |

Table S10-8 X ray diffraction data of core 10 sample no.8

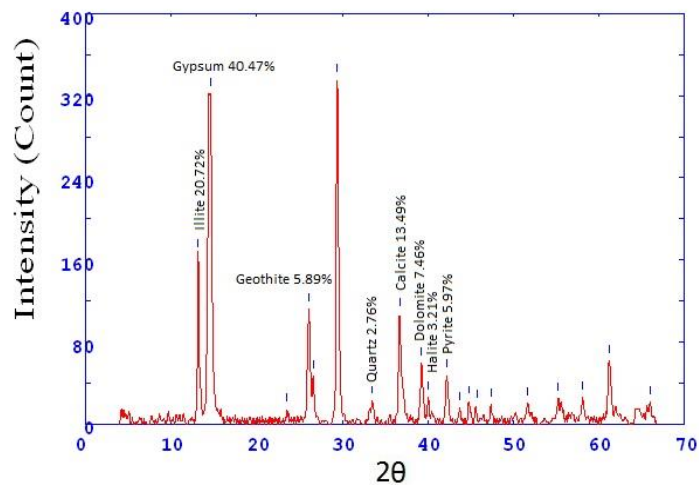

Fig.S13-8 X ray diffractogram of core 10 sample no.8

| 2Theta | d (A)   | Height | Area   | FWHM   | Identified mineral       | WT%      |
|--------|---------|--------|--------|--------|--------------------------|----------|
| 26.145 | 4.27986 | 17.5   | 42.6   | 0.2766 | Goethite                 | 4.995718 |
| 29.266 | 3.83178 | 16.2   | 107.1  | 0.5342 | -                        |          |
| 32.967 | 3.41169 | 73.3   | 290.5  | 0.3406 | Aragonite                | 20.92492 |
| 33.547 | 3.35431 | 51.7   | 204.8  | 0.5615 | Quartz                   | 0.147588 |
| 34.257 | 3.28678 | 49.4   | 195.6  | 0.672  | feldspar<br>(orthoclase) | 14.1022  |
| 37.573 | 3.00589 | 92.1   | 1041.5 | 0.7824 | calcite                  | 26.29175 |
| 38.963 | 2.90255 | 19.8   | 223.7  | 0.5718 | Dolomite                 | 5.652298 |
| 40.207 | 2.81635 | 8.2    | 92.3   | 0.4664 | halite                   | 2.340851 |
| 41.272 | 2.74669 | 11.6   | 131.7  | 0.4138 | -                        |          |
| 41.851 | 2.71036 | 38.3   | 170.1  | 0.3611 | Pyrite                   | 10.93349 |
| 45.747 | 2.49043 | 34.2   | 262.6  | 0.58   | Quartz                   |          |
| 47.133 | 2.4212  | 12.8   | 98.3   | 0.4744 | Aragonite                |          |
| 48.033 | 2.37841 | 30.6   | 154.5  | 0.3688 | Pyrite                   |          |
| 48.82  | 2.3424  | 23.5   | 118.8  | 0.6386 | Gypsum                   |          |
| 50.152 | 2.28406 | 16.6   | 83.7   | 0.7734 | Gypsum                   |          |
| 50.67  | 2.26222 | 19     | 234.4  | 0.9083 | -                        |          |
| 52.65  | 2.18287 | 11.2   | 90.3   | 0.5666 | calcite                  |          |
| Total  |         | 350.3  |        |        |                          |          |

Table S10-9 X ray diffraction data of core 10 sample no.9

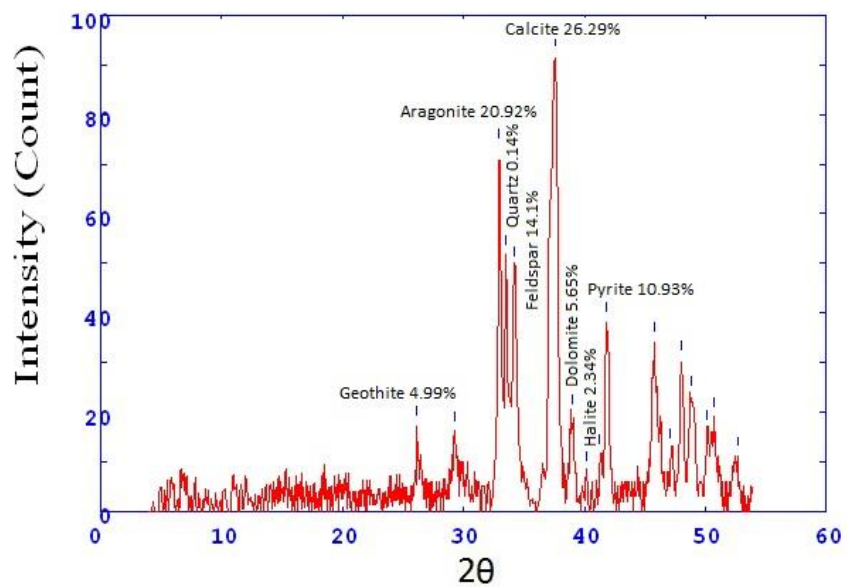

Fig.S13-9 X ray diffractogram of core 10 sample no.9

| 2Theta | d (Å)   | Height | Area   | FWHM   | Identified mineral | WT%      |
|--------|---------|--------|--------|--------|--------------------|----------|
| 26.334 | 4.24966 | 14.8   | 55.2   | 0.3062 | Goethite           | 4.766506 |
| 29.5   | 3.8021  | 14.4   | 82.4   | 0.4775 | -                  |          |
| 30.065 | 3.73223 | 11.1   | 63.4   | 0.3829 | -                  |          |
| 33.127 | 3.39568 | 79.8   | 246.6  | 0.2882 | Aragonite          | 25.70048 |
| 34.413 | 3.27241 | 47.9   | 148    | 0.4741 | Quartz             | 15.42673 |
| 37.767 | 2.99101 | 113.4  | 1019.1 | 0.6599 | calcite            | 36.52174 |
| 40.236 | 2.81435 | 11.1   | 99.7   | 0.5267 | dolomite           | 3.574879 |
| 42.016 | 2.70022 | 43.5   | 205.5  | 0.3934 | Pyrite             | 14.00966 |
| 45.933 | 2.48086 | 40     | 281.3  | 0.5578 | Quartz             |          |
| 47.455 | 2.4057  | 17.9   | 125.7  | 0.5089 | Aragonite          |          |
| 48.233 | 2.36914 | 32.2   | 198.7  | 0.46   | Gypsum             |          |
| 48.931 | 2.33737 | 26.8   | 198.7  | 0.46   | Aragonite          |          |
| Total  |         | 310.5  |        |        |                    |          |

Table S10-10 X ray diffraction data of core 10 sample no.10

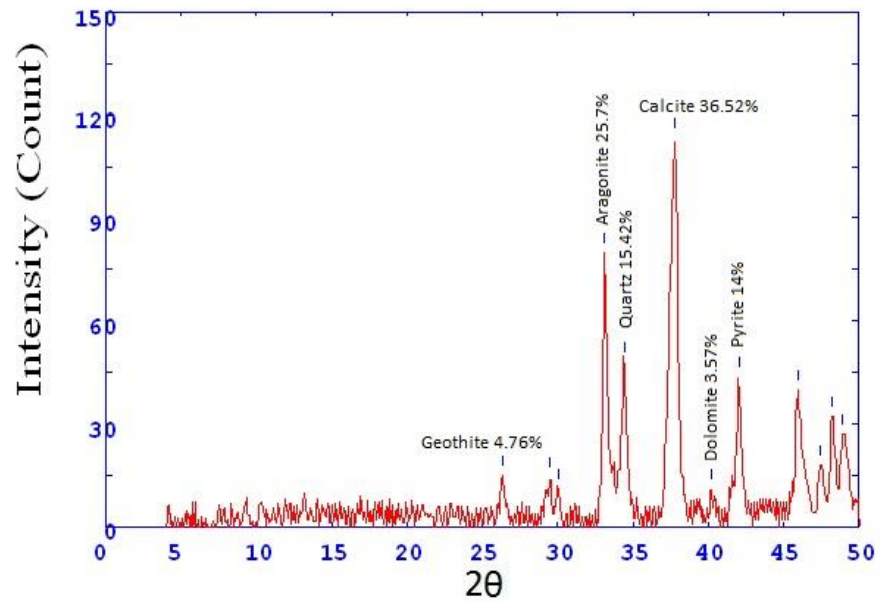

Fig.S13-10 X ray diffractogram of core 10 sample no.10

| 2Theta | d (Å)   | Height | Area  | FWHM   | Identified mineral    | WT%      |
|--------|---------|--------|-------|--------|-----------------------|----------|
| 13.085 | 8.49562 | 27.5   | 771.1 | 0.2181 | Illite                | 4.838142 |
| 14.479 | 7.68149 | 311.2  | 771.1 | 0.2181 | gypsum                | 54.75018 |
| 26.025 | 4.29921 | 37.7   | 199.4 | 0.3953 | gypsum                |          |
| 29.39  | 3.81604 | 72.3   | 157.3 | 0.2621 | gypsum                |          |
| 32.854 | 3.42306 | 25.5   | 55.6  | 0.2432 | aragonite             |          |
| 33.534 | 3.3556  | 116.9  | 227.8 | 0.2243 | quartz                | 20.5665  |
| 34.331 | 3.27999 | 19.7   | 38.3  | 0.2924 | feldspar (orthoclase) | 3.465869 |
| 36.545 | 3.0874  | 38.3   | 74.6  | 0.3605 | gypsum                |          |
| 37.193 | 3.03546 | 39     | 239.7 | 0.4968 | calcite               | 6.861365 |
| 39.088 | 2.89366 | 12.8   | 78.8  | 0.3953 | dolomite              | 2.251935 |
| 40.017 | 2.82916 | 23.7   | 87.6  | 0.2938 | halite                | 4.169599 |
| 42.168 | 2.69091 | 17.6   | 161.3 | 0.6133 | pyrite                | 3.096411 |
| 43.682 | 2.602   | 6.9    | 63.7  | 0.59   | feldspar (orthoclase) |          |
| 45.767 | 2.48941 | 14.1   | 111.3 | 0.5667 | aragonite             |          |
| 47.947 | 2.38244 | 12.8   | 101   | 0.4655 | gypsum                |          |
| 48.733 | 2.34629 | 25     | 120   | 0.3643 | aragonite             |          |
| Total  |         | 568.4  |       |        |                       |          |

Table S11-1X ray diffraction data of core 11 sample no.1

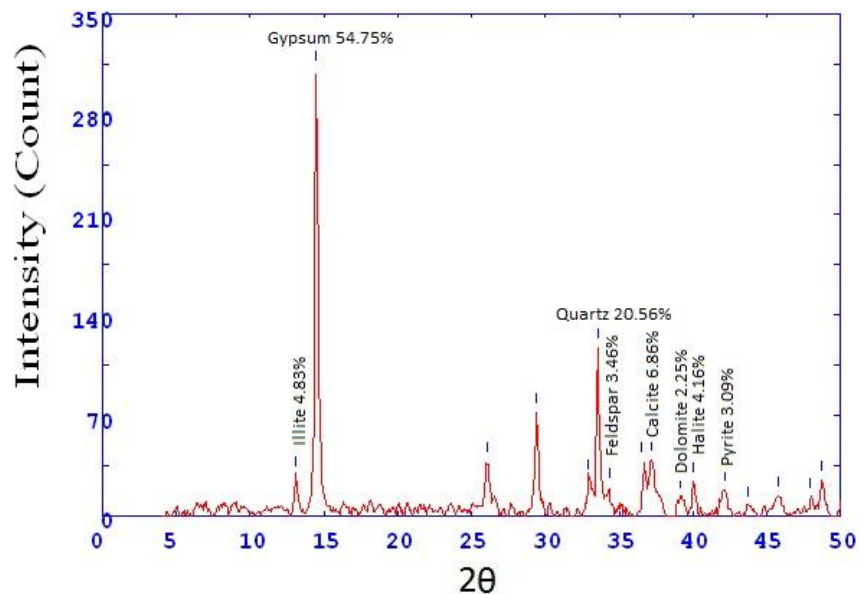

Fig.S14-1 X ray diffractogram of core 11 sample no.1

| 2Theta | d (Å)   | Height | Area   | FWHM   | Identified mineral    | WT%      |
|--------|---------|--------|--------|--------|-----------------------|----------|
| 11.431 | 9.72024 | 33.2   | 496.1  | 0.9852 | Illite                | 7.628676 |
| 13.025 | 8.53509 | 145    | 2166.7 | 0.7899 | Illite                |          |
| 14.567 | 7.63558 | 159.5  | 1492.7 | 0.5946 | gypsum                | 36.64982 |
| 25.992 | 4.3045  | 46     | 174.4  | 0.3146 | gypsum                |          |
| 26.716 | 4.18996 | 26.8   | 101.5  | 0.3458 | geothite              |          |
| 29.367 | 3.81897 | 171.5  | 923.7  | 0.377  | gypsum                |          |
| 33.525 | 3.35643 | 59.6   | 173.8  | 0.2681 | quartz                | 13.69485 |
| 34.433 | 3.27055 | 8.1    | 23.5   | 0.2858 | feldspar (orthoclase) | 1.861213 |
| 36.686 | 3.07595 | 66.6   | 206.4  | 0.3036 | calcite               | 15.30331 |
| 39.259 | 2.88158 | 25.9   | 105.7  | 0.3451 | dolomite              | 5.951287 |
| 42.149 | 2.69208 | 37.4   | 141.3  | 0.3329 | pyrite                | 8.59375  |
| 44.808 | 2.53982 | 18.1   | 50.7   | 0.2667 | Quartz                | 4.159007 |
| Total  |         | 435.2  |        |        |                       |          |

Table S11-2X ray diffraction data of core 11 sample no.2

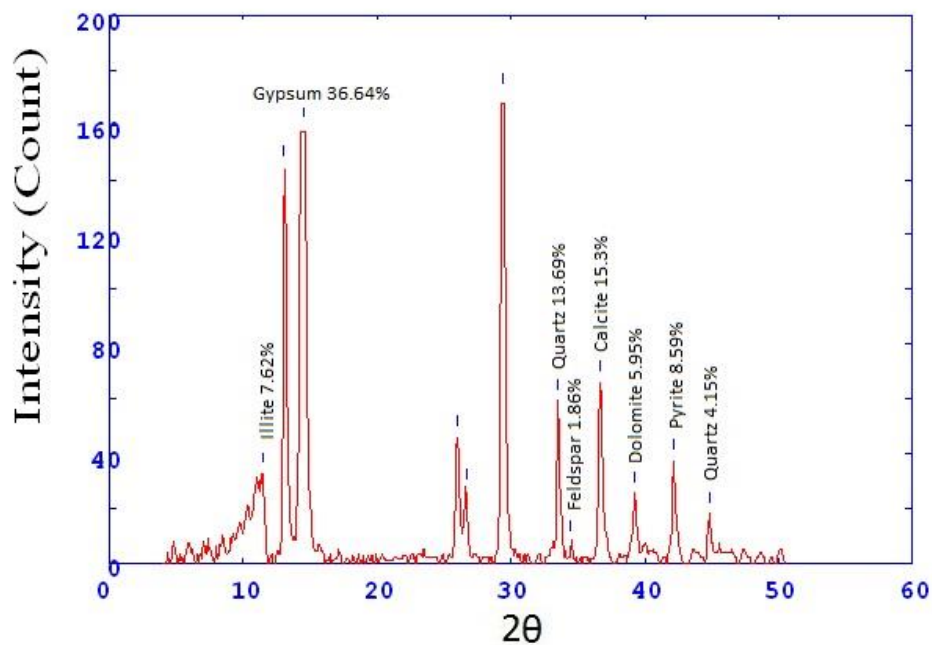

Fig.S14-2 X ray diffractogram of core 11 sample no.2

| 2Theta | d (Å)   | Height | Area   | FWHM   | Identified mineral | WT%      |
|--------|---------|--------|--------|--------|--------------------|----------|
| 13.078 | 8.50026 | 258.4  | 2934.4 | 0.5637 | Illite             | 33.25611 |
| 14.634 | 7.60093 | 322.3  | 2934.4 | 0.5637 | gypsum             | 41.48005 |
| 15.765 | 7.05871 | 15.5   | 140.9  | 0.5067 | gypsum             | 0        |
| 23.6   | 4.73375 | 13.5   | 74.6   | 0.4497 | gypsum             |          |
| 26.093 | 4.28811 | 117.9  | 599.8  | 0.3863 | gypsum             |          |
| 26.683 | 4.19496 | 49.6   | 252.1  | 0.3521 | geothite           |          |
| 29.5   | 3.80206 | 357.3  | 1249.3 | 0.3179 | gypsum             |          |
| 30.41  | 3.69092 | 30.9   | 107.9  | 0.2749 | gypsum             |          |
| 31.19  | 3.60084 | 26.5   | 92.5   | 0.2534 | -                  |          |
| 33.553 | 3.35371 | 53     | 137.3  | 0.2319 | quartz             | 6.821107 |
| 36.733 | 3.07214 | 77.7   | 241.6  | 0.2968 | calcite            | 10       |
| 39.301 | 2.87863 | 25.7   | 147.7  | 0.456  | dolomite           | 3.307593 |
| 40.115 | 2.8225  | 7.8    | 44.7   | 0.3746 | halite             | 1.003861 |
| 42.189 | 2.68964 | 32.1   | 97.3   | 0.2933 | pyrite             | 4.131274 |
| 43.668 | 2.60276 | 5.6    | 16.9   | 0.1467 | gypsum             |          |
| 44.708 | 2.54522 | 8.9    | 0      | 0      | calcite            |          |
| 50.081 | 2.28707 | 6.7    | 0      | 0      | gypsum             |          |
| 51.641 | 2.22252 | 10     | 0      | 0      | -                  |          |
| Total  |         | 777    |        |        |                    |          |

Table S11-3X ray diffraction data of core 11 sample no.3

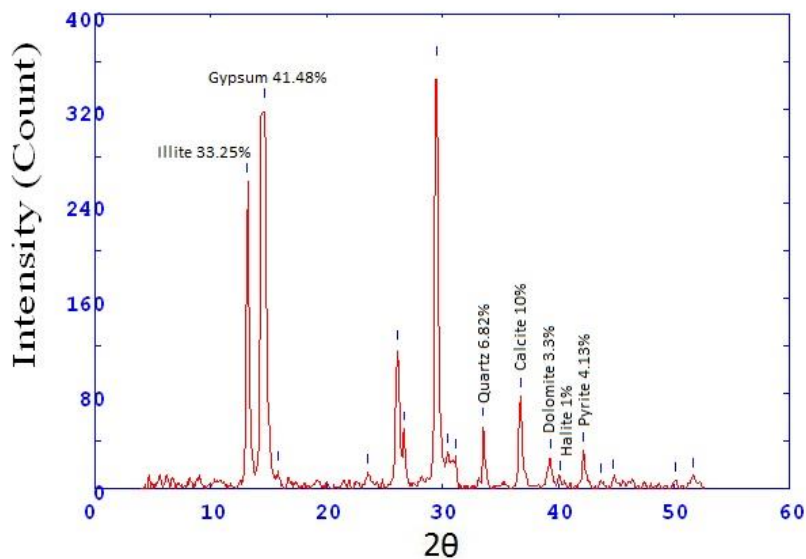

Fig.S14-3 X ray diffractogram of core 11 sample no.3



| 2Theta | d (A)   | Height | Area   | FWHM   | Identified mineral | WT%         |
|--------|---------|--------|--------|--------|--------------------|-------------|
| 13.15  | 8.45396 | 160.8  | 85.2   | 0.3255 | Illite             | 17.24212    |
| 14.521 | 7.65931 | 316.2  | 85.2   | 0.3255 | gypsum             | 33.90521    |
| 15.978 | 6.96482 | 16.1   | 4.3    | 0.3255 | -                  |             |
| 23.699 | 4.71427 | 17.1   | 85.2   | 0.3255 | -                  |             |
| 26.135 | 4.28143 | 143.9  | 458.1  | 0.3115 | Gypsum             |             |
| 26.692 | 4.19364 | 43.7   | 139.3  | 0.2908 | Goethite           | 0           |
| 29.515 | 3.80019 | 337.2  | 1044.5 | 0.2702 | gypsum             |             |
| 33.677 | 3.34179 | 115.6  | 334.5  | 0.242  | Quartz             | 12.39545    |
| 35.434 | 3.18097 | 29.9   | 86.5   | 0.2725 | feldspar (Albite)  | 3.20609     |
| 36.838 | 3.0637  | 184.6  | 724.3  | 0.303  | calcite            | 19.79412395 |
| 39.398 | 2.87178 | 54.8   | 439.1  | 0.5693 | dolomite           | 5.876045    |
| 40.234 | 2.81454 | 20.3   | 162.8  | 0.4656 | halite             | 2.17671     |
| 42.31  | 2.68233 | 50.4   | 241.7  | 0.3619 | pyrite             | 5.404246    |
| 43.833 | 2.59343 | 8.6    | 41.2   | 0.3344 | Gypsum             |             |
| 44.948 | 2.53235 | 21.2   | 91.6   | 0.3069 | gypsum             |             |
| 50.264 | 2.27929 | 22     | 80.2   | 0.2841 | gypsum             |             |
| 51.8   | 2.21615 | 24     | 84.9   | 0.3139 | gypsum             |             |
| Total  |         | 932.6  |        |        |                    |             |

Table S11-4 X ray diffraction data of core 11 sample no.4

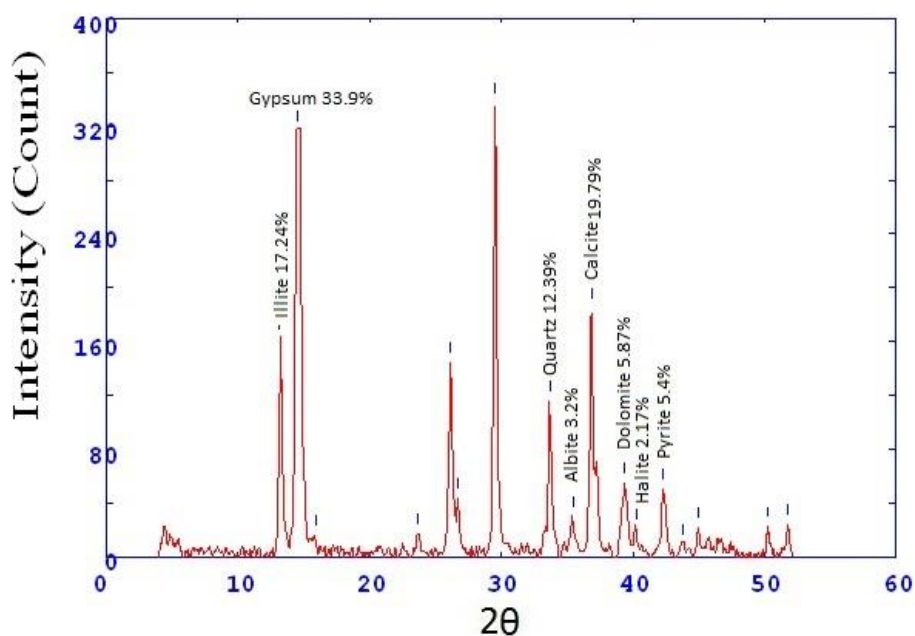

Fig.S14-4 X ray diffractogram of core 11 sample no.4

| 2Theta | d (A)   | Height | Area   | FWHM   | Identified mineral | WT%         |
|--------|---------|--------|--------|--------|--------------------|-------------|
| 13.046 | 8.5212  | 230.9  | 2673.3 | 0.5535 | Illite             | 27.12004    |
| 14.516 | 7.66217 | 317.4  | 3675.5 | 0.3844 | Gypsum             | 37.27977    |
| 15.741 | 7.06918 | 17.2   | 199    | 0.2998 | -                  |             |
| 23.594 | 4.73486 | 20.3   | 38     | 0.2152 | -                  |             |
| 26.043 | 4.29618 | 200.3  | 581.8  | 0.2689 | gypsum             |             |
| 26.603 | 4.20735 | 63.1   | 183.3  | 0.2939 | Goethite           |             |
| 29.434 | 3.81042 | 347.1  | 1220.3 | 0.319  | gypsum             | 0           |
| 33.149 | 3.39345 | 17.4   | 39.1   | 0.2182 | Quartz             | 2.043693    |
| 36.692 | 3.0755  | 159.7  | 633.1  | 0.3195 | calcite            | 18.75734085 |
| 39.223 | 2.88408 | 53.2   | 230.7  | 0.3593 | Dolomite           | 6.248532    |
| 40.569 | 2.79223 | 11.8   | 51.3   | 0.3515 | gypsum             |             |
| 42.126 | 2.69348 | 72.8   | 320.4  | 0.3437 | Pyrite             | 8.550623    |
| 43.591 | 2.60714 | 7.6    | 33.3   | 0.3206 | gypsum             |             |
| 44.75  | 2.54296 | 27.4   | 95.5   | 0.2975 | gypsum             |             |
| 45.388 | 2.50907 | 12.9   | 45.1   | 0.1488 | -                  |             |
| 46.368 | 2.45887 | 11.8   | 0      | 0      | gypsum             |             |
| Total  |         | 851.4  |        |        |                    |             |

Table S11-5X ray diffraction data of core 11 sample no.5

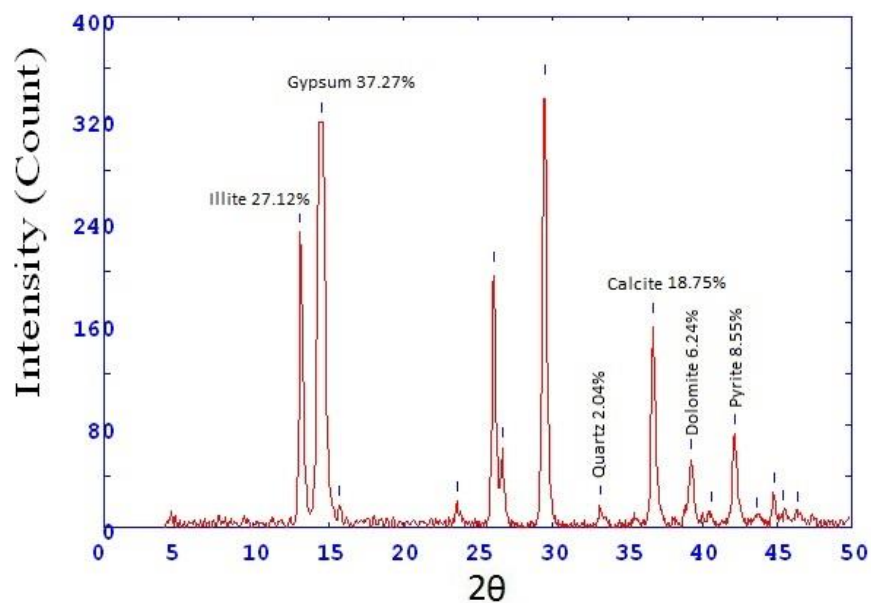

Fig.S14-5 X ray diffractogram of core 11 sample no.5

| 2Theta | d (A)   | Height | Area  | FWHM   | Identified mineral    | WT%       |
|--------|---------|--------|-------|--------|-----------------------|-----------|
| 14.568 | 7.63516 | 21.9   | 69.2  | 0.2894 | gypsum                | 5.968929  |
| 26.273 | 4.25925 | 14     | 96    | 0.5222 | gypsum                | 0         |
| 29.873 | 3.75563 | 13.9   | 48.4  | 0.2814 | gypsum                |           |
| 33.018 | 3.40653 | 102.9  | 399.2 | 0.3424 | aragonite             | 28.04579  |
| 33.566 | 3.35251 | 66.6   | 258.6 | 0.5313 | quartz                | 18.15209  |
| 34.272 | 3.2854  | 59.2   | 229.8 | 0.6258 | orthoclase (feldspar) | 16.13519  |
| 37.54  | 3.00842 | 38.8   | 150.7 | 0.4192 | calcite               | 10.57509  |
| 39.218 | 2.88444 | 8.4    | 32.7  | 0.3159 | dolomite              | 2.289452  |
| 40.056 | 2.82654 | 17.1   | 39.1  | 0.2126 | halite                | 0.770384  |
| 41.338 | 2.74252 | 15.2   | 34.8  | 0.2843 | -                     |           |
| 41.888 | 2.70807 | 52     | 216.7 | 0.356  | pyrite                | 14.172799 |
| 43.192 | 2.63004 | 6.5    | 27    | 0.5535 | -                     |           |
| 43.94  | 2.58744 | 6.5    | 55.9  | 0.7509 | -                     |           |
| 45.752 | 2.49017 | 36.8   | 212   | 0.434  | gypsum                |           |
| 47.079 | 2.42382 | 18.5   | 106.2 | 0.4225 | pyrite                |           |
| 48.052 | 2.37753 | 39.6   | 206.7 | 0.411  | pyrite                |           |
| 48.757 | 2.34524 | 36.2   | 189   | 0.5132 | gypsum                |           |
| 50.7   | 2.26095 | 6.8    | 57.9  | 0.6153 | -                     |           |
| 52.433 | 2.19125 | 12.6   | 112.6 | 0.568  | gypsum                |           |
| Total  |         | 366.9  |       |        |                       |           |

Table S11-6X ray diffraction data of core 11 sample no.6

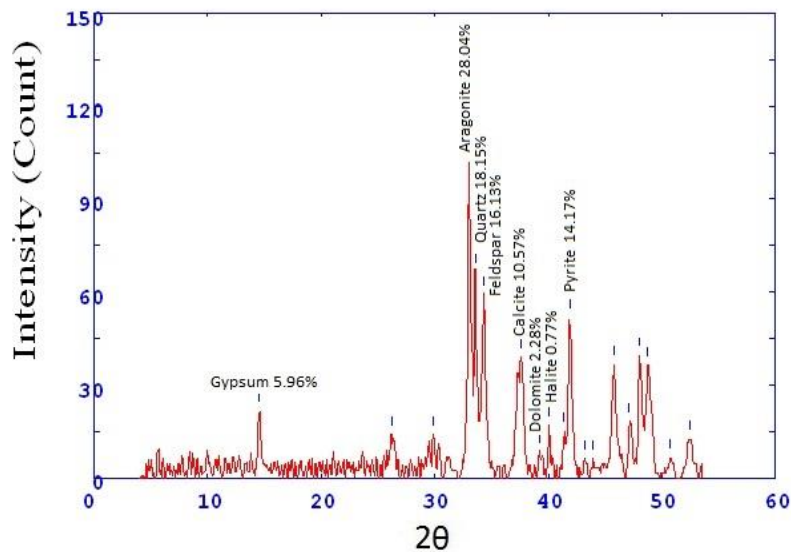

Fig.S14-6 X ray diffractogram of core 11 sample no.6

| 2Theta | d (Å)   | Height | Area   | FWHM   | Identified mineral | WT%         |
|--------|---------|--------|--------|--------|--------------------|-------------|
| 11.154 | 9.96052 | 13.3   | 34.8   | 0.281  | Illite             | 3.06635923  |
| 13.156 | 8.44991 | 163.1  | 428.7  | 0.3976 | Illite             |             |
| 14.64  | 7.59788 | 322.1  | 2402.1 | 0.5142 | gypsum             | 74.26792714 |
| 23.684 | 4.71709 | 9.7    | 72.2   | 0.4608 | -                  |             |
| 26.081 | 4.29008 | 103.9  | 535.1  | 0.4074 | gypsum             |             |
| 26.654 | 4.19956 | 35.3   | 181.6  | 0.3319 | Goethite           | 0           |
| 29.479 | 3.8047  | 337.3  | 966.5  | 0.2563 | gypsum             |             |
| 33.595 | 3.34968 | 83.5   | 314.1  | 0.2918 | quartz             | 19.25293982 |
| 35.472 | 3.1777  | 11.8   | 44.4   | 0.298  | feldspar (Albite)  | 2.720774729 |
| 36.786 | 3.06789 | 119.3  | 454.8  | 0.3041 | -                  |             |
| 38.081 | 2.96722 | 7.5    | 28.8   | 0.4539 | calcite            | 1.729305972 |
| 39.318 | 2.87737 | 48.7   | 376.4  | 0.6036 | dolomite           | 11.22896011 |
| 40.061 | 2.82618 | 25.7   | 198.3  | 0.4921 | halite             | 5.92575513  |
| 42.256 | 2.68556 | 44.8   | 226.1  | 0.3806 | pyrite             | 10.32972101 |
| 43.66  | 2.60322 | 11.8   | 59.5   | 0.3713 | -                  |             |
| 44.83  | 2.53867 | 19.3   | 97.2   | 0.3621 | -                  |             |
| 45.675 | 2.49415 | 24.1   | 101.4  | 0.3436 | gypsum             |             |
| 50.154 | 2.28397 | 18.4   | 68.3   | 0.3392 | feldspar (Albite)  |             |
| 51.768 | 2.21742 | 22.7   | 120.6  | 0.4082 | -                  |             |
| 54.089 | 2.12901 | 16.2   | 94.8   | 0.5283 | -                  |             |
| Total  |         | 433.7  |        |        |                    |             |

Table S11-7X ray diffraction data of core 11 sample no.7

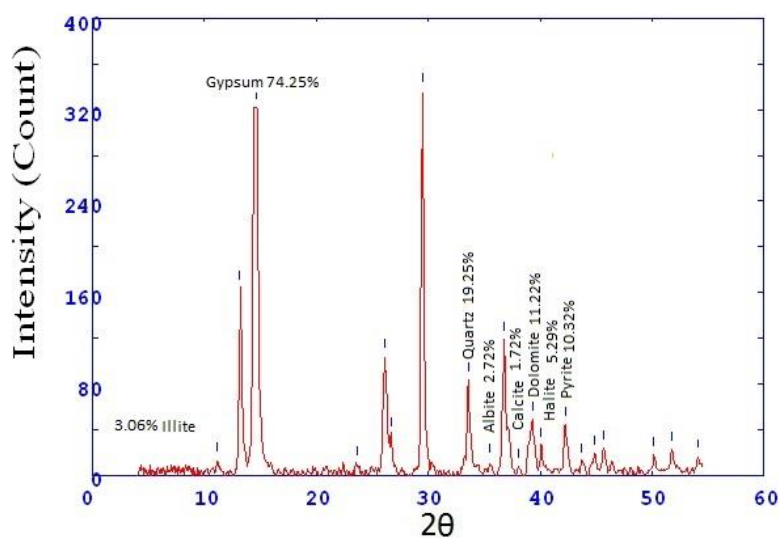

Fig.S14-7 X ray diffractogram of core 11 sample no.7

| 2Theta | d (Å)   | Height | Area   | FWHM   | Identified mineral | WT%      |
|--------|---------|--------|--------|--------|--------------------|----------|
| 13.194 | 8.42603 | 75.4   | 1795.1 | 0.3764 | Illite             | 8.070213 |
| 14.51  | 7.66524 | 323.2  | 7690.2 | 0.38   | gypsum             | 34.59274 |
| 23.724 | 4.70933 | 8.3    | 198.5  | 0.3818 | -                  |          |
| 26.242 | 4.26418 | 71.4   | 338.3  | 0.3836 | gypsum             | 0        |
| 27.673 | 4.04778 | 5.2    | 24.8   | 0.3181 | -                  |          |
| 29.478 | 3.80485 | 136.8  | 396.4  | 0.2526 | gypsum             |          |
| 30.387 | 3.69357 | 24.9   | 72     | 0.2516 | -                  |          |
| 33.102 | 3.39812 | 33.1   | 95.9   | 0.2511 | aragonite          | 3.542759 |
| 33.619 | 3.34734 | 327.7  | 925.7  | 0.2506 | quartz             | 35.07439 |
| 35.329 | 3.19008 | 35.6   | 200.3  | 0.3887 | feldspar (Albite)  |          |
| 36.804 | 3.06644 | 39.3   | 221.4  | 0.4389 | feldspar (Albite)  | 4.206358 |
| 37.246 | 3.03128 | 57.9   | 350.9  | 0.489  | calcite            | 6.197153 |
| 39.151 | 2.88919 | 29.1   | 296.5  | 0.6689 | dolomite           | 3.114631 |
| 40.095 | 2.8239  | 25.9   | 264.2  | 0.6163 | halite             | 2.772129 |
| 41.967 | 2.70324 | 22.7   | 202.1  | 0.5636 | pyrite             | 2.429626 |
| 45.767 | 2.48941 | 19.4   | 145.8  | 0.53   | feldspar (Albite)  |          |
| 48.1   | 2.37531 | 14.5   | 54.8   | 0.2686 | feldspar (Albite)  |          |
| Total  |         | 934.3  |        |        |                    |          |

Table S11-8X ray diffraction data of core 11sample no.8

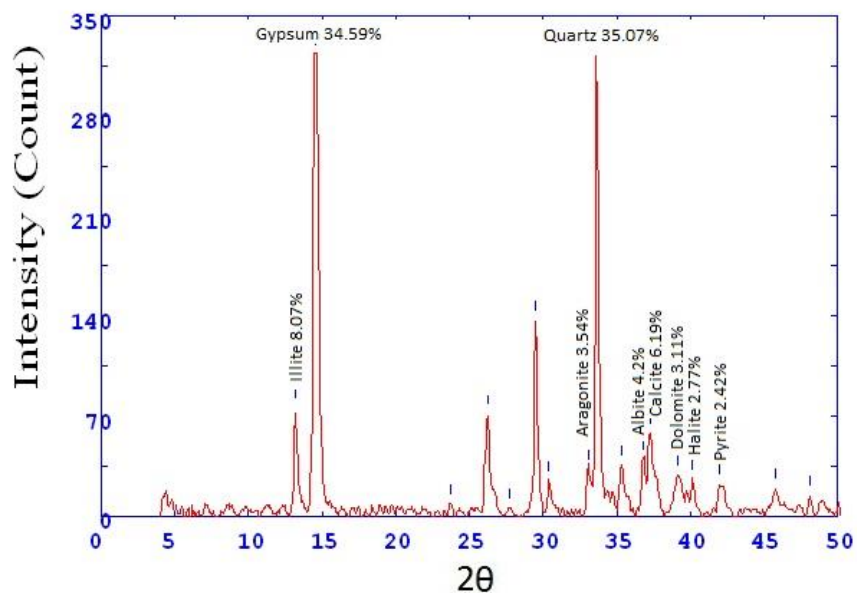

Fig.S14-8 X ray diffractogram of core 11 sample no.8

| 2Theta | d (Å)   | Height | Area  | FWHM   | Identified mineral    | WT%      |
|--------|---------|--------|-------|--------|-----------------------|----------|
| 26.162 | 4.27704 | 57.1   | 155.2 | 0.2525 | -                     | 0        |
| 29     | 3.8662  | 17     | 52    | 0.2888 | -                     |          |
| 30.362 | 3.69663 | 27.2   | 96    | 0.2949 | feldspar              |          |
| 32.87  | 3.42147 | 45.4   | 160.6 | 0.2799 | aragonite             | 7.706671 |
| 33.567 | 3.35241 | 264.5  | 753.7 | 0.265  | quartz                | 44.899   |
| 34.575 | 3.25751 | 65.3   | 186.2 | 0.415  | feldspar (orthoclase) | 11.08471 |
| 35.238 | 3.1981  | 35.9   | 102.2 | 0.49   | feldspar (albite)     | 6.094042 |
| 37.21  | 3.03418 | 88.1   | 658.1 | 0.5651 | calcite               | 14.95502 |
| 39.043 | 2.89686 | 39.8   | 206.7 | 0.4117 | dolomite              | 6.756069 |
| 40.069 | 2.82562 | 14.4   | 74.8  | 0.3346 | halite                | 2.444407 |
| 41.872 | 2.70909 | 35.7   | 101.7 | 0.2575 | pyrite                | 6.060092 |
| 45.748 | 2.49039 | 27     | 132   | 0.4045 | aragonite             |          |
| 47.269 | 2.41463 | 10.4   | 51    | 0.379  | aragonite             |          |
| 47.932 | 2.38316 | 12.8   | 62.7  | 0.3534 | feldspar (Albite)     |          |
| 48.879 | 2.33973 | 13.6   | 66.6  | 0.3279 | feldspar (Albite)     |          |
| 50.11  | 2.28585 | 37.4   | 120   | 0.3023 | feldspar (Albite)     |          |
| 52.333 | 2.19514 | 12     | 48    | 0.3222 | feldspar (Albite)     |          |
| 54.067 | 2.12982 | 12     | 38.7  | 0.3    | aragonite             |          |
| Total  |         | 589.1  |       |        |                       |          |

Table S11-9X ray diffraction data of core 11 sample no.9

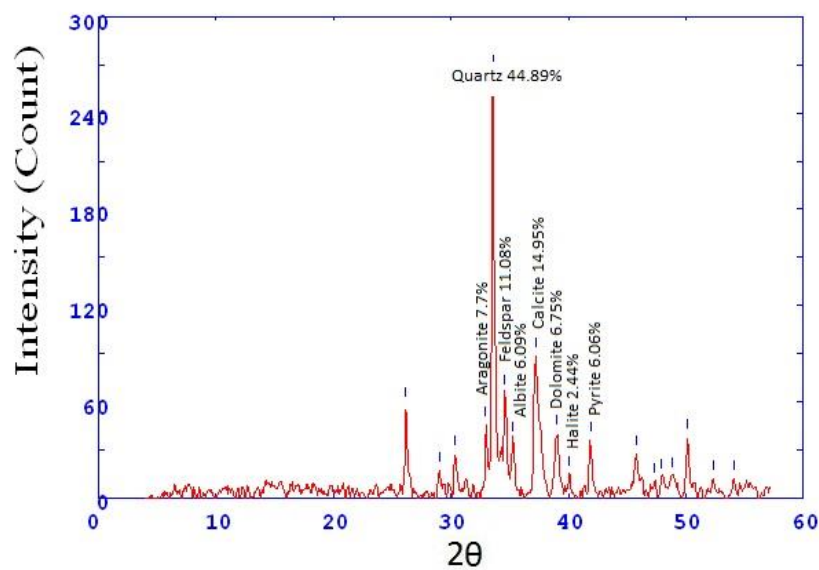

Fig.S14-9 X ray diffractogram of core 11 sample no.9

| 2Theta | d (A)   | Height | Area  | FWHM   | Identified mineral    | WT%         |
|--------|---------|--------|-------|--------|-----------------------|-------------|
| 14.569 | 7.63443 | 15.3   | 40.3  | 0.2568 | gypsum                | 2.32311     |
| 15.407 | 7.22146 | 11.7   | 30.8  | 0.2559 | -                     |             |
| 17.058 | 6.52712 | 25.3   | 66.2  | 0.2549 | -                     | 0           |
| 22.473 | 4.96771 | 8      | 53.1  | 0.4604 | -                     |             |
| 26.16  | 4.27743 | 84.7   | 249.3 | 0.2594 | gypsum                |             |
| 29.085 | 3.85519 | 13.1   | 38.5  | 0.2549 | -                     |             |
| 30.32  | 3.7016  | 23.8   | 49.9  | 0.2505 | -                     |             |
| 31.429 | 3.57404 | 9.7    | 20.3  | 0.2517 | -                     |             |
| 32.895 | 3.41893 | 35.1   | 73.5  | 0.2522 | Aragonite             | 5.329487    |
| 33.549 | 3.35414 | 218.4  | 605   | 0.2528 | quartz                | 33.16125    |
| 34.653 | 3.25035 | 72.8   | 201.6 | 0.3132 | feldspar (orthoclase) | 11.05375038 |
| 35.24  | 3.19796 | 37.1   | 102.8 | 0.3434 | feldspar , Albite     | 5.633161    |
| 37.177 | 3.03676 | 103.7  | 497.7 | 0.3736 | calcite               | 15.74552    |
| 38.953 | 2.90333 | 79.2   | 396.6 | 0.3926 | feldspar (orthoclase) |             |
| 40.027 | 2.82849 | 62.5   | 312.9 | 0.3362 | halite                | 9.489827    |
| 41.862 | 2.7097  | 29     | 109.6 | 0.2797 | pyrite                | 4.40328     |
| 45.693 | 2.49319 | 23.4   | 88.3  | 0.2806 | gypsum                |             |
| 46.308 | 2.46186 | 41.9   | 134.2 | 0.2814 | feldspar (orthoclase) |             |
| 48.084 | 2.37607 | 13.9   | 59.6  | 0.3432 | pyrite                |             |
| 48.624 | 2.35124 | 12.4   | 53.3  | 0.3252 | gypsum                |             |
| 50.167 | 2.2834  | 38.1   | 147.5 | 0.3071 | calcite               |             |
| 52.271 | 2.19758 | 20.2   | 85.8  | 0.4221 | gypsum                |             |
| 55.1   | 2.09292 | 13.4   | 120   | 0.6429 | calcite               |             |
| 57.905 | 1.99968 | 19.3   | 173.2 | 0.5592 | feldspar (orthoclase) |             |
| 58.467 | 1.98216 | 23.9   | 145.2 | 0.4755 | feldspar (orthoclase) |             |
| Total  |         | 658.6  |       |        |                       |             |

Table S11-10X ray diffraction data of core 11 sample no.10

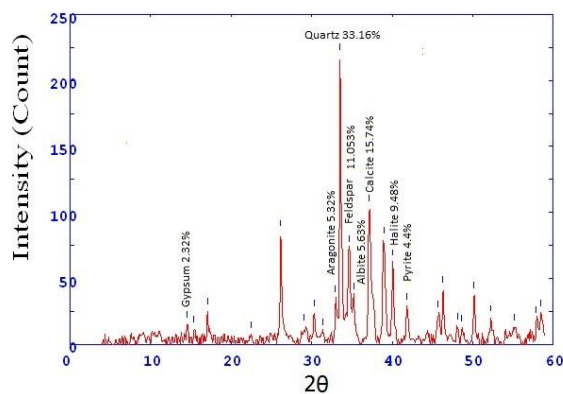

Fig.S14-10 X ray diffractogram of core 11 sample no.10

| 2Theta | d (A)    | Height | Area  | FWHM   | Identified mineral | WT%       |
|--------|----------|--------|-------|--------|--------------------|-----------|
| 6.57   | 16.89327 | 17.1   | 96    | 0.4417 | Montmorillonite    | 3.085528  |
| 15.768 | 7.05719  | 10.3   | 57.5  | 0.5417 | gypsum             | 1.8585348 |
| 23.664 | 4.72114  | 14     | 22.6  | 0.1632 | -                  |           |
| 25.122 | 4.45102  | 11.9   | 19.2  | 0.205  | -                  | 0         |
| 26.161 | 4.27723  | 85.9   | 172.9 | 0.2467 | gypsum             |           |
| 29.054 | 3.85916  | 14.4   | 28.9  | 0.2544 | calcite            |           |
| 30.316 | 3.70204  | 23.5   | 68.1  | 0.2621 | -                  |           |
| 32.986 | 3.40978  | 22     | 63.8  | 0.2519 | Aragonite          | 3.9696860 |
| 33.542 | 3.35481  | 265.6  | 727.6 | 0.2417 | quartz             | 47.924936 |
| 35.17  | 3.2041   | 24.5   | 67.1  | 0.3417 | feldspar (Albite)  | 4.4207867 |
| 37.167 | 3.03756  | 98.2   | 482.6 | 0.4418 | calcite            | 17.719234 |
| 39.01  | 2.89921  | 62.6   | 248.4 | 0.3787 | dolomite           | 11.295561 |
| 39.975 | 2.83198  | 28.7   | 114   | 0.4163 | halite             | 5.1786358 |
| 41.835 | 2.71137  | 25.2   | 135.5 | 0.4538 | pyrite             | 4.5470949 |
| 45.71  | 2.49235  | 28.4   | 146.6 | 0.416  | gypsum             |           |
| 48.101 | 2.37529  | 16.1   | 83    | 0.4093 | pyrite             |           |
| 48.887 | 2.33937  | 16.1   | 83    | 0.4026 | gypsum             |           |
| 50.11  | 2.28585  | 31.2   | 149.1 | 0.3892 | calcite            |           |
| 52.25  | 2.19839  | 16.8   | 69.8  | 0.3453 | gypsum             |           |
| Total  |          | 554.2  |       |        |                    |           |

Table S11-11X ray diffraction data of core 11 sample no.11

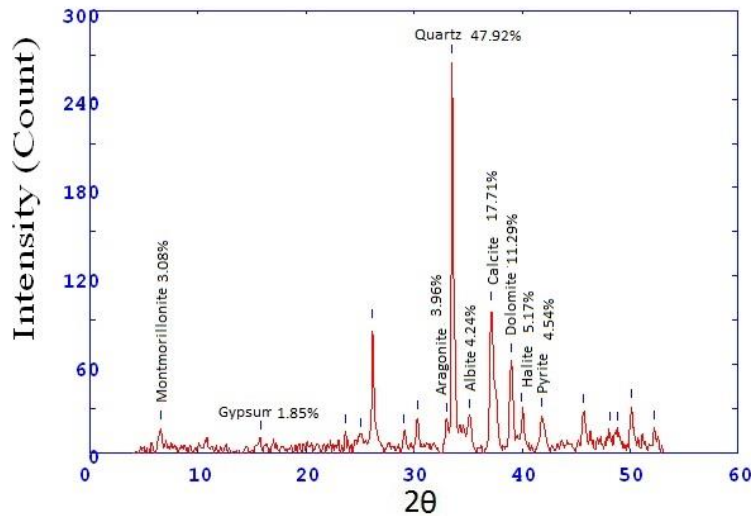

Fig.S14-11 X ray diffractogram of core 11 sample no.11



| 2Theta | d (Å)   | Height | Area  | FWHM   | Identified mineral    | WT%      |
|--------|---------|--------|-------|--------|-----------------------|----------|
| 26.225 | 4.26691 | 74.8   | 157.4 | 0.259  | -                     |          |
| 29.169 | 3.84427 | 9.1    | 19.2  | 0.2647 | calcite               | 0        |
| 30.4   | 3.69211 | 29.2   | 84.8  | 0.2704 | -                     |          |
| 31.241 | 3.5951  | 9.1    | 26.5  | 0.2668 | -                     |          |
| 32.981 | 3.41029 | 23.2   | 67.4  | 0.2633 | Aragonite             | 3.754653 |
| 33.611 | 3.34812 | 318.1  | 906.5 | 0.2561 | Quartz                | 51.48082 |
| 34.638 | 3.25178 | 42.4   | 120.7 | 0.3253 | feldspar (orthoclase) | 6.861952 |
| 35.301 | 3.19261 | 11.2   | 31.8  | 0.36   | feldspar (Albite )    | 1.812591 |
| 37.233 | 3.03231 | 109.1  | 544.6 | 0.3946 | calcite               | 17.65658 |
| 39.101 | 2.89275 | 66.8   | 450   | 0.4976 | Dolomite              | 10.81081 |
| 40.106 | 2.8231  | 23.2   | 156.5 | 0.4179 | halite                | 3.754653 |
| 41.9   | 2.70737 | 23.9   | 99.4  | 0.3382 | pyrite                | 3.86794  |
| 44.166 | 2.57484 | 6.1    | 25.5  | 0.3266 | -                     |          |
| 45.741 | 2.49074 | 19.2   | 79.9  | 0.315  | calcite               |          |
| 46.35  | 2.45977 | 28.8   | 101   | 0.2918 | -                     |          |
| 47.398 | 2.40842 | 8.1    | 28.5  | 0.3062 | -                     |          |
| 48.061 | 2.37713 | 7.1    | 25    | 0.3134 | pyrite                |          |
| 48.889 | 2.33926 | 5.1    | 17.9  | 0.317  | gypsum                |          |
| 50.248 | 2.27995 | 30.9   | 137.8 | 0.3206 | gypsum                |          |
| Total  |         | 617.9  |       |        |                       |          |

Table S11-12X ray diffraction data of core 11 sample no.12

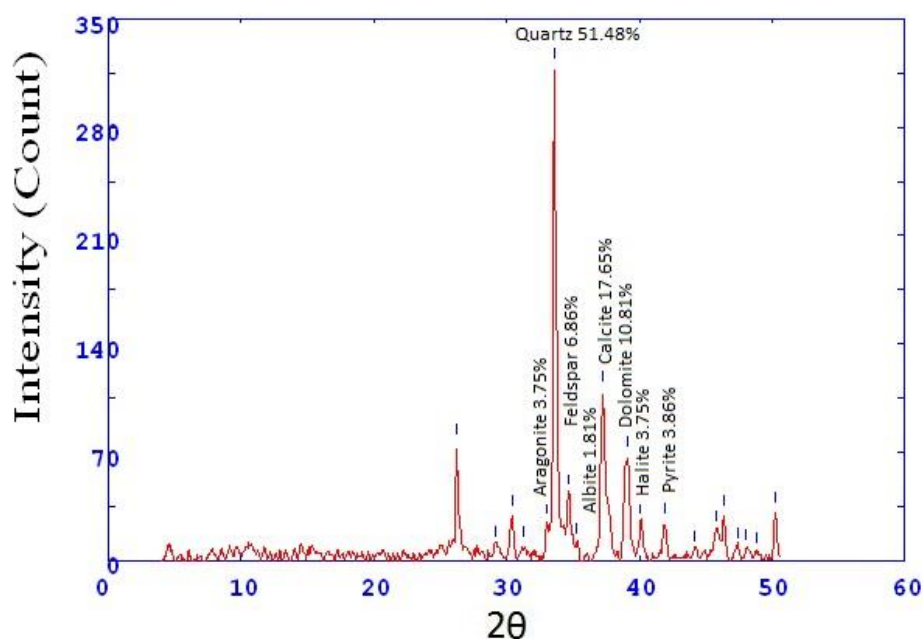

Fig.S14-12 X ray diffractogram of core 11 sample no.12

| 2Theta | d (A)   | Height | Area  | FWHM   | Identified mineral | WT%         |
|--------|---------|--------|-------|--------|--------------------|-------------|
| 12.975 | 8.50772 | 40.1   | 1397  | 0.3309 | Illite             | 6.78625825  |
| 14.434 | 7.67568 | 326.8  | 1397  | 0.3309 | Gypsum             | 55.30546624 |
| 25.953 | 4.31094 | 63.8   | 328.6 | 0.412  | Gypsum             |             |
| 29.344 | 3.82189 | 80.3   | 242.9 | 0.2732 | gypsum             |             |
| 32.85  | 3.42345 | 34.9   | 105.7 | 0.2686 | -                  |             |
| 33.472 | 3.33165 | 71.8   | 207.9 | 0.264  | Quartz             | 12.15095617 |
| 34.307 | 3.28221 | 17.5   | 50.7  | 0.5412 | feldspar           | 2.961584024 |
| 35.42  | 3.18217 | 9.3    | 26.9  | 0.6799 | feldspar( Albite ) | 1.573870367 |
| 36.678 | 3.07663 | 66     | 727.3 | 0.8185 | Gypsum             |             |
| 37.134 | 3.03016 | 62.6   | 689.7 | 0.6471 | Calcite            | 10.59400914 |
| 39.221 | 2.88423 | 27     | 159.7 | 0.4758 | dolomite           | 4.569301066 |
| 39.789 | 2.84467 | 18.5   | 109.5 | 0.5747 | dolomite           |             |
| 42.085 | 2.69597 | 35.8   | 339.1 | 0.6736 | pyrite             | 6.058554747 |
| Total  |         | 590.9  |       |        |                    |             |

Table S12-1 X ray diffraction data of core 12 sample no.1

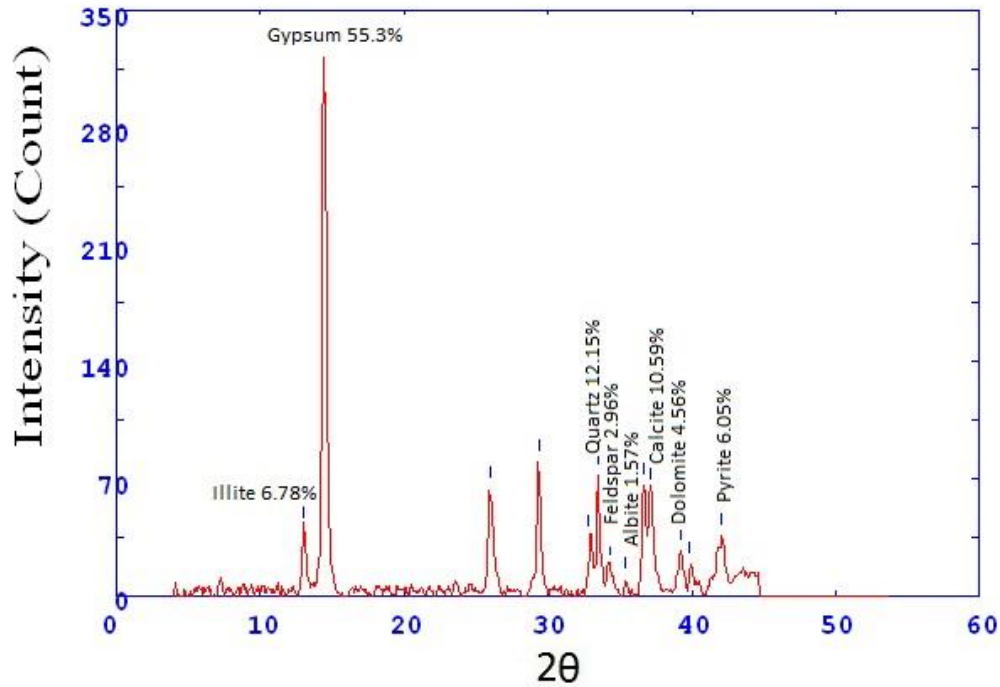

Fig.S15-1 X ray diffractogram of core 12 sample no.1

| 2Theta | d (A)   | Height | Area   | FWHM   | Identified mineral | WT%         |
|--------|---------|--------|--------|--------|--------------------|-------------|
| 13.249 | 8.39123 | 41.4   | 1689.8 | 0.3565 | Illite             | 6.461682535 |
| 14.633 | 7.601   | 331.7  | 1689.8 | 0.3565 | Gypsum             | 51.77149992 |
| 26.156 | 4.278   | 75.1   | 304    | 0.3578 | Gypsum             |             |
| 29.53  | 3.79827 | 91.1   | 270.9  | 0.2799 | Gypsum             |             |
| 33.104 | 3.39795 | 75     | 359.2  | 0.3984 | Aragonite          | 11.70594662 |
| 33.645 | 3.3448  | 50.7   | 242.9  | 0.3812 | Quartz             | 7.913219916 |
| 34.48  | 3.26622 | 41.4   | 198.4  | 0.3726 | feldspar           | 6.461682535 |
| 36.826 | 3.06465 | 66     | 264.3  | 0.364  | Gypsum             |             |
| 37.354 | 3.02288 | 35.2   | 140.9  | 0.3218 | Calcite            | 5.493990947 |
| 39.414 | 2.87071 | 26.9   | 79.3   | 0.2796 | dolomite           | 4.198532855 |
| 41.993 | 2.70163 | 38.4   | 294.6  | 0.6176 | Pyrite             | 2.107070392 |
| 43.751 | 2.59808 | 13.5   | 103.6  | 0.5926 | Quartz             |             |
| 45.866 | 2.48429 | 33.3   | 262.5  | 0.5675 | Aragonite          |             |
| 48.108 | 2.37493 | 20.7   | 163.6  | 0.5059 | Aragonite          |             |
| 48.862 | 2.3405  | 26.4   | 140.4  | 0.4444 | Aragonite          |             |
| 51.724 | 2.21918 | 11.4   | 60.8   | 0.4041 | Gypsum             |             |
| 52.451 | 2.19058 | 13.5   | 75.2   | 0.3638 | Gypsum             |             |
| 54.733 | 2.10584 | 19.9   | 113.8  | 0.4712 | Aragonite          |             |
| Total  |         | 640.7  |        |        |                    |             |

Table S12-2 X ray diffraction data of core 12 sample no.2

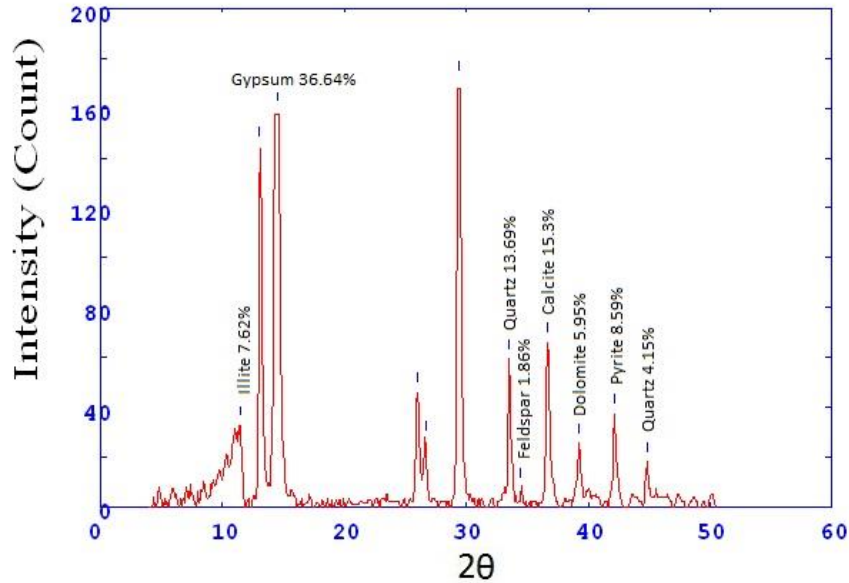

Fig.S15-2 X ray diffractogram of core 12 sample no.2

| 2Theta | d (A)   | Height | Area   | FWHM   | Identified mineral    | WT%         |
|--------|---------|--------|--------|--------|-----------------------|-------------|
| 13.22  | 8.40944 | 32.3   | 1019.3 | 0.28   | Illite                | 4.594594595 |
| 14.598 | 7.61946 | 326.4  | 1019.3 | 0.28   | Gypsum                | 46.42958748 |
| 23.634 | 4.72692 | 13.1   | 53.5   | 0.3608 | -                     |             |
| 26.146 | 4.27965 | 62.6   | 248.4  | 0.3395 | Gypsum                |             |
| 29.513 | 3.8004  | 55     | 205.6  | 0.2971 | Gypsum                |             |
| 33.045 | 3.40387 | 78     | 291.8  | 0.2839 | Aragonite             | 11.09530583 |
| 33.699 | 3.33965 | 117.7  | 336.1  | 0.2707 | Quartz                | 16.74253201 |
| 34.389 | 3.27462 | 44.8   | 127.8  | 0.2983 | feldspar (orthoclase) | 6.372688478 |
| 36.829 | 3.06445 | 58     | 234    | 0.3259 | Gypsum                |             |
| 37.329 | 3.02484 | 27.1   | 109.3  | 0.3217 | Calcite               | 3.854907539 |
| 39.394 | 2.8721  | 29.8   | 92.1   | 0.3175 | dolomite              | 4.238975818 |
| 41.958 | 2.70379 | 46.9   | 311.4  | 0.5299 | pyrite                | 6.67140825  |
| 42.369 | 2.67874 | 33.3   | 221.4  | 0.5348 | Gypsum                |             |
| 45.767 | 2.48941 | 30     | 194    | 0.5397 | Quartz ,Aragonite     |             |
| 48.142 | 2.37338 | 29.8   | 167.6  | 0.4552 | Aragonite             |             |
| 48.837 | 2.34162 | 26.1   | 0      | 0      | anhydrite             |             |
| Total  |         | 703    |        |        |                       |             |

Table S12-3 X ray diffraction data of core 12 sample no.3

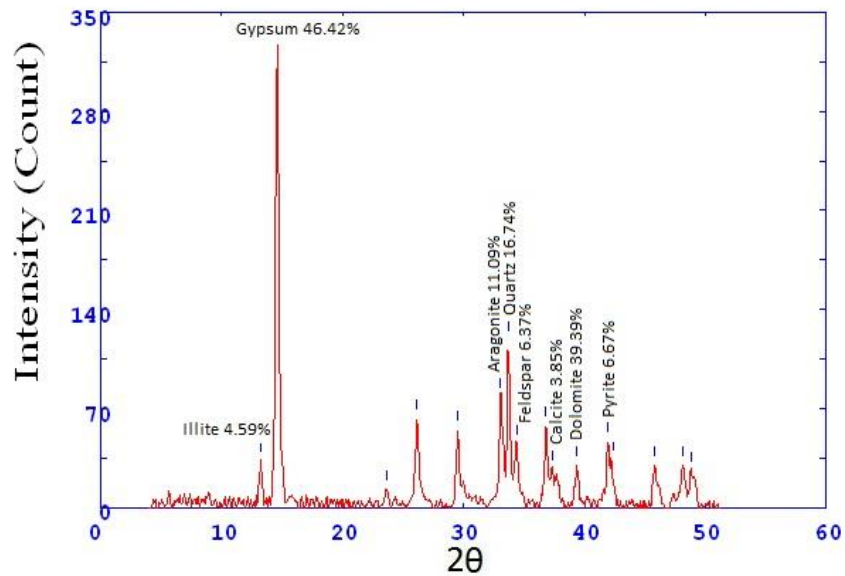

Fig.S15-3 X ray diffractogram of core 12 sample no.3

| 2Theta | d (A)   | Height | Area   | FWHM   | Identified mineral    | WT%         |
|--------|---------|--------|--------|--------|-----------------------|-------------|
| 12.973 | 8.56908 | 16.3   | 37.6   | 0.273  | Illite                | 2.788708298 |
| 15.662 | 7.14458 | 10.9   | 37.6   | 0.273  | Gypsum                | 1.864841745 |
| 26.213 | 4.26888 | 68.2   | 182    | 0.2559 | Gypsum                |             |
| 27.72  | 4.04102 | 39     | 76.1   | 0.2294 | -                     |             |
| 30.387 | 3.69362 | 36.7   | 113.5  | 0.2593 | dolomite              |             |
| 31.379 | 3.57967 | 12     | 37.1   | 0.2708 | feldspar              |             |
| 32.976 | 3.41079 | 26     | 80.5   | 0.2765 | Aragonite             |             |
| 33.603 | 3.34886 | 339.4  | 1126.7 | 0.2823 | Quartz                | 58.0667237  |
| 34.572 | 3.25774 | 34.7   | 115    | 0.2814 | feldspar (orthoclase) | 5.936698033 |
| 35.329 | 3.19014 | 12     | 39.7   | 0.281  | feldspar (Albite)     |             |
| 37.212 | 3.03397 | 83.9   | 244.8  | 0.2806 | calcite               | 14.35414885 |
| 39.086 | 2.89381 | 59.8   | 297.9  | 0.3958 | dolomite              | 10.23096664 |
| 40.119 | 2.82222 | 17.4   | 86.5   | 0.3375 | halite                | 2.976903336 |
| 41.88  | 2.70858 | 22.1   | 71.7   | 0.2791 | pyrite                | 3.78100941  |
| 43.986 | 2.58491 | 9.8    | 31.8   | 0.344  | feldspar (orthoclase) |             |
| 45.7   | 2.49284 | 20     | 104    | 0.4088 | Quartz                |             |
| 47.179 | 2.41894 | 9.8    | 51     | 0.296  | Aragonite             |             |
| 48.026 | 2.37876 | 12.7   | 20     | 0.1832 | pyrite                |             |
| 50.157 | 2.28382 | 31.4   | 98.6   | 0.2687 | Quartz                |             |
| Total  |         | 584.5  |        |        |                       |             |

Table S12-4 X ray diffraction data of core 12 sample no.4

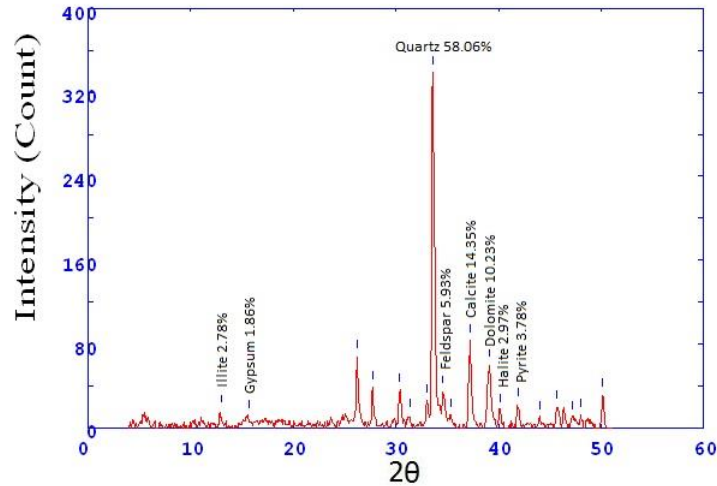

Fig.S15-4 X ray diffractogram of core 12 sample no.4

| 2Theta | d (A)   | Height | Area  | FWHM   | Identified mineral    | WT%         |
|--------|---------|--------|-------|--------|-----------------------|-------------|
| 13.223 | 8.40755 | 77.2   | 1993  | 0.4373 | Illite                | 10.49055578 |
| 14.7   | 7.56674 | 348.8  | 1993  | 0.4373 | gypsum                | 47.39774426 |
| 23.675 | 4.71894 | 11.9   | 30    | 0.291  | -                     |             |
| 26.158 | 4.27775 | 87.4   | 358.4 | 0.3694 | gypsum                |             |
| 26.746 | 4.18531 | 19.4   | 79.4  | 0.3169 | Geothite              | 2.636227748 |
| 29.534 | 3.79782 | 163.3  | 473.3 | 0.2645 | gypsum                |             |
| 33.08  | 3.40036 | 51.5   | 149.2 | 0.2733 | anhydrite             |             |
| 33.681 | 3.34138 | 56.7   | 160.1 | 0.2821 | Quartz                | 7.704851203 |
| 34.363 | 3.27694 | 25.8   | 72.8  | 0.3164 | feldspar (orthoclase) | 3.505911129 |
| 35.476 | 3.17732 | 8.7    | 24.4  | 0.3336 | feldspar (Albite)     |             |
| 36.869 | 3.06122 | 102.4  | 401.8 | 0.3507 | calcite               | 13.91493409 |
| 37.445 | 3.01581 | 47.2   | 185.3 | 0.3975 | Calcite               |             |
| 39.4   | 2.87163 | 36.6   | 212.7 | 0.4442 | feldspar (orthoclase) | 4.973501834 |
| 40.269 | 2.81216 | 15.1   | 87.7  | 0.5333 | halite                | 2.051909227 |
| 42.262 | 2.68521 | 39     | 306.7 | 0.6223 | pyrite                | 5.299633102 |
| 43.778 | 2.59654 | 5.4    | 42.8  | 0.5143 | gypsum                |             |
| 45.867 | 2.48427 | 27     | 140   | 0.4063 | anhydrite             |             |
| 47.373 | 2.40962 | 6.5    | 33.8  | 0.3732 | Gypsum                |             |
| 48.138 | 2.37354 | 20     | 84    | 0.34   | pyrite                |             |
| 48.914 | 2.33817 | 10.8   | 45.3  | 0.3467 | gypsum                |             |
| 51.8   | 2.21615 | 14     | 60    | 0.3533 | gypsum                |             |
| Total  |         | 735.9  |       |        |                       |             |

Table S12-5 X ray diffraction data of core 12 sample no.5

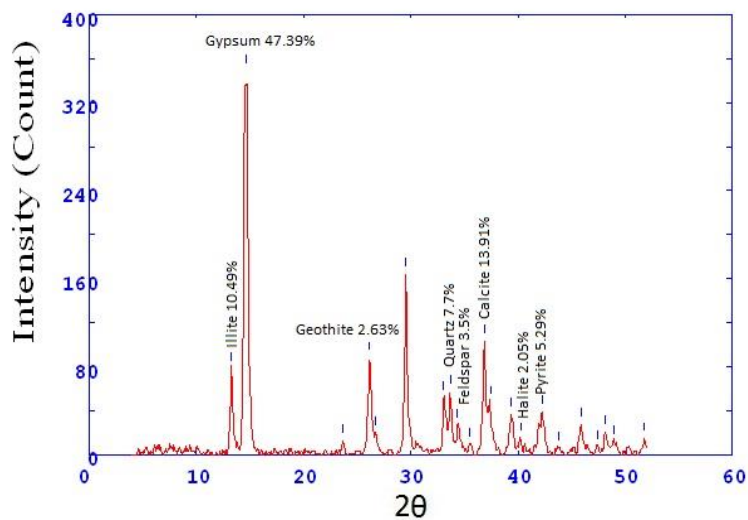

Fig.S15-5 X ray diffractogram of core 12 sample no.5

| 2Theta | d (A)   | Height | Area  | FWHM   | Identified mineral    | WT%         |
|--------|---------|--------|-------|--------|-----------------------|-------------|
| 14.572 | 7.63263 | 49.6   | 96.1  | 0.2098 | Gypsum                | 9.53479431  |
| 26.211 | 4.26917 | 40.2   | 113.7 | 0.257  | gypsum                | 0           |
| 28.471 | 3.9365  | 5.3    | 15.1  | 0.3687 | -                     |             |
| 29.216 | 3.83826 | 11.2   | 31.7  | 0.4245 | gypsum                |             |
| 29.766 | 3.76882 | 20     | 127.1 | 0.4804 | Gypsum                |             |
| 30.374 | 3.69514 | 16     | 101.3 | 0.3646 | dolomite              |             |
| 33.022 | 3.40615 | 89.2   | 566.3 | 0.3068 | Aragonite             | 17.14725106 |
| 33.582 | 3.35088 | 168.8  | 361.8 | 0.2489 | Quartz                | 32.44905805 |
| 34.263 | 3.28627 | 46.2   | 99    | 0.4042 | feldspar (orthoclase) | 8.881199539 |
| 35.173 | 3.20382 | 4.8    | 10.3  | 0.4819 | feldspar (Albite)     |             |
| 37.151 | 3.03878 | 34.8   | 243.1 | 0.5596 | calcite               | 6.689734717 |
| 39.062 | 2.89553 | 37.7   | 263.6 | 0.4389 | dolomite              | 7.247212611 |
| 40.086 | 2.82448 | 40     | 157.2 | 0.3181 | halite                | 7.247212611 |
| 41.9   | 2.70735 | 53.9   | 177.3 | 0.3157 | pyrite                | 10.36139946 |
| 43.613 | 2.60592 | 5.9    | 19.4  | 0.3504 | -                     |             |
| 45.796 | 2.48788 | 37     | 160   | 0.3852 | gypsum                |             |
| 46.26  | 2.46428 | 16.5   | 71.3  | 0.3651 | Aragonite             |             |
| 47.336 | 2.4114  | 18.6   | 80.5  | 0.3451 | Aragonite             |             |
| 48.033 | 2.37841 | 37     | 145.3 | 0.3049 | pyrite                |             |
| 48.825 | 2.34215 | 25     | 0     | 0      | gypsum                |             |
| Total  |         | 520.2  |       |        |                       |             |

Table S12-6 X ray diffraction data of core 12 sample no.6

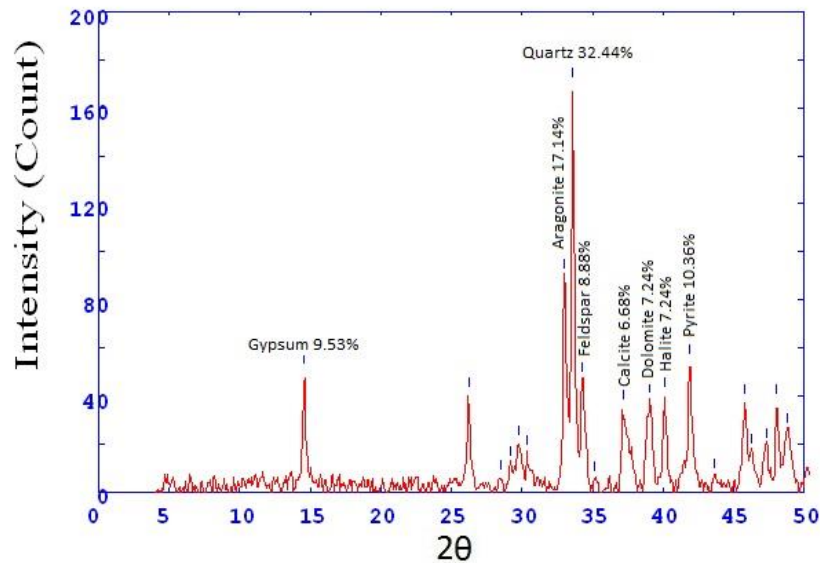

Fig.S15-6 X ray diffractogram of core 12 sample no.6

| 2Theta | d (A)   | Height | Area   | FWHM   | Identified mineral    | WT%         |
|--------|---------|--------|--------|--------|-----------------------|-------------|
| 26.233 | 4.26562 | 36.5   | 108    | 0.2689 | -                     | 0           |
| 30.393 | 3.69288 | 37     | 104.8  | 0.2492 | dolomite              |             |
| 33.014 | 3.40694 | 57.4   | 162.8  | 0.2472 | Aragonite             |             |
| 33.6   | 3.34922 | 346.3  | 1019.9 | 0.2453 | Quartz                | 62.75824574 |
| 34.364 | 3.27686 | 27.7   | 81.4   | 0.5125 | feldspar (orthoclase) | 5.019934759 |
| 35.293 | 3.19329 | 11.1   | 32.7   | 0.6462 | feldspar (Albite)     | 2.011598405 |
| 37.269 | 3.02949 | 68.5   | 759.2  | 0.7798 | calcite               | 12.41391809 |
| 39.006 | 2.89948 | 27.7   | 306.7  | 0.5521 | dolomite              | 5.019934759 |
| 40.188 | 2.8176  | 15.5   | 172.2  | 0.4382 | halite                | 2.808988764 |
| 41.93  | 2.70551 | 55     | 207.8  | 0.3243 | pyrite                | 9.967379485 |
| 45.793 | 2.48803 | 34.7   | 257.6  | 0.5446 | -                     |             |
| 47.278 | 2.41419 | 15.5   | 115.2  | 0.4879 | Aragonite             |             |
| 48.05  | 2.37764 | 24.7   | 136.1  | 0.4313 | pyrite                |             |
| 48.797 | 2.34341 | 21     | 115.8  | 0.2156 | Aragonite             |             |
| 50.316 | 2.27706 | 15.5   | 0      | 0      | -                     |             |
| Total  |         | 551.8  |        |        |                       |             |

Table S12-7 X ray diffraction data of core 12 sample no.7

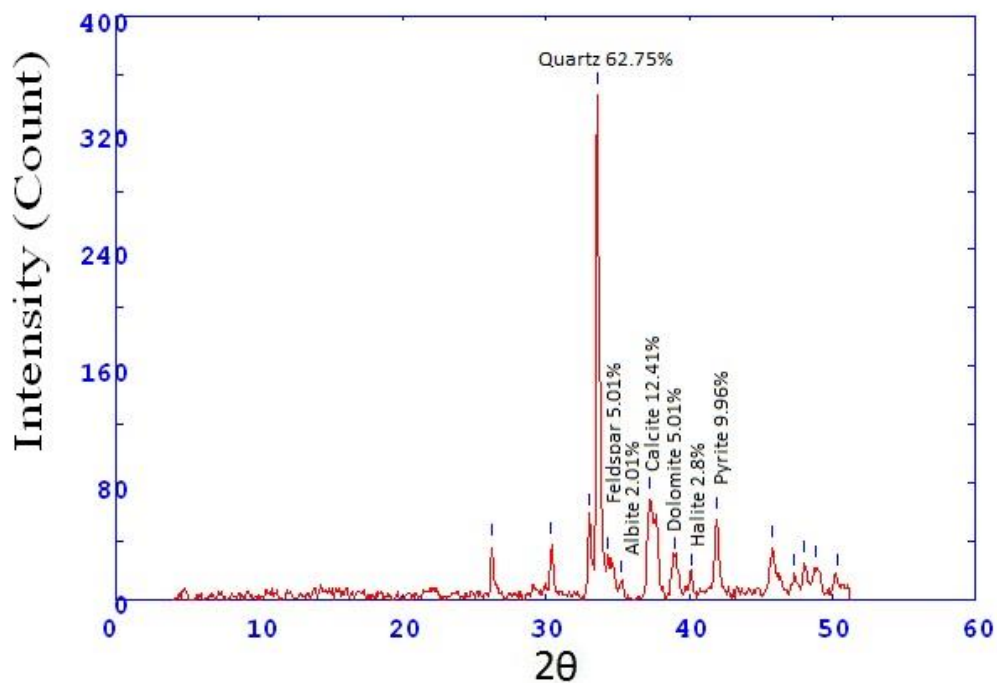

Fig.S15-7 X ray diffractogram of core 12 sample no.7



| 2Theta | d (Å)   | Height | Area   | FWHM   | Identified mineral   | WT%         |
|--------|---------|--------|--------|--------|----------------------|-------------|
| 23.767 | 4.70096 | 15.4   | 30.7   | 0.189  | -                    |             |
| 26.236 | 4.26528 | 95.3   | 205.3  | 0.2405 | -                    |             |
| 29.135 | 3.84865 | 10.5   | 22.6   | 0.2464 | -                    |             |
| 30.4   | 3.69209 | 78.9   | 219.2  | 0.2523 | dolomite             |             |
| 32.892 | 3.41921 | 36.5   | 101.4  | 0.2985 | Aragonite            | 5.916680175 |
| 33.567 | 3.35241 | 347    | 1471.6 | 0.3447 | Quartz               | 56.24898687 |
| 34.689 | 3.24714 | 38.5   | 163.5  | 0.3662 | feldspar(orthoclase) | 6.240881828 |
| 35.261 | 3.19612 | 31.3   | 132.6  | 0.377  | feldspar (Albite)    | 5.073755876 |
| 37.242 | 3.0316  | 94.5   | 424.6  | 0.3878 | calcite              | 15.31852812 |
| 39.11  | 2.89208 | 21.7   | 128.1  | 0.4701 | dolomite             | 3.51758794  |
| 40.079 | 2.82494 | 17.8   | 104.7  | 0.3671 | halite               | 2.885394716 |
| 41.913 | 2.70657 | 29.6   | 89.4   | 0.2641 | pyrite               | 4.798184471 |
| 45.633 | 2.49631 | 24     | 72.5   | 0.3654 | Aragonite            |             |
| 46.333 | 2.46061 | 28     | 142.3  | 0.4667 | Aragonite            |             |
| 48.852 | 2.34092 | 16.2   | 126.7  | 0.5917 | gypsum               |             |
| Total  |         | 616.9  |        |        |                      |             |

Table S12-8 X ray diffraction data of core 12 sample no.8

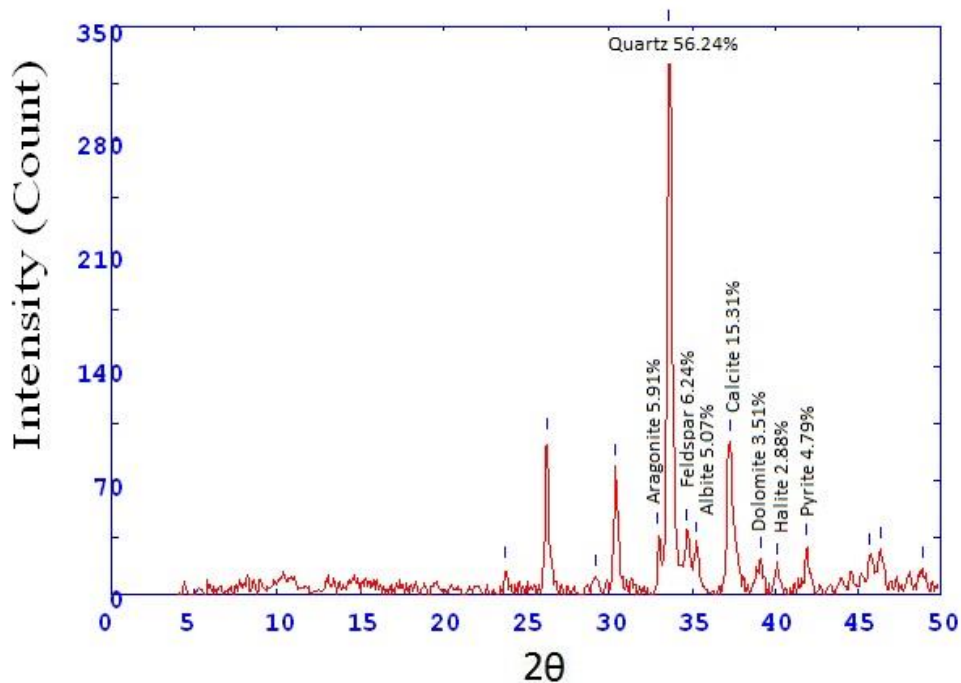

Fig.S15-8 X ray diffractogram of core 12 sample no.8

| 2Theta | d (A)   | Height | Area  | FWHM   | Identified mineral   | WT%         |
|--------|---------|--------|-------|--------|----------------------|-------------|
| 26.273 | 4.25936 | 124.3  | 335.1 | 0.2414 | -                    |             |
| 29.103 | 3.85288 | 9      | 24.2  | 0.2596 | -                    |             |
| 30.433 | 3.68813 | 32.2   | 103.4 | 0.2778 | dolomite             |             |
| 31.328 | 3.58537 | 7      | 22.5  | 0.2766 | -                    |             |
| 33.089 | 3.39942 | 33.7   | 108.2 | 0.2753 | Aragonite            |             |
| 33.64  | 3.34533 | 318.5  | 947   | 0.2728 | Quartz               | 39.01273885 |
| 34.758 | 3.24088 | 119.9  | 356.4 | 0.3201 | feldspar(orthoclase) | 14.68642822 |
| 35.314 | 3.19142 | 24.8   | 73.8  | 0.3438 | feldspar             | 3.037726605 |
| 37.271 | 3.02933 | 122.4  | 615.8 | 0.3674 | calcite              | 14.99265066 |
| 39.034 | 2.89748 | 28.3   | 196.2 | 0.4591 | dolomite             | 3.466438021 |
| 40.228 | 2.81493 | 13     | 89.6  | 0.4009 | halite               | 1.592356688 |
| 41.954 | 2.70403 | 29.5   | 130.4 | 0.3427 | pyrite               | 3.613424792 |
| 45.698 | 2.49295 | 23.8   | 105.5 | 0.3124 | Aragonite            |             |
| 46.399 | 2.45731 | 26.4   | 105.7 | 0.2821 | dolomite             |             |
| 47.367 | 2.40992 | 10     | 40    | 0.3052 | -                    |             |
| 48.108 | 2.37493 | 11     | 43.9  | 0.3167 | pyrite               |             |
| 48.85  | 2.34103 | 12     | 47.9  | 0.3224 | gypsum               |             |
| 50.267 | 2.27914 | 34.9   | 157.9 | 0.3282 | pyrite               |             |
| 51.261 | 2.23788 | 11     | 49.6  | 0.3824 | pyrite               |             |
| 52.373 | 2.19359 | 10     | 45.2  | 0.4094 | gypsum               |             |
| 54.166 | 2.1262  | 27.2   | 181.4 | 0.4365 | Aragonite            |             |
| Total  |         | 816.4  |       |        |                      |             |

Table S12-9 X ray diffraction data of core 12 sample no.9

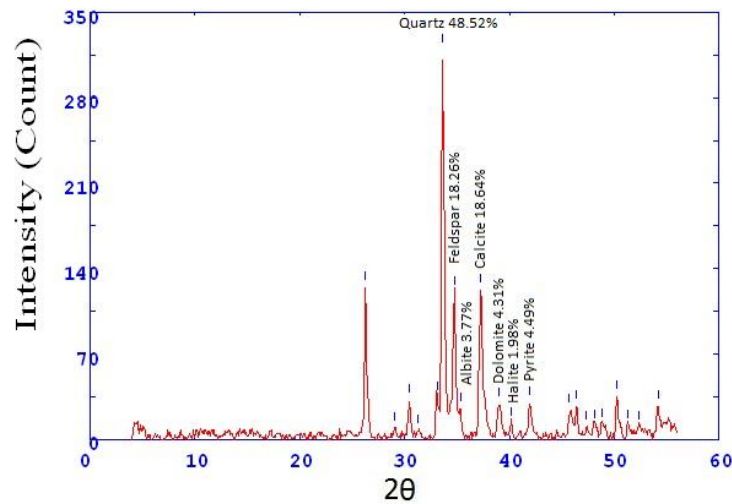

Fig.S15-9 X ray diffractogram of core 12 sample no.9

| 2Theta | d (A)   | Height | Area   | FWHM   | Identified mineral    | WT%         |
|--------|---------|--------|--------|--------|-----------------------|-------------|
| 23.8   | 4.69453 | 13.1   | 21.7   | 0.2221 | -                     |             |
| 26.252 | 4.26269 | 111.7  | 252.5  | 0.2582 | gypsum                | 0           |
| 30.426 | 3.689   | 45.3   | 137.8  | 0.2576 | dolomite              |             |
| 33.029 | 3.40546 | 30.9   | 94     | 0.2794 | Aragonite             | 4.556850022 |
| 33.633 | 3.34596 | 359.2  | 1390.3 | 0.3011 | Quartz                | 52.97153812 |
| 34.743 | 3.24225 | 37.5   | 145    | 0.3237 | feldspar (orthoclase) | 5.530157794 |
| 35.333 | 3.18975 | 91     | 369.5  | 0.3464 | feldspar (Albite)     | 13.41984958 |
| 37.259 | 3.03033 | 68.5   | 360.7  | 0.3821 | calcite               | 10.1017549  |
| 39.034 | 2.89751 | 37.2   | 238.1  | 0.471  | dolomite              | 5.485916531 |
| 40.066 | 2.82585 | 14.4   | 92     | 0.4066 | halite                | 2.123580593 |
| 41.951 | 2.70423 | 22.8   | 104.2  | 0.3422 | pyrite                | 3.362335939 |
| 45.749 | 2.49029 | 16.6   | 75.9   | 0.308  | Aragonite             | 3.362335939 |
| 46.381 | 2.45822 | 48.3   | 151.6  | 0.2738 | Aragonite             |             |
| 47.193 | 2.41828 | 8.9    | 27.9   | 0.2837 | gypsum                |             |
| 48.005 | 2.37974 | 10     | 31.3   | 0.2887 | gypsum                |             |
| 50.176 | 2.283   | 34.8   | 134.2  | 0.2937 | Aragonite             |             |
| 51.253 | 2.23819 | 6.7    | 25.8   | 0.2965 | pyrite                |             |
| 54.109 | 2.12826 | 28.4   | 94.5   | 0.2993 | Aragonite             |             |
| Total  |         | 678.1  |        |        |                       |             |

Table S12-10 X ray diffraction data of core 12 sample no.10

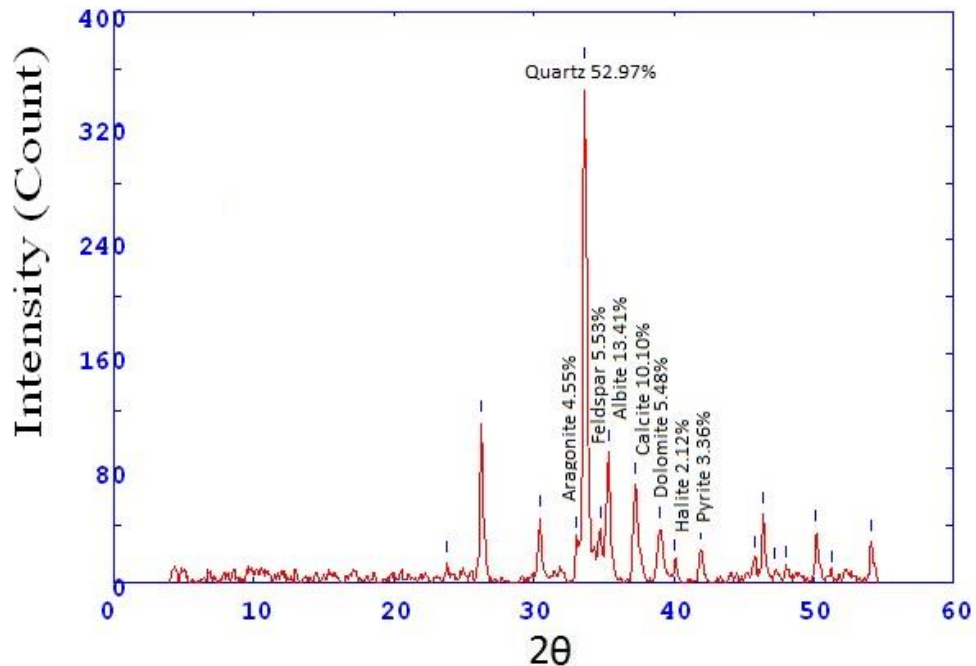

Fig.S15-10 X ray diffractogram of core 12 sample no.10

| 2Theta | d (A)   | Height | Area   | FWHM   | Identified mineral    | WT%         |
|--------|---------|--------|--------|--------|-----------------------|-------------|
| 13.099 | 8.48713 | 92.9   | 1562.9 | 0.3663 | Illite                | 13.18852924 |
| 14.504 | 7.66869 | 324.1  | 1562.9 | 0.3663 | Gypsum                | 46.01078932 |
| 25.992 | 4.26456 | 39.4   | 147.3  | 0.3496 | gypsum                |             |
| 29.378 | 3.81753 | 78.9   | 170.4  | 0.2584 | gypsum                |             |
| 32.814 | 3.42716 | 47.5   | 102.6  | 0.2562 | aragonite             | 11.20102215 |
| 33.548 | 3.34424 | 89.7   | 258    | 0.2539 | Quartz                | 12.73424191 |
| 34.21  | 3.29119 | 24.8   | 71.4   | 0.3554 | feldspar (orthoclase) | 3.52072686  |
| 36.592 | 3.08356 | 34.1   | 98.1   | 0.4061 | gypsum                |             |
| 37.198 | 3.03507 | 62.3   | 307.4  | 0.4569 | calcite               | 4.840999432 |
| 39.25  | 2.88219 | 20.7   | 224.3  | 0.78   | dolomite              | 2.93867121  |
| 39.878 | 2.83859 | 12.5   | 135.1  | 0.7039 | Halite                | 1.774559909 |
| 41.875 | 2.70886 | 29.9   | 251.9  | 0.6278 | pyrite                | 4.244747303 |
| 45.687 | 2.49353 | 28.5   | 121.3  | 0.3778 | gypsum                |             |
| 47.107 | 2.42244 | 14.5   | 61.9   | 0.3944 | Aragonite             |             |
| 48.075 | 2.37647 | 20.1   | 94     | 0.4111 | Aragonite             |             |
| 48.75  | 2.34554 | 15.5   | 0      | 0      | Aragonite             |             |
| Total  |         | 704.5  |        |        |                       |             |

Table S12-11 X ray diffraction data of core 12 sample no.11

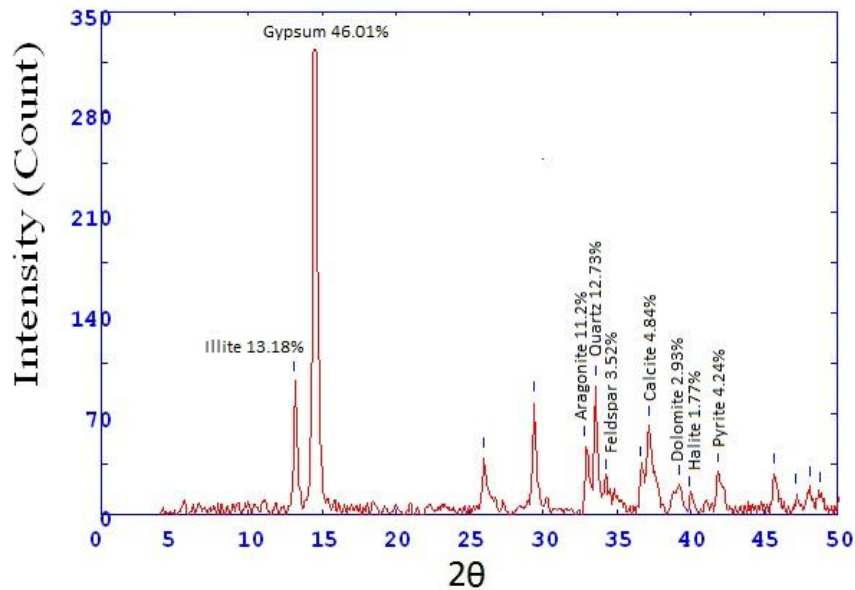

Fig.S15-11 X ray diffractogram of core 12 sample no.11

| 2Theta | d (A)   | Height | Area  | FWHM   | Identified mineral    | WT%         |
|--------|---------|--------|-------|--------|-----------------------|-------------|
| 13.115 | 8.47674 | 56.2   | 1615  | 0.376  | Illite                | 8.27565896  |
| 14.567 | 7.63559 | 347.8  | 1615  | 0.376  | gypsum                | 51.21484317 |
| 24.922 | 4.48631 | 7.6    | 35.5  | 0.3659 | -                     |             |
| 26.025 | 4.29922 | 68.6   | 280.9 | 0.3558 | gypsum                |             |
| 29.42  | 3.8122  | 120.6  | 337.9 | 0.2577 | gypsum                |             |
| 32.937 | 3.41472 | 58.4   | 163.6 | 0.2587 | aragonite             | 8.59961714  |
| 33.587 | 3.35048 | 71.4   | 200.9 | 0.2597 | Quartz                | 10.51391548 |
| 34.229 | 3.2894  | 32.5   | 91.5  | 0.2879 | feldspar (orthoclase) | 4.78574584  |
| 36.752 | 3.07062 | 82.9   | 254.8 | 0.3161 | gypsum                |             |
| 37.16  | 3.03812 | 45.4   | 139.7 | 0.3377 | calcite               | 6.685318804 |
| 39.291 | 2.87933 | 33.5   | 142.1 | 0.3592 | dolomite              | 4.932999558 |
| 41.913 | 2.70654 | 33.9   | 332.4 | 0.6817 | pyrite                | 4.991901046 |
| 45.767 | 2.48941 | 30.4   | 177.6 | 0.4676 | gypsum                |             |
| 47.243 | 2.41587 | 8.7    | 51    | 0.4096 | aragonite             |             |
| 48.024 | 2.37886 | 22.9   | 100.9 | 0.3517 | aragonite             |             |
| 48.794 | 2.34355 | 19.5   | 0     | 0      | Aragonite             |             |
| 51.724 | 2.21917 | 8.7    | 0     | 0      | pyrite                |             |
| Total  |         | 679.1  |       |        |                       |             |

Table S12-12 X ray diffraction data of core 12 sample no.12

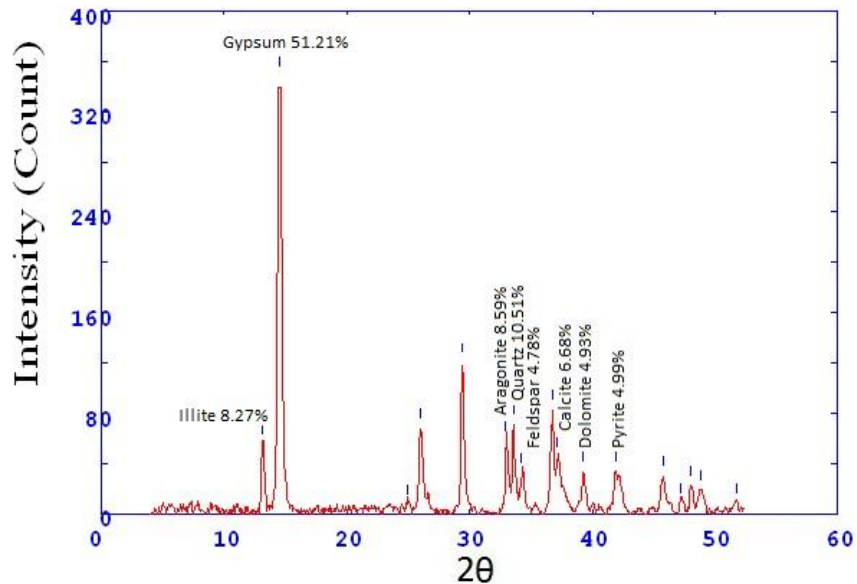

Fig.S15-12 X ray diffractogram of core 12 sample no.12

| 2Theta | d (A)   | Height | Area  | FWHM   | Identified mineral    | WT%         |
|--------|---------|--------|-------|--------|-----------------------|-------------|
| 13.078 | 8.50054 | 7.4    | 167   | 0.2466 | Illite                | 0.980781975 |
| 14.516 | 7.66224 | 78.7   | 167   | 0.2466 | gypsum                | 10.43074884 |
| 15.352 | 7.24701 | 10.8   | 22.9  | 0.2456 | -                     |             |
| 24.976 | 4.47667 | 9.4    | 20.1  | 0.2451 | -                     |             |
| 26.196 | 4.27166 | 48.8   | 99.4  | 0.2446 | gypsum                |             |
| 29.088 | 3.85475 | 14.1   | 28.8  | 0.2321 | -                     |             |
| 29.438 | 3.80992 | 14.1   | 28.8  | 0.2258 | -                     |             |
| 30.316 | 3.70203 | 17.8   | 36    | 0.2195 | -                     |             |
| 32.15  | 3.49596 | 14.8   | 30    | 0.2366 | anhydrite             | 1.96156395  |
| 32.938 | 3.41462 | 28.2   | 57.2  | 0.2452 | Aragonite             | 3.737574553 |
| 33.543 | 3.35475 | 211.7  | 597.2 | 0.2537 | quartz                | 28.05831677 |
| 34.25  | 3.28748 | 20.2   | 56.9  | 0.239  | feldspar (orthoclase) | 2.677269715 |
| 35.268 | 3.19543 | 168.1  | 341.5 | 0.2244 | feldspar (Albite)     | 22.2796554  |
| 37.197 | 3.03514 | 124    | 577.2 | 0.344  | calcite               | 16.43472498 |
| 38.99  | 2.90066 | 53.6   | 382.3 | 0.5219 | dolomite              | 7.104042412 |
| 39.937 | 2.83461 | 20.2   | 144.1 | 0.4376 | halite                | 2.677269715 |
| 41.249 | 2.74817 | 7.4    | 53.1  | 0.3954 |                       |             |
| 41.846 | 2.71067 | 27.6   | 111.9 | 0.3533 | pyrite                | 3.65805169  |
| 45.767 | 2.48941 | 26.5   | 139.6 | 0.4239 | Aragonite             |             |
| 46.411 | 2.45673 | 16.2   | 85    | 0.3322 |                       |             |
| 47.286 | 2.41381 | 7.4    | 39.1  | 0.2864 | Aragonite             |             |
| 47.995 | 2.38019 | 15.9   | 34.1  | 0.2406 | Aragonite             |             |
| 48.773 | 2.3445  | 8.8    | 18.8  | 0.2913 | Aragonite             |             |
| Total  |         | 754.3  |       |        |                       |             |

Table S12-13 X ray diffraction data of core 12 sample no.13

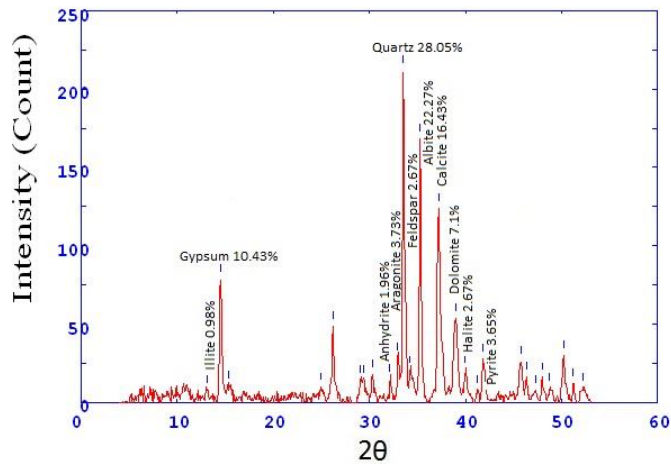

Fig.S15-13 X ray diffractogram of core 12 sample no.13

| 2Theta | d (A)   | Height | Area  | FWHM   | Identified mineral    | WT%         |
|--------|---------|--------|-------|--------|-----------------------|-------------|
| 15.202 | 7.31808 | 10.6   | 126.1 | 0.9042 | gypsum                | 2.703391992 |
| 17.34  | 6.42162 | 8.1    | 24.9  | 0.2794 | -                     |             |
| 19.545 | 5.70319 | 6.7    | 22.4  | 0.3362 | -                     |             |
| 22.4   | 4.9837  | 6.4    | 21.8  | 0.2377 | -                     |             |
| 25.083 | 4.45783 | 5      | 17    | 0.2315 | -                     |             |
| 26.261 | 4.26125 | 35     | 70.6  | 0.2254 | gypsum                | 8.926294313 |
| 29.193 | 3.84117 | 21.9   | 111.1 | 0.4063 | -                     |             |
| 33.064 | 3.4019  | 49.7   | 252   | 0.3292 | Aragonite             |             |
| 33.67  | 3.34243 | 120.6  | 339.5 | 0.2521 | quartz                | 30.75745983 |
| 34.394 | 3.27409 | 32.8   | 92.2  | 0.3939 | feldspar (orthoclase) | 8.365212956 |
| 37.304 | 3.02679 | 174.6  | 1102  | 0.5358 | calcite               | 44.52945677 |
| 39.271 | 2.88068 | 14.2   | 89.8  | 0.4252 | dolomite              | 3.621525121 |
| 40.158 | 2.81961 | 10.9   | 69.1  | 0.3698 | Halite                | 2.779903086 |
| 41.968 | 2.70318 | 28.4   | 91.2  | 0.3145 | pyrite                | 7.243050242 |
| 45.81  | 2.48719 | 44.6   | 214   | 0.4    | anhydrite ,gypsum     |             |
| 48.1   | 2.37532 | 19.7   | 91.1  | 0.3626 | pyrite                |             |
| 48.848 | 2.3411  | 15.9   | 73.4  | 0.4224 | feldspar              |             |
| 50.233 | 2.28058 | 34.9   | 191.9 | 0.4822 | -                     |             |
| 52.5   | 2.18866 | 9.5    | 85.6  | 0.6277 | gypsum                |             |
| Total  |         | 392.1  |       |        |                       |             |

Table S12-14 X ray diffraction data of core 12 sample no.14

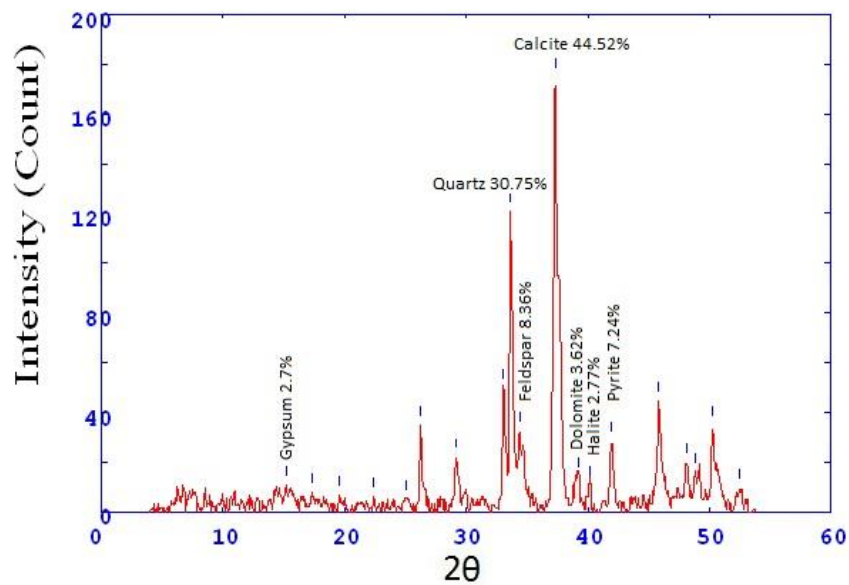

Fig.S15-14 X ray diffractogram of core 12 sample no.14

| 2Theta | d (A)   | Height | Area  | FWHM   | Identified mineral    | WT%         |
|--------|---------|--------|-------|--------|-----------------------|-------------|
| 29.25  | 3.83387 | 12.1   | 58.5  | 0.4441 | -                     |             |
| 32.967 | 3.41169 | 68.3   | 261.1 | 0.3236 | Aragonite             | 13.36333399 |
| 33.533 | 3.35572 | 19.3   | 73.6  | 0.3487 | Quartz                | 3.776169047 |
| 34.259 | 3.28661 | 40.8   | 184.3 | 0.3738 | feldspar (orthoclase) | 56.56427314 |
| 37.557 | 3.0371  | 289.1  | 897.2 | 0.7315 | calcite               | 56.56427314 |
| 39.934 | 2.83477 | 9      | 37.5  | 0.334  | dolomite              | 1.760907846 |
| 41.844 | 2.71082 | 39.9   | 160.2 | 0.3362 | pyrite                | 7.80669145  |
| 45.7   | 2.49285 | 34.4   | 185.4 | 0.464  | dolomite              | 6.7305811   |
| 47.203 | 2.41778 | 10.3   | 55.6  | 0.4143 | anhydrite, gypsum     | 2.015261201 |
| 47.953 | 2.38214 | 23.8   | 107.5 | 0.3647 | anhydrite             |             |
| 48.85  | 2.34101 | 24     | 215.3 | 0.5968 | pyrite                |             |
| 50.734 | 2.25954 | 15.7   | 117.5 | 0.5868 | Quartz                |             |
| 52.533 | 2.18736 | 10.3   | 90.5  | 0.6469 | Aragonite             |             |
| 54.578 | 2.11138 | 19.8   | 97.1  | 0.3789 | Aragonite             |             |
| 55.644 | 2.07405 | 19.8   | 96.5  | 0.4105 | gypsum                |             |
| 56.638 | 2.0406  | 7.5    | 96.5  | 0.4105 | dolomite              |             |
| Total  |         | 511.1  |       |        |                       |             |

Table S12-15 X ray diffraction data of core 12 sample no.15

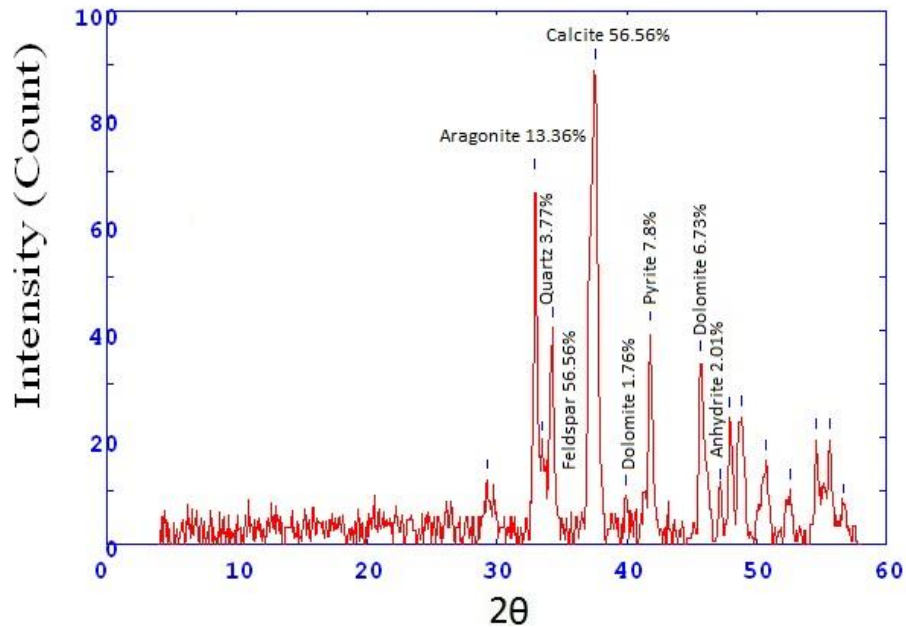

Fig.S15-15 X ray diffractogram of core 12 sample no.15



| 2Theta | d (A)   | Height | Area  | FWHM   | Identified mineral    | WT%         |
|--------|---------|--------|-------|--------|-----------------------|-------------|
| 29.46  | 3.8072  | 12.1   | 165.4 | 0.9856 | -                     |             |
| 33.038 | 3.40448 | 79.2   | 321.7 | 0.334  | anhydrite             | 13.67454068 |
| 33.609 | 3.34832 | 52.1   | 211.7 | 0.4703 | Quartz                | 13.67454068 |
| 34.332 | 3.27989 | 48.8   | 198   | 0.5384 | feldspar (orthoclase) | 12.80839895 |
| 37.652 | 3.01981 | 106.8  | 815.4 | 0.6066 | calcite               | 28.03149606 |
| 39.21  | 2.88503 | 6.8    | 51.9  | 0.4611 | dolomite              | 1.784776903 |
| 40.113 | 2.82264 | 11.9   | 90.7  | 0.3883 | halite                | 3.12335958  |
| 41.916 | 2.70639 | 44.9   | 171.6 | 0.3155 | magnesite, pyrite     | 11.7847769  |
| 45.785 | 2.48844 | 39.1   | 216.8 | 0.4512 | Gypsum ,anhydrite     |             |
| 47.34  | 2.41119 | 14.2   | 78.9  | 0.2768 | gypsum                |             |
| 48.063 | 2.37704 | 30.5   | 168.8 | 0.1896 | pyrite                | 8.005249344 |
| 48.966 | 2.33582 | 25.1   | 138.9 | 0.146  | anhydrite             |             |
| 50.773 | 2.25792 | 16.9   | 93.9  | 0.1242 | -                     |             |
| 52.309 | 2.1961  | 11.9   | 65.8  | 0.1133 | calcite               |             |
| Total  |         | 381    |       |        |                       |             |

Table S12-16X ray diffraction data of core 12 sample no.16

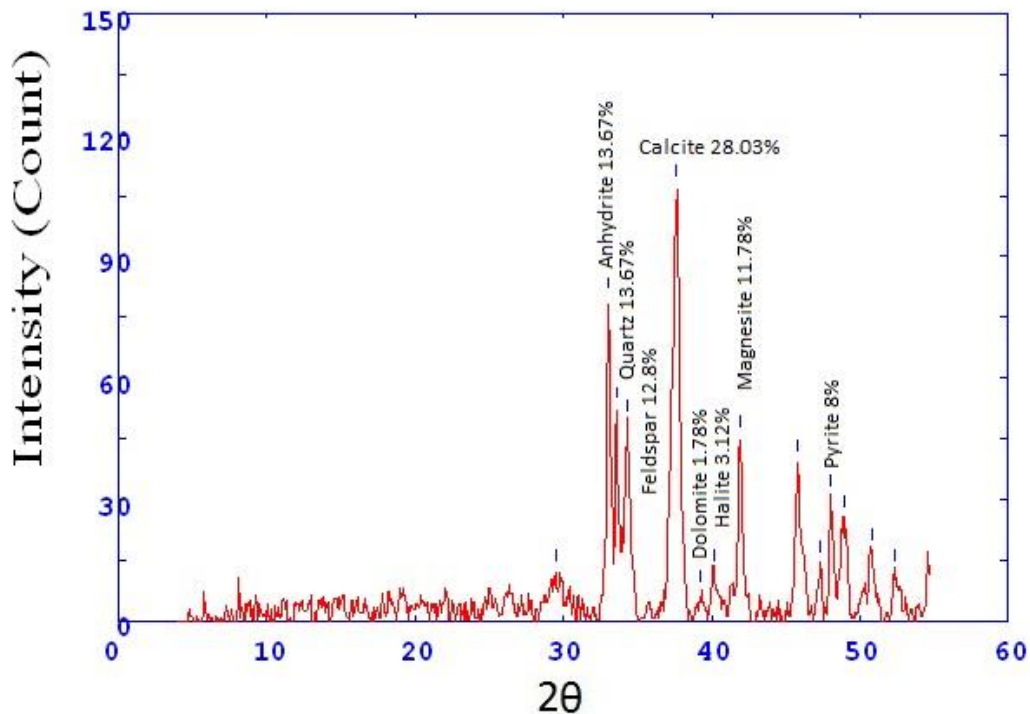

Fig.S15-16 X ray diffractogram of core 12 sample no.16

### Grain size cores analysis

| Size             | WT%            | cumulative WT% |
|------------------|----------------|----------------|
| 0                | 1.516          | 1.516          |
| 0.321928         | 3.475          | 4.991          |
| 0.736965         | 4.14           | 9.131          |
| 1.736966         | 7.775          | 16.906         |
| 2.736966         | 7.971          | 24.877         |
| 3.736966         | 38.403         | 63.28          |
| 5.64385619       | 36.72          | 100            |
| <b>Mean size</b> | <b>sorting</b> |                |
| 6.33377          | 8.839632       |                |

Table S13-1 Grain size analysis of core 1 sample 1

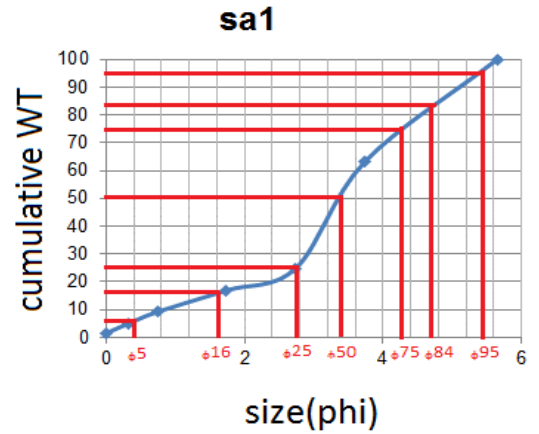

Fig.S16-1 cumulative weight with grain size in Phi unit of core 1 sample no. 1

| size             | WT %           | Cumulative WT % |
|------------------|----------------|-----------------|
| 0                | 1.117          | 1.117           |
| 0.321928         | 3.238          | 4.355           |
| 0.736965         | 5.785          | 10.14           |
| 1.736966         | 18.671         | 28.811          |
| 2.736966         | 24.524         | 53.335          |
| 3.736966         | 22.838         | 76.173          |
| 5.64385619       | 23.827         | 100             |
| <b>Mean size</b> | <b>sorting</b> |                 |
| 5.09153          | 8.493642       |                 |

Table S13-2 Grain size analysis of core 1 sample 2

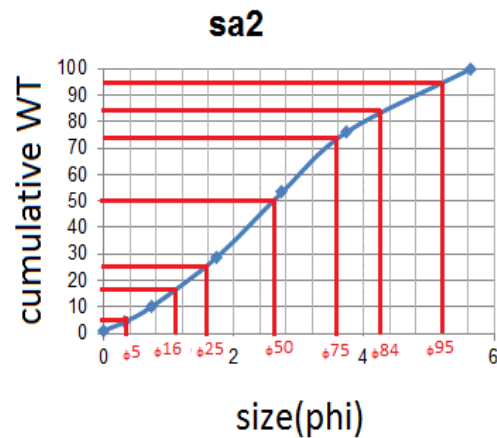

Fig.S16-2 cumulative weight with grain size in Phi unit of core 1 sample no. 2

| size             | WT %           | cumulative WT % |
|------------------|----------------|-----------------|
| 0                | 1.651          | 1.651           |
| 0.321928         | 2.915          | 4.566           |
| 0.736965         | 3.799          | 8.365           |
| 1.736966         | 14.429         | 22.794          |
| 2.736966         | 22.992         | 45.786          |
| 3.736966         | 27.14          | 72.926          |
| 5.64385619       | 27.074         | 100             |
| <b>Mean size</b> | <b>sorting</b> |                 |
| 6.580573         | 9.066486       |                 |

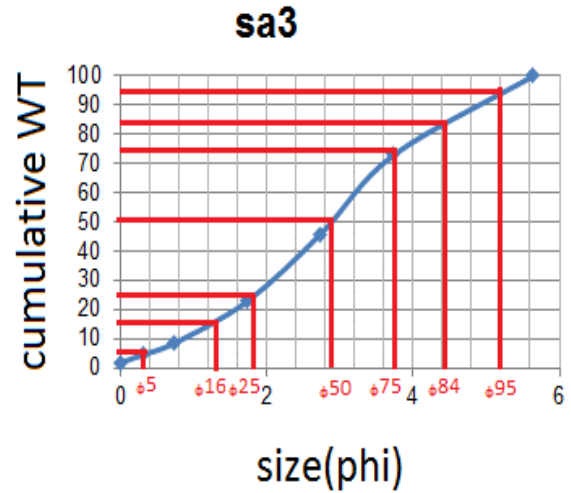

Table S13-3 Grain size analysis of core 1 sample 3

Fig.S16-3 cumulative weight with grain size in Phi unit of core 1 sample no. 3

| size             | WT %           | cumulative WT % |
|------------------|----------------|-----------------|
| 0                | 6.945          | 6.945           |
| 0.321928         | 2.65           | 9.595           |
| 0.736965         | 3.057          | 12.652          |
| 1.736966         | 11.249         | 23.901          |
| 2.736966         | 19.759         | 43.66           |
| 3.736966         | 29.754         | 73.414          |
| 5.64385619       | 26.586         | 100             |
| <b>Mean size</b> | <b>sorting</b> |                 |
| 5.4685           | 8.619654       |                 |

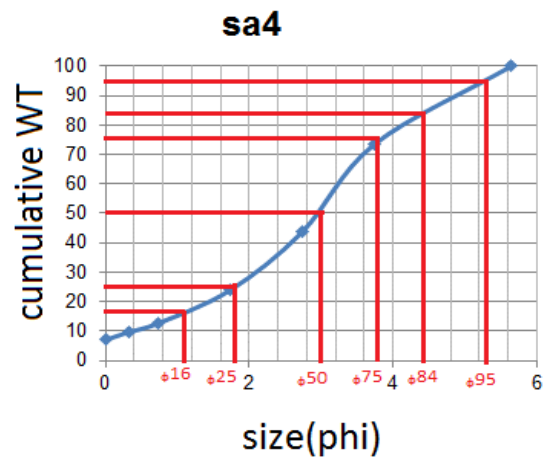

Table S13-4 Grain size analysis of core 1 sample 4

Fig.S16-4 cumulative weight with grain size in Phi unit of core 1 sample no. 4

| size             | WT %           | cumulativeWT % |
|------------------|----------------|----------------|
| 0                | 2.98           | 2.98           |
| 0.321928         | 2.787          | 5.767          |
| 0.736965         | 3.64           | 9.407          |
| 1.736966         | 12.878         | 22.285         |
| 2.736966         | 22.384         | 44.669         |
| 3.736966         | 34.527         | 79.196         |
| 5.64385619       | 20.804         | 100            |
| <b>Mean size</b> | <b>sorting</b> |                |
| 5.506978         | 7.819768       |                |

Table S13-5 Grain size analysis of core 1 sample 5

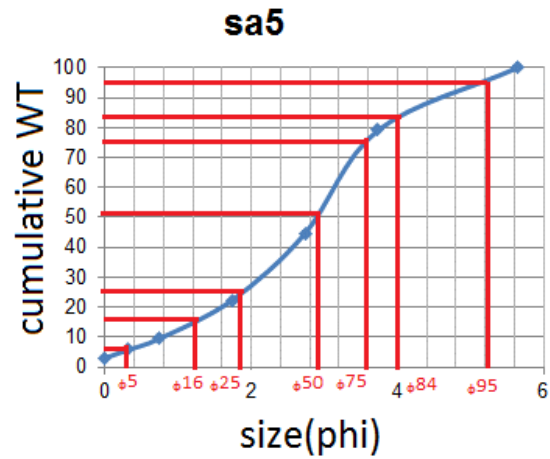

Fig.S16-5 cumulative weight with grain size in Phi unit of core 1 sample no. 5

| size             | WT%            | Cumulative WT% |
|------------------|----------------|----------------|
| 0                | 10.958         | 10.958         |
| 0.321928         | 4.267          | 15.225         |
| 0.736965         | 5.723          | 20.948         |
| 1.736966         | 15.118         | 36.066         |
| 2.736966         | 20.065         | 56.131         |
| 3.736966         | 25.736         | 81.867         |
| 5.64385619       | 18.133         | 100            |
| Mean size        | sorting        |                |
| 4.13475          | 8.08206        |                |
| <b>Mean size</b> | <b>sorting</b> |                |
| 4.13475          | 8.08206        |                |

Table S13-6 Grain size analysis of core 1 sample 6

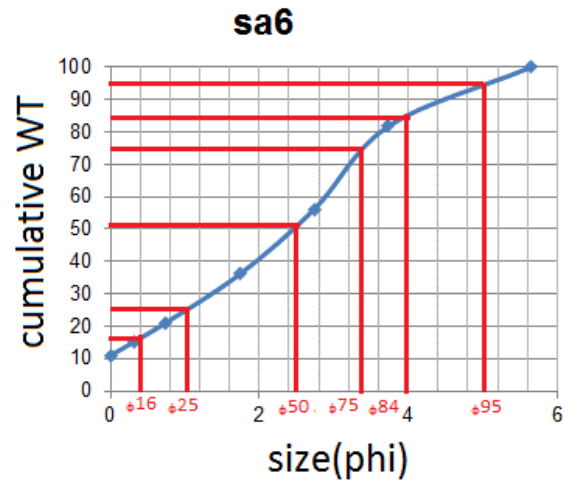

Fig.S16-6 cumulative weight with grain size in Phi unit of core 1 sample no. 6

| size             | WT %           | cumulative WT % |
|------------------|----------------|-----------------|
| 0                | 20.949         | 20.949          |
| 0.321928         | 5.501          | 26.45           |
| 0.736965         | 6.341          | 32.791          |
| 1.736966         | 14.324         | 47.115          |
| 2.736966         | 21.165         | 68.28           |
| 3.736966         | 19.862         | 88.142          |
| 5.64385619       | 11.858         | 100             |
| <b>Mean size</b> | <b>sorting</b> |                 |
| 2.881786         | 7.495146       |                 |

Table S13-7 Grain size analysis of core 1 sample 7

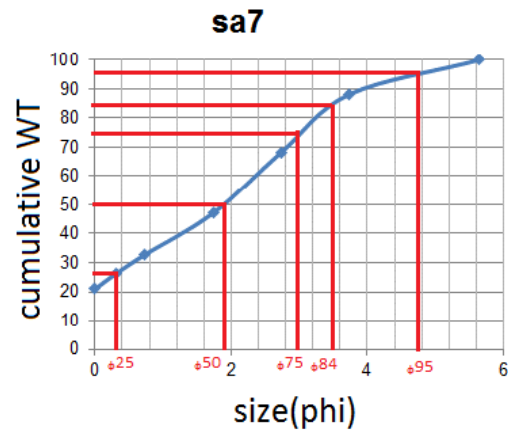

Fig.S16-7 cumulative weight with grain size in Phi unit of core 1 sample no. 7

| size             | WT %           | cumulative WT% |
|------------------|----------------|----------------|
| 0                | 20.349         | 20.349         |
| 0.321928         | 4.215          | 24.564         |
| 0.736965         | 5.857          | 30.421         |
| 1.736966         | 15.859         | 46.28          |
| 2.736966         | 24.085         | 70.365         |
| 3.736966         | 17.573         | 87.938         |
| 5.64385619       | 12.062         | 100            |
| <b>Mean size</b> | <b>sorting</b> |                |
| 2.818043         | 7.57713        |                |

Table S13-8 Grain size analysis of core 1 sample 8

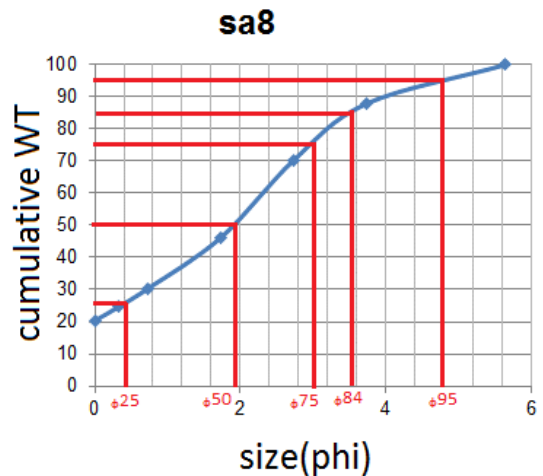

Fig.S16-8 cumulative weight with grain size in Phi unit of core 1 sample no. 8

| size             | WT %           | cumulative WT % |
|------------------|----------------|-----------------|
| 0                | 13.83          | 13.83           |
| 0.321928         | 5.279          | 19.109          |
| 0.736965         | 6.085          | 25.194          |
| 1.736966         | 15.091         | 40.285          |
| 2.736966         | 22.453         | 62.738          |
| 3.736966         | 20.412         | 83.15           |
| 5.64385619       | 16.85          | 100             |
| <b>Mean size</b> | <b>sorting</b> |                 |
| 3.5758           | 8.098216       |                 |

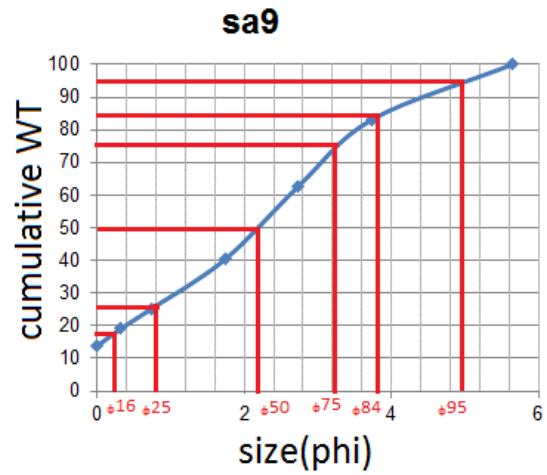

Table S13-9 Grain size analysis of core 1 sample 9

Fig.S16-9 cumulative weight with grain size in Phi unit of core 1 sample no. 9

| size             | WT %           | cumulative WT % |
|------------------|----------------|-----------------|
| 0                | 10.231         | 10.231          |
| 0.321928         | 5.149          | 15.38           |
| 0.736965         | 6.662          | 22.042          |
| 1.736966         | 20.046         | 42.088          |
| 2.736966         | 28.617         | 70.705          |
| 3.736966         | 19.805         | 90.51           |
| 5.64385619       | 9.49           | 100             |
| <b>Mean size</b> | <b>sorting</b> |                 |
| 3.482771         | 7.050196       |                 |

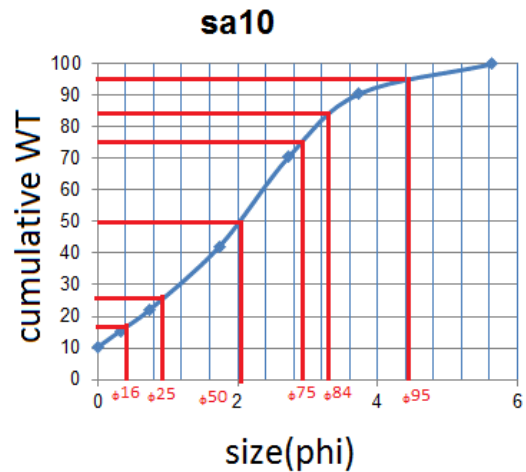

Table S13-10 Grain size analysis of core 1 sample 10

Fig.S16-10 cumulative weight with grain size in Phi unit of core 1 sample no. 10

| size             | WT%            | cumulative WT% |
|------------------|----------------|----------------|
| 0                | 4.981          | 4.981          |
| 0.321928         | 4.598          | 9.579          |
| 0.736965         | 5.122          | 14.701         |
| 1.736966         | 11.992         | 26.693         |
| 2.736966         | 15.448         | 42.141         |
| 3.736966         | 25.44          | 67.581         |
| 5.64385619       | 32.419         | 100            |
| <b>Mean size</b> | <b>sorting</b> |                |
| 5.255839         | 9.14149        |                |

Table S14-1 Grain size analysis of core2 sample 1

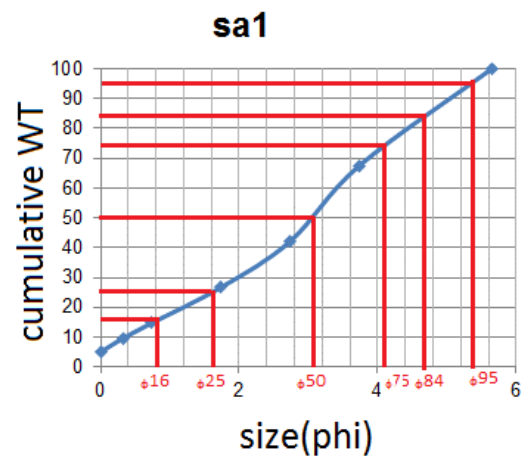

Fig.S17-1 cumulative weight with grain size in Phi unit of core 2 sample no. 1

| size             | WT %           | cumulative WT % |
|------------------|----------------|-----------------|
| 0                | 17.241         | 17.241          |
| 0.321928         | 9.81           | 27.051          |
| 0.736965         | 9.511          | 36.562          |
| 1.736966         | 16.492         | 53.054          |
| 2.736966         | 21.986         | 75.04           |
| 3.736966         | 14.879         | 89.919          |
| 5.64385619       | 10.081         | 100             |
| <b>Mean size</b> | <b>sorting</b> |                 |
| 2.610193         | 7.160603       |                 |

Table S14-2 Grain size analysis of core2 sample 2

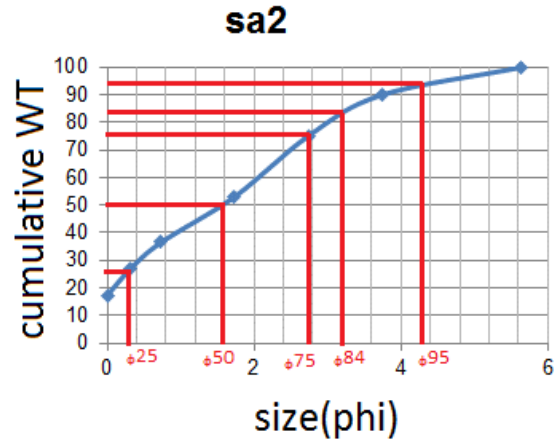

Fig.S17-2 cumulative weight with grain size in Phi unit of core 2 sample no. 2

| size             | WT %           | cumulative WT % |
|------------------|----------------|-----------------|
| 0                | 7.754          | 7.754           |
| 0.321928         | 5.239          | 12.993          |
| 0.736965         | 7.807          | 20.8            |
| 1.736966         | 17.744         | 38.544          |
| 2.736966         | 31.624         | 70.168          |
| 3.736966         | 20.145         | 90.313          |
| 5.64385619       | 9.687          | 100             |
| <b>Mean size</b> | <b>sorting</b> |                 |
| 3.714673         | 7.026248       |                 |

Table S14-3 Grain size analysis of core2 sample 3

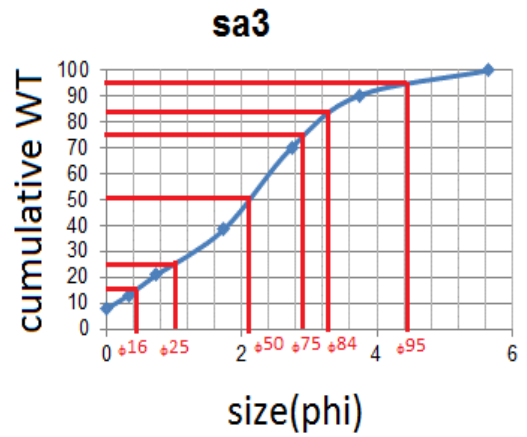

Fig.S17-3 cumulative weight with grain size in Phi unit of core 2 sample no. 3

| size             | WT %           | cumulative WT % |
|------------------|----------------|-----------------|
| 0                | 9.07           | 9.07            |
| 0.321928         | 4.529          | 13.599          |
| 0.736965         | 5.905          | 19.504          |
| 1.736966         | 12.857         | 32.361          |
| 2.736966         | 33.027         | 65.388          |
| 3.736966         | 27.835         | 93.223          |
| 5.64385619       | 6.777          | 100             |
| <b>Mean size</b> | <b>sorting</b> |                 |
| 3.919714         | 6.748145       |                 |

Table S14-4 Grain size analysis of core2 sample 4

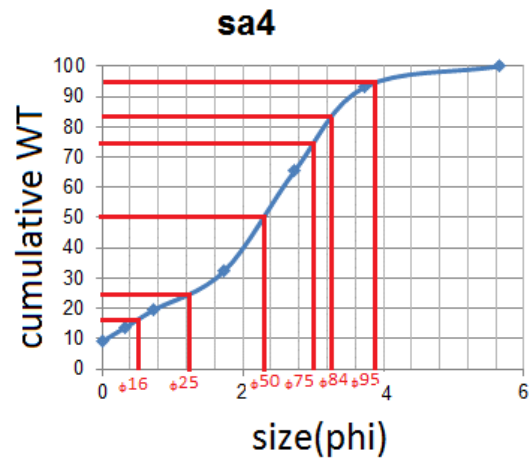

Fig.S17-4 cumulative weight with grain size in Phi unit of core 2 sample no. 4



| size             | WT%            | cumulative WT % |
|------------------|----------------|-----------------|
| 0                | 16.614         | 16.614          |
| 0.321928         | 5.16           | 21.774          |
| 0.736965         | 4.92           | 26.694          |
| 1.736966         | 11.802         | 38.496          |
| 2.736966         | 29.354         | 67.85           |
| 3.736966         | 30.29          | 98.14           |
| 5.64385619       | 1.86           | 100             |
| <b>Mean size</b> | <b>sorting</b> |                 |
| 3.23065          | 6.599271       |                 |

Table S14-5 Grain size analysis of core2 sample 5

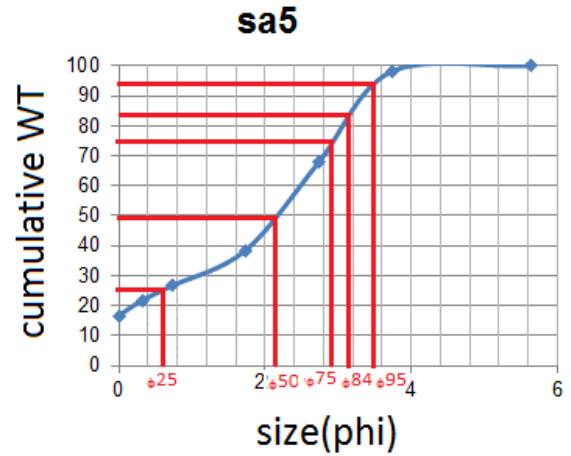

Fig.S17-5 cumulative weight with grain size in Phi unit of core 2 sample no. 5

| size             | WT %           | cumulative WT % |
|------------------|----------------|-----------------|
| 0                | 11.766         | 11.766          |
| 0.321928         | 3.518          | 15.284          |
| 0.736965         | 4.545          | 19.829          |
| 1.736966         | 10.982         | 30.811          |
| 2.736966         | 29.922         | 60.733          |
| 3.736966         | 37.695         | 98.428          |
| 5.64385619       | 1.572          | 100             |
| <b>Mean size</b> | <b>sorting</b> |                 |
| 3.973583         | 6.66662        |                 |

Table S14-6 Grain size analysis of core2 sample 6

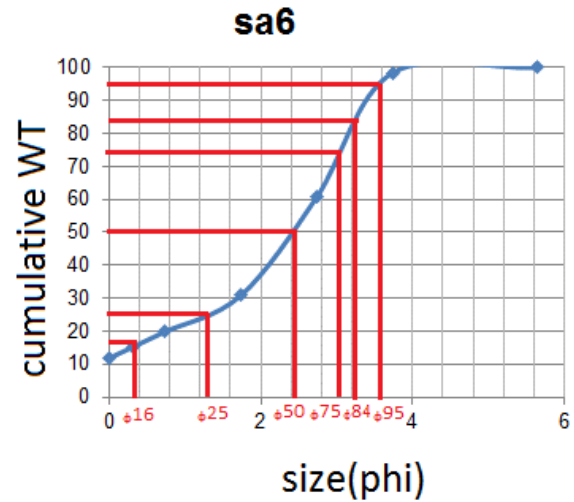

Fig.S17-6 cumulative weight with grain size in Phi unit of core 2 sample no. 6

| size             | WT%            | cumulative WT% |
|------------------|----------------|----------------|
| 0                | 12.636         | 12.636         |
| 0.321928         | 3.975          | 16.611         |
| 0.736965         | 4.307          | 20.918         |
| 1.736966         | 7.429          | 28.347         |
| 2.736966         | 6.665          | 35.012         |
| 3.736966         | 34.028         | 69.04          |
| 5.64385619       | 30.96          | 100            |
| <b>Mean size</b> | <b>sorting</b> |                |
| 3.0551           | 7.308591       |                |

Table S15-1 Grain size analysis of core3 sample 1

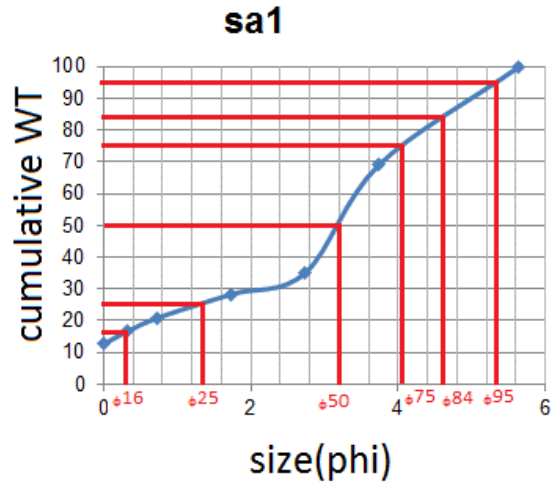

Fig.S18-1 cumulative weight with grain size in Phi unit of core 3 sample no. 1

| size             | WT %           | Cumulative WT % |
|------------------|----------------|-----------------|
| 0                | 14.221         | 14.221          |
| 0.321928         | 5.407          | 19.628          |
| 0.736965         | 7.675          | 27.303          |
| 1.736966         | 18.575         | 45.878          |
| 2.736966         | 19.461         | 65.339          |
| 3.736966         | 18.054         | 83.393          |
| 5.64385619       | 16.607         | 100             |
| <b>Mean size</b> | <b>sorting</b> |                 |
| 2.603333         | 6.83197        |                 |

Table S15-2 Grain size analysis of core3 sample 2

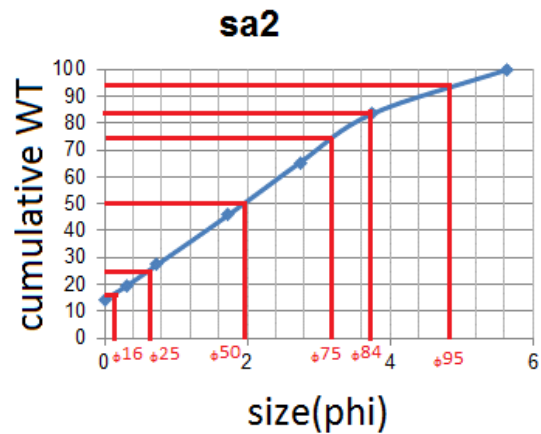

Fig.S18-2 cumulative weight with grain size in Phi unit of core 3 sample no. 2

| size             | WT%            | cumulative WT % |
|------------------|----------------|-----------------|
| 0                | 9.713          | 9.713           |
| 0.321928         | 3.923          | 13.636          |
| 0.736965         | 5.654          | 19.29           |
| 1.736966         | 16.091         | 35.381          |
| 2.736966         | 19.215         | 54.596          |
| 3.736966         | 26.055         | 80.651          |
| 5.64385619       | 19.349         | 100             |
| <b>Mean size</b> | <b>sorting</b> |                 |
| 2.411333         | 6.962644       |                 |

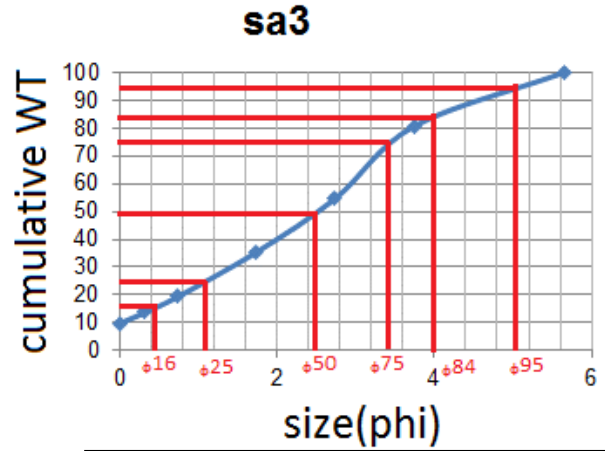

Table S15-3 Grain size analysis of core3 sample 3

Fig.S18-3 cumulative weight with grain size in Phi unit of core 3 sample no. 3

| size             | WT%            | cumulative WT % |
|------------------|----------------|-----------------|
| 0                | 10.846         | 10.846          |
| 0.321928         | 3.598          | 14.444          |
| 0.736965         | 4.656          | 19.1            |
| 1.736966         | 12.749         | 31.849          |
| 2.736966         | 19.323         | 51.172          |
| 3.736966         | 30.2           | 81.372          |
| 5.64385619       | 18.628         | 100             |
| <b>Mean size</b> | <b>sorting</b> |                 |
| 2.26             | 8.868258       |                 |

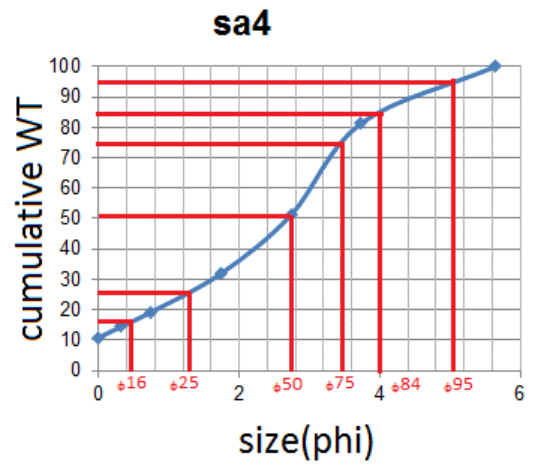

Table S15-4 Grain size analysis of core3 sample 4

Fig.S18-4 cumulative weight with grain size in Phi unit of core 3 sample no. 4

| size             | WT%            | cumulative WT % |
|------------------|----------------|-----------------|
| 0                | 12.297         | 12.297          |
| 0.321928         | 3.562          | 15.859          |
| 0.736965         | 5.31           | 21.169          |
| 1.736966         | 14.819         | 35.988          |
| 2.736966         | 41.575         | 77.563          |
| 3.736966         | 20.632         | 98.195          |
| 5.64385619       | 1.805          | 100             |
| <b>Mean size</b> | <b>sorting</b> |                 |
| 1.133333         | 5.394          |                 |

Table S15-5 Grain size analysis of core3 sample 5

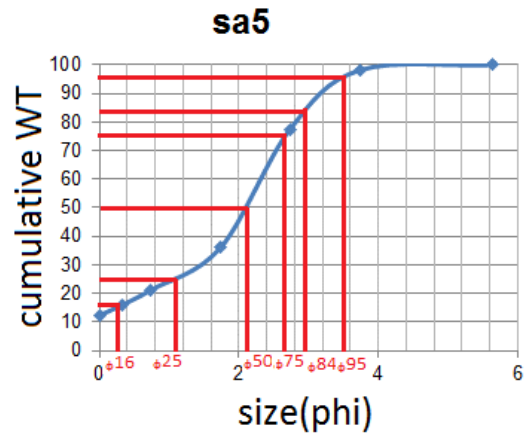

Fig.S18-5 cumulative weight with grain size in Phi unit of core 3 sample no. 5

| size             | WT%            | Cumulative WT % |
|------------------|----------------|-----------------|
| 0                | 7.58           | 7.58            |
| 0.321928         | 3.659          | 11.239          |
| 0.736965         | 5.588          | 16.827          |
| 1.736966         | 14.779         | 31.606          |
| 2.736966         | 26.043         | 57.649          |
| 3.736966         | 24.062         | 81.711          |
| 5.64385619       | 18.289         | 100             |
| <b>Mean size</b> | <b>sorting</b> |                 |
| 3.826667         | 4.614773       |                 |

Table S15-6 Grain size analysis of core3 sample 6

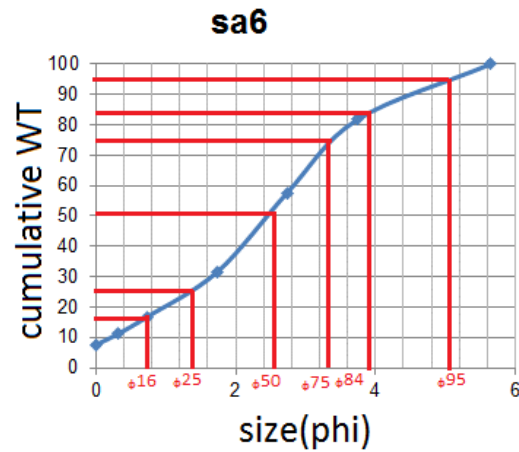

Fig.S18-6 cumulative weight with grain size in Phi unit of core 3 sample no. 6

| size             | WT %           | cumulative WT % |
|------------------|----------------|-----------------|
| 0                | 13.825         | 13.825          |
| 0.321928         | 5.019          | 18.844          |
| 0.736965         | 6.616          | 25.46           |
| 1.736966         | 15.425         | 40.885          |
| 2.736966         | 26.575         | 67.46           |
| 3.736966         | 20.563         | 88.023          |
| 5.64385619       | 11.977         | 100             |
| <b>Mean size</b> | <b>sorting</b> |                 |
| 2.168            | 6.854667       |                 |

Table S15-7 Grain size analysis of core3 sample 7

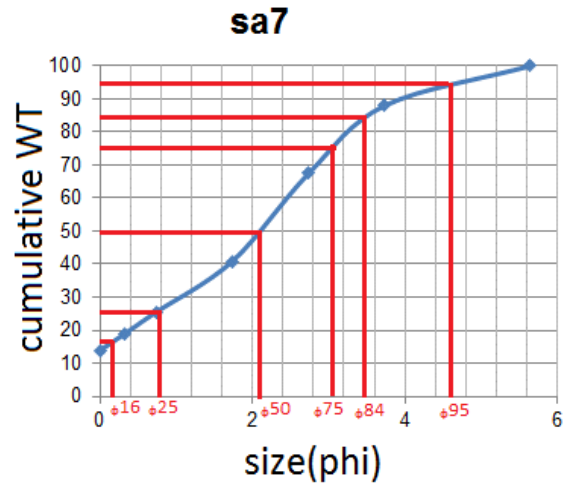

Fig.S18-7 cumulative weight with grain size in Phi unit of core 3 sample no. 7

| size             | WT %           | cumulative WT% |
|------------------|----------------|----------------|
| 0                | 10.434         | 10.434         |
| 0.321928         | 3.548          | 13.982         |
| 0.736965         | 4.49           | 18.472         |
| 1.736966         | 10.457         | 28.929         |
| 2.736966         | 31.902         | 60.831         |
| 3.736966         | 34.684         | 95.515         |
| 5.64385619       | 4.485          | 100            |
| <b>Mean size</b> | <b>sorting</b> |                |
| 4.503333         | 8.117197       |                |

Table S15-8 Grain size analysis of core3 sample 8

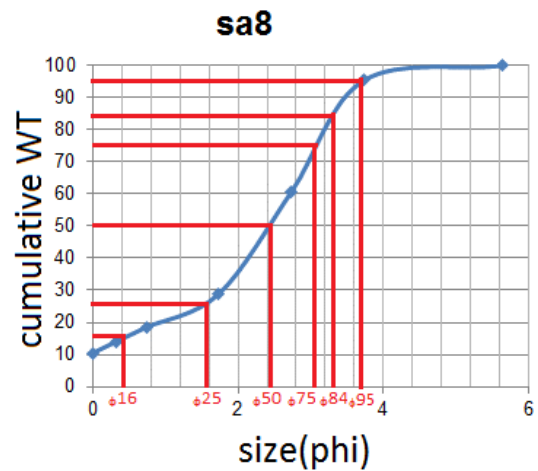

Fig.S18-8 cumulative weight with grain size in Phi unit of core 3 sample no. 8

| size             | WT%            | cumulative WT % |
|------------------|----------------|-----------------|
| 0                | 17.504         | 17.504          |
| 0.321928         | 5.288          | 22.792          |
| 0.736965         | 5.944          | 28.736          |
| 1.736966         | 12.566         | 41.302          |
| 2.736966         | 28.547         | 69.849          |
| 3.736966         | 26.365         | 96.214          |
| 5.64385619       | 3.7866         | 100.0006        |
| <b>Mean size</b> | <b>sorting</b> |                 |
| 5.521667         | 8.403295       |                 |

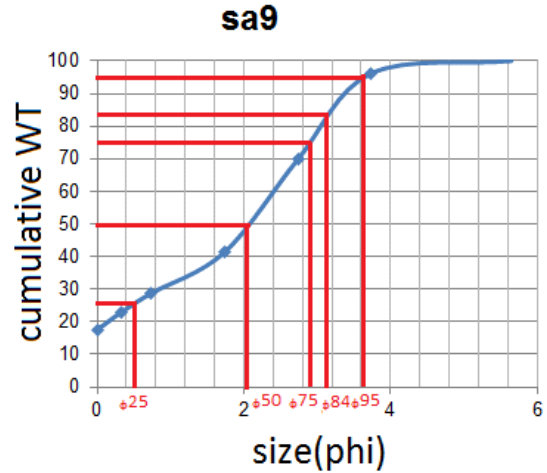

Table S15-9 Grain size analysis of core3 sample 9

Fig.S18-9 cumulative weight with grain size in Phi unit of core 3 sample no. 9

| size             | WT%            | cumulative WT% |
|------------------|----------------|----------------|
| 0                | 20.868         | 20.868         |
| 0.321928         | 5.971          | 26.839         |
| 0.736965         | 7.033          | 33.872         |
| 1.736966         | 14.446         | 48.318         |
| 2.736966         | 19.609         | 67.927         |
| 3.736966         | 15.972         | 83.899         |
| 5.64385619       | 16.101         | 100            |
| <b>Mean size</b> | <b>sorting</b> |                |
| 2.61             | 8.152424       |                |

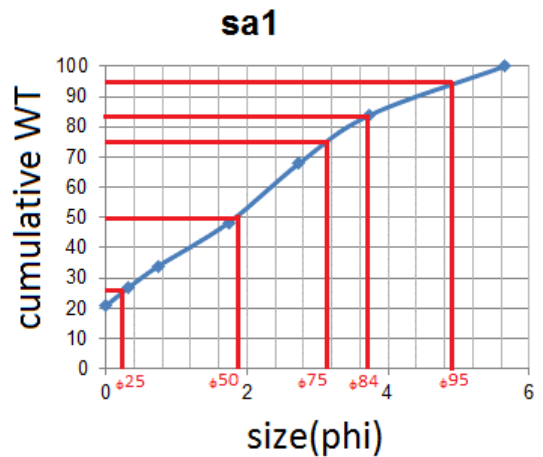

Table S16-1 Grain size analysis of core4sample 1

Fig.S19-1 cumulative weight with grain size in Phi unit of core 4 sample no. 1

| size             | WT %           | cumulative WT % |
|------------------|----------------|-----------------|
| 0                | 10.467         | 10.467          |
| 0.321928         | 4.664          | 15.131          |
| 0.736965         | 7.441          | 22.572          |
| 1.736966         | 18.776         | 41.348          |
| 2.736966         | 27.045         | 68.393          |
| 3.736966         | 19.205         | 87.598          |
| 5.64385619       | 12.402         | 100             |
| <b>Mean size</b> | <b>sorting</b> |                 |
| 3.612333         | 7.475674       |                 |

Table S16-2 Grain size analysis of core4sample 2

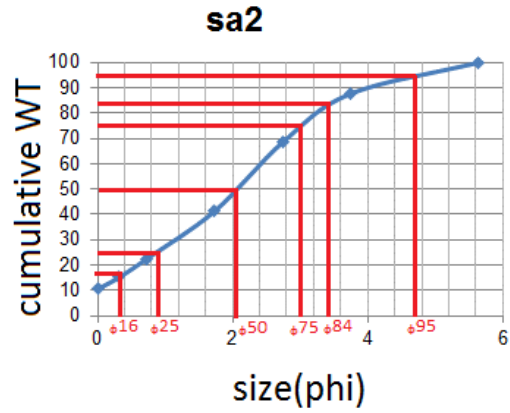

Fig.S19-2 cumulative weight with grain size in Phi unit of core 4 sample no. 2

| size             | WT %           | cumulative WT % |
|------------------|----------------|-----------------|
| 0                | 4.267          | 4.267           |
| 0.321928         | 2.509          | 6.776           |
| 0.736965         | 4.977          | 11.753          |
| 1.736966         | 17.793         | 29.546          |
| 2.736966         | 41.518         | 71.064          |
| 3.736966         | 22.173         | 93.237          |
| 5.64385619       | 6.763          | 100             |
| <b>Mean size</b> | <b>sorting</b> |                 |
| 4.417333         | 6.411205       |                 |

Table S16-3 Grain size analysis of core4sample 3

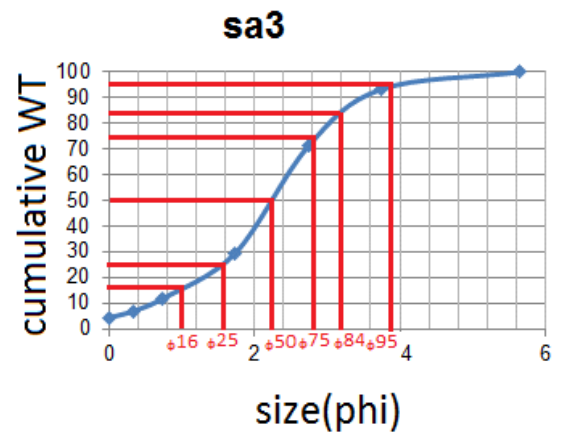

Fig.S19-3 cumulative weight with grain size in Phi unit of core 4 sample no. 3

| size             | WT%            | cumulative WT % |
|------------------|----------------|-----------------|
| 0                | 1.974          | 1.974           |
| 0.321928         | 1.521          | 3.495           |
| 0.736965         | 2.94           | 6.435           |
| 1.736966         | 13.239         | 19.674          |
| 2.736966         | 44.122         | 63.796          |
| 3.736966         | 29.995         | 93.791          |
| 5.64385619       | 6.209          | 100             |
| <b>Mean size</b> | <b>sorting</b> |                 |
| 5.139333         | 6.347348       |                 |

Table S16-4 Grain size analysis of core4sample 4

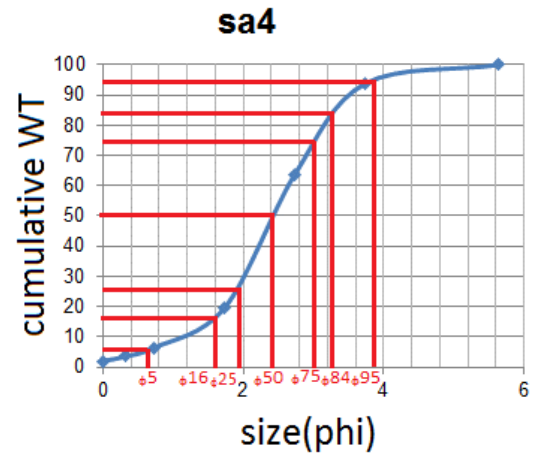

Fig.S19-4 cumulative weight with grain size in Phi unit of core 4 sample no. 4

| size             | WT %           | cumulative WT % |
|------------------|----------------|-----------------|
| 0                | 1.492          | 1.492           |
| 0.321928         | 0.996          | 2.488           |
| 0.736965         | 2.348          | 4.836           |
| 1.736966         | 19.587         | 24.423          |
| 2.736966         | 54.548         | 78.971          |
| 3.736966         | 18.903         | 97.874          |
| 5.64385619       | 2.126          | 100             |
| <b>Mean size</b> | <b>sorting</b> |                 |
| 4.651133         | 5.529535       |                 |

Table S16-5 Grain size analysis of core4sample 5

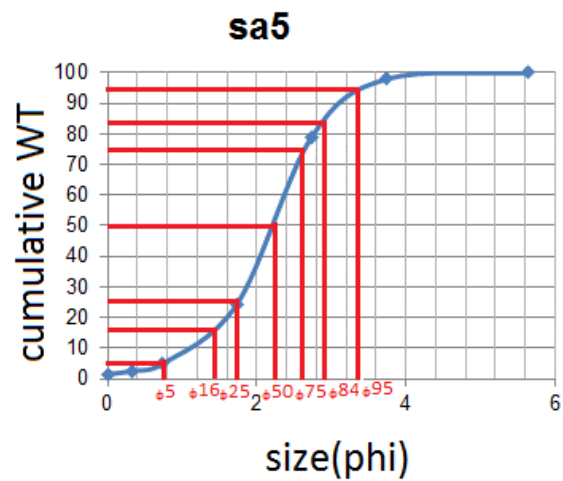

Fig.S19-5 cumulative weight with grain size in Phi unit of core 4 sample no. 5



| size             | WT %           | cumulative WT % |
|------------------|----------------|-----------------|
| 0                | 1.98           | 1.98            |
| 0.321928         | 1.176          | 3.156           |
| 0.736965         | 2.204          | 5.36            |
| 1.736966         | 14.286         | 19.646          |
| 2.736966         | 49.199         | 68.845          |
| 3.736966         | 29.081         | 97.926          |
| 5.64385619       | 2.074          | 100             |
| <b>Mean size</b> | <b>sorting</b> |                 |
| 5.05732          | 5.918961       |                 |

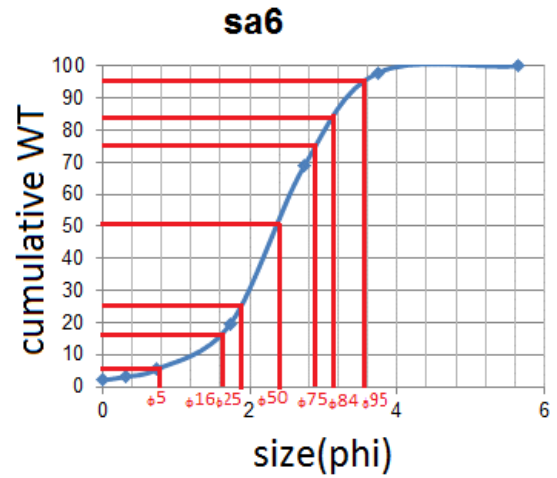

Table S16-6 Grain size analysis of core4sample 6

Fig.S19-6 cumulative weight with grain size in Phi unit of core 4 sample no. 6

| size             | WT %           | cumulative WT % |
|------------------|----------------|-----------------|
| 0                | 5.032          | 5.032           |
| 0.321928         | 2.25           | 7.282           |
| 0.736965         | 4.296          | 11.578          |
| 1.736966         | 17.577         | 29.155          |
| 2.736966         | 43.282         | 72.437          |
| 3.736966         | 22.791         | 95.228          |
| 5.64385619       | 4.772          | 100             |
| <b>Mean size</b> | <b>sorting</b> |                 |
| 4.3663           | 6.256008       |                 |

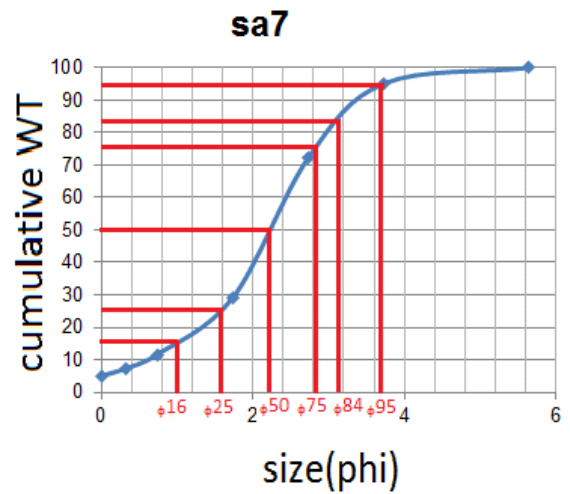

Table S16-7 Grain size analysis of core4sample 7

Fig.S19-7 cumulative weight with grain size in Phi unit of core 4 sample no. 7

| size             | WT %           | cumulative WT % |
|------------------|----------------|-----------------|
| 0                | 3.749          | 3.749           |
| 0.321928         | 1.338          | 5.087           |
| 0.736965         | 2.404          | 7.491           |
| 1.736966         | 12.335         | 19.826          |
| 2.736966         | 43.912         | 63.738          |
| 3.736966         | 34.301         | 98.039          |
| 5.64385619       | 1.961          | 100             |
| <b>Mean size</b> | <b>sorting</b> |                 |
| 5.112867         | 6.173006       |                 |

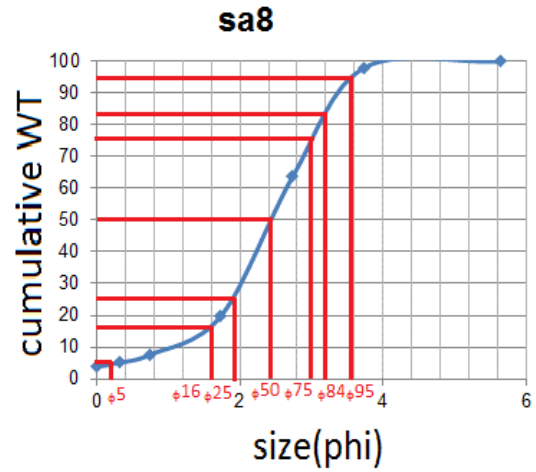

Table S16-8 Grain size analysis of core4sample 8

Fig.S19-8 cumulative weight with grain size in Phi unit of core 4 sample no. 8

| size             | WT%            | cumulative WT % |
|------------------|----------------|-----------------|
| 0                | 28.101         | 28.101          |
| 0.321928         | 5.886          | 33.987          |
| 0.736965         | 7.673          | 41.66           |
| 1.736966         | 17.664         | 59.324          |
| 2.736966         | 18.281         | 77.605          |
| 3.736966         | 15.24          | 92.845          |
| 5.64385619       | 7.155          | 100             |
| <b>Mean size</b> | <b>sorting</b> |                 |
| 1.95299          | 6.695535       |                 |

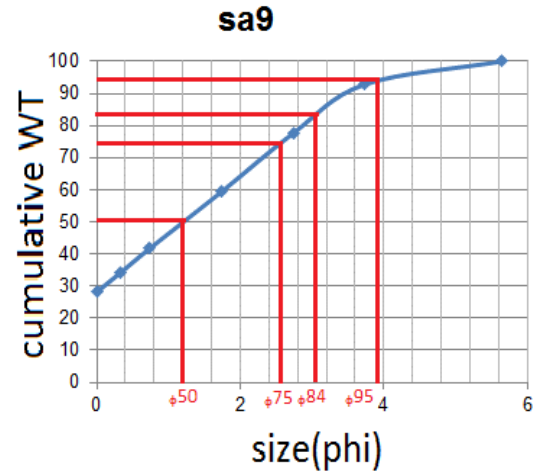

Table S16-9 Grain size analysis of core4sample 9

Fig.S19-9 cumulative weight with grain size in Phi unit of core 4 sample no. 9

| size             | WT%            | cumulative WT% |
|------------------|----------------|----------------|
| 0                | 17.86          | 17.86          |
| 0.321928         | 5.667          | 23.527         |
| 0.736965         | 7.56           | 31.087         |
| 1.736966         | 17.098         | 48.185         |
| 2.736966         | 21.178         | 69.363         |
| 3.736966         | 20.526         | 89.889         |
| 5.64385619       | 10.111         | 100            |
| <b>Mean size</b> | <b>sorting</b> |                |
| 2.74735          | 7.207403       |                |

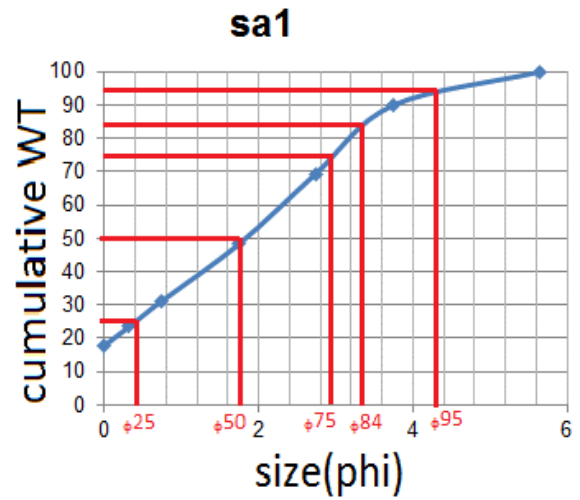

Table S17-1 Grain size analysis of core5sample1

Fig.S20-1 cumulative weight with grain size in Phi unit of core 5sample no. 1

| size             | WT %           | cumulative WT % |
|------------------|----------------|-----------------|
| 0                | 14.668         | 14.668          |
| 0.321928         | 6.026          | 20.694          |
| 0.736965         | 8.783          | 29.477          |
| 1.736966         | 18.397         | 47.874          |
| 2.736966         | 19.26          | 67.134          |
| 3.736966         | 14.08          | 81.214          |
| 5.64385619       | 18.786         | 100             |
| <b>Mean size</b> | <b>sorting</b> |                 |
| 3.194333         | 8.320795       |                 |

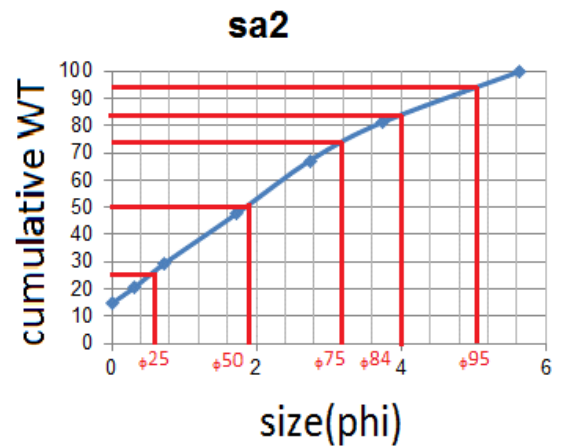

Table S17-2 Grain size analysis of core5 sample 2

Fig.S20-2 cumulative weight with grain size in Phi unit of core 5sample no.2

| size             | WT %           | cumulative WT % |
|------------------|----------------|-----------------|
| 0                | 9.063          | 9.063           |
| 0.321928         | 5.166          | 14.229          |
| 0.736965         | 7.214          | 21.443          |
| 1.736966         | 16.778         | 38.221          |
| 2.736966         | 39.002         | 77.223          |
| 3.736966         | 19.362         | 96.585          |
| 5.64385619       | 3.415          | 100             |
| <b>Mean size</b> | <b>sorting</b> |                 |
| 3.444333         | 6.181198       |                 |

Table S17-3 Grain size analysis of core 5 sample 3

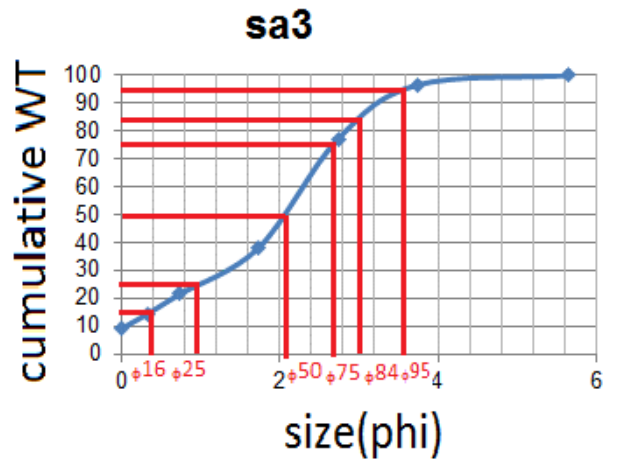

Fig.S20-3 cumulative weight with grain size in Phi unit of core 5 sample no.3

| size             | WT %           | cumulative WT % |
|------------------|----------------|-----------------|
| 0                | 8.832          | 8.832           |
| 0.321928         | 5.005          | 13.837          |
| 0.736965         | 8.729          | 22.566          |
| 1.736966         | 23.847         | 46.413          |
| 2.736966         | 39.947         | 86.36           |
| 3.736966         | 11.968         | 98.328          |
| 5.64385619       | 1.672          | 100             |
| <b>Mean size</b> | <b>sorting</b> |                 |
| 3.143667         | 5.499894       |                 |

Table S17-4 Grain size analysis of core 5 sample 4

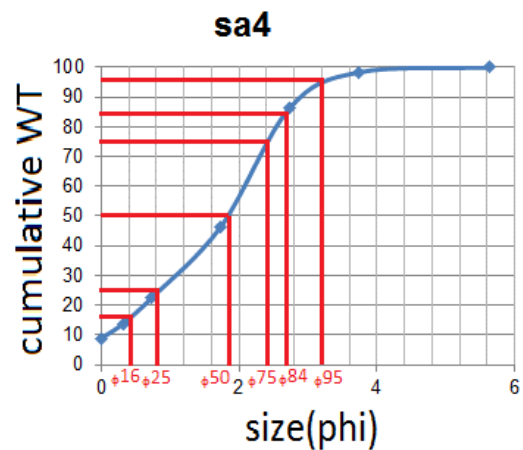

Fig.S20-4 cumulative weight with grain size in Phi unit of core 5 sample no.4

| size             | WT%            | cumulative WT% |
|------------------|----------------|----------------|
| 0                | 12.08          | 12.08          |
| 0.321928         | 5.501          | 17.581         |
| 0.736965         | 7.653          | 25.234         |
| 1.736966         | 20.936         | 46.17          |
| 2.736966         | 33.546         | 79.716         |
| 3.736966         | 15.336         | 95.052         |
| 5.64385619       | 4.948          | 100            |
| <b>Mean size</b> | <b>sorting</b> |                |
| 2.9542           | 6.301268       |                |

Table S18-1 Grain size analysis of core6 sample 1

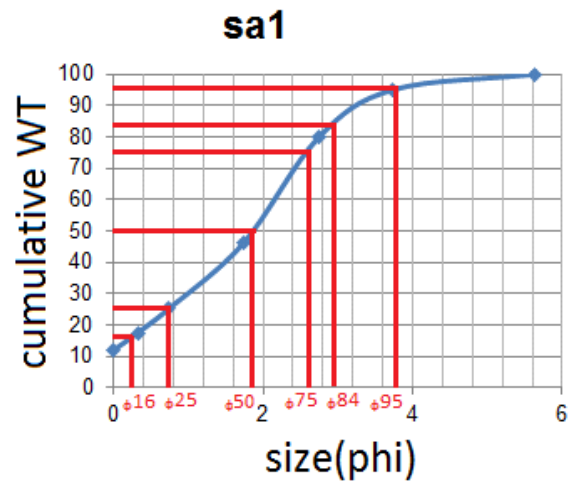

Fig.S21-1 cumulative weight with grain size in Phi unit of core 6sample no.1

| size             | WT %           | cumulative WT % |
|------------------|----------------|-----------------|
| 0                | 6.629          | 6.629           |
| 0.321928         | 5.523          | 12.152          |
| 0.736965         | 10.884         | 23.036          |
| 1.736966         | 30.902         | 53.938          |
| 2.736966         | 30.55          | 84.488          |
| 3.736966         | 11.7           | 96.188          |
| 5.64385619       | 3.812          | 100             |
| <b>Mean size</b> | <b>sorting</b> |                 |
| 3.016567         | 5.800123       |                 |

Table S18-2 Grain size analysis of core6 sample 2

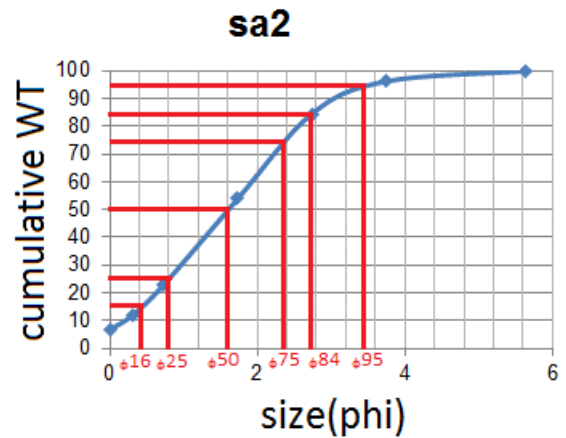

Fig.S21-2 cumulative weight with grain size in Phi unit of core 6sample no.2

| size             | WT %           | cumulative WT % |
|------------------|----------------|-----------------|
| 0                | 5.373          | 5.373           |
| 0.321928         | 2.471          | 7.844           |
| 0.736965         | 4.715          | 12.559          |
| 1.736966         | 18.741         | 31.3            |
| 2.736966         | 42.834         | 74.134          |
| 3.736966         | 23.531         | 97.665          |
| 5.64385619       | 2.335          | 100             |
| <b>Mean size</b> | <b>sorting</b> |                 |
| 4.230667         | 6.066864       |                 |

Table S18-3 Grain size analysis of core6 sample 3

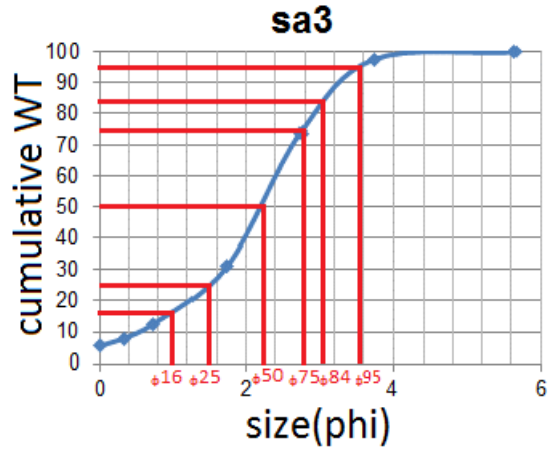

Fig.S21-3 cumulative weight with grain size in Phi unit of core 6sample no.3

| size             | WT %           | cumulative WT % |
|------------------|----------------|-----------------|
| 0                | 7.461          | 7.461           |
| 0.321928         | 4.024          | 11.485          |
| 0.736965         | 5.243          | 16.728          |
| 1.736966         | 12.751         | 29.479          |
| 2.736966         | 34.17          | 63.649          |
| 3.736966         | 33.099         | 96.748          |
| 5.64385619       | 3.252          | 100             |
| <b>Mean size</b> | <b>sorting</b> |                 |
| 4.14435          | 6.565728       |                 |

Table S18-4 Grain size analysis of core6 sample 4

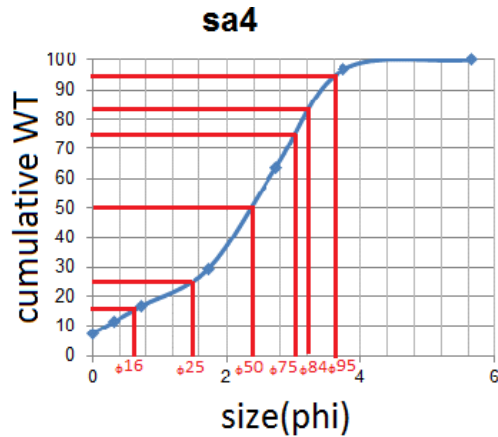

Fig.S21-4 cumulative weight with grain size in Phi unit of core 6sample no.4

| size             | WT %           | Cumulative WT % |
|------------------|----------------|-----------------|
| 0                | 21.232         | 21.232          |
| 0.321928         | 3.486          | 24.718          |
| 0.736965         | 4.22           | 28.938          |
| 1.736966         | 13.023         | 41.961          |
| 2.736966         | 39.06          | 81.021          |
| 3.736966         | 16.889         | 97.91           |
| 5.64385619       | 2.09           | 100             |
| <b>Mean size</b> | <b>sorting</b> |                 |
| 2.792303         | 6.09195        |                 |

Table S18-5 Grain size analysis of core6 sample 5

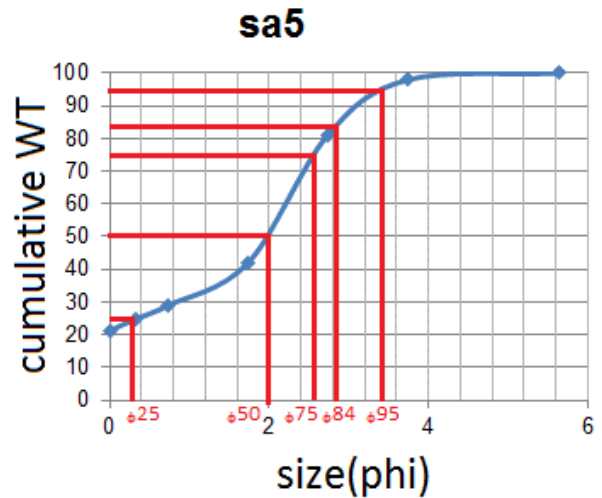

Fig.S21-5 cumulative weight with grain size in Phi unit of core 6sample no.5

| size             | WT %           | cumulative WT % |
|------------------|----------------|-----------------|
| 0                | 5.714          | 5.714           |
| 0.321928         | 1.877          | 7.591           |
| 0.736965         | 3.492          | 11.083          |
| 1.736966         | 8.056          | 19.139          |
| 2.736966         | 7.149          | 26.288          |
| 3.736966         | 50.041         | 76.329          |
| 5.64385619       | 23.571         | 99.9            |
| <b>Mean size</b> | <b>sorting</b> |                 |
| 5.77684          | 7.746483       |                 |

Table S18-6 Grain size analysis of core6 sample 6

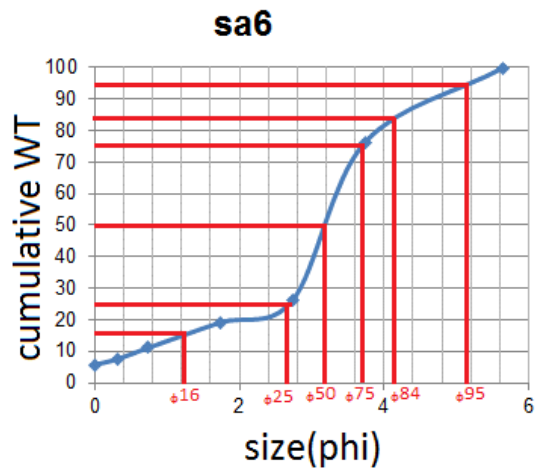

Fig.S21-6 cumulative weight with grain size in Phi unit of core 6sample no.6

| size             | WT %           | cumulative WT % |
|------------------|----------------|-----------------|
| 0                | 6.71           | 6.71            |
| 0.321928         | 4.838          | 11.548          |
| 0.736965         | 7.451          | 18.999          |
| 1.736966         | 18.138         | 37.137          |
| 2.736966         | 19.345         | 56.482          |
| 3.736966         | 20.685         | 77.167          |
| 5.64385619       | 22.833         | 100             |
| <b>Mean size</b> | <b>sorting</b> |                 |
| 4.407733         | 8.591306       |                 |

Table S18-7 Grain size analysis of core6 sample 7

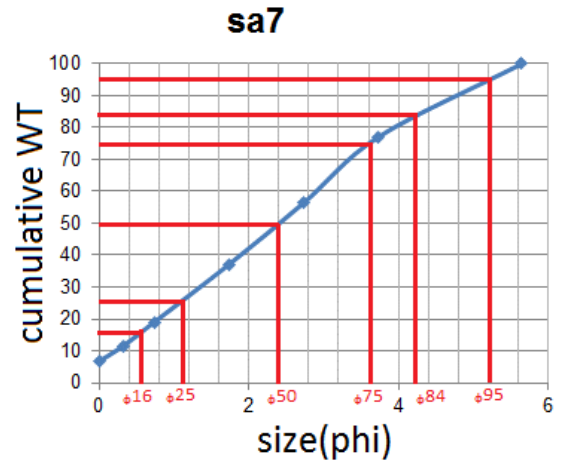

Fig.S21-7 cumulative weight with grain size in Phi unit of core 6sample no.7

| size             | WT %           | cumulative WT % |
|------------------|----------------|-----------------|
| 0                | 12.974         | 12.974          |
| 0.321928         | 3.688          | 16.662          |
| 0.736965         | 5.139          | 21.801          |
| 1.736966         | 13.819         | 35.62           |
| 2.736966         | 19.25          | 54.87           |
| 3.736966         | 23.246         | 78.116          |
| 5.64385619       | 21.884         | 100             |
| <b>Mean size</b> | <b>sorting</b> |                 |
| 4.124667         | 8.556376       |                 |

Table S18-8 Grain size analysis of core6 sample 8

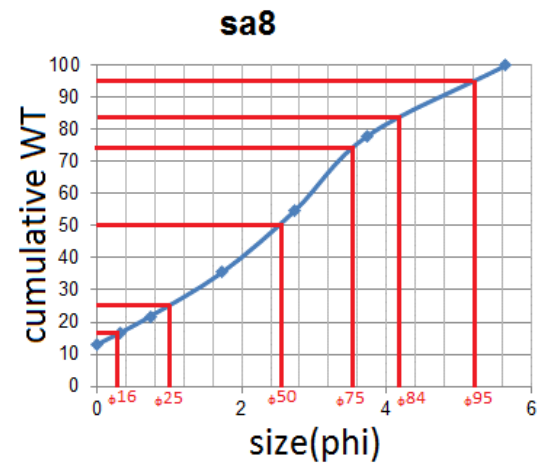

Fig.S21-8 cumulative weight with grain size in Phi unit of core 6sample no.8



| size             | WT %           | cumulative WT % |
|------------------|----------------|-----------------|
| 0                | 20.926         | 20.926          |
| 0.321928         | 5.227          | 26.153          |
| 0.736965         | 9.033          | 35.186          |
| 1.736966         | 23.875         | 59.061          |
| 2.736966         | 25.999         | 85.06           |
| 3.736966         | 10.568         | 95.628          |
| 5.64385619       | 4.372          | 100             |
| <b>Mean size</b> | <b>sorting</b> |                 |
| 2.126867         | 6.011352       |                 |

Table S18-9 Grain size analysis of core6 sample 9

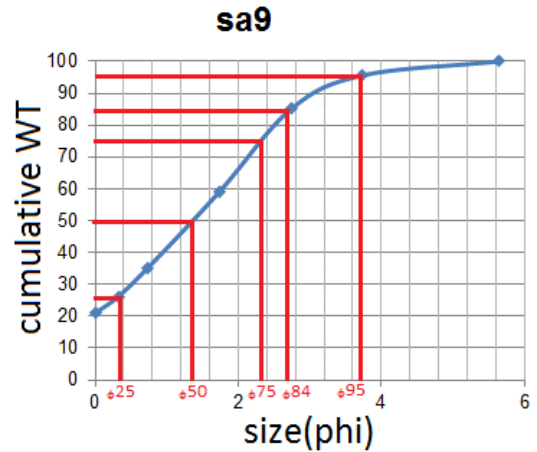

Fig.S21-8 cumulative weight with grain size in Phi unit of core 6sample no.8

| size             | WT %           | cumulative WT % |
|------------------|----------------|-----------------|
| 0                | 8.888          | 8.888           |
| 0.321928         | 5.284          | 14.172          |
| 0.736965         | 7.095          | 21.267          |
| 1.736966         | 18.871         | 40.138          |
| 2.736966         | 34.261         | 74.399          |
| 3.736966         | 22.765         | 97.164          |
| 5.64385619       | 2.836          | 100             |
| <b>Mean size</b> | <b>sorting</b> |                 |
| 2.158133         | 5.641148       |                 |

Table S18-10 Grain size analysis of core6 sample 10

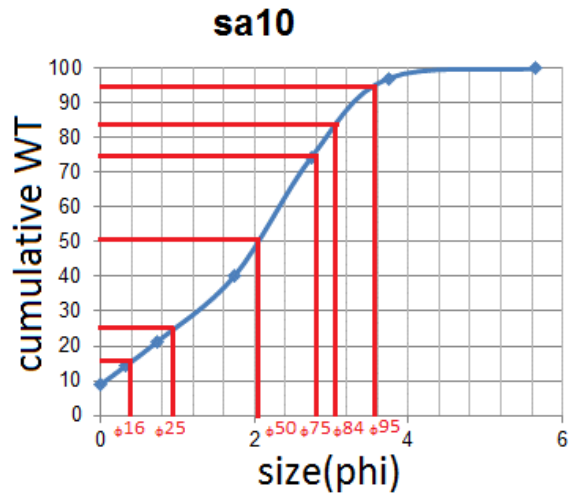

Fig.S21-10 cumulative weight with grain size in Phi unit of core 6sample no.10

| size             | WT%            | cumulative WT% |
|------------------|----------------|----------------|
| 0                | 19.705         | 19.705         |
| 0.321928         | 4.66           | 24.365         |
| 0.736965         | 5.441          | 29.806         |
| 1.736966         | 12.106         | 41.912         |
| 2.736966         | 12.109         | 54.021         |
| 3.736966         | 22.004         | 76.025         |
| 5.64385619       | 23.975         | 100            |
| <b>Mean size</b> | <b>sorting</b> |                |
| 3.559667         | 8.908765       |                |

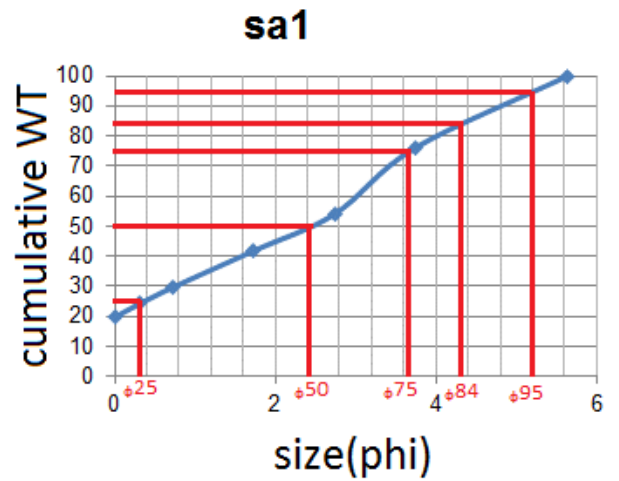

Table S19-1 Grain size analysis of core7 sample 1

Fig.S22-1 cumulative weight with grain size in Phi unit of core 7 sample no.1

| size             | WT %           | cumulative WT % |
|------------------|----------------|-----------------|
| 0                | 1.479          | 1.479           |
| 0.321928         | 1.991          | 3.47            |
| 0.736965         | 3.739          | 7.209           |
| 1.736966         | 18.045         | 25.254          |
| 2.736966         | 24.221         | 49.475          |
| 3.736966         | 26.999         | 76.474          |
| 5.64385619       | 23.526         | 100             |
| <b>Mean size</b> | <b>sorting</b> |                 |
| 5.427333         | 8.258818       |                 |

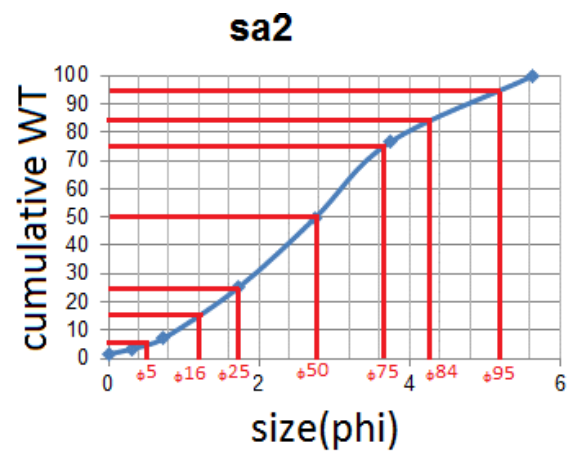

Table S19-2 Grain size analysis of core7 sample 2

Fig.S22-2 cumulative weight with grain size in Phi unit of core 7 sample no.2

| size             | WT %           | cumulative WT % |
|------------------|----------------|-----------------|
| 0                | 7.745          | 7.745           |
| 0.321928         | 4.267          | 12.012          |
| 0.736965         | 6.528          | 18.54           |
| 1.736966         | 14.631         | 33.171          |
| 2.736966         | 16.548         | 49.719          |
| 3.736966         | 31.631         | 81.35           |
| 5.64385619       | 18.65          | 100             |
| <b>Mean size</b> | <b>sorting</b> |                 |
| 4.609333         | 7.874689       |                 |

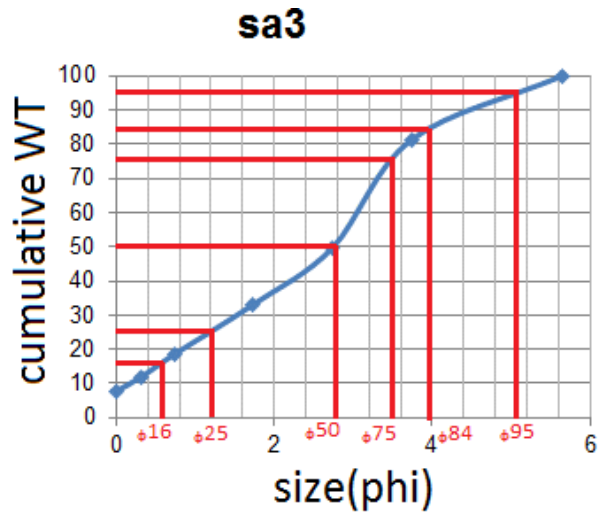

Table S19-3 Grain size analysis of core 7 sample 3

Fig.S22-3cumulative weight with grain size in Phi unit of core 7 sample no.3

| size             | WT %           | cumulative WT % |
|------------------|----------------|-----------------|
| 0                | 5.017          | 5.017           |
| 0.321928         | 5.279          | 10.296          |
| 0.736965         | 9.404          | 19.7            |
| 1.736966         | 20.586         | 40.286          |
| 2.736966         | 22.231         | 62.517          |
| 3.736966         | 21.633         | 84.15           |
| 5.64385619       | 15.85          | 100             |
| <b>Mean size</b> | <b>sorting</b> |                 |
| 4.035333         | 7.772455       |                 |

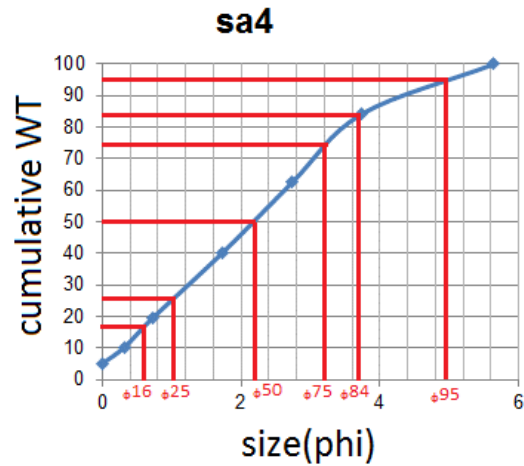

Table S19-4 Grain size analysis of core7 sample 4

Fig.S22-4cumulative weight with grain size in Phi unit of core 7 sample no.4

| size             | WT %           | cumulative WT % |
|------------------|----------------|-----------------|
| 0                | 16.421         | 16.421          |
| 0.321928         | 6.253          | 22.674          |
| 0.736965         | 6.933          | 29.607          |
| 1.736966         | 14.186         | 43.793          |
| 2.736966         | 25.079         | 68.872          |
| 3.736966         | 20.125         | 88.997          |
| 5.64385619       | 11.003         | 100             |
| <b>Mean size</b> | <b>sorting</b> |                 |
| 3.146333         | 7.327932       |                 |

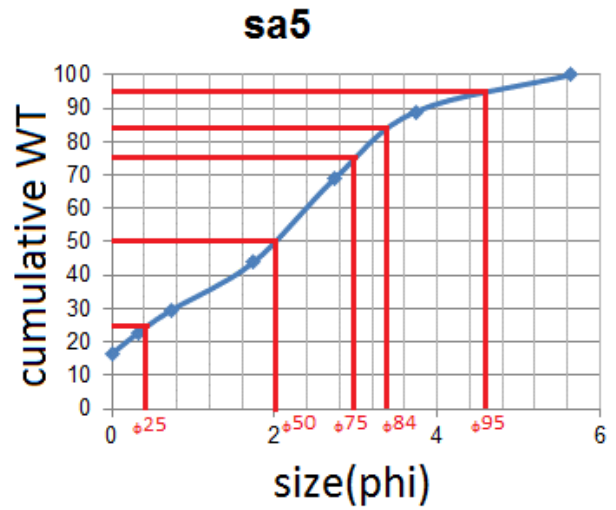

Table S19-5 Grain size analysis of core7 sample 5

Fig.S22-5cumulative weight with grain size in Phi unit of core 7 sample no.5

| size             | WT %           | cumulative WT % |
|------------------|----------------|-----------------|
| 0                | 17.089         | 17.089          |
| 0.321928         | 4.37           | 21.459          |
| 0.736965         | 5.675          | 27.134          |
| 1.736966         | 14.06          | 41.194          |
| 2.736966         | 19.277         | 60.471          |
| 3.736966         | 21.661         | 82.132          |
| 5.64385619       | 17.868         | 100             |
| <b>Mean size</b> | <b>sorting</b> |                 |
| 3.145            | 7.283932       |                 |

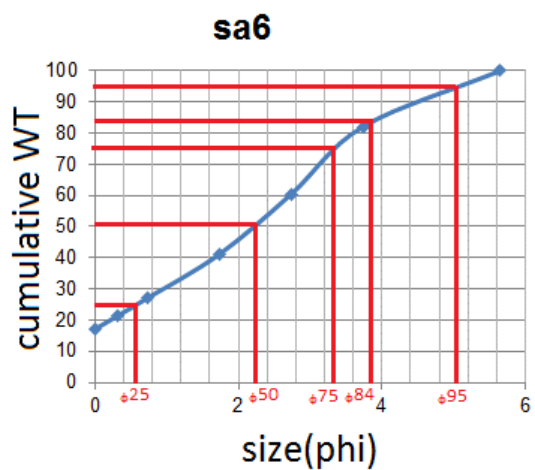

Table S19-6 Grain size analysis of core7 sample 6

Fig.S22-6cumulative weight with grain size in Phi unit of core 7 sample no.6

| size             | WT %           | cumulative WT % |
|------------------|----------------|-----------------|
| 0                | 2.677          | 2.677           |
| 0.321928         | 2.189          | 4.866           |
| 0.736965         | 4.133          | 8.999           |
| 1.736966         | 12.959         | 21.958          |
| 2.736966         | 35.526         | 57.484          |
| 3.736966         | 38.678         | 96.162          |
| 5.64385619       | 3.838          | 100             |
| <b>Mean size</b> | <b>sorting</b> |                 |
| 5.089            | 6.445371       |                 |

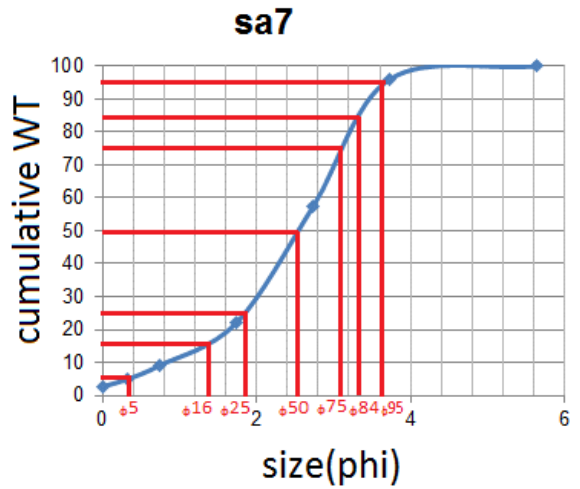

Table S19-7 Grain size analysis of core7 sample 7

Fig.S22-7cumulative weight with grain size in Phi unit of core 7 sample no.7

| size             | WT %           | Cumulative WT % |
|------------------|----------------|-----------------|
| 0                | 3.342          | 3.342           |
| 0.321928         | 2.276          | 5.618           |
| 0.736965         | 4.229          | 9.847           |
| 1.736966         | 16.873         | 26.72           |
| 2.736966         | 45.967         | 72.687          |
| 3.736966         | 25.797         | 98.484          |
| 5.64385619       | 1.516          | 100             |
| <b>Mean size</b> | <b>sorting</b> |                 |
| 4.566333         | 5.950106       |                 |

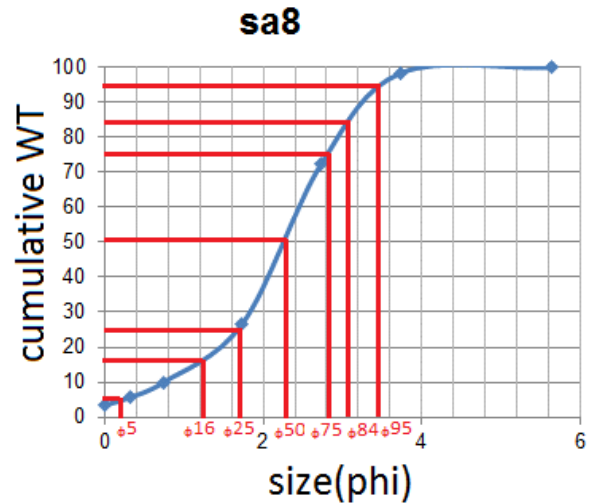

Table S19-8 Grain size analysis of core7 sample 8

Fig.S22-8cumulative weight with grain size in Phi unit of core 7 sample no.8

| size             | WT %           | Cumulative WT % |
|------------------|----------------|-----------------|
| 0                | 20.675         | 20.675          |
| 0.321928         | 5.094          | 25.769          |
| 0.736965         | 5.709          | 31.478          |
| 1.736966         | 13.476         | 44.954          |
| 2.736966         | 17.944         | 62.898          |
| 3.736966         | 20.785         | 83.683          |
| 5.64385619       | 16.317         | 100             |
| <b>Mean size</b> | <b>sorting</b> |                 |
| 2.936667         | 8.100682       |                 |

Table S20-1 Grain size analysis of core8 sample 1

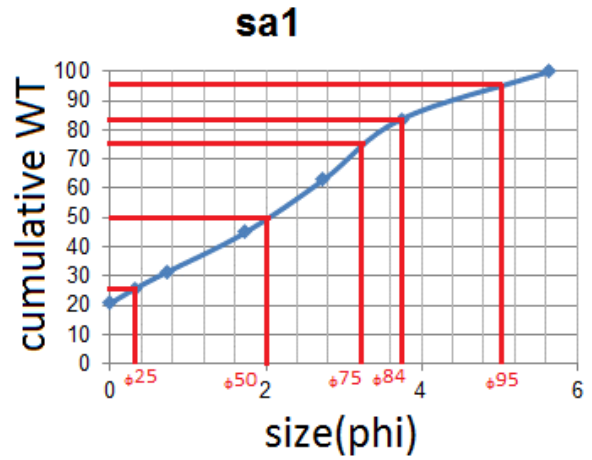

Fig.S23-1 cumulative weight with grain size in Phi unit of core 8 sample no.1

| size             | WT %           | cumulative WT % |
|------------------|----------------|-----------------|
| 0                | 11.854         | 11.854          |
| 0.321928         | 5.719          | 17.573          |
| 0.736965         | 7.968          | 25.541          |
| 1.736966         | 17.606         | 43.147          |
| 2.736966         | 19.204         | 62.351          |
| 3.736966         | 25.493         | 87.844          |
| 5.64385619       | 12.156         | 100             |
| <b>Mean size</b> | <b>sorting</b> |                 |
| 3.563333         | 7.391894       |                 |

Table S20-2 Grain size analysis of core8 sample 2

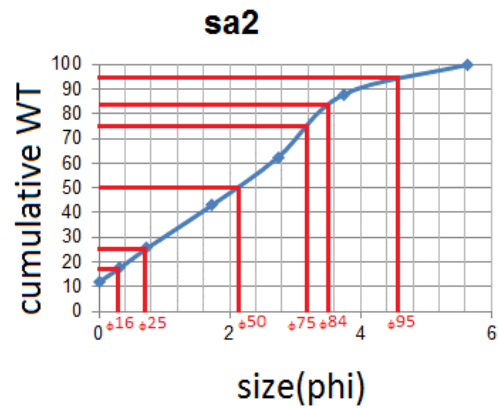

Fig.S23-2 cumulative weight with grain size in Phi unit of core 8 sample no.2

| size             | WT %           | cumulative WT % |
|------------------|----------------|-----------------|
| 0                | 12.99          | 12.99           |
| 0.321928         | 5.506          | 18.496          |
| 0.736965         | 7.494          | 25.99           |
| 1.736966         | 16.485         | 42.475          |
| 2.736966         | 20.307         | 62.782          |
| 3.736966         | 23.481         | 86.263          |
| 5.64385619       | 13.737         | 100             |
| <b>Mean size</b> | <b>sorting</b> |                 |
| 3.54             | 7.601212       |                 |

Table S20-3 Grain size analysis of core8 sample 3

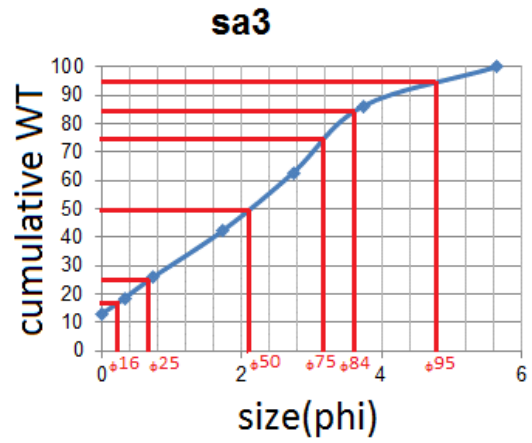

Fig.S23-3 cumulative weight with grain size in Phi unit of core 8 sample no.3

| size             | WT %           | cumulative WT % |
|------------------|----------------|-----------------|
| 0                | 5.575          | 5.575           |
| 0.321928         | 5.022          | 10.597          |
| 0.736965         | 10.469         | 21.066          |
| 1.736966         | 28.401         | 49.467          |
| 2.736966         | 20.078         | 69.545          |
| 3.736966         | 15.339         | 84.884          |
| 5.64385619       | 15.116         | 100             |
| <b>Mean size</b> | <b>sorting</b> |                 |
| 3.53             | 7.738227       |                 |

Table S20-4 Grain size analysis of core8 sample 4

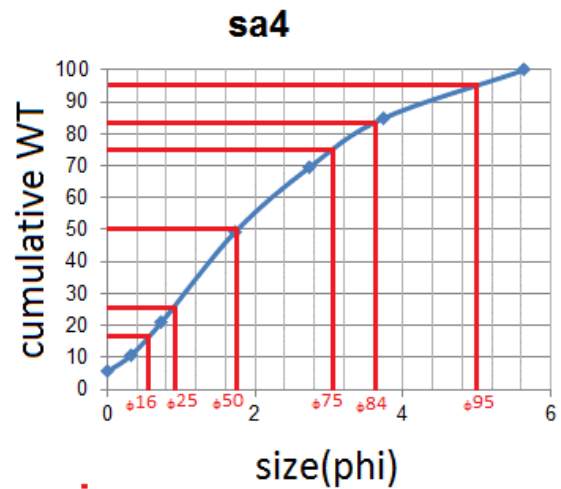

Fig.S23-4 cumulative weight with grain size in Phi unit of core 8 sample no.4

| size             | WT %           | cumulative WT % |
|------------------|----------------|-----------------|
| 0                | 7.791          | 7.791           |
| 0.321928         | 2.314          | 10.105          |
| 0.736965         | 3.58           | 13.685          |
| 1.736966         | 13.61          | 27.295          |
| 2.736966         | 40.906         | 68.201          |
| 3.736966         | 22.597         | 90.798          |
| 5.64385619       | 9.202          | 100             |
| <b>Mean size</b> | <b>sorting</b> |                 |
| 4.473            | 6.872477       |                 |

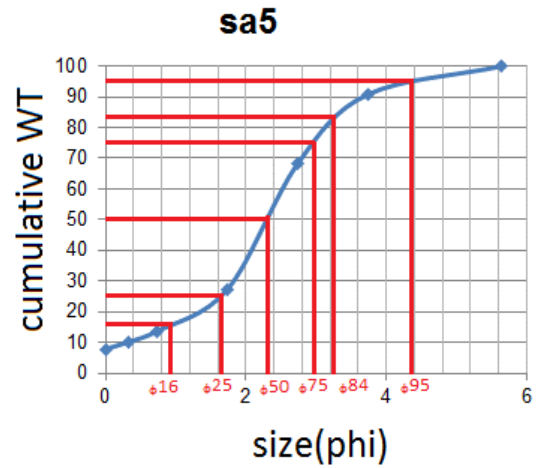

Table S20-5 Grain size analysis of core8 sample 5

Fig.S23-5 cumulative weight with grain size in Phi unit of core 8 sample no.5

| size             | WT %           | cumulative WT % |
|------------------|----------------|-----------------|
| 0                | 2.102          | 2.102           |
| 0.321928         | 1.637          | 3.739           |
| 0.736965         | 3.341          | 7.08            |
| 1.736966         | 14.67          | 21.75           |
| 2.736966         | 41.881         | 63.631          |
| 3.736966         | 27.373         | 91.004          |
| 5.64385619       | 8.996          | 100             |
| <b>Mean size</b> | <b>sorting</b> |                 |
| 5.066            | 6.644068       |                 |

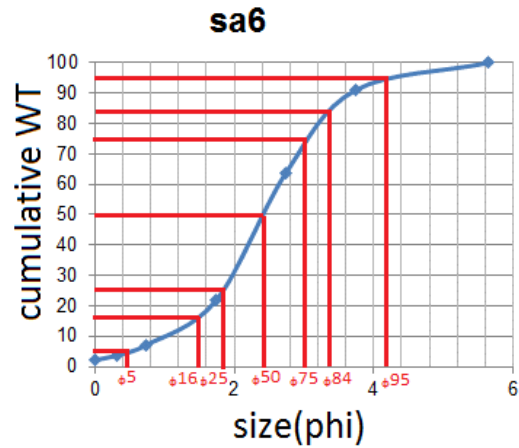

Table S20-6 Grain size analysis of core8 sample 6

Fig.S23-6 cumulative weight with grain size in Phi unit of core 8 sample no.6



| size             | WT %           | cumulative WT % |
|------------------|----------------|-----------------|
| 0                | 2.811          | 2.811           |
| 0.321928         | 2.381          | 5.192           |
| 0.736965         | 4.761          | 9.953           |
| 1.736966         | 18.791         | 28.744          |
| 2.736966         | 36.495         | 65.239          |
| 3.736966         | 24.988         | 90.227          |
| 5.64385619       | 9.773          | 100             |
| <b>Mean size</b> | <b>sorting</b> |                 |
| 4.643333         | 6.827212       |                 |

Table S2o-7 Grain size analysis of core8 sample 7

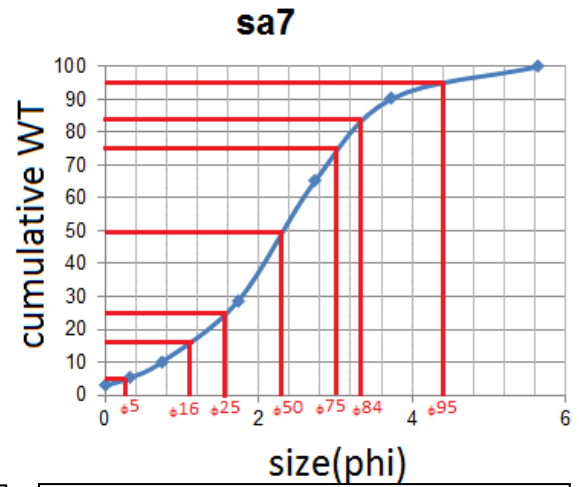

Fig.S23-7 cumulative weight with grain size in Phi unit of core 8 sample no.7

| size             | WT %           | cumulative WT % |
|------------------|----------------|-----------------|
| 0                | 4.576          | 4.576           |
| 0.321928         | 4.191          | 8.767           |
| 0.736965         | 7.763          | 16.53           |
| 1.736966         | 24.216         | 40.746          |
| 2.736966         | 30.117         | 70.863          |
| 3.736966         | 19.961         | 90.824          |
| 5.64385619       | 9.176          | 100             |
| <b>Mean size</b> | <b>sorting</b> |                 |
| 3.853667         | 6.859189       |                 |

Table S2o-8 Grain size analysis of core8 sample 8

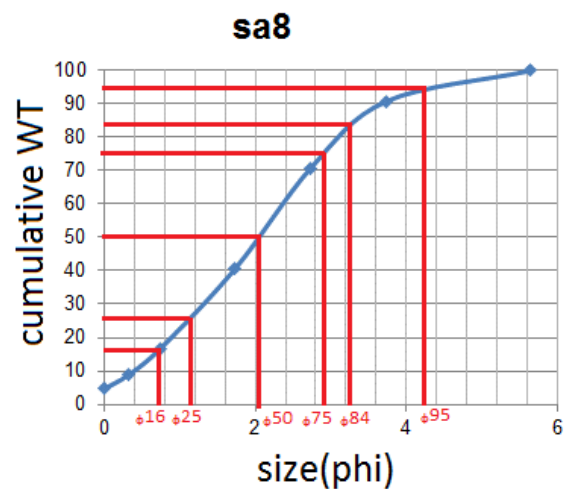

Fig.S23-8 cumulative weight with grain size in Phi unit of core 8 sample no.8

| size             | WT %           | cumulative WT % |
|------------------|----------------|-----------------|
| 0                | 5.259          | 5.259           |
| 0.321928         | 4.712          | 9.971           |
| 0.736965         | 8.533          | 18.504          |
| 1.736966         | 23.677         | 42.181          |
| 2.736966         | 31.706         | 73.887          |
| 3.736966         | 18.695         | 92.582          |
| 5.64385619       | 7.418          | 100             |
| <b>Mean size</b> | <b>sorting</b> |                 |
| 3.786667         | 6.868432       |                 |

Table S20-9 Grain size analysis of core8 sample 9

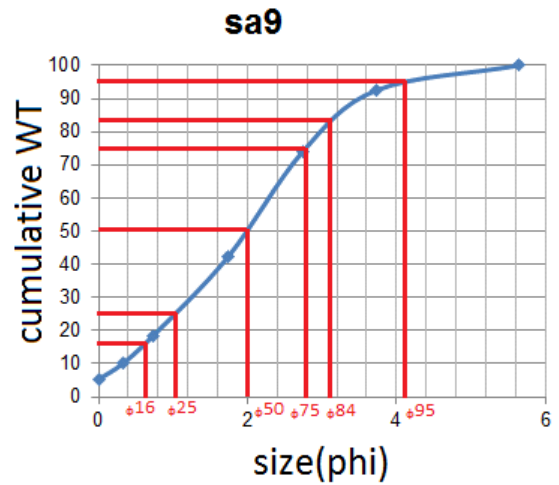

Fig.S23-9 cumulative weight with grain size in Phi unit of core 8 sample no.9

| size             | WT %           | cumulative WT % |
|------------------|----------------|-----------------|
| 0                | 47.888         | 47.888          |
| 0.321928         | 15.571         | 63.459          |
| 0.736965         | 10.567         | 74.026          |
| 1.736966         | 12.851         | 86.877          |
| 2.736966         | 8.662          | 95.539          |
| 3.736966         | 4.116          | 99.655          |
| 5.64385619       | 0.615          | 100.27          |
| <b>Mean size</b> | <b>sorting</b> |                 |
| 0.343667         | 3.553182       |                 |

Table S20-10 Grain size analysis of core8 sample 10

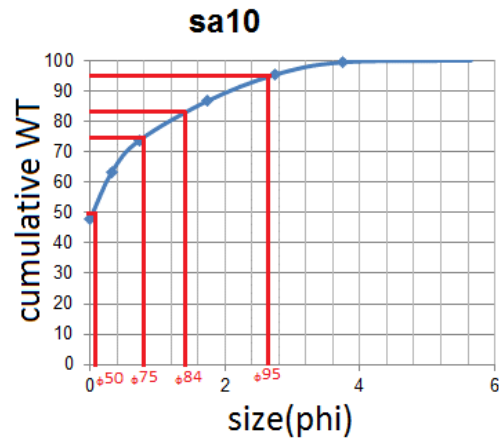

Fig.S23-10 cumulative weight with grain size in Phi unit of core 8 sample no.10

| size             | WT %           | cumulative WT % |
|------------------|----------------|-----------------|
| 0                | 30             | 30              |
| 0.321928         | 3.948          | 33.948          |
| 0.736965         | 6              | 39.948          |
| 1.736966         | 1.616          | 41.564          |
| 2.736966         | 17.006         | 58.57           |
| 3.736966         | 17.14          | 75.71           |
| 5.64385619       | 24.29          | 100             |
| <b>Mean size</b> | <b>sorting</b> |                 |
| 3.281333         | 9.046121       |                 |

Table S21-1 Grain size analysis of core 9 sample 1

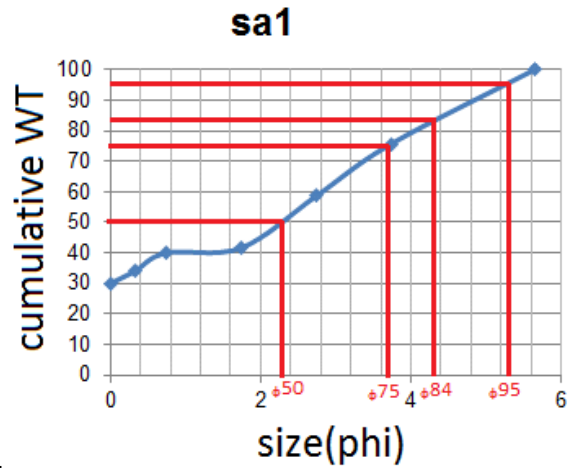

Fig.S24-1 cumulative weight with grain size in Phi unit of core 9 sample no.1

| size             | WT %           | cumulative WT % |
|------------------|----------------|-----------------|
| 0                | 2.866          | 2.866           |
| 0.321928         | 1.744          | 4.61            |
| 0.736965         | 2.286          | 6.896           |
| 1.736966         | 7.879          | 14.775          |
| 2.736966         | 8.924          | 23.699          |
| 3.736966         | 36.107         | 59.806          |
| 5.64385619       | 40.194         | 100             |
| <b>Mean size</b> | <b>sorting</b> |                 |
| 7.052333         | 8.930379       |                 |

Table S21-2 Grain size analysis of core 9 sample 2

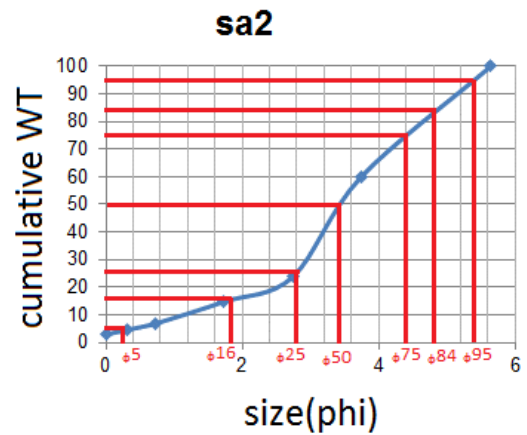

Fig.S24-2 cumulative weight with grain size in Phi unit of core 9 sample no.2

| size             | WT %           | Cumulative WT % |
|------------------|----------------|-----------------|
| 0                | 1.922          | 1.922           |
| 0.321928         | 0.988          | 2.91            |
| 0.736965         | 2.487          | 5.397           |
| 1.736966         | 22.663         | 28.06           |
| 2.736966         | 62.407         | 90.467          |
| 3.736966         | 7.156          | 97.623          |
| 5.64385619       | 2.377          | 100             |
| <b>Mean size</b> | <b>sorting</b> |                 |
| 4.39             | 4.889439       |                 |

Table S21-3 Grain size analysis of core 9 sample 3

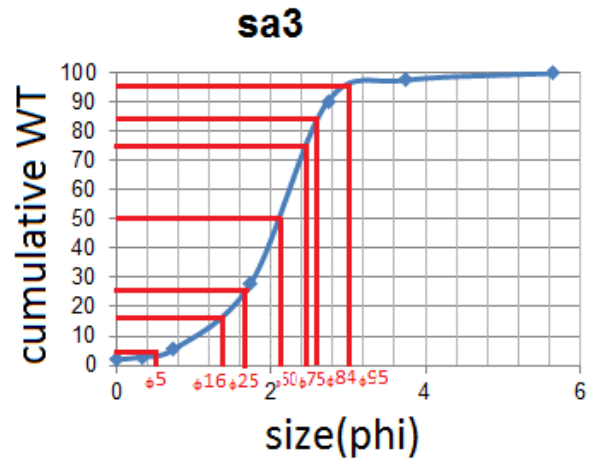

Fig.S24-3 cumulative weight with grain size in Phi unit of core 9 sample no.3

| size             | WT %           | cumulative WT % |
|------------------|----------------|-----------------|
| 0                | 13.306         | 13.306          |
| 0.321928         | 7.608          | 20.914          |
| 0.736965         | 9.232          | 30.146          |
| 1.736966         | 17.168         | 47.314          |
| 2.736966         | 13.067         | 60.381          |
| 3.736966         | 25.112         | 85.493          |
| 5.64385619       | 14.507         | 100             |
| <b>Mean size</b> | <b>sorting</b> |                 |
| 3.279            | 7.672144       |                 |

Table S21-4 Grain size analysis of core 9 sample 4

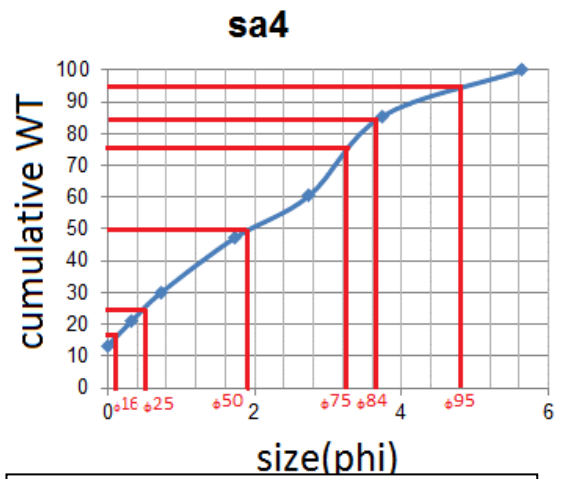

Fig.S24-4 cumulative weight with grain size in Phi unit of core 9 sample no.4

| size             | WT %           | cumulative WT % |
|------------------|----------------|-----------------|
| 0                | 5.608          | 5.608           |
| 0.321928         | 3.922          | 9.53            |
| 0.736965         | 5.718          | 15.248          |
| 1.736966         | 18.1           | 33.348          |
| 2.736966         | 28.262         | 61.61           |
| 3.736966         | 21.006         | 82.616          |
| 5.64385619       | 17.384         | 100             |
| <b>Mean size</b> | <b>sorting</b> |                 |
| 4.378333         | 8.00303        |                 |

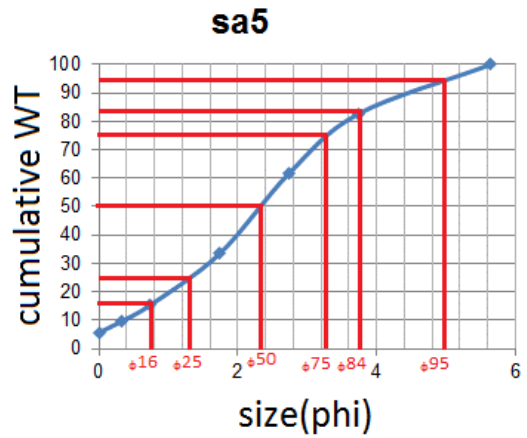

Table S21-5 Grain size analysis of core 9 sample 5

Fig.S24-5 cumulative weight with grain size in Phi unit of core 9 sample no.5

| size             | WT %           | cumulative WT % |
|------------------|----------------|-----------------|
| 0                | 3.909          | 3.909           |
| 0.321928         | 2.029          | 5.938           |
| 0.736965         | 3.91           | 9.848           |
| 1.736966         | 17.192         | 27.04           |
| 2.736966         | 46.686         | 73.726          |
| 3.736966         | 24.519         | 98.245          |
| 5.64385619       | 1.755          | 100             |
| <b>Mean size</b> | <b>sorting</b> |                 |
| 4.378333         | 7.94303        |                 |

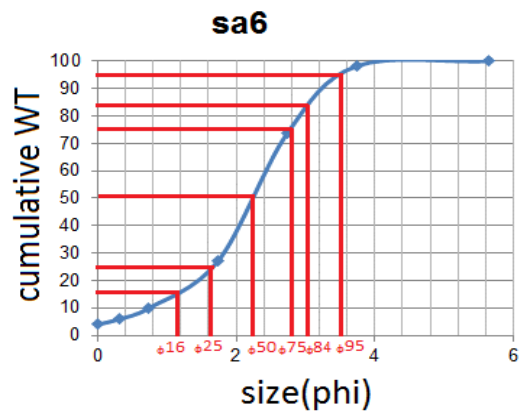

Table S21-6 Grain size analysis of core 9 sample 6

Fig.S24-6 cumulative weight with grain size in Phi unit of core 9 sample no.6

| size             | WT %           | cumulative WT % |
|------------------|----------------|-----------------|
| 0                | 1.839          | 1.839           |
| 0.321928         | 1.448          | 3.287           |
| 0.736965         | 2.941          | 6.228           |
| 1.736966         | 18.49          | 24.718          |
| 2.736966         | 52.466         | 77.184          |
| 3.736966         | 13.853         | 91.037          |
| 5.64385619       | 8.963          | 100             |
| <b>Mean size</b> | <b>sorting</b> |                 |
| 4.645667         | 5.921045       |                 |

Table S21-7 Grain size analysis of core 9 sample 7

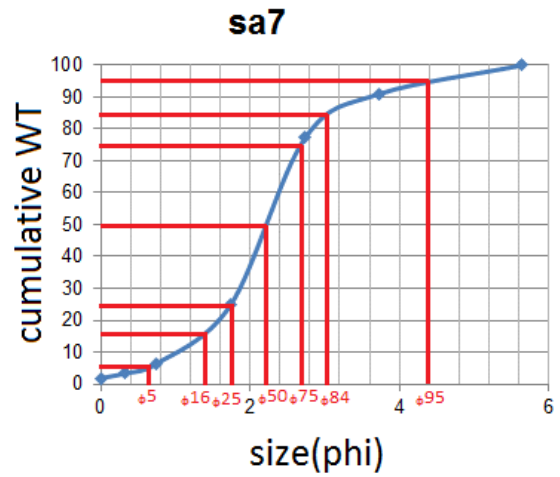

Fig.S24-7 cumulative weight with grain size in Phi unit of core 9 sample no.7

| size             | WT %           | cumulative WT % |
|------------------|----------------|-----------------|
| 0                | 0.434          | 0.434           |
| 0.321928         | 0.639          | 1.073           |
| 0.736965         | 2.108          | 3.181           |
| 1.736966         | 22.012         | 25.193          |
| 2.736966         | 67.129         | 92.322          |
| 3.736966         | 4.206          | 96.528          |
| 5.64385619       | 3.472          | 100             |
| <b>Mean size</b> | <b>sorting</b> |                 |
| 4.746667         | 6.8925         |                 |

Table S21-8 Grain size analysis of core 9 sample 8

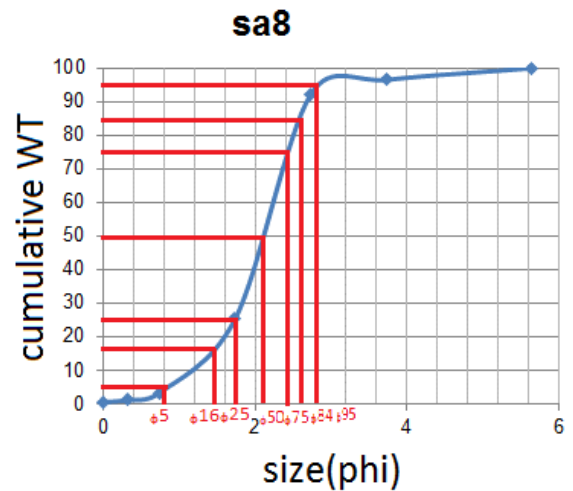

Fig.S24-8 cumulative weight with grain size in Phi unit of core 9 sample no.8

| size             | WT %           | cumulative WT % |
|------------------|----------------|-----------------|
| 0                | 1.408          | 1.408           |
| 0.321928         | 1.524          | 2.932           |
| 0.736965         | 3.903          | 6.835           |
| 1.736966         | 30.593         | 37.428          |
| 2.736966         | 56.744         | 94.172          |
| 3.736966         | 3.622          | 97.794          |
| 5.64385619       | 2.206          | 100             |
| <b>Mean size</b> | <b>sorting</b> |                 |
| 3.97             | 4.647561       |                 |

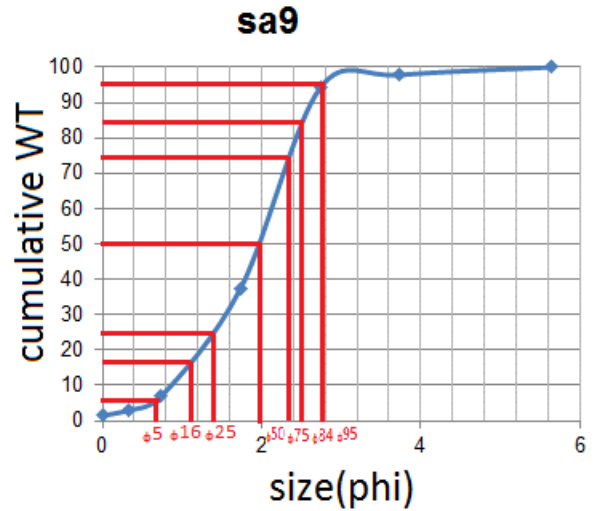

Table S21-9 Grain size analysis of core 9 sample 9

Fig.S24-9 cumulative weight with grain size in Phi unit of core 9 sample no.9

| size             | WT %           | cumulative WT % |
|------------------|----------------|-----------------|
| 0                | 3.509          | 3.509           |
| 0.321928         | 1.295          | 4.804           |
| 0.736965         | 2.69           | 7.494           |
| 1.736966         | 17.405         | 24.899          |
| 2.736966         | 47.067         | 71.966          |
| 3.736966         | 22.487         | 94.453          |
| 5.64385619       | 5.547          | 100             |
| <b>Mean size</b> | <b>sorting</b> |                 |
| 4.756            | 6.198659       |                 |

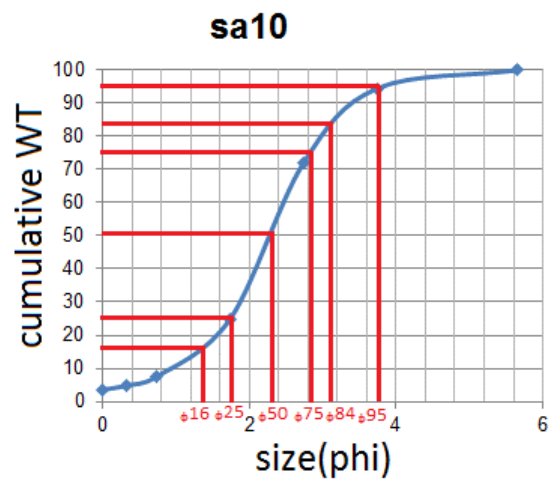

Table S21-10 Grain size analysis of core 9 sample 10

Fig.S24-10 cumulative weight with grain size in Phi unit of core 9 sample no.10

| size             | WT %           | cumulative WT % |
|------------------|----------------|-----------------|
| 0                | 3.315          | 3.315           |
| 0.321928         | 2.344          | 5.659           |
| 0.736965         | 4.935          | 10.594          |
| 1.736966         | 16.751         | 27.345          |
| 2.736966         | 44.147         | 71.492          |
| 3.736966         | 24.123         | 95.615          |
| 5.64385619       | 4.385          | 100             |
| <b>Mean size</b> | <b>sorting</b> |                 |
| 4.538533         | 6.145212       |                 |

Table S21-11 Grain size analysis of core 9 sample 11

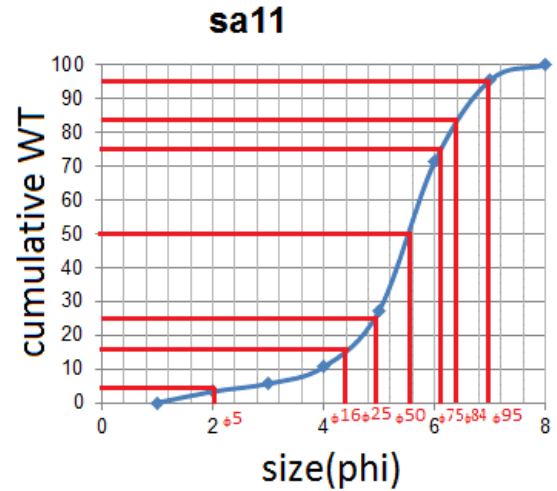

Fig.S24-11 cumulative weight with grain size in Phi unit of core 9 sample no.11

| size             | WT %           | cumulative WT % |
|------------------|----------------|-----------------|
| 0                | 6.218          | 6.218           |
| 0.321928         | 4.247          | 10.465          |
| 0.736965         | 5.447          | 15.912          |
| 1.736966         | 10.081         | 25.993          |
| 2.736966         | 6.807          | 32.8            |
| 3.736966         | 31.491         | 64.291          |
| 5.64385619       | 35.709         | 100             |
| <b>Mean size</b> | <b>sorting</b> |                 |
| 5.437333         | 9.155152       |                 |

Table S22-1 Grain size analysis of core 10 sample 1

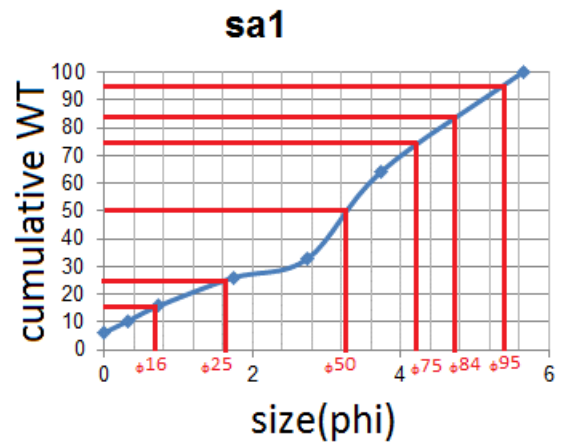

Fig.S25-1 cumulative weight with grain size in Phi unit of core 10 sample no.1



| size             | WT %           | cumulative WT % |
|------------------|----------------|-----------------|
| 0                | 11.452         | 11.452          |
| 0.321928         | 5.568          | 17.02           |
| 0.736965         | 7.146          | 24.166          |
| 1.736966         | 15.77          | 39.936          |
| 2.736966         | 15.462         | 55.398          |
| 3.736966         | 26.091         | 81.489          |
| 5.64385619       | 18.511         | 100             |
| <b>Mean size</b> | <b>sorting</b> |                 |
| 1290.38          | 8.093182       |                 |

Table S22-2 Grain size analysis of core 10 sample 2

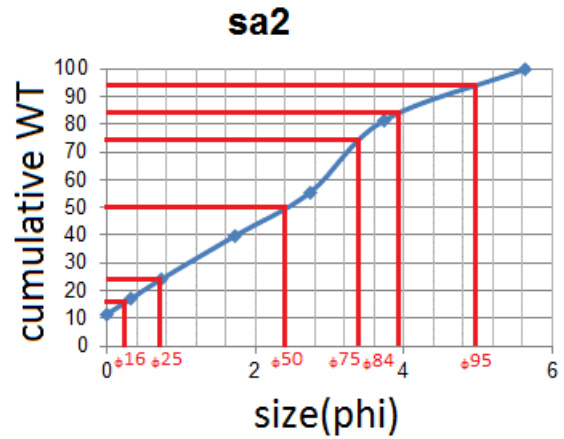

Fig.S25-2 cumulative weight with grain size in Phi unit of core 10 sample no.2

| size             | WT %           | cumulative WT % |
|------------------|----------------|-----------------|
| 0                | 10.549         | 10.549          |
| 0.321928         | 4.603          | 15.152          |
| 0.736965         | 6.955          | 22.107          |
| 1.736966         | 14.546         | 36.653          |
| 2.736966         | 17.9           | 54.553          |
| 3.736966         | 23.196         | 77.749          |
| 5.64385619       | 22.251         | 100             |
| <b>Mean size</b> | <b>sorting</b> |                 |
| 4.99             | 7.655432       |                 |

Table S22-3 Grain size analysis of core 10 sample 3

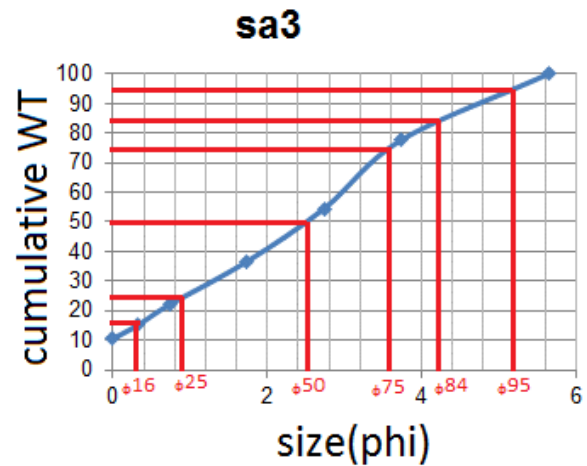

Fig.S25-3 cumulative weight with grain size in Phi unit of core 10 sample no.3

| size             | WT %           | cumulative WT % |
|------------------|----------------|-----------------|
| 0                | 13.758         | 13.758          |
| 0.321928         | 4.032          | 17.79           |
| 0.736965         | 5.453          | 23.243          |
| 1.736966         | 14.843         | 38.086          |
| 2.736966         | 19.629         | 57.715          |
| 3.736966         | 21.844         | 79.559          |
| 5.64385619       | 20.441         | 100             |
| <b>Mean size</b> | <b>sorting</b> |                 |
| 3.501667         | 7.650432       |                 |

Table S22-4 Grain size analysis of core 10 sample 4

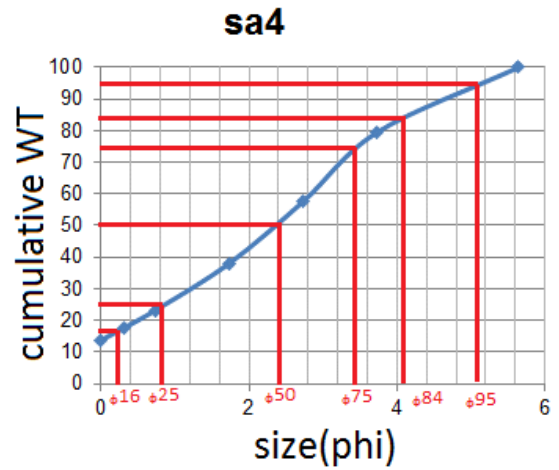

Fig.S25-4 cumulative weight with grain size in Phi unit of core 10 sample no.4

| size             | WT %           | cumulative WT % |
|------------------|----------------|-----------------|
| 0                | 10.065         | 10.065          |
| 0.321928         | 5.696          | 15.761          |
| 0.736965         | 9.239          | 25              |
| 1.736966         | 19.811         | 44.811          |
| 2.736966         | 20.169         | 64.98           |
| 3.736966         | 20.92          | 85.9            |
| 5.64385619       | 14.1           | 100             |
| <b>Mean size</b> | <b>sorting</b> |                 |
| 3.571333         | 7.642705       |                 |

Table S22-5 Grain size analysis of core 10 sample 5

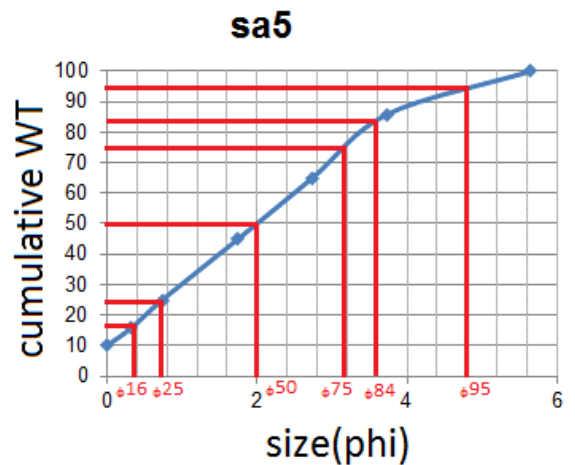

Fig.S25-5 cumulative weight with grain size in Phi unit of core 10 sample no.5

| size             | WT %           | cumulative WT % |
|------------------|----------------|-----------------|
| 0                | 22.967         | 22.967          |
| 0.321928         | 6.79           | 29.757          |
| 0.736965         | 8.252          | 38.009          |
| 1.736966         | 14.72          | 52.729          |
| 2.736966         | 11.574         | 64.303          |
| 3.736966         | 19.403         | 83.706          |
| 5.64385619       | 16.294         | 100             |
| <b>Mean size</b> | <b>sorting</b> |                 |
| 2.558            | 8.056432       |                 |

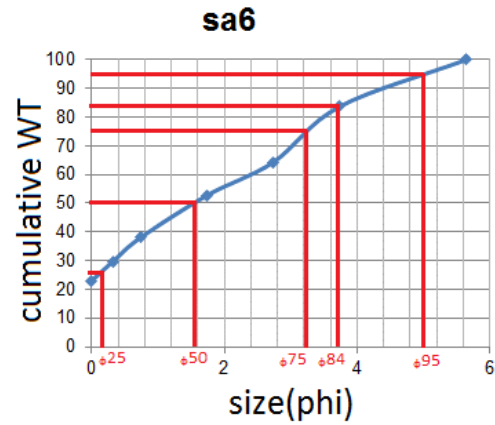

Table S22-6 Grain size analysis of core 10 sample 6

Fig.S25-6 cumulative weight with grain size in Phi unit of core 10 sample no.6

| size             | WT %           | cumulative WT % |
|------------------|----------------|-----------------|
| 0                | 22.427         | 22.427          |
| 0.321928         | 11.185         | 33.612          |
| 0.736965         | 13.982         | 47.594          |
| 1.736966         | 23.76          | 71.354          |
| 2.736966         | 12.991         | 84.345          |
| 3.736966         | 10.598         | 94.943          |
| 5.64385619       | 5.057          | 100             |
| <b>Mean size</b> | <b>sorting</b> |                 |
| 1.598333         | 5.682985       |                 |

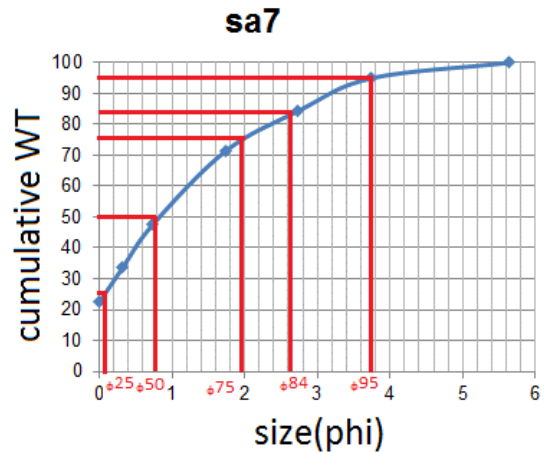

Table S22-7 Grain size analysis of core 10 sample 7

Fig.S25-7 cumulative weight with grain size in Phi unit of core 10 sample no.7

| size             | WT %           | cumulative WT % |
|------------------|----------------|-----------------|
| 0                | 5.061          | 5.061           |
| 0.321928         | 4.958          | 10.019          |
| 0.736965         | 8.251          | 18.27           |
| 1.736966         | 21.226         | 39.496          |
| 2.736966         | 36.676         | 76.172          |
| 3.736966         | 19.194         | 95.366          |
| 5.64385619       | 4.634          | 100             |
| <b>Mean size</b> | <b>sorting</b> |                 |
| 3.072667         | 6.393205       |                 |

Table S22-8 Grain size analysis of core 10 sample 8

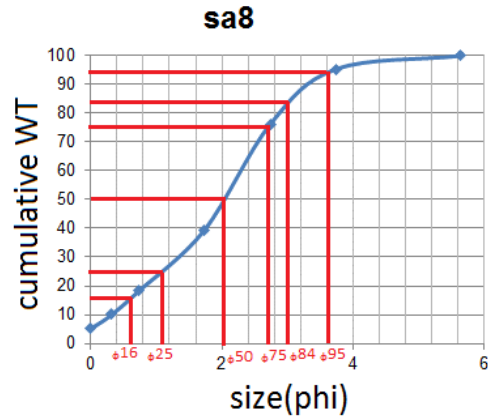

Fig.S25-8 cumulative weight with grain size in Phi unit of core 10 sample no.8

| size             | WT %           | cumulative WT % |
|------------------|----------------|-----------------|
| 0                | 5.049          | 5.049           |
| 0.321928         | 3.466          | 8.515           |
| 0.736965         | 6.746          | 15.261          |
| 1.736966         | 19.703         | 34.964          |
| 2.736966         | 34.84          | 69.804          |
| 3.736966         | 22.215         | 92.019          |
| 5.64385619       | 7.981          | 100             |
| <b>Mean size</b> | <b>sorting</b> |                 |
| 4.067333         | 6.683636       |                 |

Table S22-9 Grain size analysis of core 10 sample 9

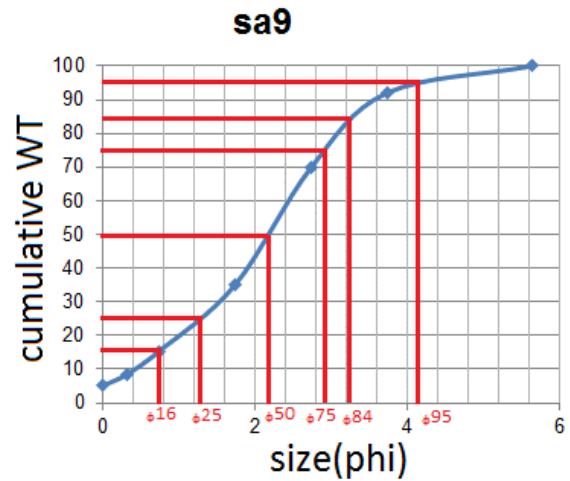

Fig.S25-9 cumulative weight with grain size in Phi unit of core 10 sample no.9

| size             | WT %           | cumulative WT % |
|------------------|----------------|-----------------|
| 0                | 5.379          | 5.379           |
| 0.321928         | 3.316          | 8.695           |
| 0.736965         | 5.837          | 14.532          |
| 1.736966         | 21.458         | 35.99           |
| 2.736966         | 39.146         | 75.136          |
| 3.736966         | 23.372         | 98.508          |
| 5.64385619       | 1.492          | 100             |
| <b>Mean size</b> | <b>sorting</b> |                 |
| 3.975667         | 6.014902       |                 |

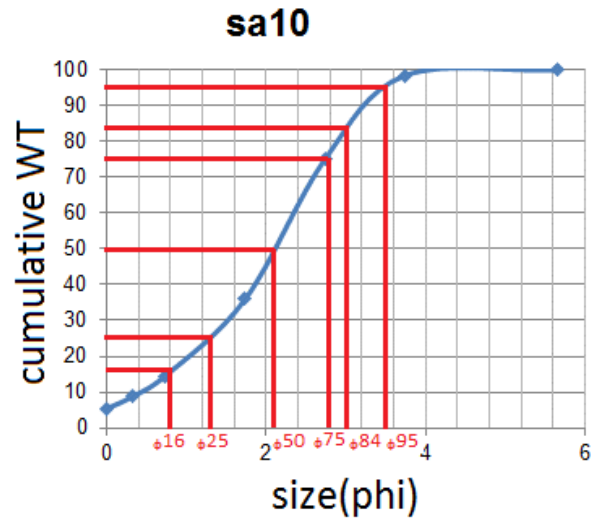

Table S22-10 Grain size analysis of core 10 sample 10

Fig.S25-10 cumulative weight with grain size in Phi unit of core 10 sample no.10

| size             | WT%            | cumulative WT% |
|------------------|----------------|----------------|
| 0                | 11.988         | 11.988         |
| 0.321928         | 4.821          | 16.809         |
| 0.736965         | 7.175          | 23.984         |
| 1.736966         | 23.451         | 47.435         |
| 2.736966         | 26.101         | 73.536         |
| 3.736966         | 15.357         | 88.893         |
| 5.64385619       | 11.107         | 100            |
| <b>Mean size</b> | <b>sorting</b> |                |
| 3.0551           | 7.308591       |                |

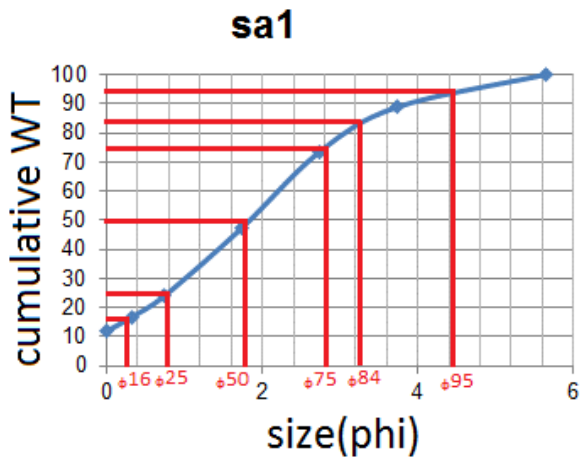

Table S23-1 Grain size analysis of core 11 sample 1

Fig.S26-1 cumulative weight with grain size in Phi unit of core 11 sample no.1

| size             | WT %           | cumulative WT % |
|------------------|----------------|-----------------|
| 0                | 10.002         | 10.002          |
| 0.321928         | 6.29           | 16.292          |
| 0.736965         | 11.833         | 28.125          |
| 1.736966         | 32.391         | 60.516          |
| 2.736966         | 23.359         | 83.875          |
| 3.736966         | 7.461          | 91.336          |
| 5.64385619       | 8.664          | 100             |
| <b>Mean size</b> | <b>sorting</b> |                 |
| 2.603333         | 6.83197        |                 |

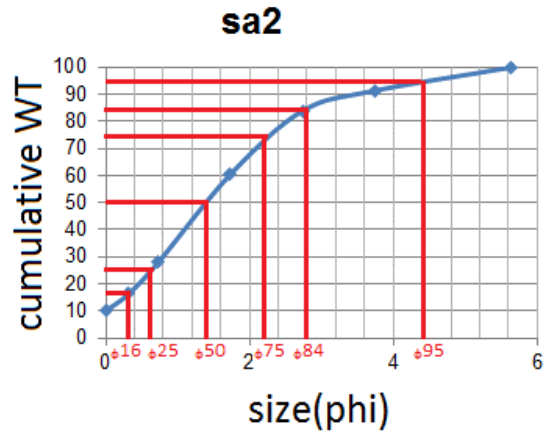

Table S23-2 Grain size analysis of core 11 sample 2

Fig.S26-2 cumulative weight with grain size in Phi unit of core 11 sample no.2

| size             | WT %           | cumulative WT % |
|------------------|----------------|-----------------|
| 0                | 10.086         | 10.086          |
| 0.321928         | 9.937          | 20.023          |
| 0.736965         | 15.85          | 35.873          |
| 1.736966         | 30.433         | 66.306          |
| 2.736966         | 12.631         | 78.937          |
| 3.736966         | 9.7            | 88.637          |
| 5.64385619       | 11.363         | 100             |
| <b>Mean size</b> | <b>sorting</b> |                 |
| 2.411333         | 6.962644       |                 |

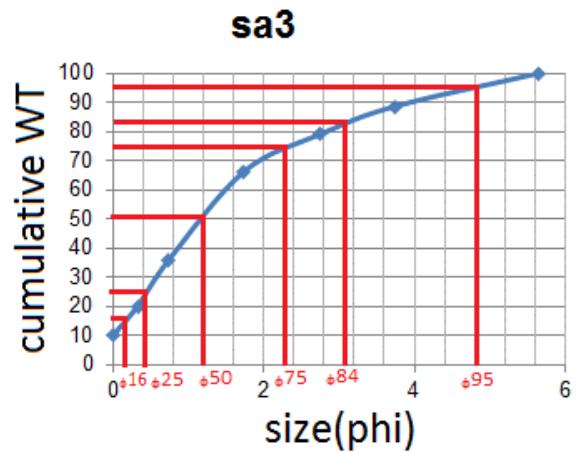

Table S23-3 Grain size analysis of core 11 sample 3

Fig.S26-3 cumulative weight with grain size in Phi unit of core 11 sample no.3

| size             | WT %           | cumulative WT % |
|------------------|----------------|-----------------|
| 0                | 21.078         | 21.078          |
| 0.321928         | 7.295          | 28.373          |
| 0.736965         | 10.255         | 38.628          |
| 1.736966         | 21.391         | 60.019          |
| 2.736966         | 12.408         | 72.427          |
| 3.736966         | 9.7            | 82.127          |
| 5.64385619       | 11.363         | 93.49           |
| <b>Mean size</b> | <b>sorting</b> |                 |
| 2.26             | 8.868258       |                 |

Table S23-4 Grain size analysis of core 11 sample 4

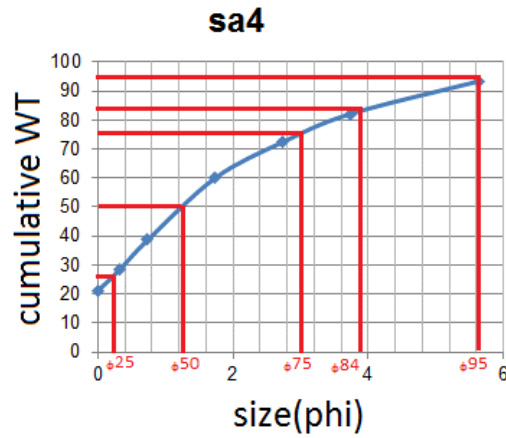

Fig.S26-4 cumulative weight with grain size in Phi unit of core 11 sample no.4

| size             | WT %           | cumulative WT % |
|------------------|----------------|-----------------|
| 0                | 40.677         | 40.677          |
| 0.321928         | 8.696          | 49.373          |
| 0.736965         | 10.204         | 59.577          |
| 1.736966         | 17.489         | 77.066          |
| 2.736966         | 10.146         | 87.212          |
| 3.736966         | 7.402          | 94.614          |
| 5.64385619       | 5.386          | 100             |
| <b>Mean size</b> | <b>sorting</b> |                 |
| 1.133333         | 5.394          |                 |

Table S23-5 Grain size analysis of core 11 sample 5

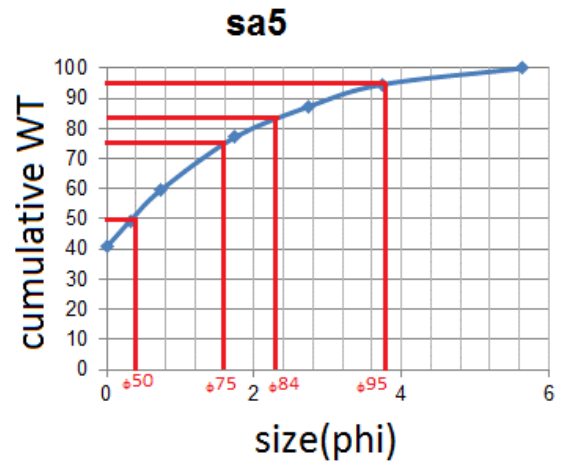

Fig.S26-5 cumulative weight with grain size in Phi unit of core 11 sample no.5

| size             | WT %           | cumulative WT % |
|------------------|----------------|-----------------|
| 0                | 0.848          | 0.848           |
| 0.321928         | 1.313          | 2.161           |
| 0.736965         | 4.696          | 6.857           |
| 1.736966         | 34.518         | 41.375          |
| 2.736966         | 54.704         | 96.079          |
| 3.736966         | 2.3            | 98.379          |
| 5.64385619       | 1.621          | 100             |
| <b>Mean size</b> | <b>sorting</b> |                 |
| 3.826667         | 4.614773       |                 |

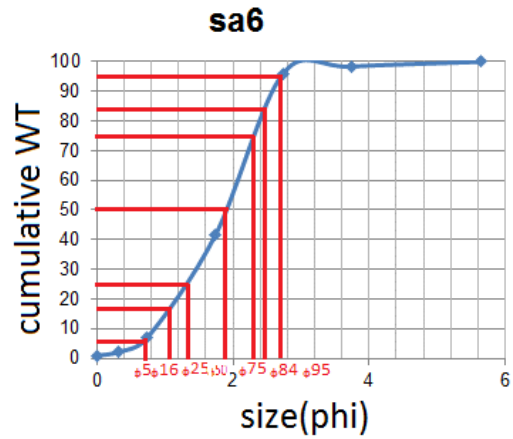

Table S23-6 Grain size analysis of core 11 sample 6

Fig.S26-6 cumulative weight with grain size in Phi unit of core 11 sample no.6

| size             | WT %           | cumulative WT % |
|------------------|----------------|-----------------|
| 0                | 13.269         | 13.269          |
| 0.321928         | 10.165         | 23.434          |
| 0.736965         | 14.999         | 38.433          |
| 1.736966         | 28.467         | 66.9            |
| 2.736966         | 14.591         | 81.491          |
| 3.736966         | 8.007          | 89.498          |
| 5.64385619       | 10.502         | 100             |
| <b>Mean size</b> | <b>sorting</b> |                 |
| 2.168            | 6.854667       |                 |

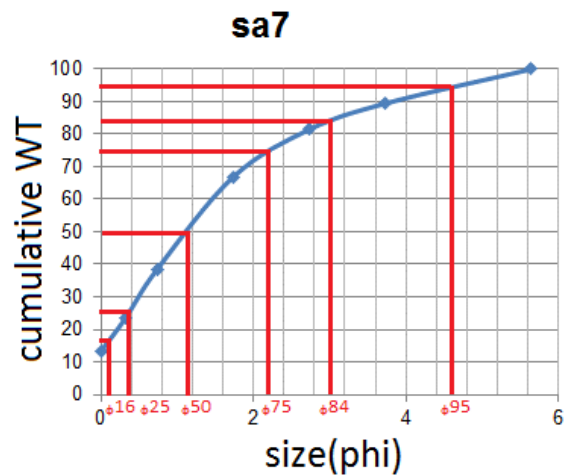

Table S23-7 Grain size analysis of core 11 sample 7

Fig.S26-7 cumulative weight with grain size in Phi unit of core 11 sample no.7



| size             | WT %           | cumulative WT % |
|------------------|----------------|-----------------|
| 0                | 7.155          | 7.155           |
| 0.321928         | 3.783          | 10.938          |
| 0.736965         | 6.379          | 17.317          |
| 1.736966         | 17.027         | 34.344          |
| 2.736966         | 19.941         | 54.285          |
| 3.736966         | 26.131         | 80.416          |
| 5.64385619       | 19.584         | 100             |
| <b>Mean size</b> | <b>sorting</b> |                 |
| 4.503333         | 8.117197       |                 |

Table S23-8 Grain size analysis of core 11 sample 8

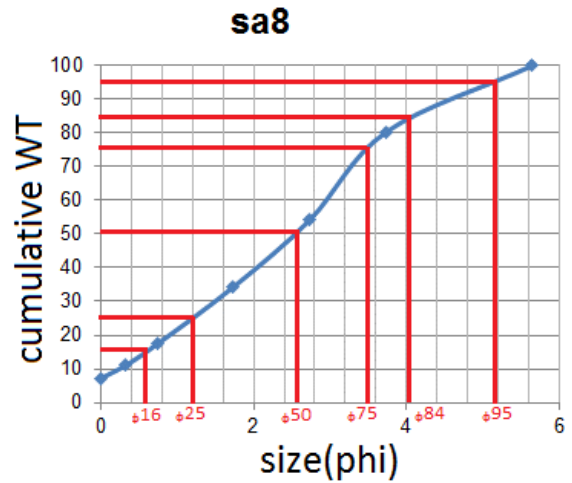

Fig.S26-8 cumulative weight with grain size in Phi unit of core 11 sample no.8

| size             | WT %           | Cumulative WT % |
|------------------|----------------|-----------------|
| 0                | 4.078          | 4.078           |
| 0.321928         | 2.223          | 6.301           |
| 0.736965         | 3.898          | 10.199          |
| 1.736966         | 13.951         | 24.15           |
| 2.736966         | 19.363         | 43.513          |
| 3.736966         | 30.763         | 74.276          |
| 5.64385619       | 25.724         | 100             |
| <b>Mean size</b> | <b>sorting</b> |                 |
| 5.521667         | 8.403295       |                 |

Table S23-9 Grain size analysis of core 11 sample 9

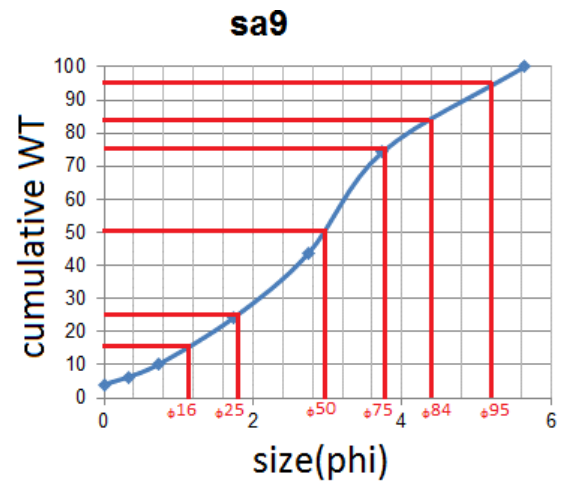

Fig.S26-9 cumulative weight with grain size in Phi unit of core 11 sample no.9

| size             | WT %           | cumulative WT % |
|------------------|----------------|-----------------|
| 0                | 7.479          | 7.479           |
| 0.321928         | 3.866          | 11.345          |
| 0.736965         | 6.738          | 18.083          |
| 1.736966         | 16.711         | 34.794          |
| 2.736966         | 19.754         | 54.548          |
| 3.736966         | 30.446         | 84.994          |
| 5.64385619       | 15.006         | 100             |
| <b>Mean size</b> | <b>sorting</b> |                 |
| 4.395333         | 7.523212       |                 |

Table S23-10 Grain size analysis of core 11 sample 10

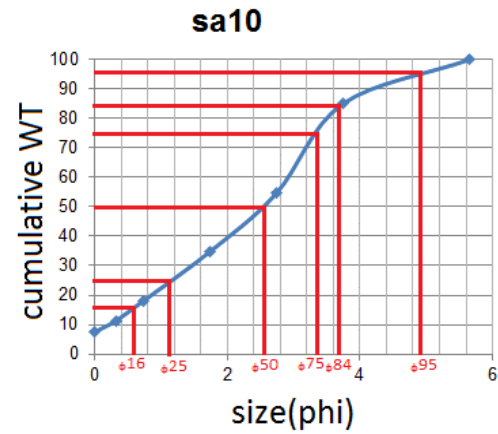

Fig.S26-10 cumulative weight with grain size in Phi unit of core 11 sample no.10

| size             | WT %           | cumulative WT % |
|------------------|----------------|-----------------|
| 0                | 13.374         | 13.374          |
| 0.321928         | 4.919          | 18.293          |
| 0.736965         | 6.201          | 24.494          |
| 1.736966         | 14.968         | 39.462          |
| 2.736966         | 18.022         | 57.484          |
| 3.736966         | 25.313         | 82.797          |
| 5.64385619       | 17.203         | 100             |
| <b>Mean size</b> | <b>sorting</b> |                 |
| 3.802            | 7.975182       |                 |

Table S23-11 Grain size analysis of core 11 sample 11

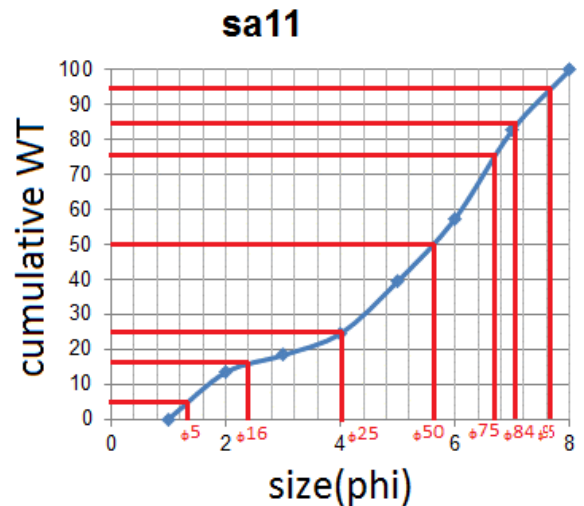

Fig.S26-11 cumulative weight with grain size in Phi unit of core 11 sample no.11

| size             | WT %           | cumulative WT % |
|------------------|----------------|-----------------|
| 0                | 10.711         | 10.711          |
| 0.321928         | 3.694          | 14.405          |
| 0.736965         | 5.85           | 20.255          |
| 1.736966         | 14.821         | 35.076          |
| 2.736966         | 18.712         | 53.788          |
| 3.736966         | 29.811         | 83.599          |
| 5.64385619       | 16.401         | 100             |
| <b>Mean size</b> | <b>sorting</b> |                 |
| 4.276667         | 7.708561       |                 |

Table S23-12 Grain size analysis of core 11 sample 12

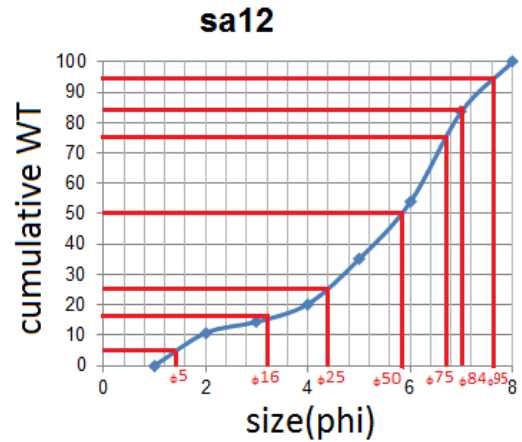

Fig.S26-12 cumulative weight with grain size in Phi unit of core 11 sample no.12

| size             | WT %           | cumulative WT% |
|------------------|----------------|----------------|
| 0                | 9.854          | 9.854          |
| 0.321928         | 5.75           | 15.604         |
| 0.736965         | 8.798          | 24.402         |
| 1.736966         | 20.983         | 45.385         |
| 2.736966         | 27.509         | 72.894         |
| 3.736966         | 14.455         | 87.349         |
| 5.64385619       | 12.651         | 100            |
| <b>Mean size</b> | <b>sorting</b> |                |
| 3.075333         | 7.631083       |                |

Table S24-1 Grain size analysis of core 12 sample 1

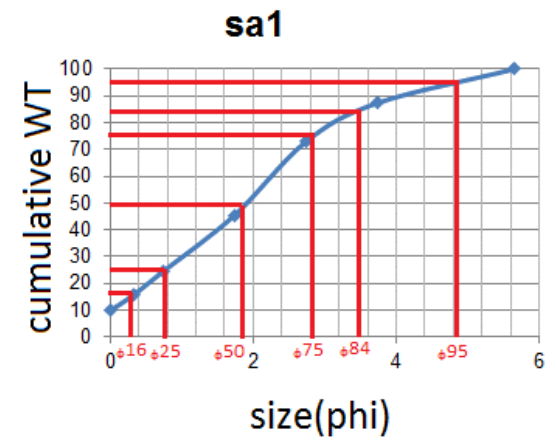

Fig.S27-1 cumulative weight with grain size in Phi unit of core 12 sample no.1

| size             | WT %           | cumulative WT % |
|------------------|----------------|-----------------|
| 0                | 4.632          | 4.632           |
| 0.321928         | 4.193          | 8.825           |
| 0.736965         | 9.161          | 17.986          |
| 1.736966         | 43.668         | 61.654          |
| 2.736966         | 28.44          | 90.094          |
| 3.736966         | 7.465          | 97.559          |
| 5.64385619       | 2.441          | 100             |
| <b>Mean size</b> | <b>sorting</b> |                 |
| 2.826667         | 5.420303       |                 |

Table S24-2 Grain size analysis of core 12 sample 2

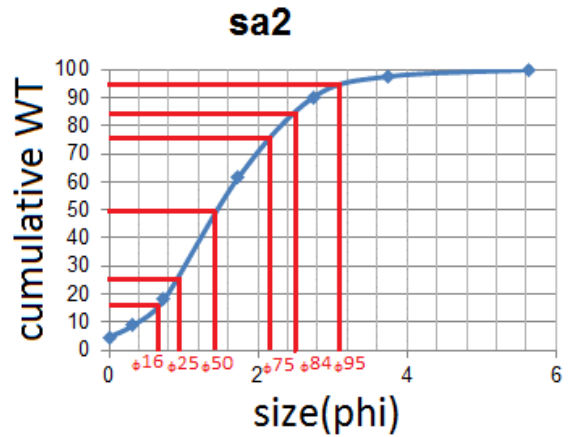

Fig.S27-2 cumulative weight with grain size in Phi unit of core 12 sample no.2

| size             | WT %           | cumulative WT % |
|------------------|----------------|-----------------|
| 0                | 8.819          | 8.819           |
| 0.321928         | 3.271          | 12.09           |
| 0.736965         | 5.559          | 17.649          |
| 1.736966         | 25.105         | 42.754          |
| 2.736966         | 50.012         | 92.766          |
| 3.736966         | 4.888          | 97.654          |
| 5.64385619       | 2.346          | 100             |
| <b>Mean size</b> | <b>sorting</b> |                 |
| 3.339667         | 5.02425        |                 |

Table S24-3 Grain size analysis of core 12 sample 3

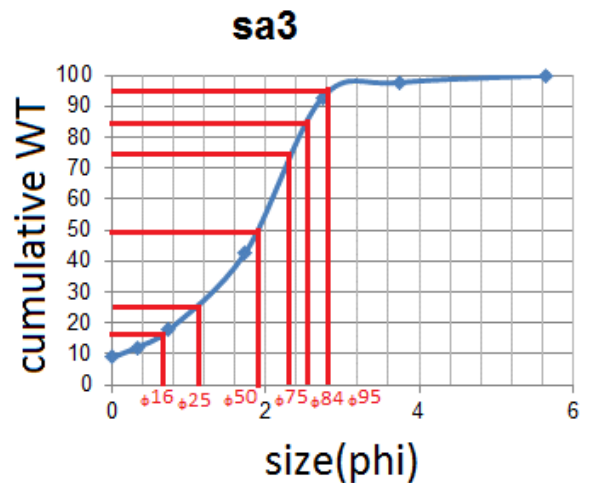

Fig.S27-3 cumulative weight with grain size in Phi unit of core 12 sample no.3

| size             | WT %           | cumulative WT % |
|------------------|----------------|-----------------|
| 0                | 2.539          | 2.539           |
| 0.321928         | 3.144          | 5.683           |
| 0.736965         | 5.949          | 11.632          |
| 1.736966         | 15.052         | 26.684          |
| 2.736966         | 10.793         | 37.477          |
| 3.736966         | 22.711         | 60.188          |
| 5.64385619       | 39.812         | 100             |
| <b>Mean size</b> | <b>sorting</b> |                 |
| 5.936667         | 9.46303        |                 |

Table S24-4 Grain size analysis of core 12 sample 4

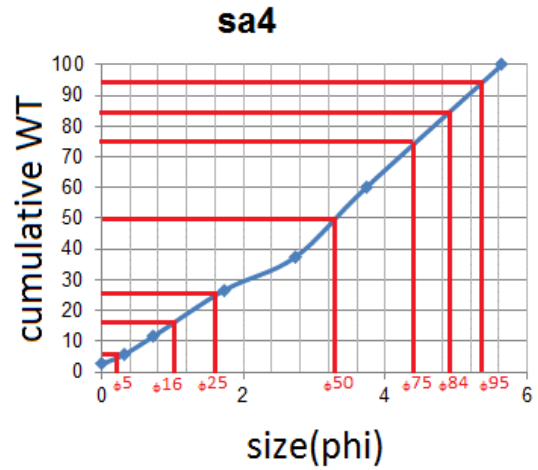

Fig.S27-4 cumulative weight with grain size in Phi unit of core 12 sample no.4

| size             | WT %           | cumulative WT % |
|------------------|----------------|-----------------|
| 0                | 4.68           | 4.68            |
| 0.321928         | 6.167          | 10.847          |
| 0.736965         | 11.747         | 22.594          |
| 1.736966         | 32.955         | 55.549          |
| 2.736966         | 35.854         | 91.403          |
| 3.736966         | 5.662          | 97.065          |
| 5.64385619       | 2.935          | 100             |
| <b>Mean size</b> | <b>sorting</b> |                 |
| 3.553333         | 4.313409       |                 |

Table S24-5 Grain size analysis of core 12 sample 5

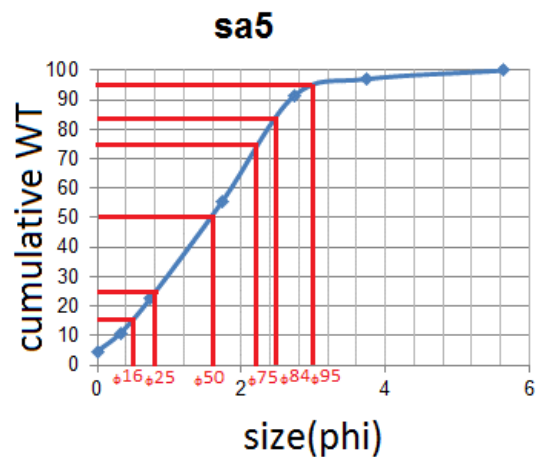

Fig.S27-5 cumulative weight with grain size in Phi unit of core 12 sample no.5

| size             | WT %           | cumulative WT % |
|------------------|----------------|-----------------|
| 0                | 11.792         | 11.792          |
| 0.321928         | 4.069          | 15.861          |
| 0.736965         | 5.672          | 21.533          |
| 1.736966         | 14.261         | 35.794          |
| 2.736966         | 31.853         | 67.647          |
| 3.736966         | 18.887         | 86.534          |
| 5.64385619       | 13.466         | 100             |
| <b>Mean size</b> | <b>sorting</b> |                 |
| 3.71             | 7.66803        |                 |

Table S24-6 Grain size analysis of core 12 sample 6

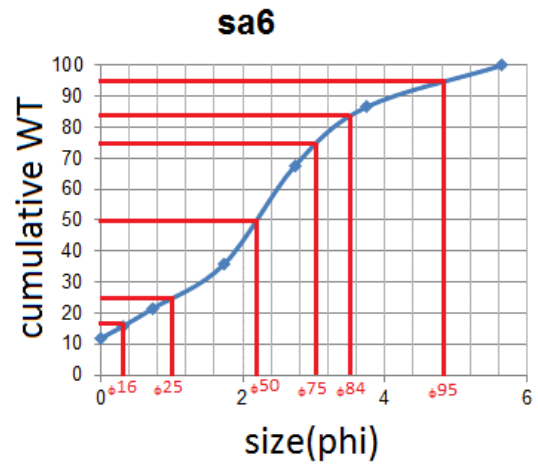

Fig.S27-6 cumulative weight with grain size in Phi unit of core 12 sample no.6

| size             | WT %           | cumulative WT % |
|------------------|----------------|-----------------|
| 0                | 15.062         | 15.062          |
| 0.321928         | 5.53           | 20.592          |
| 0.736965         | 7.774          | 28.366          |
| 1.736966         | 21.463         | 49.829          |
| 2.736966         | 18.533         | 68.362          |
| 3.736966         | 20.752         | 89.114          |
| 5.64385619       | 10.886         | 100             |
| <b>Mean size</b> | <b>sorting</b> |                 |
| 2.964333         | 7.324447       |                 |

Table S24-7 Grain size analysis of core 12 sample 7

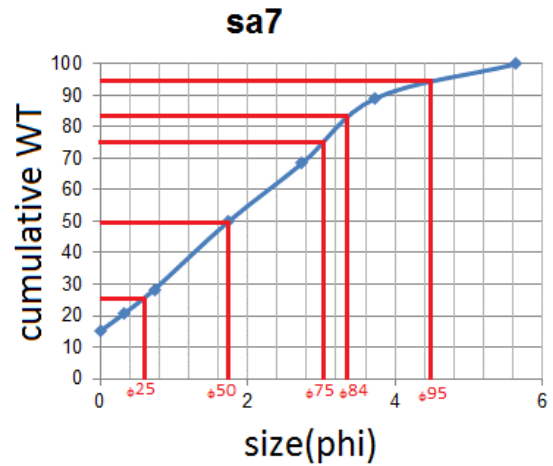

Fig.S27-7 cumulative weight with grain size in Phi unit of core 12 sample no.7

| size             | WT %           | cumulative WT % |
|------------------|----------------|-----------------|
| 0                | 2.008          | 2.008           |
| 0.321928         | 2.098          | 4.106           |
| 0.736965         | 4.8            | 8.906           |
| 1.736966         | 15.069         | 23.975          |
| 2.736966         | 22.651         | 46.626          |
| 3.736966         | 37.649         | 84.275          |
| 5.64385619       | 15.725         | 100             |
| <b>Mean size</b> | <b>sorting</b> |                 |
| 5.293333         | 7.278864       |                 |

Table S24-8 Grain size analysis of core 12 sample 8

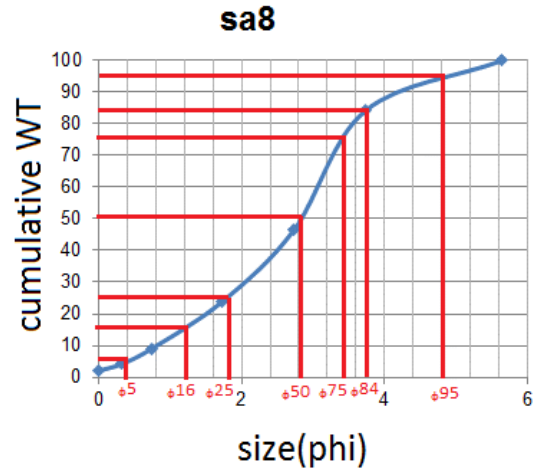

Fig.S27-8 cumulative weight with grain size in Phi unit of core 12 sample no.8

| size             | WT %           | cumulative WT % |
|------------------|----------------|-----------------|
| 0                | 0.623          | 0.623           |
| 0.321928         | 0.674          | 1.297           |
| 0.736965         | 2.252          | 3.549           |
| 1.736966         | 13.422         | 16.971          |
| 2.736966         | 20.545         | 37.516          |
| 3.736966         | 46.18          | 83.696          |
| 5.64385619       | 16.304         | 100             |
| <b>Mean size</b> | <b>sorting</b> |                 |
| 5.926667         | 7.091667       |                 |

Table S24-9 Grain size analysis of core 12 sample 9

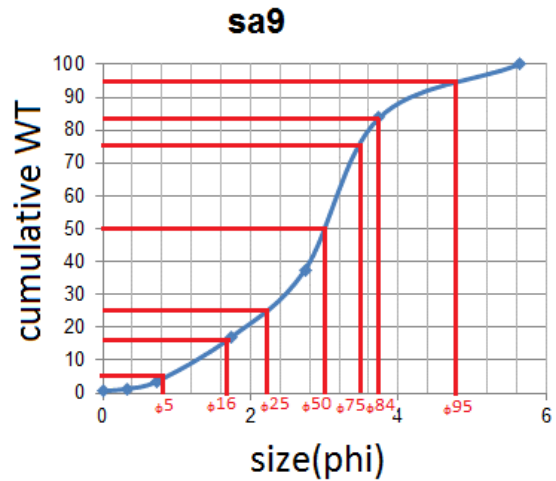

Fig.S27-9 cumulative weight with grain size in Phi unit of core 12 sample no.9

| size             | WT %           | cumulative WT % |
|------------------|----------------|-----------------|
| 0                | 1.645          | 1.645           |
| 0.321928         | 1.656          | 3.301           |
| 0.736965         | 2.486          | 5.787           |
| 1.736966         | 5.867          | 11.654          |
| 2.736966         | 9.46           | 21.114          |
| 3.736966         | 65.026         | 86.14           |
| 5.64385619       | 13.86          | 100             |
| <b>Mean size</b> | <b>sorting</b> |                 |
| 7.02             | 6.731061       |                 |

Table S24-10 Grain size analysis of core 12 sample 10

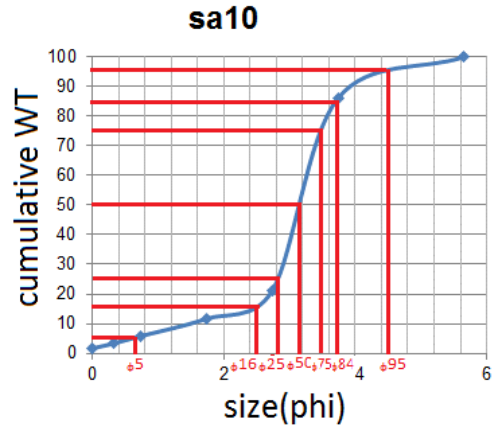

Fig.S27-10 cumulative weight with grain size in Phi unit of core 12 sample no.10

| size             | WT %           | cumulative WT % |
|------------------|----------------|-----------------|
| 0                | 18.281         | 18.281          |
| 0.321928         | 6.467          | 24.748          |
| 0.736965         | 9.038          | 33.786          |
| 1.736966         | 20.24          | 54.026          |
| 2.736966         | 19.068         | 73.094          |
| 3.736966         | 14.157         | 87.251          |
| 5.64385619       | 12.749         | 100             |
| <b>Mean size</b> | <b>sorting</b> |                 |
| 2.56             | 7.622273       |                 |

Table S24-11 Grain size analysis of core 12 sample 11

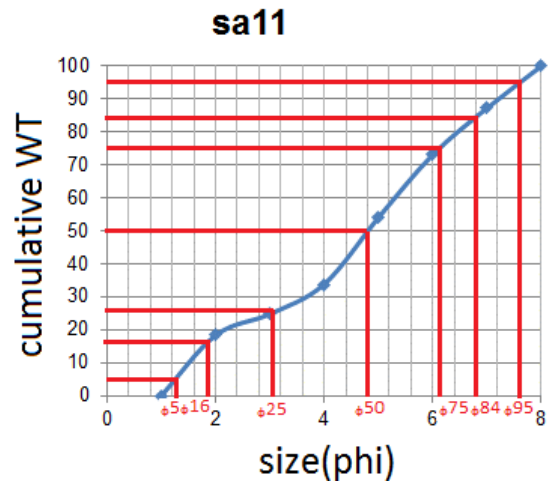

Fig.S27-11 cumulative weight with grain size in Phi unit of core 12 sample no.11



| size             | WT %           | cumulative WT % |
|------------------|----------------|-----------------|
| 0                | 12.174         | 12.174          |
| 0.321928         | 6.325          | 18.499          |
| 0.736965         | 9.701          | 28.2            |
| 1.736966         | 27.948         | 56.148          |
| 2.736966         | 35.438         | 91.586          |
| 3.736966         | 4.988          | 96.574          |
| 5.64385619       | 3.426          | 100             |
| <b>Mean size</b> | <b>sorting</b> |                 |
| 2.57             | 5.132727       |                 |

Table S24-12 Grain size analysis of core 12 sample 12

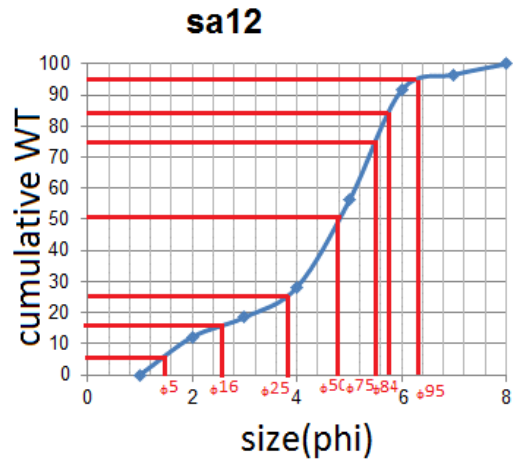

Fig.S27-12 cumulative weight with grain size in Phi unit of core 12 sample no.12

| size             | WT %           | cumulative WT % |
|------------------|----------------|-----------------|
| 0                | 12.735         | 12.735          |
| 0.321928         | 4.881          | 17.616          |
| 0.736965         | 6.162          | 23.778          |
| 1.736966         | 14.451         | 38.229          |
| 2.736966         | 22.015         | 60.244          |
| 3.736966         | 29.012         | 89.256          |
| 5.64385619       | 10.744         | 100             |
| <b>Mean size</b> | <b>sorting</b> |                 |
| 3.713333         | 7.26053        |                 |

Table S24-13 Grain size analysis of core 12 sample 13

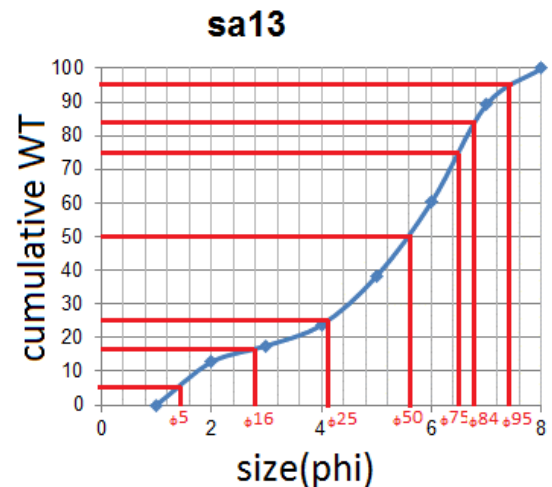

Fig.S27-13 cumulative weight with grain size in Phi unit of core 12 sample no.13

| size             | WT %           | cumulative WT % |
|------------------|----------------|-----------------|
| 0                | 2.5            | 2.5             |
| 0.321928         | 2.196          | 4.696           |
| 0.736965         | 4.124          | 8.82            |
| 1.736966         | 16.57          | 25.39           |
| 2.736966         | 35.652         | 61.042          |
| 3.736966         | 25.582         | 86.624          |
| 5.64385619       | 13.376         | 100             |
| <b>Mean size</b> | <b>sorting</b> |                 |
| 4.916667         | 7.232955       |                 |

Table S24-14 Grain size analysis of core 12 sample 14

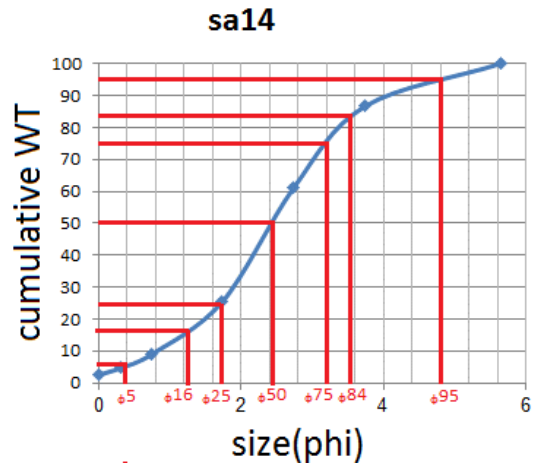

Fig.S27-14 cumulative weight with grain size in Phi unit of core 12 sample no.14

| size             | WT %           | cumulative WT % |
|------------------|----------------|-----------------|
| 0                | 6.321          | 6.321           |
| 0.321928         | 3.465          | 9.786           |
| 0.736965         | 5.701          | 15.487          |
| 1.736966         | 15.566         | 31.053          |
| 2.736966         | 35.536         | 66.589          |
| 3.736966         | 29.898         | 96.487          |
| 5.64385619       | 3.513          | 100             |
| <b>Mean size</b> | <b>sorting</b> |                 |
| 4.136667         | 6.443788       |                 |

Table S24-15 Grain size analysis of core 12 sample 15

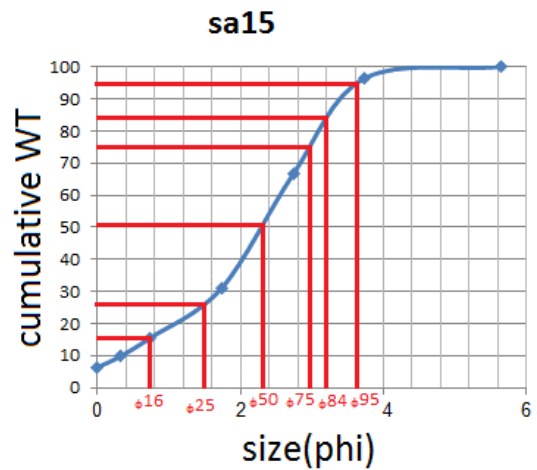

Fig.S27-15 cumulative weight with grain size in Phi unit of core 12 sample no.15

| size             | WT %           | cumulative WT % |
|------------------|----------------|-----------------|
| 0                | 4.265          | 4.265           |
| 0.321928         | 2.435          | 6.7             |
| 0.736965         | 5.084          | 11.784          |
| 1.736966         | 15.797         | 27.581          |
| 2.736966         | 37.109         | 64.69           |
| 3.736966         | 32.643         | 97.333          |
| 5.64385619       | 2.667          | 100             |
| <b>Mean size</b> | <b>sorting</b> |                 |
| 4.543333         | 6.332348       |                 |

Table S24-16 Grain size analysis of core 12 sample 16

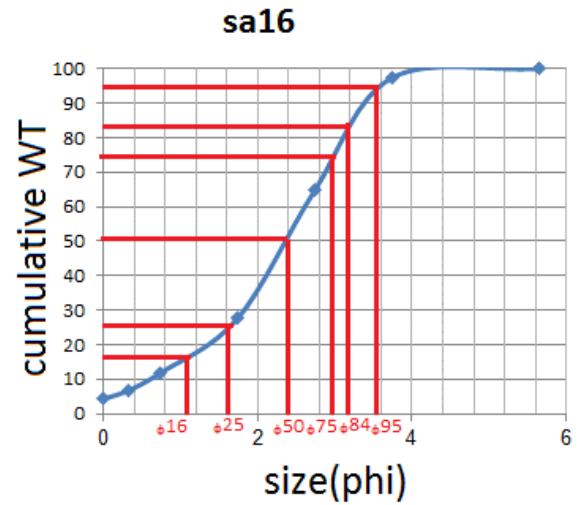

Fig.S27-16 cumulative weight with grain size in Phi unit of core 12 sample no.16
