# Supplementary material for: Paleotsunami deposits along the coast of Egypt correlate with historical earthquake records of eastern Mediterranean
Source: Copernicus journal article supplement (doi:10.5194/nhess-2018-62), 2018-03-12
Supplement: Supplementary file [file nhess-2018-62-RC3-supplement.pdf]

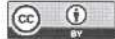

Paleotsunami deposits along the coast of Egypt correlate with  
historical earthquake records of eastern Mediterranean

Asem Salama, (1, 2, \*), Mustapha Meghraoui (1\*\*), Mohamed El Gabry (2, \*),  
Said Maouche (3, \*), Hesham Moussa Hussein (2, \*), and Ibrahim Korrat (4)

<sup>1</sup> EOST-IPGS - CNRS - UMR 7516, 5 rue René Descartes, Strasbourg, France

<sup>2</sup> NRIAG, 11421 Helwan, Egypt

<sup>3</sup> CRAAG, Bouzareah, Algeria

<sup>4</sup> Dept. of Seismology, Mansoura University, Mansoura, Egypt

\* Also at North Africa Group for Earthquake and Tsunami Studies (NAGET), Ne 140/OEA  
ICTP, Italy

\*\*Corresponding author

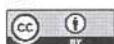

37

38 **Abstract.**

39 We study the sedimentary record of past tsunamis along the coastal area west of Alexandria  
40 (NW Egypt) taking into account the occurrence of major historical earthquakes in the eastern  
41 Mediterranean. The two selected sites at Kefr Saber (~32-km west of Marsa-Matrouh city)  
42 and ~10 km northwest of El Alamein village are coastal lagoons protected by 2 to 20-m-high  
43 dunes parallel to the shoreline. Field data were collected by: 1) Coastal geomorphology along  
44 estuaries, wedge-protected and dune-protected lagoons, and 2) identification of paleotsunamis  
45 deposits and their spatial distribution using five trenches (1.5-m-depth) at Kefr Saber and  
46 twelve cores (1 to 2.5-m-depth) at El Alamein. Detailed logging of sedimentary sections were  
47 analysed using X rays, grain size and sorting, total organic and inorganic matter, bulk  
48 mineralogy, magnetic susceptibility and radiocarbon dating necessary for the identification of  
49 past tsunamis records. Generally of low energy, the stratigraphic succession made of marine  
50 and alluvial deposits includes intercalated high-energy deposits made of mixed fine and  
51 coarse sand with broken shells, interpreted as catastrophic layers correlated with tsunami  
52 deposits. Although the radiocarbon dating of 46 samples consist in mixed old (> 13000 year  
53 BP) and young (< 5500 year BP), dated charcoal and shells in sedimentary units allow the  
54 correlation with the 24 June 1870 (Mw 7.5), 8 August 1303 (Mw ~8) and 21 July 365 (Mw 8  
55 – 8.5) large tsunamigenic earthquakes that caused inundations in Alexandria and northern  
56 Egyptian shoreline. Our results point out the size and recurrence of past tsunamis and the  
57 potential for tsunami hazard over the Egyptian coastline and the eastern Mediterranean  
58 regions.

coastal  
lagoon

59

60

61

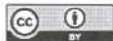

62 **1. Introduction:**

63 Egypt has a well-documented historical catalogue of earthquakes and tsunamis  
64 recorded in ancient texts and manuscripts. Original documents and archives from past  
65 civilizations are considered as the principal sources of macroseismic data for major historical  
66 earthquakes and tsunamis (Poirier and Taher, 1980; Maamoun et al., 1984; Ambraseys et al.,  
67 1994, 2009; Guidoboni et al., 1994, 2005; Soloviev et al. 2000, Tinti et al., 2001). The  
68 catalogue of Ambraseys et al., 2009 reports that coastal cities of northern Egypt have  
69 experienced repeated tsunamis inundations with severe damage in the past. While historical  
70 earthquakes and tsunamis are well documented, it appears that there is a lack of holistic  
71 investigations for tsunami deposits along the Mediterranean coastlines. The geomorphology  
72 along the Mediterranean coastline of northern Egypt with low-level topography (Hassouba,  
73 1995), dunes and lagoons constitutes an ideal natural environment for the geological record of  
74 past tsunamis.

75 The Eastern Mediterranean region experienced major earthquakes (with  $M_w > 7.5$ )  
76 mainly along the Hellenic subduction zone due to the convergence between the Eurasian and  
77 African plates (Fig. 1; Ambraseys et al., 1994, Taymaz et al., 2004). Major historical tsunamis  
78 in the eastern Mediterranean region that affected northern Egypt are triggered by large  
79 earthquakes (Papadopoulos et al., 2014) but the possibility of landslide tsunami associated  
80 with local earthquakes (El-Sayed et al., 2004) may also exist. Yalciner et al. (2014) estimated  
81 that up to  $500 \text{ km}^3$  landslide volume, with wave height ranging from 0.4 to 4 m, might have  
82 taken place offshore the Nile Delta. However, the effects of landslide tsunami are limited to  
83 the nearby coastline as shown by the recent examples of landslide tsunamis in the  
84 Mediterranean (Tinti et al., 2005).

85 Tsunami research of the past 20 years has led to the discovery of coastal tsunami  
86 sedimentary records dating back to thousands of years. Among the early studies, the evidence

when?

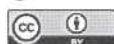

87 of more than 6 soil levels buried below tsunami deposits in the past 7000 years were found at  
 88 Puget Sound coastline of Washington state (Atwater, 1987). Nanayama et al. (2003)  
 89 recognized major tsunamis due to extensive coastal inundation along the eastern coast of  
 90 Hokkaido (northern Japan); the repeated sand sheet layers several kilometres inland evidenced  
 91 a 500-year tsunami cycle in the period between 2000 and 7000 years BP. Following the 2004  
 92 Sumatra earthquake (Mw 9.1) and tsunami, Malik et al. (2015) identified in trenches three  
 93 historical tsunamis during the past 1000 years along the coast of South Andaman Island  
 94 (India). In the Mediterranean, De Martini et al. (2012) identified two tsunamis deposits  
 95 during the first millennium BC and another one in 650-770 AD and estimated 385 year  
 96 average recurrence interval for strong tsunamis along the eastern coast of Sicily (Italy).

97 In this paper, we investigate the paleotsunami deposits in the northern coast of Egypt  
 98 and their correlation with the historical tsunami catalogue of the Eastern Mediterranean.  
 99 Using coastal geomorphology with trenching and coring, we examine the geological evidence  
 100 of tsunami deposits using geochemical analysis, magnetic susceptibility and radiocarbon  
 101 dating to identify the tsunamis records. The Bayesian simulation (Oxcal 4.2; Bronk-Ramsey,  
 102 2013) is applied to the radiocarbon results and stratigraphic succession of coastal deposits in  
 103 order to generate a precise paleochronology of tsunami events. Finally, we discuss the  
 104 evidence of paleotsunamis and their dating in comparison with the major historical  
 105 tsunamigenic earthquakes of the Hellenic and Cyprus subduction zones.

106

## 107 **2. Major historical tsunamis of the Mediterranean coast of Egypt**

108 The tsunami catalogue of Egypt cites the work of Guidoboni et al. (1994, 2005) and  
 109 Ambraseys (2009) that report several large historical tsunamigenic earthquakes with severe  
 110 damage in the eastern Mediterranean regions (Table 1). Among these events, the tsunamis of

*is this relevant  
 for the Mediterranean  
 tsunamis?*



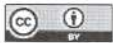

111 21 July 365, 8 August 1303 and 24 June 1870 inundated the harbour of Alexandria city as  
112 well as the Mediterranean coast of Egypt.

113 Early in the morning of 21 July 365, an earthquake with estimated magnitude  $\sim$ Mw 8-  
114 8.5 located offshore West of Crete generated a major tsunami that affected the eastern  
115 Mediterranean coastal regions (Ambraseys et al., 1994). A contemporaneous account from the  
116 Roman historian Ammianus Marcellinus (born 325 – 330, died c. 391 – 400; Guidoboni et al.,  
117 1994) reported the sudden retreat of the sea and the occurrence of a “gigantic” wave inland  
118 with inundation and damage to the Alexandria harbour and city where ships were lifted inland  
119 on house roofs; the estimated wave height of this tsunami was calculated by Hamouda (2009)  
120 to be larger than 8 m in Alexandria. The seismic source of this earthquake is located in west  
121 Crete, according to archeological and historical damage distribution, combined with coastal  
122 uplift measurements and modelling (Fig. 1; Guidoboni et al., 1994; Stiros, 2001; Shaw et al.,  
123 2008 and Ambraseys, 2009).

124 On 8 August 1303 a major earthquake with magnitude  $\sim$ Mw 8 located in between  
125 Crete and Rhodes islands generated a tsunami that greatly damaged the coastal cities of the  
126 eastern Mediterranean (Guidoboni and Comastri, 2005; Ambraseys, 2009). Abu-El Fida  
127 (1907) reported in 1329 that the Alexandria city and Nile delta were flooded and many houses  
128 were damaged in Cairo and northern Egypt. In Alexandria, part of the city walls collapsed, the  
129 famous lighthouse was destroyed and some ships were torn apart ~~carried~~ up inland due to the  
130 tsunami waves (Abu-El Fida, 1907). In a recent synthesis of major seismic sources,  
131 Papadopoulos et al. (2014) locate the 1303 earthquake in between Crete and Rhodes Islands  
132 of the Hellenic subduction zone (Fig. 1).

*and (or?)*

*I couldn't locate it on the massive line!*

133 On 24 June 1870, a large earthquake affected many places of the eastern  
134 Mediterranean region and was felt in Alexandria at around 18 h with no damage in the city  
135 but with slight damage in Cairo (Ambraseys, 2009). In Alexandria coastline and Nile Delta,

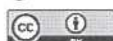

136 the sea wave flooded the quays of ports and inland fields (Coumbary, 1870). The seismic  
 137 source location of this earthquake at the eastern edge of Crete is inferred from the damage in  
 138 Heraklion and felt shaking around the east Mediterranean (Fig. 1; Schmidt, J.F., 1879;  
 139 Jusseret and Sintubin, 2017).

? what do you mean?

140 Among these three reported earthquakes, it appears that the AD 365 and AD 1303 that  
 141 can be classified as very large earthquakes (with  $M_w \geq 8$ ; Stiros, 2001; Shaw et al., 2008;  
 142 Hamouda, 2006, 2009) generated major tsunamis with basin-wide impacts, while the 1870  
 143 earthquake may be of a lower magnitude ( $M_w \sim 7 - 7.5$ ; Ben Menahem et al., 1991; Soloviev,  
 144 2000). Several studies of the 21 July 365 and 8 August 1303 historical earthquakes refer to  
 145 tsunami waves with inundation in Alexandria and coastlines of northern Egypt, and therefore  
 146 with the potential of tsunami records in the sedimentary deposits. However, there have been  
 147 some debates on the 1870 event concerning its location, size and the possibility of tsunami  
 148 waves, but several authors (Soloviev et al., 2000; Ben Menahem et al., 1979; Salamon et al.,  
 149 2007; Papadopoulos et al., 2010; and Maramai et al., 2014) support the tsunami generation by  
 150 1870 earthquake.

151

### 152 3. Coastal geomorphology and site selection of paleotsunami records

153 The northwest Mediterranean coast of Egypt forms the northern extremity of the  
 154 Marmarica plateau which is a Miocene homoclinal limestone that extends west of Alexandria  
 155 for about 500 km, acting as a major catchment area feeding the drainage system (Fig. 1). The  
 156 plateau runs from the Qattara Depression southward to the piedmont plain northward with  
 157 various elevations reaching ~100 m at Marsa Matrouh escarpment. The geomorphological  
 158 landform of the study area is characterized by a 60-m-high northern plateau that includes  
 159 ridges, sand dunes, lagoons, and rocky plains within a 20-km-wide strip along the coastline

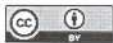

→ hardly visible;  
 consider modifying  
 this phrase.

160 (Fig. 1). The rocky Pleistocene limestone ridges include a veneer of carbonate sand that are  
 161 mostly composed of oolitic grains (Frihy et al., 2010).

162 Coastal dune-ridges protect inner lagoons from the sea and constitute outstanding  
 163 landform features at several locations parallel to the shoreline (Figs 2 and 3). These dunes are  
 164 weathered where the rocky headlands outcrop (Abbas et al., 2008). The 2 to 20-m-high  
 165 coastal beach-dune ridge, mainly composed of oolitic and biogenic calcareous sand, separates  
 166 coastal lagoons and *sabkhas* (salt lake) from the sea. The beach-dune ridge is developed along  
 167 the receding Quaternary shorelines and embayment of the Mediterranean Sea (Hassouba,  
 168 1995). The lagoons with flat depressions separated from the sea by the coastal dunes (with  
 169 different heights and sometimes with seawater outlets) are designated sites for the record of  
 170 past tsunami deposits.

not in 3!  
 ? meaning.

likely?

171 The accumulation of large boulders (Shah-Hosseini et al., 2016) near the selected sites  
 172 is considered as a possible witness of past tsunami events. However, the boulders along the  
 173 coastlines may either results from storms (Hall et al. 2006; Spiske et al. 2008) or tsunami  
 174 waves (Goff et al. 2006; 2009; Morhange et al. 2006). The majority of boulders observed near  
 175 our investigated sites shows imbricated positions of large blocks directed toward south, a  
 176 situation comparable to the tsunamigenic boulders studied along the Algerian coastline  
 177 (Maouche et al. 2009).

178 The discrimination between storm and tsunami deposits is a challenge in the  
 179 Mediterranean regions (Maouche et al., 2009; Marriner et al., 2017). However, the tsunami  
 180 stratigraphic record is less frequent (according to Tinti et al., 2001) and often presents a  
 181 specific sedimentary signature with mixed deposits that include: 1) The basal contact of  
 182 tsunami layer is extremely sharp with loading structures where layers contain organic rich  
 183 mud and vegetation (Matsumoto et al., 2008; Switzer and Jones 2008); 2) the presence of rip  
 184 up clasts that also suggest considerable erosion of lagoon deposits usually associated with



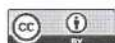

185 tsunami deposits (Szezucinski et al 2006); 3) The tsunami deposits tend to be much more  
 186 poorly sorted than storm deposits (Paris et al., 2007); 4) the large number of mixed and often  
 187 broken bivalve and shells that occupy large vertical and lateral stratigraphic positions (Donato  
 188 et al., 2008); 5) the tsunami deposits tend to have laminations and or cross bedding due to  
 189 landward or seaward current (Tuttle et al., 2004); 6) the particle sizes of tsunami sediments  
 190 fine landward from the shores (Srinivasalu et al., 2009); 7) the grain size are often bimodal  
 191 particles size than the storm which tend to have unimodal particle size (Paris et al., 2007); 8)  
 192 The increase of concentrations of Na, S, Cl, Mg with the presence of heavy minerals in  
 193 tsunami deposits (Szezucinski et al., 2006; Babu et al., 2007); and 9) The low peak value of  
 194 magnetic susceptibility linked to the amount of sand originated from the littoral dunes and  
 195 reworked mixed sediments from tsunami waves (Font et al., 2010).

196 The local geomorphological and topographic settings contribute to the site selection  
 197 for paleotsunami investigations. Our site selection for trenching and coring took into account  
 198 the accessibility to dry lagoons (during summer season) in areas with no urbanization or  
 199 artificially reworked soil. Suitable sites for trenching and coring are located in areas protected  
 200 from the sea by the rather low (~2-m-high) sand dune topography that allows tsunami waves  
 201 and related material to deposit into the lagoon. Two ~200 km apart sites of seasonal dry  
 202 lagoons have met the selection criteria for paleotsunami investigation (Figs. 1 and 2): 1) Kefr  
 203 Saber located at ~32-km west of Marsa-Matrouh city, and 2) El Alamein site at ~10 km  
 204 northwest of El Alamein city and ~150 km west of Alexandria. Five trenches were dug at  
 205 Kefr Saber (Fig 2a), and 12 cores were performed at the El Alamein site (Fig 2b).

206

#### 207 4. Used methods for paleotsunami investigations

208 The trench size is ~2 x 1 meter with ~1.5-m-depth depending on the water table reach;  
 209 all trench walls exposed fine-grained sedimentary layers and were logged in details. The

*bivalve also  
have shells!*

*clarity!*

*as compared  
with*

*reach  
they look  
opposite in  
figs. Cities  
are not well  
visible!*



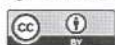

210 maximum core depth is ~2.6 m and their distribution in the lagoons was planned to occupy an  
 211 area from the depression (depo-centre) to the edge close to the outlet of seawater in order to  
 212 observe any thickness variation of tsunami layers.

? not well indicated in figure 2

213 The core tubes were split in half lengthwise, photographed using both normal and  
 214 ultra-violet lightning accompanied by detail description of textures and sedimentary  
 215 structures. An X-ray scanning was performed immediately after core opening and all cores  
 216 were sent to the laboratory of the National Institute of Geophysics and Astronomy (NRIAG,  
 217 Cairo) for sampling and further analysis. The magnetic susceptibility measurements were  
 218 operated along cores and samples were collected for radiocarbon dating, physical, chemical  
 219 and organic matter analyses.

220 The magnetic susceptibility was measured for cores at the NRIAG Rock Magnetism  
 221 laboratory then corrected against air by using Bartington compatible software. 120 samples  
 222 were collected from cores then analysed for grain size analysis; X-ray diffraction using  
 223 Philips PW 1730 <sup>instrument.</sup> The total organic and inorganic measurements were carried out at the  
 224 laboratory of Central Metallurgical Research & Development Institute (CMRDI at Eltebbin,  
 225 Egypt). Statistics of the grain-size distribution were calculated using Folk equations (1968) to  
 226 obtain mean size and sorting of the sediments along the cores. <sup>Spacing?</sup>

227 The Radiocarbon dating of samples are carried out in three laboratories (Poznan  
 228 laboratory - Poland, CIRAM in Bordeaux, France and Beta Analytical laboratory, USA) to  
 229 ensure coherency and quality of results (see Tables 2 a and b). The collected samples are  
 230 made of charcoal, bones, gastropods, shells and organic matter. The radiocarbon dating results  
 231 of samples are subsequently corrected using a recent calibration curve (Reimer et al., 2013)  
 232 and the Oxcal software (Bronk-Ramsay, 2009) for the probability density function with  $2\sigma$   
 233 uncertainty for each dated sample. In addition, from a succession of calibrated dates, a  
 234 Bayesian analysis provides the simulated age in probability density function of a catastrophic

If samples are sent to 3 labs, it is most likely that results will be difficult to compare. Explain this!

Did you try sending a few samples to the three labs just to check the accuracy of measurements?

See back of sheet.

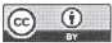

*I think that this methodological approach deserves some more explanation. Or, do you simply push some keys and get a date?*

235 event. The simulated age allows the correlation between the tsunami layer deposits, the  
 236 related isotopic chronology and the historical tsunami events in catalogues.

237

## 238 5. Description of trenches and cores sedimentary layers *exposed / penetrated in*

239 The selected sites revealed a succession of sedimentary units typical of lagoon  
 240 deposits with fine strata made of a mix of fine gravel, sand, silt and clay (Salama, 2017). At  
 241 both Kefr Saber and El Alamein sites, trenches and cores present comparable soft sediment  
 242 content and stratigraphy. The variation of sediments content in the different cores is due to the  
 243 distance from the shore and to the core location in the lagoons with regard to dunes heights. A  
 244 detailed description of the trenches and cores at both Kefr Saber and El Alamein sites is  
 245 presented here below:

*This is not a document that you can easily consult*

246 **5.1. Kefr Saber site:** Trenches P1, P2, P3 and P4 are 20 to 40 m distance, have quite  
 247 similar sedimentary succession with fine-grained mostly alluvial deposits made of sandy-silty  
 248 layers with mixed coarse and white fine sand that contains broken shells of marine origin  
 249 (Fig. 3 and trench logs in supplemental material S1). A conspicuous layer of white mixed  
 250 sand, gravel and broken shells with variable 2 to 15 cm thicknesses is found at 30 – 50 cm  
 251 depth in P1, P2, P3; its thickness decreases landward to 1 cm in P4 (see supplemental material  
 252 S1 a, b, c, d, e). Trench P5 which is close to the dunes and shoreline shows a succession of  
 253 coarse and fine sand, and 30 to 40 cm thick mixed with pebbles which, as observed in other  
 254 trenches, are fining inland. According to Goff et al., 2006, the high energy fining inland  
 255 sedimentary sequence is related to tsunami deposits rather than storm deposits. The white  
 256 mixed sand with broken shells characterized by high-energy sedimentary deposits is interpreted  
 257 as of tsunami origin.

*distance to what? Regular spacing between trenches? Distance to dune ridges?*

*Any idea of taxonomy?*

*below surface*

258 The mixed radiocarbon dating of samples in trenches is an issue at Kefr Saber. Two  
 259 charcoal samples collected in Trench P1 at 35 cm and 53 cm depth display <sup>gross</sup> modern age <sub>yields</sub>

*/n*

*The age is not displayed.*

*In the abstract, the authors argue that they interpret the coarse layers as tsunamiic after studying a variety of features and analytical results .... and here they just jump to this interpretation on the basis of a landward decrease of grain size. I do not completely catch the idea. Please, check!*



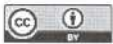

260 (younger than 1650 AD) and 39000-38250 BC, respectively. In Trench P2, two other charcoal  
 261 samples collected at 73 cm and 100 cm below surface depth and both below the tsunami layer labelled 1  
 262 (Fig. S1-b) indicate 50 - 70 AD and 5300-5070 BC, respectively (see also Table 2a). In  
 263 Trench P4, four collected charcoal samples at 15 cm, 25 cm, 40 cm and 61 cm depth reveal  
 264 modern ages (younger than 1650 AD). A fifth charcoal sample recovered located at 60 cm depth  
 265 provides 17200- 15900 BC. In Trench P5, four charcoal samples are collected with the  
 266 uppermost sample located at 12 cm depth is dated at 360-50 BC, the second sample at 17 cm  
 267 depth show 30- 180 AD, the third, and fourth charcoal samples found at 33 cm and 37 cm  
 268 depth are dated at 350 - 1050 BC and 2400-4000BC, respectively. The mixing <sup>of</sup> between old  
 269 (older than 7000 years BP) and relatively young ages (younger than 2000 years BP) <sup>denotes</sup> reworking of former deposits and redeposit on a lagoon  
 270 of the deposit of reworked layers within an environment of young sedimentation in lagoon.

271 **Results:** Although the sedimentary deposits in trenches at Kefr Saber indicate mixed  
 272 and reworked sedimentation, the well identified coarse and fine white sand layer with broken  
 273 shells of marine origin located ~ 30 - 73 cm depth in all trenches P1 to P4 suggests a single  
 274 homogeneous sedimentary unit of relatively young age deposited in the lagoon. Considering  
 275 that the stratigraphic succession and related chronology are comparable in all trenches dug in  
 276 the same lagoon, we selected the radiocarbon dates younger than 2000 year BP that bracket  
 277 the white sandy layer unit (i.e., samples TSU P5 S4 and S5, TSU P3 S1 and S3 that predate  
 278 the unit, and sample TSU P3 S2 that postdates the unit). The Oxcal dating simulation provides  
 279 the 137 - 422 AD bracket of the white sandy layer unit that may be correlated with the  
 280 tsunami deposits of the 21 July 365 earthquake (Fig. 4).

281 North of the trench sites at Kefr Saber, the dating of shells (Dendropoma) of a sample  
 282 collected in a large boulder provide a radiocarbon calibrated date of 940-1446 AD. The dating  
 283 of Dendropoma collected in a boulder often marks the catastrophic coastal environmental  
 284 change with displaced large boulders from an intertidal to shoreline position due to a tsunami

clarity

indicates / points to

-30 and -73 !!  
 or between  
 -30 and -73  
 (43 cm in ?  
 thickness).

Does Dendropoma  
 have a shell or  
 is it a tube?

the precise  
 location of the  
 boulder and  
 its relation with  
 the cores and  
 provided  
 (or I missed it)

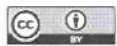

*Do Goff et al find boulders with Dendropoma?  
 Are the authors aware that severe storms may (one able to)  
 displace and rubricate large boulders even in marginal platforms  
 several meters above mean sea level?*

285 event (Goff et al., 2012). The Dendropoma sample age at Kefr Saber may correlate with the 8  
 286 August 1303 earthquake and tsunami event that dragged large boulders on the shoreline in  
 287 agreement with the results of Shah-Hosseini et al. (2016). However, we could not identify the  
 288 1303 event in the trenches dug in the nearby lagoon at Kefr Saber.

*Apart, the  
 location and  
 stratigraphic  
 position of the  
 boulder is  
 unknown!*

289 **5. 2. El Alamein site:** The 12 cores extend between 1 m and 2.6 m depth and except  
 290 for cores 1 and 9 which are shown in Figures 5 a and b, the detailed stratigraphic logs and  
 291 related measurements are presented in the supplemental material S2. In a previous  
 292 reconnaissance field investigation, a coarse and fine white sand layer was identified ~ 30 cm  
 293 depth in a test pit. Two charcoal samples El Al sa1 and El Al sa2 collected at 25 cm and 56  
 294 cm depth give 1680-1908 AD and 1661-1931 AD ages, respectively. The description of cores  
 295 is as following:

*30 cm below  
 present  
 surface*

296 **Core 1:** This core is located at ~166 m from the shoreline (Fig. 2 b), east of the study area  
 297 behind the sand dunes and near the outlet of the seawater. The core depth reached ~2.14 m  
 298 and the stratigraphic section includes 3 tsunami layers recognized as following (Fig. 5 a  
 299 section 1 and its continuation at depth in Fig. S2-1):

300 The first layer is at ~12.5 cm depth with ~34.5 thick brown clay sediments with poor sorting,  
 301 fine grain sediments, with high peak in magnetic susceptibility, rich in organic matter, and X-  
 302 ray image reflects clear lamination. The second layer which is located at ~70 cm depth has ~5  
 303 cm thickness, characterized by highly broken shells fragments with the extremely bad sorting  
 304 of sediments granulometry. The third layer at ~75 cm depth is ~22 cm thick, made of pale  
 305 yellow sand with bad sorting of sediments size, and a peak in magnetic susceptibility. The  
 306 chemical analysis shows the presence of gypsum and minor goethite, and X-ray scanning  
 307 shows some turbiditic structures. A fourth tsunami layer is identified at 158 cm (see Fig. S2-1;  
 308 section 2). It is characterized by pale brown silty clay, with broken shells fragments and  
 309 extremely poor sorting, and with a high peak of magnetic susceptibility.

*It consists of*

*poorly-sorted*

*Please  
 organize  
 description*

*1 cm*

*turbidites in the  
 lagoon... identi-  
 fied by X-Ray!!*

*From here on the authors  
 systematically refer to the  
 coarse-grained layers as  
 "tsunami layers".*

*(1) If these are fragments, it means that they are broken shells / bioclasts.  
 highly broken ?? please explain what you mean.*



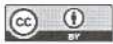

Two samples were collected for radiocarbon dating from core 1. The ~~first~~ and uppermost sample is a charcoal fragment at 40 cm depth located within a layer of catastrophic mixed sedimentary unit characterized by bad sorting, highly broken shells fragments and the peak of magnetic susceptibility. We interpret this layer as of tsunami origin and although its stratigraphy is located close to the surface, the mixed and reworked sedimentation explains the obtained old age 13985- 14415 BC (Table 2b). The second sample is a rodent bone at 50 cm depth and provides 403-603 AD calibrated age that postdate a catastrophic layer made of white sandy layer with broken shells. This catastrophic layer may correlate well with the 365 AD major earthquake of the eastern Mediterranean.

**Core 2:** As shown in ~~core 2~~ <sup>is it?</sup> is ~90 cm deep located south of core 1 at ~264 m from the shoreline (Fig. 2 b, Fig. S2 – 2). Two tsunami layers are identified. The first tsunami layer is ~12 cm thick brown clay ~~sediments~~ <sup>penetrated</sup> at ~13 cm depth, mixed with gravel and sand. The layer is rich in organic matter (> 1), with a small peak of magnetic susceptibility and where the geochemical analysis shows a minor component of goethite. The second layer at ~50 cm depth is ~15 cm thick, made of mixed yellow sand with silty-clay pockets, broken shells fragments, poor sorting and with peak magnetic susceptibility. It is rich in organic matter comparing to the other layer, and the geochemical analysis shows minor <sup>amounts</sup> component of halite.

Several samples were collected below and above the tsunami layers but, unfortunately, their content did not deliver enough carbon for dating. The two shells (gastropod) samples collected at 75 cm and 77 cm depth (well below the lowermost tsunami layer, Fig.S2-2) have calibrated dates 32971-34681 and 34362-36931 BC, respectively (Table 2b). These obtained ages may well be due to a mixed and/or reworked sedimentation.

**Core 3:** This core is located at 270 m from the shoreline and the outlet of sea water has revealed three tsunami layers (Fig. 2b and Fig. S2 – 3). The first tsunami layer is at ~25 cm depth and corresponds to <sup>a</sup> ~26 cm thick pale brown clay characterized by broken shells

??

with  
bioclasts

bioclasts (rich)

clarify  
- assumed  
presumable

large/small?  
peak?

the outlet  
has revealed?  
please ...

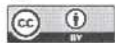

335 fragments and sediments rich in organic matter. The second layer at ~70 cm depth is 17.5 cm  
 336 thick characterized by white sand laminated at the top with a peak of magnetic susceptibility  
 337 near zero value, and with high organic matter > 2. The third tsunami layer at 106 cm depth is  
 338 32 cm thick, characterized by yellow sand with minor illite and broken shells fragments.

a peak at  
zero values?

339 Two shell samples were collected for dating at 37 cm and 45 cm depth and ~~show~~  
 340 calibrated dates 43618 BC and 34218-37224 BC respectively (Fig.S2-3 and Table 2b). These  
 341 two samples are located within the stratigraphic tsunami layer 2 and may correspond to  
 342 reworked sediments due to the high energy sedimentation during the catastrophic event.

have / yield

343 **Core 4:** The core is located at 435 m from the shoreline and shows sedimentary units where  
 344 we identify two tsunami layers with high magnetic susceptibility (Fig. S2 - 4). The first  
 345 tsunami layer is the white sand at ~12.5 cm depth 7 cm thick with poorly sorted sediments,  
 346 broken shells fragments with organic matter > 2. The second tsunami layer is a pale yellow  
 347 sand at ~102 to 130 cm depth, characterized by broken shell fragments in a yellow sand with  
 348 a minor amount of illite and gypsum.

349 One shell sample collected for dating at 37 cm depth provides a calibrated date 32887-  
 350 34447 BC respectively (Table 2b). This sample located in the stratigraphic tsunami layer 1  
 351 apparently results from high energy reworked sedimentation during the catastrophic event  
 352 (Fig. S2-4).

remobilization of older deposits under presumably high energy conditions tsunami?

353 **Core 5:** This is the southernmost core in the El Alamein site, located at 490 m distance from  
 354 the shoreline (Fig. 2 b; Fig. S2 - 5). The core reaches 73 cm ~~depth~~ <sup>a depth of</sup> and the sedimentary  
 355 succession does not show any possible catastrophic sedimentary layer of tsunami origin.  
 356 According to its content, core 5 may show the limit of inundation area with respect to at least  
 357 the first and second tsunami layers.

the inundated (flooded) area could be greater but, unless you find deposits, your hands are tied.

358 **Core 6:** This core is located south of the sand dunes at 320 m from the shoreline (Fig. 2 b). It  
 359 is characterized by three tsunami layers (Fig. S2 - 6). The first tsunami layer is a ~24 cm thick

these descriptions need a little rewriting for English is not a good one.

Perhaps it could be more didactic if descriptions are given from proximal to distal, regardless of the number of core

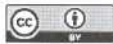

360 pale yellow sand with broken shells fragments (between 5 and 26 cm depth) and poorly sorted  
 361 sediments rich in organic matter (larger than 2.5). The second tsunami layer is ~18.5 cm thick  
 362 at 50 - 75 cm depth characterized by yellow sand with mixed gastropods and bivalves, and a  
 363 high value of magnetic susceptibility. The third tsunami layer at 130 cm depth is ~20 cm  
 364 thick, rich in organic matter, characterized by white sand mixed with gravel and pebble and  
 365 broken shells fragments.

bio clasts

366 Three samples were collected for dating in core 6. The first sample is a gastropod at  
 367 ~45 cm depth and shows 35002-37441 BC calibrated date. The second and third samples are  
 368 coral fragments at ~60 cm and ~80 cm depth that gave 42776-69225 BC and modern  
 369 (younger than 1650AD) calibrated ages. The first sample is above the tsunami layer 2 while  
 370 the second sample was within the stratigraphic tsunami layer 2 (Fig S2-7). These samples may  
 371 result from mixed sedimentation and reworking due to high current waves transport of  
 372 tsunamis.

shell

373 **Core 7:** This core was located at 273 m from the shoreline (Fig. 2 b). It is characterized by  
 374 sedimentary units that may include three tsunami layers within 120 cm core depth (Fig. S2 -  
 375 7). The first tsunami layer is a 6 cm thick brown sand with broken shell fragments at ~14 cm  
 376 depth and a considerable amount of gypsum with a minor amount of Illite and goethite. It is  
 377 rich with organic matter (> 2) of a swampy environment and the noticeable peak of magnetic  
 378 susceptibility. The second tsunami layer at 50 cm depth is 20 cm thick, characterized by  
 379 laminated pale brown clay mixed with gravel and pebbles at the bottom. The third tsunami  
 380 layer is 15 cm thick at 115 cm depth characterized by white sand, bad sorting sediments with  
 381 a minor amount of pyrite.

is gypsum  
detrital or  
cement?

a minor

382 A single sample of shell fragment collected at 17 cm depth for radiocarbon dating  
 383 within tsunami layer 1 provides 293-1113 BC.

- poor

- age



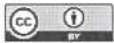

384 **Core 8:** This core is located at 214 m from the shoreline (Fig. 2 b). Three tsunami layers are  
 385 recognized (Fig. S2 - 8). The first tsunami layer is 16 cm thick <sup>a</sup> pale <sup>yellow</sup> silty clay at ~14 cm depth,  
 386 rich in organic matter, with minor amount of goethite, characterized by highly broken shell  
 387 fragments. The second layer is a 22 cm thick at ~52 cm depth, of pale yellow silty-clay with  
 388 broken shells, characterized by a high peak of magnetic susceptibility and rich inorganic  
 389 matter (>2.5). The third tsunami layer is 9 cm thick at ~128 cm depth, characterized by pale  
 390 yellow sand with ~~broken shells~~ fragments and ~~badly~~ <sup>poorly</sup> sorted angular gravel <sup>red clasts</sup> sediments. No  
 391 samples were suitable for dating in this core.

392 **Core 9:** The core is located at 130 m from the shoreline. Three tsunami layers are recognized  
 393 (Fig. 5 b; Fig. S2 - 9). The first tsunami layer is white sand at ~16 cm depth and 13 cm thick  
 394 with high content of organic matter and rips up clasts that appear in X-ray scanning  
 395 characterized by highly broken shells fragments and rich in organic matter. The second layer  
 396 at 67 cm depth is 22 cm thick characterized by white sand, with a peak of magnetic  
 397 susceptibility, high content of organic matter larger than 5. The third tsunami layer at 139 cm  
 398 depth is 14 cm thick characterized by broken shells fragments and white sand with highly  
 399 angular sediments that reflect the bad granulometric sorting. <sup>poor sorting.</sup>

400 Two samples were collected for dating in core 9. The first sample is a gastropod shell  
 401 located at 24 cm depth within the tsunami layer 1 that gives 1052-1888 BC calibrated age.  
 402 The second sample at 55 cm depth is a bivalve (lamellibranch) located above the tsunami  
 403 layer 2 dated at 40521-43169 BC calibrated age. These samples may have been transported  
 404 and re-deposited due to high current waves of the tsunami events.

405 **Core 10:** The core is located at 245 m from the shoreline (Fig. 2 b). Three tsunami layers are  
 406 recognized (Fig. S2 - 10). The first tsunami layer is 9 cm thick brown silty clay, at ~19 cm  
 407 depth with broken shells fragments, rich in organic matter (> 4) and high peak of magnetic  
 408 susceptibility; rip up clasts and laminations appear in X-ray scanning. The second layer 38 cm

pale what?  
 yellow/red/  
 green?...

natural / lithology of  
 gravel: too clastic,  
 silty clay etc,  
 rock fragments?

=

current / waves?



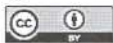

409 thick brown sand at 48 cm depth with broken fragments of shells, peak of magnetic  
 410 susceptibility and high organic matter ( $> 1.5$ ) at the bottom of the layer. The third tsunami  
 411 layer is 28 cm thick pale yellow sand at 101 cm depth characterized by rich organic matter  
 412 and sediments that reflect the bad sorting.

*high content  
of org. matter*

413 Two samples were collected for dating in core 10. The first sample located in the  
 414 tsunami layer 1 is a shell fragment at 24 cm depth that gives 2623-3521 BC calibrated age.  
 415 The second sample located in the tsunami layer 2 is a rodent bone at 70 cm depth <sup>*below surface*</sup> showing  
 416 41256-46581 BC calibrated age (see also Table 2b). Both samples may result from reworked  
 417 sedimentary units due to high current waves of tsunami events.

*with an estimated  
age of*

418 **Core 11:** The core is located at 151 m from the shoreline (Fig. 2 b). Three tsunami layers are  
 419 recognized (Fig.S2 - 11). The first tsunami layer is 10 cm thick white sand with broken shell  
 420 fragments at ~19 cm depth; the layer also shows high magnetic susceptibility, rich organic  
 421 matter ( $> 4$ ) with a high percent of gypsum ( $>50\%$ ). The second layer is 9 cm thick white  
 422 sand at 76 cm depth, with broken shell fragments, a high peak of magnetic susceptibility and  
 423 organic matter larger than 1.5. The third tsunami layer is 21 cm thick grey silty sand, with  
 424 broken shell fragments at 107 cm depth; bad sorting, high organic rich matter and a minor  
 425 amount of Illite and gypsum.

426 Eight samples were collected for dating in core 11. The sedimentary units at 112 - 175  
 427 cm depth (core bottom) and related succession of ages between 3943 BC and 2475 BC (from  
 428 shell gastropods and a charcoal fragment; see Table 2 b), may indicate a consistent dating of  
 429 the tsunami layer 3. However, the first sample (gastropod shell) at ~20 cm depth that gives  
 430 3638-4328 BC, the second sample (broken shell) at 62 cm depth with an age at 17869 - 18741  
 431 BC, and the 33294 - 36120 BC and 2619 - 3386 BC out of sequence dating (Table 2 b)  
 432 indicate samples of transported and reworked shells and sediments probably due to high  
 433 energy tsunami deposits.

*of the waves*

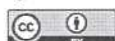

434 **Core 12:** The core is located at 127 m from the shoreline (Fig 2 b). Three tsunami layers are  
 435 recognized in section 1 and one tsunami layer in section 2 (Fig. S2 – 12 a, b). The first layer is  
 436 ~7.5-cm-thick at ~19-cm-depth and is made of poorly sorted white sandy deposits, and highly  
 437 broken gastropods and lamellibranch fossils. The layer is characterized by high values of  
 438 organic matter and magnetic susceptibility. The second layer is ~13-cm-thick white sandy  
 439 deposits intercalated with coarse brown sand at ~32.5-cm-depth, characterized by horizontal  
 440 lamination, poor sorting sediments, rich in organic matter and high peak of magnetic  
 441 susceptibility. The third layer is ~25-cm-thick grey sandy clay at 89-cm-depth, with  
 442 laminations at the bottom of deposits, vertically aligned gastropods, broken shells fragments,  
 443 rich in total organic matter and a high peak of magnetic susceptibility. A fourth tsunami layer  
 444 of medium to fine pale yellow sand, with broken shells fragments, is identified in section 2  
 445 (Fig. S2 – 12 b) at 151 cm depth. It is characterized by and poor sorting, high peak of  
 446 magnetic susceptibility, a large amount of organic matter (> 5.5) and high amount of gypsum.

How did the  
 org. matter and  
 gypsum?

447 Five samples were collected for dating in core 12. In core section 1, the first sample is  
 448 a gastropod found at 44 cm depth that gives an age of 3367-3366 BC. The second sample is a  
 449 shell found at 108 cm depth and shows an age of 3097-3950 BC (Table 2 b). The third sample  
 450 is a gastropod found at 114 cm depth dated at 3331-4050 BC. The fourth and fifth samples in  
 451 core section 2, sample are gastropod shells found at 117 cm and 135 cm depth with calibrated  
 452 age 39560- 40811 BC and 3365-4071 BC, respectively (Table 2 b). The fourth sample is off  
 453 sequence with respect to the other samples and may result from sediment transport and  
 454 reworking due to high energy tsunami waves. The other samples are in sequence from 4071 to  
 455 2457 BC age, comparable to the sedimentary succession of core 11.

beyond the  
 reach of the  
<sup>14</sup>C method.

456 **Results:** The sedimentary deposits in the El Alamein lagoon also result from  
 457 intercalated high-energy marine deposits into low energy marine and alluvial deposits with  
 458 reworked sedimentation. A first observation in almost all cores is the existence of the white

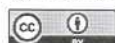

459 sand layer with broken shells of marine origin located 10 cm to 75 cm depth in El Alamein  
 460 site, and the identified three to four tsunami layers. The tsunami layers and their catastrophic  
 461 content are identified in photography and X-rays, magnetic susceptibility, organic/mineral  
 462 content and by the existence of mixed coarse and fine sand with broken marine shells. A main  
 463 difficulty, however, is the age determination of the tsunami layers due to the mixed  
 464 radiocarbon dates that can be ranged in old and young ages, between 50000 year BP - 13430  
 465 year BP, and 5065 year BP - 125 year BP, respectively, in all cores.

*from?  
 3 or 4?*

*bio clasts*

466 As the sedimentary units in the 1 m to 2.6 m depth cores result from young deposition  
 467 processes with high-energy marine units intercalated into low energy marine and alluvial  
 468 deposits, we consider the radiocarbon dating older than 13430 year BP as due to sedimentary  
 469 units that include reworked material. Considering that the succession of 2.6 m uppermost  
 470 deposits and related stratigraphic chronology are comparable in all cores in the El Alamein  
 471 lagoon, we select the radiocarbon dates younger than 5500 year BP as representative of the  
 472 recent sedimentary units that include tsunami layers. Using the radiocarbon dating of samples  
 473 and related selected young ages, the sedimentary sequence of catastrophic layers and their  
 474 ages obtained from the Bayesian simulation (Oxcal 4.2.4; Bronk-Ramsey, 2013) allow a  
 475 correlation with the AD 365, AD 1303 and AD 1870 tsunamigenic earthquakes of the east  
 476 Mediterranean Sea (Fig. 6). In addition, a fourth tsunami layer can be identified between 1126  
 477 BC and 1434 BC.

*as a result of  
 reworking of  
 older rocks*

## 479 6. Summary of results from trenching and coring

480 The cores and trenches in both Kefr Saber and El Alamein sites show three main  
 481 layers characterized by fine and coarse sand ~~mixed~~ <sup>*bio clasts*</sup> with broken shell fragments that indicate  
 482 the occurrence of high energy and catastrophic sedimentary deposits in the coastal lagoon  
 483 environment (Figs. 2 a, b, and c, and Fig. 3). Although the two studied sites are ~200 km

*penetrate / expose*

*we assume that*



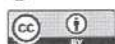

484 apart, a white sandy layer with broken shells is found in all trenches (see Fig. 3 and  
 485 supplemental material S1 a, b, c, d, e) and cores (except for core 5, see Figs. 5 a and b, and  
 486 supplemental material in Fig. S2 – 1 to 12). The recurrent white sandy deposits in trenches  
 487 and cores are well visible <sup>as</sup> coarse sand units mixed with gravel and broken shells that become  
 488 fine landward (see trench P4, Fig. 3) or disappear when distant from the shore (core 5, Fig. S2  
 489 – 5). All these signatures with only three layers in the ~ 2 m thick sedimentary units ~~indicate~~  
 490 that this layer suggests <sup>are</sup> tsunami deposits rather than storm.

491 In most cores (Figures. 5 a and b, and supplemental material Fig. S2 – (1 - 12), the  
 492 first tsunami layer is ~7.5-cm-thick at ~19 cm-depth and is made of poorly sorted white sandy  
 493 deposits with broken gastropods and lamellibranch (shell) fossils. This layer is characterized  
 494 by bi-modal grain size distribution with high value of organic matter and peak of magnetic  
 495 susceptibility with a rich content in carbonates and quartz. ~~The presence of goethite and pyrite~~  
 496 <sup>up</sup> heavy minerals ~~was~~ found in the cores at the base of layer 1, which contains rip up clasts from  
 497 underlying sediments. The second layer is ~13-cm-thick at ~32.5-cm-depth characterized by  
 498 white sandy deposits intercalated with coarse brown sand horizontal lamination, very poor  
 499 sorting of sediments, rich in organic matter and with a high peak of magnetic susceptibility.  
 500 ~~The~~ <sup>pebbles</sup> also are found at the base of this layer which reflects a loading structure. A  
 501 considerable amount of heavy minerals like <sup>g</sup> goethite and <sup>p</sup> pyrite can be found in this layer.  
 502 The third layer is ~25-cm-thick at ~89-cm-depth is made of grey sandy clay, with a high peak  
 503 of magnetic susceptibility, laminations at the bottom of deposits, vertically aligned  
 504 gastropods, broken shells <sup>fragments</sup>, and rich in total organic matter. In all three layers, the  
 505 poorly sorted sediments and organic content greater than 5 mark the high energy deposits and  
 506 tsunami records (Folk, 1968). All these characteristics at the El Alamein site lead us to  
 507 interpret the three sedimentary layers as tsunami deposits.

finer-grained  
 or thinner?

recuminate  
 surface

what do you  
 mean?

Does Folk  
 refer to  
 tsunamis?



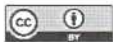

508 In a synthesis of all dated units in trenches and cores in Figures 4 and 6, the  
 509 sedimentary succession of low energy marine and alluvial deposits intercalated with high-  
 510 energy deposits provides evidence for the identification of four tsunami deposits at Kefr Saber  
 511 and El Alamein sites. In the case of Kefr Saber trenches, the dating of charcoal fragments  
 512 allows <sup>to bracket</sup> ~~the bracket~~ of a tsunami event with a simulated age between AD 137 and AD 422,  
 513 which includes the AD 365 western Crete earthquake (Figs. 4 and Table 2 a). The dating of  
 514 sedimentary units at the El Alamein site turned out to be more complex due to <sup>highly</sup> ~~the~~ reworked  
 515 sedimentation <sup>and</sup> ~~with~~ significant mix of old ( $> 13000$  year BP) and young ages ( $< 5500$  year BP;  
 516 Table 2 b). Using the latter ages, the radiocarbon dating (including the Oxcal Bayesian  
 517 analysis) of shells, bone and charcoals fragments at El Alamein site (Fig. 6) result <sup>in</sup> ~~in~~ a  
 518 sequence of ages that allow <sup>to</sup> ~~the~~ bracket of an event W between 1434 BC and 1126 BC, and  
 519 event X between AD 48 and AD 715, and event Y between AD 1168 and AD 1689, and an  
 520 event Z between AD 1805 and AD 1935 (Figure 6). The three most recent simulated dates of  
 521 tsunami events X, Y and Z correlate with the seismogenic tsunamis of AD 365, AD 1303 and  
 522 AD 1870 reported in catalogues (Table 1).

are W, X, Y and Z conventional names or simply informal terms used by you during your research?

523  
 524 **Discussions and Conclusions**  
 525 <sup>assumed</sup>  
 526 The identification of tsunami deposits within the stratigraphic layers and results of  
 527 radiocarbon dating allow the chronological simulation of the three most recent tsunami events  
 528 (Figs. 4 and 5). The historical seismicity catalogue of the Eastern Mediterranean reported two  
 529 significant tsunamigenic seismic events of the Hellenic subduction zone that affected the  
 530 Mediterranean coast of Egypt: 1) The 21 July 365 earthquake (Mw 8.3 – 8.5; Stiros and  
 531 Drakos, 2006; Shaw et al., 2008), 2) the 8 August 1303 earthquake (Mw 7.8 – 8.0; Abu Al  
 532 Fida, 1907; Ambraseys, 2009). A third tsunami event is also reported during the 24 June 1870  
 earthquake (Mw 7 - 7.5), but despite some debates on its occurrence, the inundation of the

I do not see the need of all these simulations. You have brackets of ages and correlate with the detected phenomena.

which is the origin of that debate?  
 I presume that you refer to the location of the epicenter? Please explain!

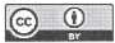

*So, the tsunami happened! There is no possible debate about this fact*

533 Alexandria harbour leaves no alternative on the tsunami waves on the Egyptian coastline (see  
 534 section 2). Hence, the dating of the three high energy sedimentary layers deposited along the  
 535 Egyptian coastline at Kefr Saber and El Alamein sites correlates <sup>well</sup> with the historically recorded  
 536 seismogenic tsunamis of the Hellenic subduction zone.

537 In our study, the distinction of tsunami sedimentary records from storm deposits is  
 538 based on: 1) The record of the small number (3 to 4) layers while storm deposits controlled by  
 539 seasonal climatic catastrophic events should have been more frequent. 2) The existence of  
 540 white sand sheet layers with broken shells at two sites (Kefr Saber and El Alamein) located  
 541 ~200 km apart, bearing comparable age, structure and texture. 3) The existence of organic  
 542 rich clasts in sand sheets of some cores (Shi et al., 1995; Gelfenbaum and Jaffe, 2003) which  
 543 indicates a catastrophic event with sufficient energy to break and erode the coastal barrier  
 544 made of the shoreline rocky headlands, organic sediments and coastal dunes before reaching  
 545 the lagoons. 4) The bimodal distribution of the grain size of sandy sedimentary units that  
 546 include a large proportion of broken shell comparable to that of tsunami deposits (Goff et al.,  
 547 2001, 2004). 5) The correlation between the simulated ages of tsunami layers from the  
 548 radiocarbon dating and the large historical tsunamigenic earthquakes of the eastern  
 549 Mediterranean (Figs. 4 and 6). 6) The consistent depth of tsunami layers in cores of the El  
 550 Alamein site (Fig. 7).

551 The lagoon sedimentary environment is a natural site of mixed and reworked marine  
 552 and continental deposits that may explain the mixed radiocarbon dates (Tables 2 a and b).  
 553 Indeed, by considering the mixed sedimentation of reworked deposits intercalated with new  
 554 units, our selection of samples younger than 2000 year BP at Kefr Saber, and younger than  
 555 5500 year BP at El Alamein allowed us to distinguish between old and new isotopic dating  
 556 and infer a consistent chronology of tsunami deposits. For instance at the El Alamein lagoon,  
 557 the clear separation between old (50000 year BP to 13430 year BP) and young (5065 year BP -

*If you are talking about your recently-penetrated core why do you mix with other people and localities that have nothing to do with the Eastern Mediterranean*

*perhaps really no less storms are less frequent!*

*these are not your cores?*

*] is this like this in Egypt?*

*- why simulated? you have datings.*

*but reworked to a certain extent!*

*- ? "in situ" "autochthonous"*

*] with respect to what?*



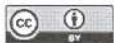

125 year BP) radiocarbon dating, with no intermediate dates of sedimentation, confirms the different origin and processes of deposition. The radiocarbon dating indicate that the white sand and coarse mixed layers represent deposits that may result from tsunamis events in 365, 1303 and 1870 (see Table 1). The first two events are large earthquakes with  $M_w \geq 8$  with well documented tsunami waves in the historical sources. The evidence of the 365 tsunami seems to be widely recorded through widespread massive turbidities of the eastern Mediterranean region (Stanley et al., 2006; Polonia et al., 2016). The four main catastrophic layers in trenches and cores have physical and chemical characteristics that correlate with high energy environmental conditions of tsunami deposits. The four high magnetic susceptibility peaks of the four deposits also correlate with the high value of organic matter and carbonates.

The record of past tsunami deposits is favored by the low topography and platform geomorphology along the Egyptian Mediterranean coastline. The coastal environment with similar lagoons and dunes with large areas with relatively flat morphology allowed the deposits of catastrophic marine deposits intercalated within alluvial deposits. The lagoon shapes elongated along the shoreline at Kefr Saber and El Alamein sites explain the similarity between the sedimentary units and the tsunami deposits. The correlation between the core deposits at El Alamein and trench deposits at Kefr Saber are marked by the dating of tsunami deposits and the correspondence with the AD 365 earthquake. The succession of sudden high-energy deposits with low energy and slow sedimentation may include reworked units with a disturbance in their chronological succession. In comparison with the trench results of Kefr Saber, the sedimentary sequence from cores at El Alamein reveals mixed old and young dates likely due to the sedimentary environment with large lagoon and nearby topography with the supply of colluvial and alluvial deposits. Despite the richness of charcoal fragments, bones and shells in the sedimentary record, the reworking implies significant out of sequence dating and large uncertainties (see Table 2 b, among 30 samples 12 dated samples are > 30 ka).

and Bernasconi

recognized?

which type of organic matter?

explain

that might

(1) including charcoal, <sup>23</sup>presumably? and perhaps rodent bones? obviously, most of shells (marine) are ~ of the assumed age of the high energy event.

mixed marine derived - land derived

is this what you reply?

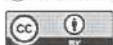

583 Although the results of dated shells may be suspicious (due to the unclosed mineralogical  
584 system), their reliability is tested with the comparison of nearby radiocarbon dating. *of what?*

585 The size of past tsunamis can be compared with the thickness of catastrophic  
586 sedimentary units in trenches of Kefr Saber and core units of the El Alamein site. It appears  
587 that the tsunami deposits of the AD 365 tsunamigenic earthquake *is thicker* have a larger thickness at  
588 Kefr Saber site than at the El Alamein site. In contrast, the thickness of sedimentary layers of  
589 the AD 1303 and AD 1870 are thicker at the El Alamein site. These observations can be  
590 justified by the proximity of the tsunamigenic source in western Crete of the AD 365  
591 earthquake with respect to the Kefr Saber paleotsunami site, and the proximity of the AD  
592 1303 and AD 1870 seismic sources in the east Hellenic Arc with regards to the El Alamein  
593 paleotsunami site. Our results on the identification of past tsunamis and their repetition along  
594 the coastlines in Egypt and North Africa are decisive for the tsunami wave propagation and  
595 hazard models in the East Mediterranean Sea (Salama, 2017).

596

597 **Author contribution:**

598 A. Salama and M. Meghraoui wrote the text manuscript; A. Salama did the analysis of trench  
599 and core deposits, and interpretation of tsunami events; M. Meghraoui, M. El Gabry, H.  
600 Hussein and I. Korrat did the earthquake data analysis and interpretation; all authors  
601 contributed to the field investigations.

602

603 **Competing interests:** The authors declare that they have no conflict of interest.

604

605 **Supplement:**

606 Supplementary data associated with this manuscript are:

- 607 ■ Figures S1 a, b, c, d and e of five trench logs of Kefr Saber site (trench P4 as Fig. 3).



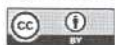

608     ▪ Figure S2 – 1 (section 2) to 10 of core descriptions of El Alamein site (cores 1 and 9 as  
 609       Figs a and b).

610  
 611

## 612     **Acknowledgments**

613     We are grateful to Prof. Hatem Odah and NRIAG administration, and staff for their keen  
 614     efforts and help during the development of this work. We are grateful to the North African  
 615     Group for Earthquake and Tsunami studies (NAGET) and Drs. Assia Harbi, Adel Samy,  
 616     Hany Hassen, Mohamed Maklad, Mohamed Sayed for support and discussions. We are  
 617     grateful to the “*Centre d'Etudes Alexandrine*” for the lending of the COBRA instrument for  
 618     coring. We address our special thanks to the Egyptian Armed Forces for issuing permissions  
 619     and their support during field work. This research programme is conducted with the funding  
 620     support of the ASTARTE EC project (Assessment, Strategy And Risk Reduction for  
 621     Tsunamis in Europe - FP7-ENV2013 6.4-3, Grant 603839), the French-Egyptian IMHOTEP  
 622     project, and the Academy of Scientific Research and Technology of Egypt.

623

624

## 625     **References**

- 626     Abbas, M.S., El-Morsy, M.H., Shahba, M.A. and Moursy, F.I.: Ecological studies in coastal  
 627       sand dune rangelands in the North-West of Egypt, Meeting of the Sub-network on  
 628       Mediterranean Forage Resources of the FAO-CIHEAM Inter-regional Cooperative  
 629       Research and Development Network on Pastures and Fodder Crops, Spai: , 389–393,  
 630       2008.
- 631     Abu al-Fida Ismail Ibn Hamwi (born 1273 – died 1331). : The Concise History of Humanity  
 632       or Chronicles (in Arabic '*Tarikhu 'al-Mukhtasar fi Akhbar al-Bashar*' in 1329). Al-  
 633       Husayniyah Press, Cairo, 2 volumes , 1112 p., 1907.
- 634     Ambraseys, N.N., Melville, C.P. and Adam, R.D.: The seismicity of Egypt, Arabia and Red  
 635       Sea: A Historical Review, Cambridge University Press, 181 p., 1994.

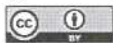

- 636 Ambraseys, N.: Earthquakes in the Mediterranean and Middle East: A Multidisciplinary  
 637 Study of Seismicity up to 1900, Cambridge University Press, 947 p., 2009.
- 638 Atwater, B.: Evidence for great holocene earthquakes along the outer coast of Washington  
 639 state, *Science*, 236, 942 – 944, 1987.
- 640 Babu, N., Suresh Babu D.S. and Mohan Das P.N.: Impact of tsunami on texture and  
 641 mineralogy of a major placer deposit in southwest coast of India, *Environmental Geology*  
 642 52, 71–80, 2007.
- 643 Ben Menahem, A.: Earthquake catalogue for the Middle East (92 B.C. to 1980 A.D.)  
 644 *Bollettino di Geofisica Teorica ed Applicata*, 21, 245–310, 1979.
- 645 Ben Menahem, A.: Four thousand years of seismicity along the Dead Sea rift, *Journal of*  
 646 *Geophysical Research*, 96, 195–216, 1991.
- 647 Bronk-Ramsey, C.: Bayesian analysis of Radiocarbon, *Radiocarbon*, 51(1), 337–360, 2009.
- 648  
 649 Bronk-Ramsey, C., & Lee S.: Recent and Planned Developments of the Program OxCal,  
 650 *Radiocarbon*, 55(2-3), 720–730, 2013.
- 651 Coumbary, A. : Sur le tremblement de terre du 24 juin 1870, *Nouvelles Météorologiques*  
 652 *Paris*, 3, 200–201, 1870.
- 653 CMT catalogue; Centroid Moment Tensor catalogue of Harvard,  
 654 <http://www.seismology.harvard.edu/search.html>, 2018.
- 655 De Martini, P.M., Barbano, M.S., Pantosti, D., Smedile, A., Pirrotta, C., Del Carlo, P., and  
 656 Pinzi, S.: Geological evidence for paleotsunamis along eastern Sicily (Italy): An  
 657 overview: *Natural Hazards and Earth System Sciences*, 12 (8), 2569–2580, 2012.
- 658 Donato, S.V., E.G. Reinhardt, J.I.Boyce, R. Rothaus & T. Vosmer.: Identifying tsunami  
 659 deposits using bivalve shell taphonomy, *Geology*, 36 (3), 199–202, 2008.
- 660 El-Sayed, A., Korrat, I., and Hussein, H. M.: Seismicity and seismic hazard in Alexandria  
 661 (Egypt) and its surroundings, *Pure and Applied Geophysics*, 161, 1003–1019, 2004.
- 662 Folk, R.L.: Petrology of sedimentary rocks, in Austin, Texas, HemphilPs Book Store, 182 p.,  
 663 1968.
- 664 Font, E., C. Nascimento, Baptista M.A. & Silva P.F.: Identification of tsunami induced  
 665 deposits using numerical modelling and rock magnetism techniques: A study case of the  
 666 1755 Lisbon tsunami in Algarve, Portugal, *Physics of the Earth and Planets Interiors*,  
 667 182, 187–198, 2010
- 668 Frihy, O.E., Deabes, E. a., and El Gindy, A. a.: Wave Climate and Nearshore Processes on the  
 669 Mediterranean Coast of Egypt: *Journal of Coastal Research*, 261, 103–112, 2010.

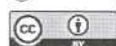

- 670 Galanopoulos, A.G.: The seismic sea-wave of 9 Iouliou 1956, Praktika Academy Athens, 32,  
 671 90–101, 1957.
- 672 Goff, J., Chague-Goff, C., and Nichol, S.: Palaeotsunami deposits: A New Zealand  
 673 perspective, *Sedimentary Geology*, 143 (1–6), 2001.
- 674 Goff, J. R., McFadgen, B. G., and Chagué-Goff, C.: Sedimentary differences between the  
 675 2002 Easter storm and the 15th century Okoropunga tsunami, southeastern North Island,  
 676 New Zealand, *Marine Geology*, 204, 235–250, 2004.
- 677 Goff J, Dudley WC, de Maintenon MJ, Cain G, Coney JP.: The largest local tsunami in 20th  
 678 century Hawaii, *Marine Geology* 226, 65–79, 2006
- 679 Goff, J.R., Lane, E., Arnold, J.: The tsunami geomorphology of coastal dunes, *Natural*  
 680 *Hazards Earth System Sciences*, 9 (3), 847–854, 2009.
- 681 Goff, J., Chagué-Goff, C., Nichol, S., Jaffe, B., Dominey-Howes, D.: Progress in  
 682 palaeotsunami research, *Sedimentary Geology*, 243, 70–88, 2012.
- 683 Guidoboni, E., Comastri, A. and Traina G.: Catalogue of Ancient Earthquakes in the  
 684 Mediterranean area up to the 10th century, INGV-SGA, Bologna, 504 p., 1994.
- 685 Guidoboni, E., and A. Comastri : Catalogue of earthquakes and tsunamis in the Mediterranean  
 686 area from the 11th to the 15th century, INGV-SGA, Bologna, 1037 p., 2005.
- 687 Gelfenbaum, G., and B. Jaffe .: Erosion and sedimentation from the 17 July, 1998 Papua New  
 688 Guinea tsunami, *Pure and Applied Geophysics*, 160, 1969–1999, 2003.
- 689 Hassouba, A.B.H.: Quaternary Sediments from the Coastal Plain of Northwestern Egypt  
 690 (from Alexandria to Elomayid), *Carbonates and Evaporites*, 10 (1), 8–44, 1995.
- 691 Hall AM, Hansom JD, Williams DM, and Jarvis J.: Distribution, geomorphology and  
 692 lithofacies of cliff- top storm deposits: examples from the high-energy coasts of Scotland  
 693 and Ireland. *Marine Geology*, 232, 131–155, 2006.
- 694 Hamouda, A.Z.: Numerical computations of 1303 tsunamigenic propagation towards  
 695 Alexandria, Egyptian coast, *Journal African Earth Science*, 44, 37–44, 2006.
- 696 Hamouda, A.Z.: A reanalysis of the AD 365 tsunami impact along the Egyptian  
 697 Mediterranean coast, *Acta Geophysica*, 58 (4), 687–704, 2009.
- 698 Jusseret, S. and Sintubin, M., Minoan Earthquakes: Breaking the Myth through  
 699 Interdisciplinarity, *Studies in Archaeological Sciences*, Leuven University Press, 440 pp.,  
 700 2017
- 701 Maamoun, M., Megahed, A. and Allam, A.: Seismicity of Egypt, *NRIAG Bulletin*, IV (B),  
 702 109–160, 1984.



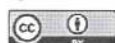

- 703 Maramai, A., Brizuela, B., Graziani, L. : The Euro- Mediterranean tsunami catalogue. *Annals*  
 704 *of Geophysics*, 57 (4), 1-26, 2014.
- 705 Marriner, N., Kaniewski, D., Morhange, C., Flaux, C., Giaime, M., Vacchi, M., and Goff, J.:  
 706 Tsunamis in the geological record, Making waves with a cautionary tale from the  
 707 Mediterranean, *Science Advances*, 1-12, 2017.
- 708 Malik, J.N., Banerjee, C., Khan, A., Johnson, F.C., Shishikura, M., Satake, K., and Singhvi,  
 709 A.K.: Stratigraphic evidence for earthquakes and tsunamis on the west coast of South  
 710 Andaman Island, India during the past 1000years, *Tectonophysics*, 661, 49–65, 2015.
- 711 Matsumoto, D., H. Naruse, S. Fujino, A. Surphawajraksakul, T., Jarupongsakul, N., Sakakura  
 712 & M. Murayama : Truncated flame structures within a deposit of the Indian Ocean  
 713 Tsunami: evidence of syn-sedimentary deformation, *Sedimentology*, 55, 1559-1570,  
 714 2008.
- 715 Maouche, S., Morhange, C. and Meghraoui, M.: Large boulder accumulation on the Algerian  
 716 coast evidence tsunami events in the western Mediterranean, *Marine Geology*, 262 (1),  
 717 96-104, 2009.
- 718 Morhange, C., Marriner, N., Pirazzoli, P.A.: Evidence of Late-Holocene tsunami events from  
 719 Lebanon, *Z. Geomorphology*, 46, 81–95, 2006.
- 720 Nanayama, F., Satake, K., Furukawa, R., Shimokawa, K., Atwater, B.F., Shigeno, K., and  
 721 Yamaki, S.: Unusually large earthquakes inferred from tsunami deposits along the Kuril  
 722 trench, *Nature*, 424 (6949), 660–663, 2003.
- 723 Paris, R., F., Lavigne, P., Wassmer, and J., Sartohadi : Coastal sedimentation associated with  
 724 the December 26, 2004 tsunami in Lhok Nga, West Banda Aceh (Sumatra, Indonesia).  
 725 *Marine Geology*, 238, 93–106, 2007.
- 726 Papadopoulos, G.A., E. Daskalaki, A. Fokaefs and N. Giraleas.: Tsunami hazard in the  
 727 Eastern Mediterranean Sea: strong earthquakes and tsunamis in the West Hellenic Arc  
 728 and Trench System, *Journal Earthquake and Tsunami*, 4 (3), 145-179, 2010.
- 729 Papadopoulos, G. A., Grácia, E., Urgeles, R., Sallares, V., De Martini, P. M., Pantosti, D.,  
 730 González, M., Yalciner, A. C., Mascle, J., Sakellariou, D., et al.: Historical and pre-  
 731 historical tsunamis in the Mediterranean and its connected seas: Geological signatures,  
 732 generation mechanisms and coastal impacts, *Marine Geology*, 354, 81–109, 2014.
- 733 Polonia, A., Vaiani, S.C., de Lange, G.J.: Did the A.D. 365 Crete earthquake/tsunami trigger  
 734 synchronous giant turbidity currents in the Mediterranean Sea?, *Geology*, 44, 191-194,  
 735 2016.

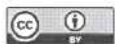

- 736 Poirier, J. P. and Taher, M.A.: Historical Seismicity in the near and Middle East, North  
 737 Africa, and Spain from Arabic Documents (VIIth- XVIIIth Century). *Bulletin Society*  
 738 *Seismology American*, 70 (6), 2185–2201, 1980.
- 739 Reimer PJ, and 24 co-authors.: Selection and treatment of data for radiocarbon calibration: an  
 740 update to the International Calibration (IntCal) criteria, *Radiocarbon*, 55 (4), 1869–1887,  
 741 2013.
- 742 Salama, A.: Active tectonics and Paleo-tsunami records of the Northern Coast of Egypt, Ph.D  
 743 thesis dissertation, University of Strasbourg (France), 429 pp., 2017.
- 744 Salamon, A., Rockwell, T., Ward, S. N., Guidoboni, E. & Comastri, A.: Tsunami hazard  
 745 evaluation of the Eastern Mediterranean: Historical analysis and selected  
 746 modeling, *Bulletin of the Seismological Society America*, 97, 705–724, 2007.
- 747 Schmidt, J.F.: Studien ueber Erdbeben. 1-136, 316-360, Leipzig, 1879.
- 748 Srinivasalu S, Rajeshwara-Rao N, Thangadurai N, Jonathan M P, Roy P D, Rammohan V and  
 749 Saravanan P., 2009. Characteristics of 2004 tsunami deposits of northern Tamil Nadu  
 750 coast, India: *Boletin de la Sociedad Geologica Mexicana*, 61, 111–118, 2009.
- 751 Shah-Hosseini, M., Saleem, A., Mahmoud, A. and Morhange, C.: Coastal boulder deposits  
 752 attesting to large wave impacts on the Mediterranean coast of Egypt, *Natural Hazards*, 83  
 753 (2), 849–865, 2016.
- 754 Shaw, B., Ambraseys, N. N., England, P.C., Floyd, M., Gorman, G.J., Higham, T.F.G.,  
 755 Jackson, J., Nocquet, J-M., Pain, C. C., and Piggott, M. D.: Eastern Mediterranean  
 756 tectonics and tsunami hazard inferred from the AD 365 earthquake, *Nature Geoscience*, 1  
 757 (April), 268–276, 2008.
- 758 Shi, S., Dawson, A.G. & Smith, D.E. Coastal sedimentation associated with the December  
 759 12th, 1992 tsunami in Flores, Indonesia, *Pure and Applied Geophysics*, 144, 525–536,  
 760 1995.
- 761 Soloviev, S.L., Solovieva, O.N., Go, C.N., Kim, K.S., and Shchetnikov, N.A.: Tsunamis in  
 762 the Mediterranean Sea 2000 B.C.-2000 A.D., *Advances in Natural and Technological*  
 763 *Hazards Research*, Kluwer Academic Publishers, Dordrecht, Netherlands, 13, 237 p.,  
 764 2000.
- 765 Stanley, J.D. – Bernasconi, M.P.: Holocene depositional patterns and evolution in  
 766 Alexandria's eastern harbor, Egypt, *Journal of Coastal Research*, 22 (2), 283–297, 2006.
- 767 Stiros, S. C.: The AD 365 Crete Earthquake and Possible Seismic Clustering During the  
 768 Fourth to Sixth Centuries AD in the Eastern Mediterranean: A Review of Historical and  
 769 Archaeological Data, *Journal of Structural Geology*, 23, 545–562, 2001.

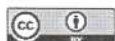

- 770 Stiros, S., and Drakos, A.: A fault model for the tsunami-associated magnitude >8.5 Eastern  
 771 Mediterranean, AD 365 earthquake, *Zeitschrift für Geomorphologie*, 146, 125–137,  
 772 2006.
- 773 Spiske, M., Böcz, Z., and Bahlburg, H.: The role of porosity in discriminating between  
 774 tsunami and hurricane emplacement of boulders—a case study from the Lesser Antilles,  
 775 southern Caribbean, *Earth Planet. Science Letters*, 268, 384–396, 2008.
- 776 Switzer, A. D. and Jones, B. G.: Large scale washover sedimentation in a freshwater lagoon  
 777 from the southeast Australian coast: sea level change, tsunami or exceptionally large  
 778 storm?, *The Holocene*, 18 (5), 787–803, 2008.
- 779 Szczucinski, W., Chaimanee, N., Niedzielski, P., Rachlewicz, G., Saisuttichai, D., Tepsuwan,  
 780 T., Lorene, S. and Siepak, J.: Environmental and geological impacts of the 26  
 781 December 2004 Tsunami in coastal zone of Thailand- Overview of short and long term  
 782 effects. In: *Polish Journal of Environmental studies*, 15 (5), 793–810, 2006.
- 783 Taymaz, T., Westaway, R., and Reilinger, R.: Active faulting and crustal deformation in the  
 784 Eastern Mediterranean region, *Tectonophysics*, 391, 1–9, 2004.
- 785 Tinti, S., Maramai, A. and Graziani, L.: A New Version of the European Tsunami Catalogue:  
 786 Updating and Revision, *Natural Hazards and Earth System Sciences*, 1, 255–262, 2001.
- 787 Tinti, S., Manucci, A., Pagnoni, G., Armigliato, A., and Zaniboni, F.: The 30 December 2002  
 788 landslide-induced tsunamis in Stromboli: sequence of the events reconstructed from the  
 789 eyewitness accounts, *Natural Hazards and Earth System Science*, 5 (6), 763–775, 2005.
- 790 Tuttle, M.P., Ruffman, A., Anderson, T., and Jeter, H.: Distinguishing tsunami from storm  
 791 deposits in eastern North America: the 1929 Grand Banks tsunami versus the 1991  
 792 Halloween storm, *Seismological Research letters*, 75, 117–31, 2004.
- 793 Yalciner, A., Zaytsev, A., Aytore, B., Insel, I., Heidarzadeh, M., Kian, R., and Imamura, F.: A  
 794 Possible Submarine Landslide and Associated Tsunami at the Northwest Nile Delta,  
 795 Mediterranean Sea: *Oceanography*, 27, (2), 68–75, 2014.
- 796



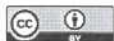

797

798 **Figure captions**

799 Figure1: Seismicity (instrumental with  $M > 5.5$ ) and main tectonic framework of the east  
 800 Mediterranean regions. Black boxes indicate the paleoseismic sites of Kefr Saber and El  
 801 Alamein east of the Nile delta. The major historical earthquakes (Table 1) AD 365 ( $M_w$  8 –  
 802 8.5), AD 1303 ( $M_w$  ~8) and AD 1870 ( $M_w$  ~7.5) are located along the Hellenic subduction  
 803 zone according to Guidoboni et al. (1994), Stiros (2001); Ambraseys (2009); Papadopoulos et  
 804 al. (2014) and Jusseret and Sintubin (2017). Focal mechanisms are CMT-Harvard (last  
 805 accessed January 2018), and the background topography is from GEBCO.

806

807 Figure 2: Location of trenches and core sites at (a) Kafr Saber, (b) El Alamein (see also  
 808 Figure 1), and (c) Dune ridge and a lagoon south of the Mediterranean Sea as a selected site  
 809 for coring and trenching. *where?*

810

811 Figure 3: a) Trench dimensions at Kefr Saber, and (b) description of sedimentary layers of  
 812 trench P 4 with carbon dating sampling (yellow flag); the horizontal ruler indicates 20 cm  
 813 scale. *panorama. I can't distinguish the size of scale*  
*there are two of them!*

814

815 Figure 4: Radiocarbon dating calibrated with probability density function (pdf) using Oxcal  
 816 version 4.2 (Bronk-Ramsey, 2013) and chronology of sedimentary layers and tsunami record  
 817 of trenches at Kefr Saber. The dating characteristics are in Table 2 a. The Bayesian dating  
 818 simulation of the white sandy unit in Fig. 3 b can be correlated with the 365 AD tsunami  
 819 event.

820

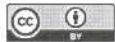

821 Figure 5: a) Core 1 description with X-ray scanning, lithology log, magnetic susceptibility,  
822 mean grain size, sediment sorting, total organic and inorganic matter and bulk mineralogy.

823 The arrows show the high values of each measurement that may correlate with tsunami  
824 deposits.

*These are hands with pointing fingers!*

825 b) Core 9 photography, X-ray scanning, lithology log, magnetic susceptibility, mean grain  
826 size, sediment sorting, total organic and inorganic matter and bulk mineralogy. The arrows  
827 show the high values of each measurement that may correlate with tsunami deposits.

828 (Similar illustrations of cores 2 to 12 are in supplemental materials).

829

830 Figure 6: Radiocarbon dating calibrated with probability density function (pdf) using Oxcal  
831 version 4.2 (Bronk-Ramsey, 2013) and chronology of sedimentary layers with dated tsunami  
832 records at El Alamein. The dating characteristics are in Table 2 b. Black pdfs refer to the  
833 dated samples and red pdfs are simulated dating of the four tsunami records. Three  
834 sedimentary records are correlated with the historical earthquake and tsunami catalogue of the  
835 eastern Mediterranean (See also Table 1).

836

837 Figure 7: Depth distribution of tsunami layers in cores at the El Alamein site (see also core  
838 locations in Fig. 2 b). The depth correlation of paleotsunami layers indicates the consistent  
839 succession of deposits in the lagoon. Deposits of layers 1, 2 and 3 are related with tsunami  
840 events 1870 AD, 1303 AD and 365 AD of the East Mediterranean Sea (see also Fig. 6 and  
841 Table 1). Layer 4 corresponds to tsunami event 1491 – 1951 BC and is not reported in  
842 tsunami catalogues.

843

844

845

846

*meaning?*

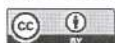

847 **Table captions**

848 Table 1: Major earthquakes of the eastern Mediterranean with tsunami wave reports in  
849 northern Egypt. Estimated magnitudes are given in  $M_w$  when calculated and in  $M$  when  
850 estimated.

851

852 Table 2 a: Radiocarbon dating samples and calibrated ages at Kefr Saber site using OxCal  
853 v4.2.4 (Bronk-Ramsey, 2013).

854

855 Table 2 b: Radiocarbon dating samples and calibrated ages in El Alamein site using OxCal  
856 v4.2.4 (Bronk-Ramsey, 2013)

857

858

859

860

861



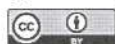

Table 1: Major earthquakes of the eastern Mediterranean with tsunami wave reports in northern Egypt. Estimated magnitudes are given in  $M_w$  when calculated and in  $M$  when estimated.

| Date         | Epicentre                  | Estimated Magnitude | Comment                               | Reference                                                |
|--------------|----------------------------|---------------------|---------------------------------------|----------------------------------------------------------|
| 21 July 365  | Western Crete              | 8.3 – 8.5 ( $M_w$ ) | Tsunami northern Egypt                | Stiros and Drakos, 2006; Shaw et al., 2008, Hamouda 2009 |
| 18 Jan. 746  | Dead Sea Fault             | 7.5 (M)             | Tsunami eastern Medit.                | Ambraseys, 1962                                          |
| 881 - 882    | Palestine                  | ?                   | Tsunami in Alexandria & Palestine     | Galanopoulos A., 1957                                    |
| 4 Jan. 1033  | Jordan Valley Fault        | 7.4 (M)             | Tsunami northern Egypt                | Ambraseys, 1962                                          |
| 18 Jan. 1068 | Northern Lebanon           | 6.9 (M)             | Waves in Lebanon Until northern Egypt | Ambraseys, 1962, Soloviev et al., 2000                   |
| 8 Aug. 1303  | Karpathos & Rhodos islands | 8 (M)               | >8-m-high wave in Alexandria          | Abu al-Fida 1329, Ambraseys 2009, Hamouda 2006           |
| 24 June 1870 | Hellenic Arc               | $M_L$ 7.2           | Inundation in Alexandria harbour      | Ben-Menahem, 1979, Soloviev et al., 2000                 |

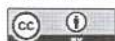

872 Table 2 a: Radiocarbon dating samples and calibrated age at Kefr Saber site using OxCal  
 873 v4.2.4 (Bronk-Ramsey, 2013).  
 874

| No. | Sample name | Laboratory Name | Type of samples | Depth (m) | Date BP          | Calibrated. date |
|-----|-------------|-----------------|-----------------|-----------|------------------|------------------|
| 1   | KSB2S2      | Poznan          | Dendropoma      | Boulder   | 890 ± 30 BP      | 940 - 1446 AD    |
| 2   | TSU P1 S07B | Poznan          | Charcoal        | 35        | 110.14±0.3 BP    | Modern           |
| 3   | TSU P1 S09B | CIRAM           | Charcoal        | 53        | 40560 BP         | 39000-38250 BC   |
| 4   | TSU P3S2    | CIRAM           | charcoal        | 73        | 2000 BP          | 50-70 AD         |
| 5   | TSU P3S3    | CIRAM           | Charcoal        | 100       | 6240 BP          | 5300 – 5070 BC   |
| 6   | TSU P3 S2   | Poznan          | Charcoal        | 72        | 1075 ± 30 BP     | 890 – 1020 AD    |
| 7   | TSU P4 S2   | CIRAM           | Charcoal        | 61        | Modern           | -                |
| 8   | TSU P4 S3   | CIRAM           | Charcoal        | 40        | Modern           | -                |
| 9   | TSU P4 S4   | CIRAM           | Charcoal        | 15        | Modern           | -                |
| 10  | TSU P4 S5   | Poznan          | Charcoal        | 60        | 15490 ± 70 BP    | 17200 – 15900 BC |
| 11  | TSU P4 S6   | Poznan          | Charcoal        | 25        | 101.42 ± 0.68 BP | 1700 – 1920 AD   |
| 12  | TSU P5S1    | Poznan          | Charcoal        | 12        | 2145 ± 30 BP     | 360 – 50BC       |
| 13  | TSU P5S2    | Poznan          | Charcoal        | 37        | 4560 ± 300 BP    | 4000 – 2400 BC   |
| 14  | TSU P5S3    | Poznan          | Charcoal        | 17        | 2060 ± 35 BP     | 180 – 30 AD      |
| 15  | TSU P5S4    | Poznan          | Charcoal        | 33        | 2590 ± 140 BP    | 1050 – 350 BC    |

- 875  
 876 ■ CIRAM Lab. science for art cultural heritage ,archeology department [http://www.ciram-](http://www.ciram-art.com/en/archaeology.html)  
 877 [art.com/en/archaeology.html](http://www.ciram-art.com/en/archaeology.html)  
 878 ■ Poznan Lab. Poznan Radiocarbon Laboratory, Poland, email: [c.fourteen@radiocarbon.pl](mailto:c.fourteen@radiocarbon.pl)  
 879 <http://radiocarbon.pl/index.php?lang=en>.  
 880 ■ Beta Analytic radiocarbon dating, Miami, Florida, USA <http://www.radiocarbon.com/>, e-mail:  
 881 [lab@radiocarbon.com](mailto:lab@radiocarbon.com)  
 882  
 883

884  
 885  
 886  
 887  
 888  
 889  
 890

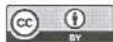

891 Table 2 b: Radiocarbon dating samples and calibrated date in El Alamein site using OxCal  
 892 v4.2.4 (Bronk-Ramsey, 2013)  
 893

| No. | Sample name       | Laboratory Name | Type of samples  | Depth (m) | Date BP    | Calibrated date (2σ) |
|-----|-------------------|-----------------|------------------|-----------|------------|----------------------|
| a   | AL1 S1 (test pit) | CIRAM           | charcoal         | 25        | 130±20     | 1680-1908 AD         |
| b   | AL1 S2 (test pit) | CIRAM           | charcoal         | 56        | 190±20     | 1661-1931 AD         |
| 1   | core 1/1sa1       | Poznan          | charcoal         | 40        | 13430±60   | 13985-14415 BC       |
| 2   | core 1/1sa2       | Poznan          | Bone             | 50        | 1540±60    | 403-634 AD           |
| 3   | core2/1sa4        | Poznan          | gastropods       | 77        | 35500±500  | 34362-36931 BC       |
| 4   | core2/1sa6        | Poznan          | gastropods       | 75        | 32000±360  | 32971-34681 BC       |
| 5   | core 3/1sa1       | Poznan          | shell            | 45        | 33500±600  | 34218- 37224 BC      |
| 6   | core 3/1sa2       | Poznan          | bivalve          | 37        | 45000±2000 | 43618 BC             |
| 7   | core 4/1sa1       | Poznan          | shell            | 28        | 31840±350  | 32887-34447BC        |
| 9   | core 6/2 sa1      | Poznan          | charcoal         | 80        | 125±30     | <1620 AD             |
| 10  | core 6/1 sa6      | Poznan          | gastropod        | 45        | 34000±400  | 35002-37441 BC       |
| 11  | core 6/1sa9       | Poznan          | coral            | 60        | 50000±4000 | 42776-69225 BC       |
| 12  | core 7/1sa1       | Poznan          | shell            | 17        | 3000±30    | 293-1113 BC          |
| 12  | core 9/1sa1       | Poznan          | gastropod        | 24        | 3320±30    | 1052-1888 BC         |
| 13  | core 9/1sa5       | Poznan          | bivalve          | 55        | 40000±800  | 40521-43169 BC       |
| 14  | core 10/1sa2      | Poznan          | bone             | 70        | 42000±1300 | 41256-46581 BC       |
| 15  | core10/1sa3       | Poznan          | shells           | 20        | 4515 ±30   | 2623-3521 BC         |
| 16  | core11/2sa1       | Beta analytic   | roots            | 139       | 4810±30    | 2666 - 2817 BC       |
| 17  | core 11/1sa1      | Beta analytic   | gastropod        | 20        | 5230±30    | 3638-4328 BC         |
| 18  | core11/2Sa4       | Poznan          | gastropod +shell | 116       | 4500±35    | 2619-3386 BC         |
| 19  | core11/2sa6       | Poznan          | gastropod        | 126       | 4405±35    | 2477-3368 BC         |
| 20  | core11/2 sa11     | Beta analytic   | shells           | 152       | 32500±500  | 33294-36120 BC       |
| 21  | core 11/2sa2      | Beta analytic   | shell            | 62        | 16900±60   | 17869-18741 BC       |
| 22  | core 11-2         | Beta analytic   | charcoal         | 180       | 5020±30    | 3710-3943 BC         |
| 23  | core 11 2_5       | Poznan          | gastropod        | 121       | 4360±40    | 2457-3366 BC         |
| 24  | core 12/1 sa1     | Poznan          | gastropod        | 44        | 5065±30    | 3367-4072 BC         |
| 25  | core 12/2sa1      | Beta analytic   | gastropod        | 108       | 4885±35    | 3097-3950 BC         |
| 26  | core 12/2sa2      | Poznan          | gastropod        | 114       | 5000±35    | 3331-4050 BC         |
| 27  | core 12/2 sa3     | Beta analytic   | broken shell     | 117       | 37940±420  | 39560 -40811 BC      |
| 28  | core 12/2sa4      | Beta analytic   | roots            | 135       | 5060±30    | 3365-4071 BC         |

894  
 895 ■ CIRAM Lab. science for art cultural heritage ,archeology department [http://www.ciram-](http://www.ciram-art.com/en/archaeology.html)  
 896 [art.com/en/archaeology.html](http://www.ciram-art.com/en/archaeology.html)



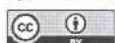

- 897   ▪ Poznan Lab. Poznan Radiocarbon Laboratory, Poland, email: c.fourteen@radiocarbon.pl  
898       <http://radiocarbon.pl/index.php?lang=en>.  
899   ▪ Beta Analytic radiocarbon dating, Miami, Florida, USA <http://www.radiocarbon.com/>, e-mail:  
900       lab@radiocarbon.com  
901

902

903

904

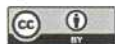

905 Figure 1

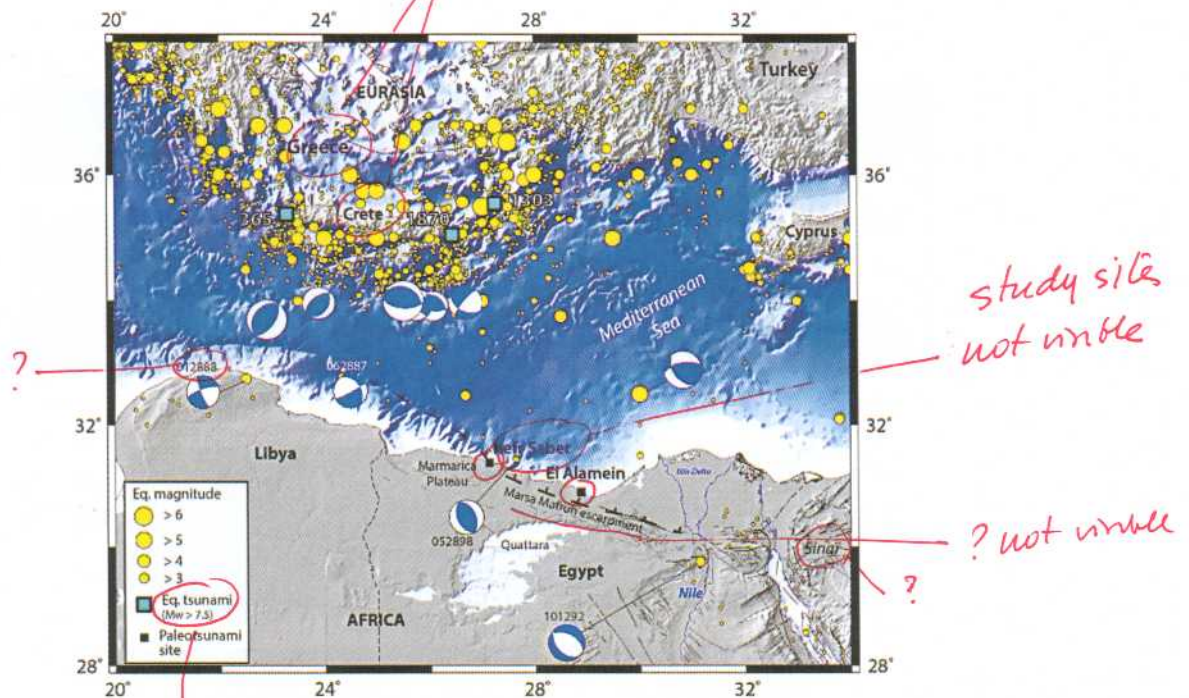

906  
 907  
 908  
 909

This figure is so overcrowded with symbols and colours that it is almost impossible to read. Names (localities) are very small and readers will need a lens to read. Rense, please.

You should indicate which seismic focus are highlighted in text. And clearly identify them.

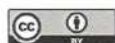

910 Figure 2

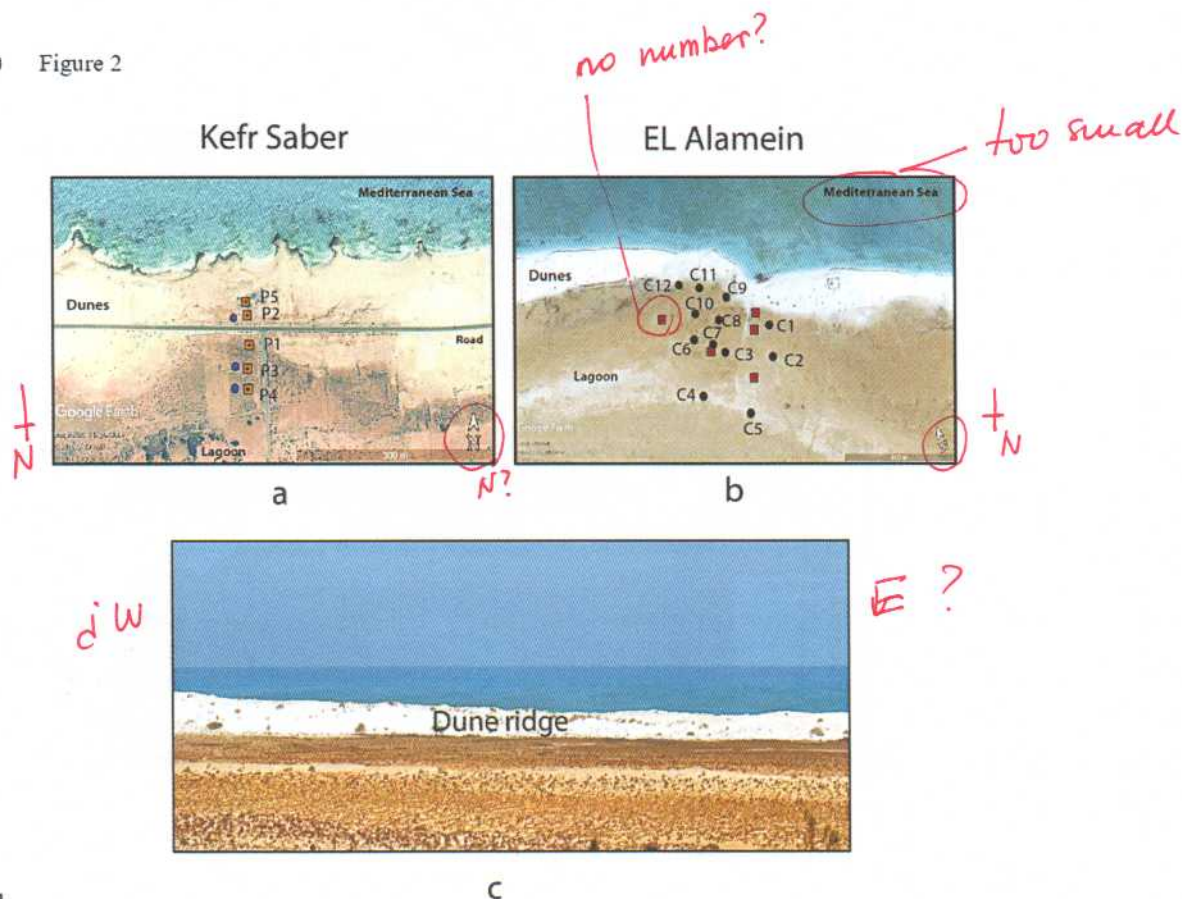

911

912

913

The aim of these pictures is to show  
 sites of trenches/drills. Please use  
 bigger type to make them visible.

- Location
- orientation



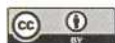

914 Figure 3

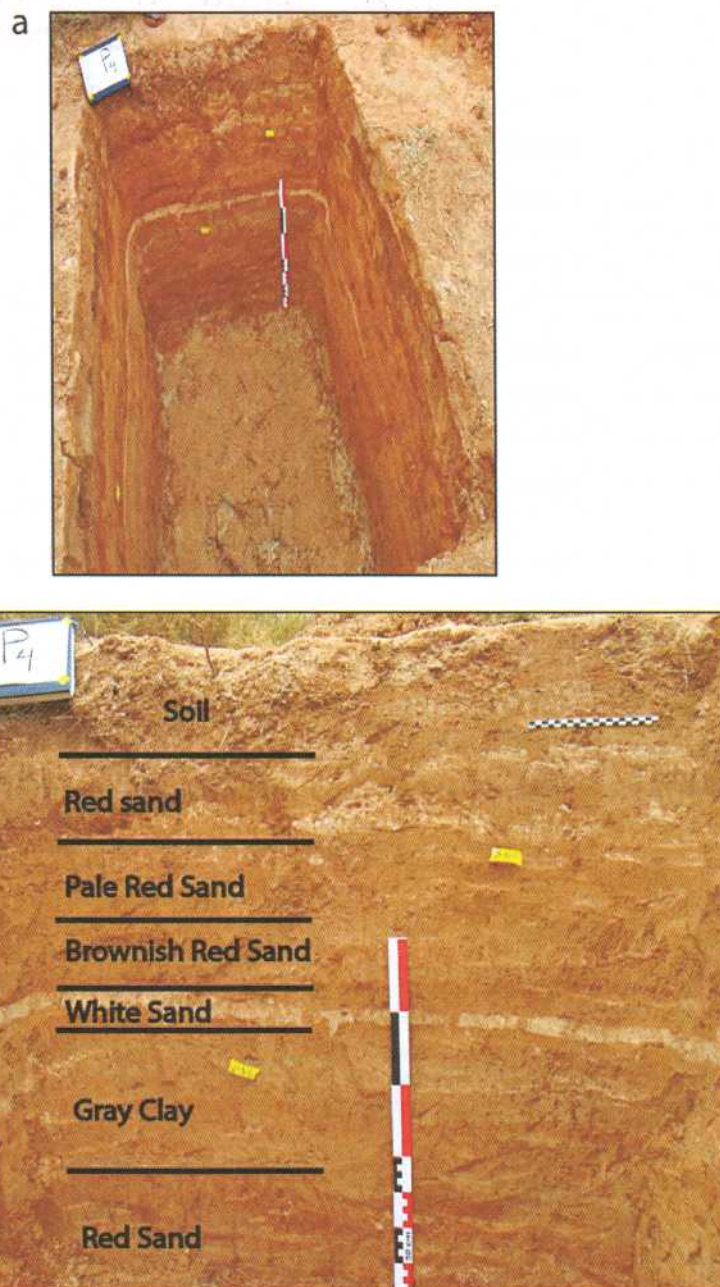

915

916

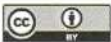

I'd suggest using BP age, as the traditional AC/DC is somewhat confusing. Then, the authors may return to the AC/DC nomenclature in the conclusions, to fit the more classical pictures/news!  
Kafr Saber

917  
918 Figure 4

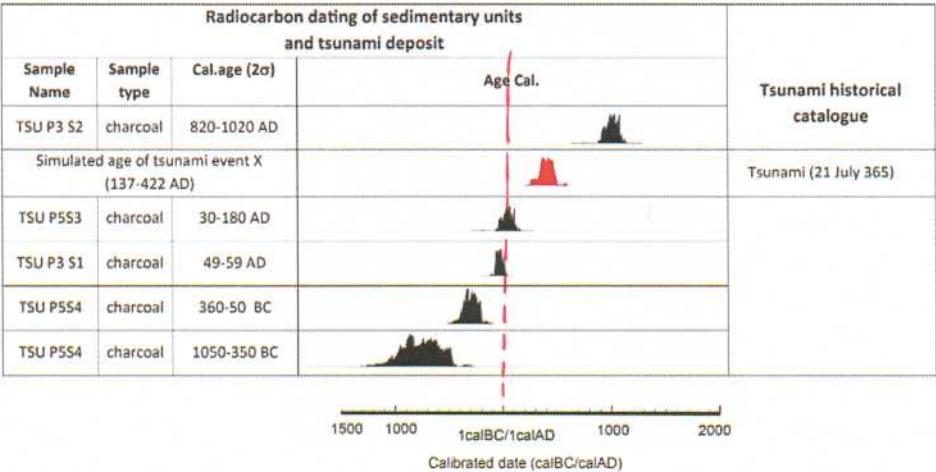

919  
920  
921  
922 Figure 5 a

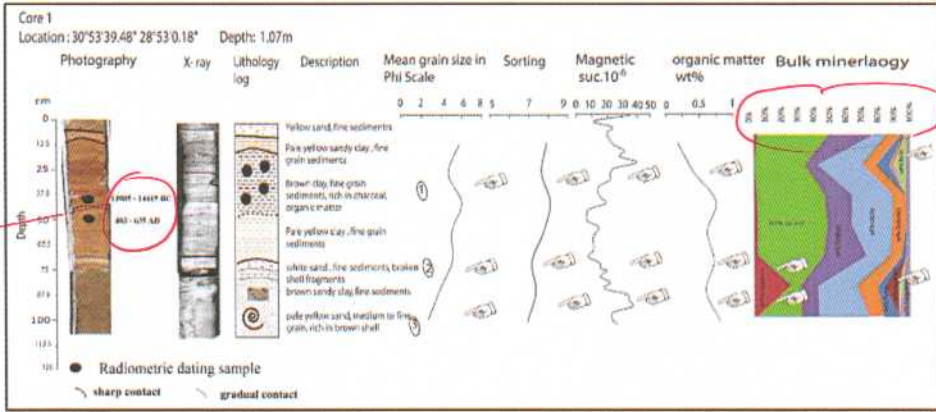

923  
924  
925  
926

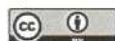

*HARD TO READ*  
*Not legible!*  
*mind the sizes*  
*of type you use!*

927 Figure 5 b

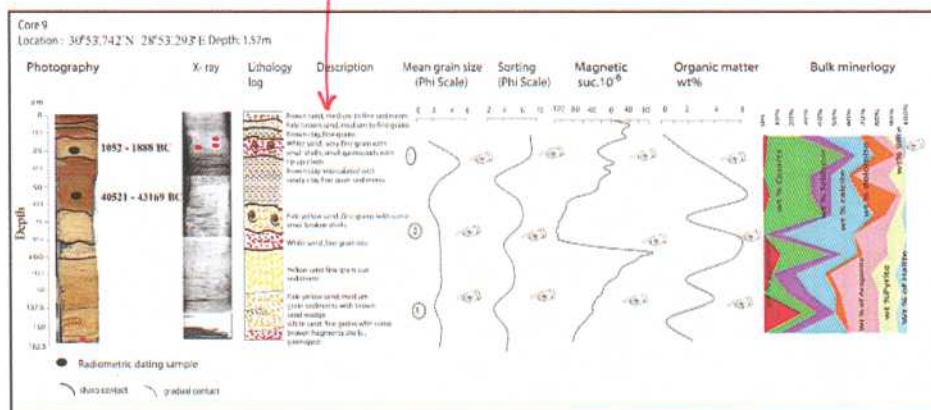

928

929

930 Figure 6

## El Alamein

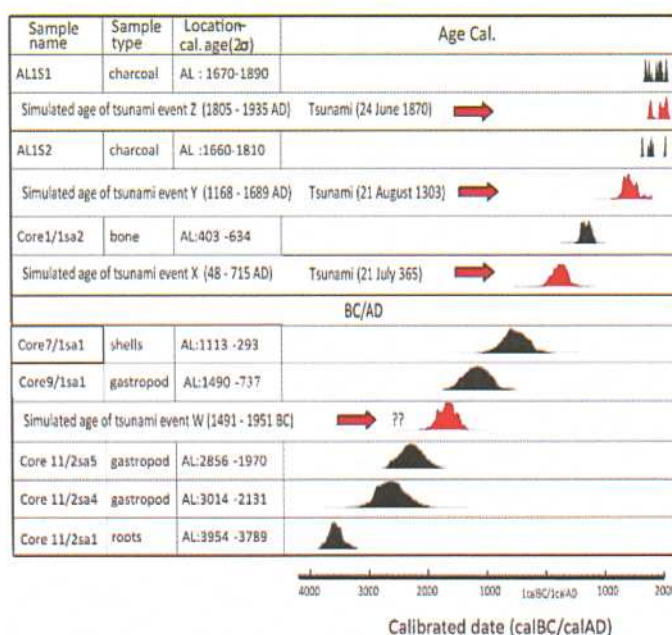

931



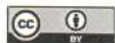

~N  
 - SEA

~S  
 - LAND

932

933 Figure 7

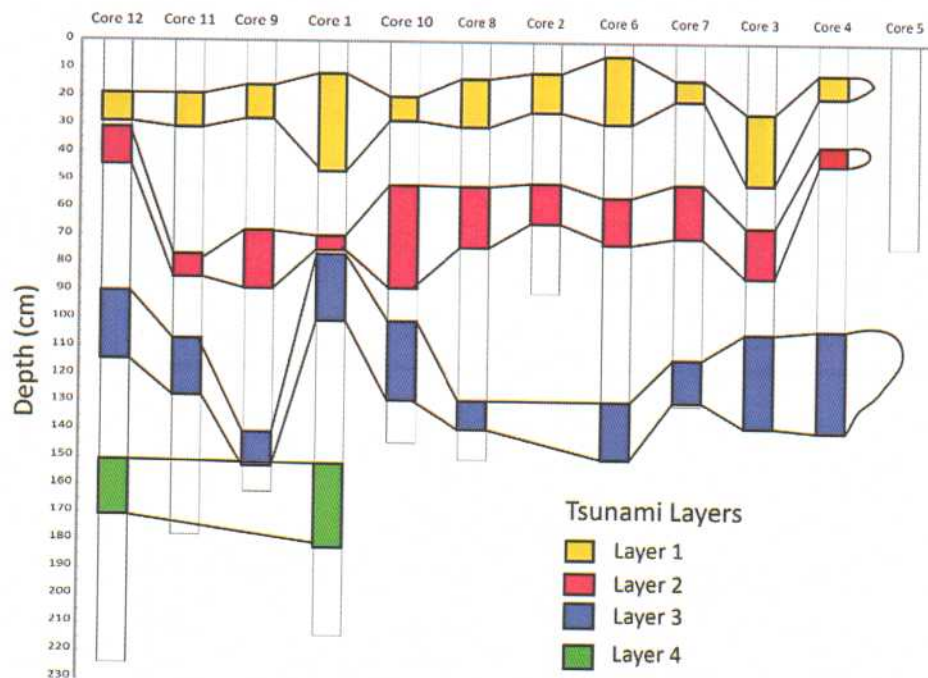

934

935

936

937
